# Supplementary material for: Asymmetric higher-order [10 + n] cycloadditions of palladium-containing 10π-cycloaddends
Source: Royal Society of Chemistry journal article supplement (doi:10.1039/d2sc02985e), 2022-01-01

## Asymmetric higher-order [10+n] cycloadditions of palladium-containing 10 $\pi$ -cycloaddends

Ao Li,<sup>a,‡</sup> Yang Gao,<sup>a,‡</sup> Jian-Bin Lu,<sup>a</sup> Zhi-Chao Chen,<sup>a</sup> Wei Du,<sup>\*a</sup> and Ying-Chun Chen<sup>\*a,b</sup>

<sup>a</sup> Key Laboratory of Drug-Targeting and Drug Delivery System of the Education Ministry and Sichuan Province, and Sichuan Research Center for Drug Precision Industrial Technology, West China School of Pharmacy, Sichuan University, Chengdu 610041, China.

<sup>b</sup> College of Pharmacy, Third Military Medical University, Shapingba, Chongqing 400038, China.

<sup>‡</sup> A. Li and Y. Gao equally contributed to this work.

E-mail: duweiyb.scu.edu.cn; ycchen@scu.edu.cn

### Supplementary Information

#### Table of Contents

|                                                                            |     |
|----------------------------------------------------------------------------|-----|
| 1. General methods.....                                                    | S1  |
| 2. Procedure for preparation of allylic alcohol and carbonate 1.....       | S2  |
| 3. Procedure for preparation of ligand L4 .....                            | S7  |
| 4. Detailed screening conditions for asymmetric [10+n] cycloadditions..... | S8  |
| 5. General procedure for asymmetric cycloadditions .....                   | S13 |
| 6. More screening studies for substrate scope.....                         | S40 |
| 7. Asymmetric reaction on a 1.0 mmol scale .....                           | S44 |
| 8. Crystal data and structural refinement for enantiopure 3a .....         | S45 |
| 9. Mechanism study .....                                                   | S47 |
| 10. References.....                                                        | S50 |
| 11. NMR, HRMS spectra and HPLC chromatograms.....                          | S51 |

## 1. General methods

Unless otherwise noted, all reactions were carried out at ambient temperature; when the reactions required heating, the heat source was oil bath.  $^1\text{H}$  NMR (400 or 600 MHz),  $^{13}\text{C}$  NMR (100 or 150 MHz) and  $^{19}\text{F}$  NMR (376 MHz) spectra were recorded on Varian INOVA-400/54, Agilent DD2-600/54 or Bruker Ascend<sup>TM</sup> 400 instruments (Chemical shifts were reported in ppm from tetramethylsilane with the solvent resonance as the internal standard in  $\text{CDCl}_3$  solution, unless otherwise noted). The following abbreviations were used to explain the multiplicities: s = singlet, d = doublet, t = triplet, dd = double doublet, ddd = double double doublet, dt = double triplet; td = triple doublet; tt = triple triplet, m = multiplet, br = broad, and coupling constants ( $J$ ) are reported in Hertz (Hz). High resolution mass spectra (HRMS) were recorded on a Waters SYNAPT G2, Agilent G1969-85000 or Shimadzu LCMS-IT-TOF using a time-of-flight mass spectrometer equipped with electrospray ionization (ESI) source. X-ray diffraction experiments were carried out on an Agilent Gemini or Bruker APEX-II CCD diffractometer and the data obtained were deposited at the Cambridge Crystallographic Data Centre. In each case, diastereomeric ratio was determined by  $^1\text{H}$  NMR analysis and enantiomeric excess was determined by HPLC (Agilent Technologies: 1220 Infinity II, 1200 Series, 1260 Infinity) analysis on a chiral column in comparison with an authentic racemate, using a Daicel Chiralpak AD-H Column (250  $\times$  4.6 mm), Chiralpak IE (250  $\times$  4.6 mm) or Chiralpak IA Column (250  $\times$  4.6 mm). UV detection was monitored at 254 nm. The specific optical rotation was obtained from Rudolph Research Analytical Autopol I automatic polarimeter in  $\text{CHCl}_3$  solution at 25  $^\circ\text{C}$ . The melting points were obtained from WRX-4 Mel-Temp apparatus. Column chromatography was performed on silica gel (200–300 mesh) eluting with ethyl acetate (EtOAc) and petroleum ether. TLC was performed on glass-backed silica plates. UV light,  $\text{I}_2$ , and solution of potassium permanganate were used to visualize products or starting materials. All chemicals were used without purification as commercially available unless otherwise noted. Petroleum ether (60–90  $^\circ\text{C}$ ) was redistilled. (*S*)-(+)-1,1'-Binaphthyl-2,2'-diyl phosphate (*S*)-**A1** and diphenyl phosphate **A2** were passed over a column of silica to remove water. 2-Methylene-2,3-dihydro-1*H*-inden-1-one **S1**,<sup>1</sup> 5-nitro-1-indanone **S7**,<sup>2</sup>  $\alpha$ -cyano chalcones **2**,<sup>3</sup> barbiturate-derived alkenes **4**,<sup>4</sup> benzylidene Meldrum's acid **6**,<sup>5</sup> barbiturate-heptafulvene **8**,<sup>6</sup> 2-benzylidenebenzo[*b*]thiophen-3(2*H*)-one **10**,<sup>7</sup> and (*2S,5R*)-2-(((tert-butyl)dimethylsilyl)oxy)methyl)-5-phenylpyrrolidine **S13**<sup>8</sup> were prepared according to the literature procedures.

## 2. Procedure for preparation of allylic alcohol and carbonate 1

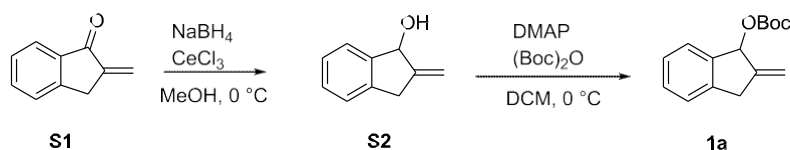

CeCl<sub>3</sub> (0.222 g, 0.901 mmol, 1.0 equiv) was added to a stirred solution of **S1** (0.130 g, 0.902 mmol, 1.0 equiv) in MeOH (2 mL) at 0 °C. After 10 min, NaBH<sub>4</sub> (34.0 mg, 0.900 mmol, 1.0 equiv) was added, and the mixture was stirred for 0.2 h. Water (5 mL) was added and the resultant slurry was filtered through Celite and washed with Et<sub>2</sub>O (15 mL). The combined filtrates were washed with saturated NaHCO<sub>3</sub> (2 × 20 mL), brine (2 × 20 mL) and dried over anhydrous Na<sub>2</sub>SO<sub>4</sub>. After concentration, the residue was purified by flash chromatography on silica gel (EtOAc/petroleum ether = 1/5) to afford **S2** (0.123 g, 84% yield) as a colorless oil.

DMAP (9.8 mg, 0.080 mmol, 0.2 equiv) was added to a stirred solution of **S2** (60.0 mg, 0.411 mmol, 1.0 equiv) in DCM (5 mL). (Boc)<sub>2</sub>O (0.140 mL, 0.620 mmol, 1.5 equiv) was added dropwise at 0 °C, and the mixture was stirred for 0.2 h. After completion, the mixture was concentrated and purified by chromatography on silica gel (EtOAc/petroleum ether = 1/15) to afford **1a** (18.1 mg, 18% yield) as a yellow oil.

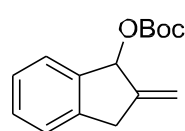

**tert-Butyl (2-methylene-2,3-dihydro-1H-inden-1-yl) carbonate (1a):** Colorless oil; <sup>1</sup>H NMR (400 MHz, CDCl<sub>3</sub>): δ (ppm) 7.43 (d, *J* = 7.2 Hz, 1H), 7.35 (d, *J* = 7.6 Hz, 1H), 7.29–7.21 (m, 1H), 7.22–7.13 (m, 1H), 6.83 (s, 1H), 5.00 (s, 2H), 3.44 (s, 2H), 1.50 (s, 9H); <sup>13</sup>C NMR (100 MHz, CDCl<sub>3</sub>): δ (ppm) 153.5, 144.2, 143.5, 142.7, 130.7, 126.4, 124.9, 123.7, 121.2, 82.3, 65.2, 39.4, 27.8; HRMS (ESI-TOF) *m/z*: [M + Na]<sup>+</sup> Calcd for C<sub>15</sub>H<sub>18</sub>O<sub>3</sub>Na<sup>+</sup> 269.1148; Found 269.1140.

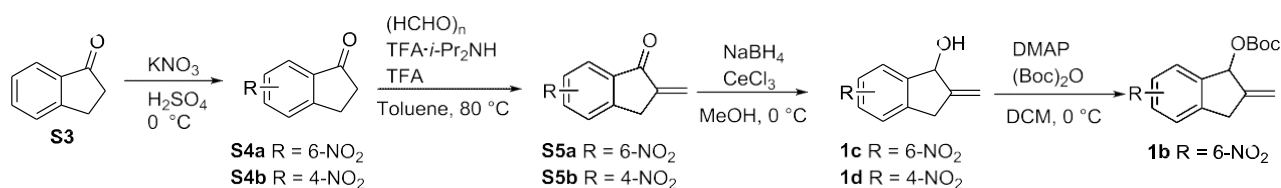

A solution of potassium nitrate (8.79 g, 86.9 mmol, 2.25 equiv) in concentrated sulfuric acid (50 mL) was added dropwise to the solution of **S3** (5.15 g, 39.0 mmol, 1.0 equiv) in concentrated sulfuric acid (30 mL) at 0 °C over 0.5 h. The mixture was stirred at 0 °C for 1 h. Then the mixture was poured into ice water (300 mL) and extracted with EtOAc (3 × 50 mL). After the removal of solvent, the crude product was purified by flash chromatography on silica gel (EtOAc/petroleum ether = 1/5) to afford **S4a** (2.99 g, 43% yield) and **S4b** (1.31 g, 19% yield) as a brown solid.

To a suspension of **S4a** (2.20 g, 12.4 mmol, 1.0 equiv), (HCHO)<sub>n</sub> (1.49 g, 49.6 mmol, 4.0 equiv) and TFA·*i*-Pr<sub>2</sub>NH (2.67 g, 12.4 mmol, 1.0 equiv) in toluene (60 mL) was added TFA (0.090 mL, 1.2 mmol, 0.1 equiv). The mixture was stirred at 80 °C. After completion, the mixture was cooled to room temperature and filtered through Celite. The cake was washed with EtOAc (3 × 20 mL). The combined filtrates were washed with saturated NaHCO<sub>3</sub> (2 × 30 mL), brine (2 × 30 mL) and dried over anhydrous Na<sub>2</sub>SO<sub>4</sub>. After concentration, the residue was purified by flash chromatography on silica gel (EtOAc/petroleum ether = 1/5) to afford **S5a** (1.60 g, 68% yield) as a white solid. **S5b** was prepared similarly from **S5b**.

CeCl<sub>3</sub> (0.389 g, 1.58 mmol, 1.0 equiv) was added to a stirred and cooled (0 °C) solution of **S5a** (0.300 g, 1.59 mmol, 1.0 equiv) in MeOH (5 mL). After 10 min, NaBH<sub>4</sub> (0.0597 g, 1.58 mmol, 1.0 equiv) was added, and the mixture was stirred at 0 °C for 0.2 h. Water (5 mL) was added and the resultant slurry was filtered through Celite and washed with Et<sub>2</sub>O (25 mL). The combined filtrates were washed with saturated NaHCO<sub>3</sub> (2 × 20 mL), brine (2 × 20 mL) and dried over anhydrous Na<sub>2</sub>SO<sub>4</sub>. After concentration, the residue was purified by flash chromatography on silica gel (EtOAc/petroleum ether = 1/5) to afford **1c** (0.209 g, 69% yield) as a white solid. **1d** was prepared similarly from **S5b**.

DMAP (12.7 mg, 0.104 mmol, 0.2 equiv) was added to a stirred solution of **1c** (0.100 mg, 0.523 mmol, 1.0 equiv) in DCM (7 mL). (Boc)<sub>2</sub>O (0.180 mL, 0.784 mmol, 1.5 equiv) was added dropwise at 0 °C, and the mixture was stirred for 0.2 h. After completion, the mixture was concentrated and purified by chromatography on silica gel (EtOAc/petroleum ether = 1/15) to afford **1b** (0.136 g, 90% yield) as a colorless oil.

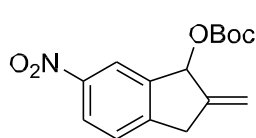

**tert-Butyl (2-methylene-6-nitro-2,3-dihydro-1H-inden-1-yl) carbonate**

**(1b)**: Yellow oil; <sup>1</sup>H NMR (600 MHz, CDCl<sub>3</sub>): δ (ppm) 8.35 (s, 1H), 8.21 (d, *J* = 8.4 Hz, 1H), 7.41 (d, *J* = 8.4 Hz, 1H), 6.43 (s, 1H), 5.63 (s, 1H), 5.45 (s, 1H), 3.89 (d, *J* = 20.4 Hz, 1H), 3.67 (d, *J* = 21.0 Hz, 1H), 1.54 (s, 9H); <sup>13</sup>C NMR (150 MHz, CDCl<sub>3</sub>): δ (ppm) 153.4, 149.9, 145.2, 141.6, 125.4, 124.8, 121.5, 115.5, 83.1, 78.8, 36.8, 27.8, 27.4; **HRMS** (ESI-TOF) *m/z*: [M + Na]<sup>+</sup> Calcd for C<sub>15</sub>H<sub>17</sub>NO<sub>5</sub>Na<sup>+</sup> 314.0999; Found 314.0990.

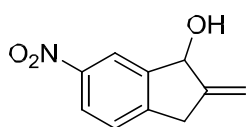

**2-Methylene-6-nitro-2,3-dihydro-1H-inden-1-ol (1c)**: White solid, mp: 59–

61 °C; <sup>1</sup>H NMR (400 MHz, CDCl<sub>3</sub>): δ (ppm) 8.28 (d, *J* = 2.4 Hz, 1H), 8.13 (dd, *J* = 8.4, 2.4 Hz, 1H), 7.38 (d, *J* = 8.4 Hz, 1H), 5.55–5.53 (m, 2H), 5.35–5.33 (m, 1H), 3.80–3.65 (m, 2H), 2.43 (s, 1H); <sup>13</sup>C NMR (100 MHz, CDCl<sub>3</sub>): δ (ppm) 151.1, 148.3, 147.7, 145.7, 125.4, 124.0, 120.3, 111.6, 75.7, 36.6; **HRMS** (ESI-TOF) *m/z*: [M + H]<sup>+</sup> Calcd for C<sub>10</sub>H<sub>10</sub>NO<sub>3</sub><sup>+</sup> 192.0661; Found 192.0652.



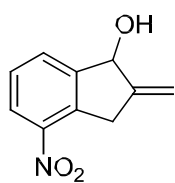

**2-Methylene-4-nitro-2,3-dihydro-1H-inden-1-ol (1d)**: Yellow solid, mp: 53–55 °C;  $^1\text{H NMR}$  (400 MHz,  $\text{CDCl}_3$ ):  $\delta$  (ppm) 8.15 (d,  $J = 8.4$  Hz, 1H), 7.78 (d,  $J = 7.2$  Hz, 1H), 7.49–7.44 (m, 1H), 5.55–5.52 (m, 2H), 5.40–5.38 (m, 1H), 4.21–4.01 (m, 2H), 2.25 (s, 1H);  $^{13}\text{C NMR}$  (100 MHz,  $\text{CDCl}_3$ ):  $\delta$  (ppm) 150.8, 147.7, 137.3, 131.0, 128.4, 124.4, 111.6, 75.6, 37.8; **HRMS** (ESI-TOF)  $m/z$ :  $[\text{M} + \text{H}]^+$  Calcd for  $\text{C}_{10}\text{H}_{10}\text{NO}_3^+$  192.0661; Found 192.0670.

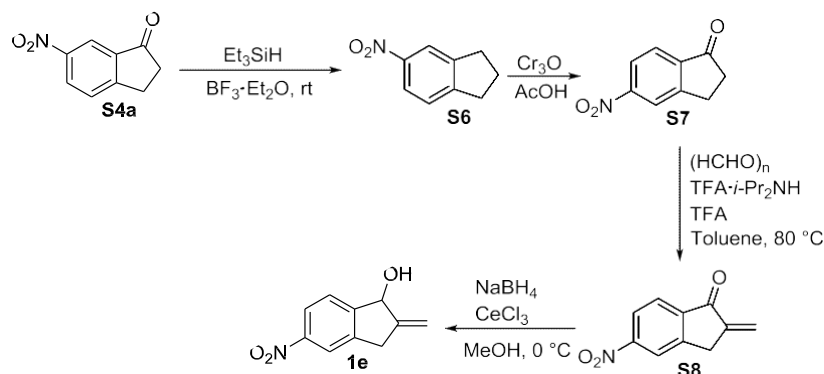

**S4a** (3.54 g, 20.0 mmol, 1.0 equiv) and  $\text{Et}_3\text{SiH}$  (12.7 mL, 79.7 mmol, 4.0 equiv) were added into  $\text{BF}_3 \cdot \text{Et}_2\text{O}$  (48%, 50 mL) at room temperature and the solution was stirred for 8 h. After completion, it was quenched with water (100 mL) and extracted with  $\text{EtOAc}$  ( $2 \times 20$  mL). The organic layer was dried over anhydrous  $\text{Na}_2\text{SO}_4$  and concentrated in vacuo. Crude product **S6** was obtained as a yellow solid and used without further purification.

To a solution of **S6** (0.196 g, 1.20 mmol, 1.0 equiv) in  $\text{AcOH}$  (50 mL) was added  $\text{CrO}_3$  (6.00 g, 60.0 mmol, 5.0 equiv), and the mixture was stirred at 50 °C for 30 h. Then the mixture was poured into water (200 mL) and extracted with  $\text{EtOAc}$  ( $2 \times 50$  mL). The organic layer was dried over anhydrous  $\text{Na}_2\text{SO}_4$ . After concentration, the residue was purified by flash chromatography on silica gel ( $\text{EtOAc}$ /petroleum ether = 1/5) to afford **S7** (0.766 g, 36% yield) as a yellow solid.

To a suspension of **S7** (0.640 g, 3.61 mmol, 1.0 equiv),  $(\text{HCHO})_n$  (0.434 g, 14.5 mmol, 4.0 equiv) and  $\text{TFA} \cdot i\text{-Pr}_2\text{NH}$  (0.744 g, 3.60 mmol, 1.0 equiv) in toluene (30 mL) was added  $\text{TFA}$  (0.030 mL, 0.40 mmol, 0.1 equiv). The mixture was stirred at 80 °C for 6 h. The mixture was cooled to room temperature and filtered through Celite. The cake was washed with  $\text{EtOAc}$  ( $3 \times 10$  mL). The combined filtrates were washed with saturated  $\text{NaHCO}_3$  ( $2 \times 20$  mL), brine ( $2 \times 20$  mL) and dried over anhydrous  $\text{Na}_2\text{SO}_4$ . After concentration, the residue was purified by flash chromatography on silica gel ( $\text{EtOAc}$ /petroleum ether = 1/10) to afford **S8** (0.381 g, 56% yield) as a yellow solid.

$\text{CeCl}_3$  (0.493 g, 2.00 mmol, 1.0 equiv) was added to a stirred solution of **S8** (0.381 g, 2.02 mmol, 1.0 equiv) in  $\text{MeOH}$  (5 mL) at 0 °C. After 15 min,  $\text{NaBH}_4$  (0.0740 g, 1.96 mmol, 1.0 equiv) was added, and the mixture was stirred for 0.2 h. Water (5 mL) was added and the resultant slurry

was filtered through Celite and washed with Et<sub>2</sub>O (15 mL). The combined filtrates were washed with saturated NaHCO<sub>3</sub> (2 × 20 mL), brine (2 × 20 mL) and dried over anhydrous Na<sub>2</sub>SO<sub>4</sub>. After concentration, the residue was purified by flash chromatography on silica gel (EtOAc/petroleum ether = 1/10) to afford **1e** (0.211 g, 55% yield) as a white semisolid.

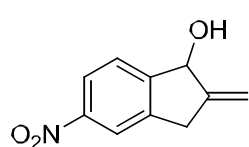

**2-Methylene-5-nitro-2,3-dihydro-1H-inden-1-ol (1e)**: White semisolid; <sup>1</sup>H NMR (400 MHz, CDCl<sub>3</sub>): δ (ppm) 8.13–8.07 (m, 2H), 7.59 (d, *J* = 8.4 Hz, 1H), 5.52 (s, 2H), 5.34 (s, 1H), 3.77–3.67 (m, 2H), 2.38 (s, 1H); <sup>13</sup>C NMR (100 MHz, CDCl<sub>3</sub>): δ (ppm) 151.1, 151.0, 148.4, 142.3, 125.6, 122.8, 120.0, 111.4, 75.7, 36.3; HRMS (ESI-TOF) *m/z*: [M + Na]<sup>+</sup> Calcd for C<sub>10</sub>H<sub>9</sub>NO<sub>3</sub>Na<sup>+</sup> 214.0475; Found 214.0470.

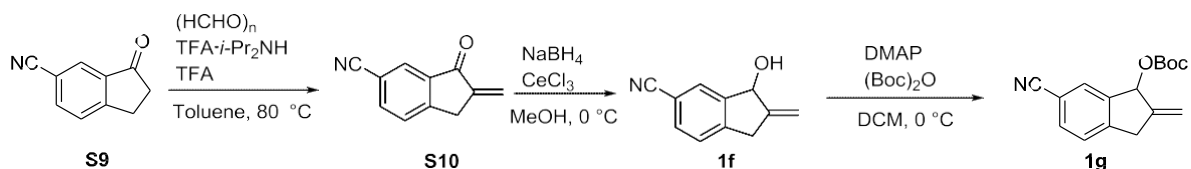

To a suspension of **S9** (0.314 g, 2.00 mmol, 1.0 equiv), (HCHO)<sub>n</sub> (0.240 g, 7.99 mmol, 4.0 equiv) and TFA·*i*-Pr<sub>2</sub>NH (0.430 g, 2.00 mmol, 1.0 equiv) in toluene (10 mL) was added TFA (0.015 mL, 0.20 mmol, 0.1 equiv). The mixture was stirred at 80 °C for 6 h. The mixture was cooled to room temperature and filtered through Celite. The cake was washed with EtOAc (3 × 20 mL), and the combined filtrates were washed with saturated NaHCO<sub>3</sub> (2 × 30 mL), brine (2 × 30 mL) and dried over anhydrous Na<sub>2</sub>SO<sub>4</sub>. After concentration, the residue was purified by flash chromatography on silica gel (EtOAc/petroleum ether = 1/5) to afford **S10** (0.280 g, 83% yield) as a white solid.

CeCl<sub>3</sub> (0.409 g, 1.66 mmol, 1.0 equiv) was added to a stirred solution of **S10** (0.280 g, 1.66 mmol, 1.0 equiv) in MeOH (5 mL) at 0 °C. After 10 min, NaBH<sub>4</sub> (0.614 g, 1.62 mmol, 1.0 equiv) was added, and the mixture was stirred for 0.2 h. Water (5 mL) was added and the resultant slurry was filtered through Celite and washed with Et<sub>2</sub>O (15 mL). The combined filtrates were washed with saturated NaHCO<sub>3</sub> (2 × 20 mL), brine (2 × 20 mL) and dried over anhydrous Na<sub>2</sub>SO<sub>4</sub>. After concentration, the residue was purified by flash chromatography on silica gel (EtOAc/petroleum ether = 1/5) to afford **1f** (0.115 g, 39% yield) as a white solid.

DMAP (4.3 mg, 0.035 mmol, 0.1 equiv) was added to a stirred solution of **1f** (30.0 mg, 0.175 mmol, 1.0 equiv) in DCM (2 mL). (Boc)<sub>2</sub>O (65.0 μL, 0.283 mmol, 1.5 equiv) was added dropwise at 0 °C, and the mixture was stirred for 0.2 h. After completion, the mixture was concentrated and purified by chromatography on silica gel (EtOAc/petroleum ether = 1/15) to afford **1g** (47.1 mg, 99% yield) as a white solid.

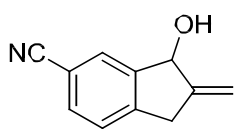

**3-Hydroxy-2-methylene-2,3-dihydro-1H-indene-5-carbonitrile (1f):** White solid, mp: 75–76 °C;  $^1\text{H NMR}$  (400 MHz,  $\text{CDCl}_3$ ):  $\delta$  (ppm) 7.73 (s, 1H), 7.55 (dd,  $J = 8.0, 1.2$  Hz, 1H), 7.36–7.34 (m, 1H), 5.53–5.51 (m, 1H), 5.48 (s, 1H), 5.34–5.32 (m, 1H), 3.79–3.59 (m, 2H), 2.35 (s, 1H);  $^{13}\text{C NMR}$  (100 MHz,  $\text{CDCl}_3$ ):  $\delta$  (ppm) 151.0, 146.3, 145.4, 132.4, 128.9, 125.6, 119.1, 111.4, 110.9, 75.7, 36.8; **HRMS** (ESI-TOF)  $m/z$ :  $[\text{M} + \text{Na}]^+$  Calcd for  $\text{C}_{11}\text{H}_9\text{NONa}^+$  194.0582; Found 194.0584.

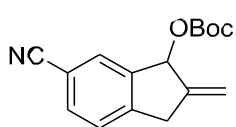

**tert-Butyl (6-cyano-2-methylene-2,3-dihydro-1H-inden-1-yl) carbonate (1g):** White solid, mp: 89–90 °C;  $^1\text{H NMR}$  (600 MHz,  $\text{CDCl}_3$ ):  $\delta$  (ppm) 7.79 (s, 1H), 7.59 (d,  $J = 6.0$  Hz, 1H), 7.36 (d,  $J = 6.0$  Hz, 1H), 6.37 (s, 1H), 5.60 (s, 1H), 5.43 (s, 1H), 3.86 (d,  $J = 18.0$  Hz, 1H), 3.63 (d,  $J = 18.0$  Hz, 1H), 1.53 (s, 9H);  $^{13}\text{C NMR}$  (150 MHz,  $\text{CDCl}_3$ ):  $\delta$  (ppm) 153.5, 148.1, 145.0, 141.4, 133.2, 130.1, 125.7, 118.8, 115.4, 111.1, 83.0, 79.0, 37.0, 27.8; **HRMS** (ESI-TOF)  $m/z$ :  $[\text{M} + \text{Na}]^+$  Calcd for  $\text{C}_{16}\text{H}_{17}\text{NO}_3\text{Na}^+$  294.1101; Found 294.1109.

### 3. Procedure for preparation of ligand L4

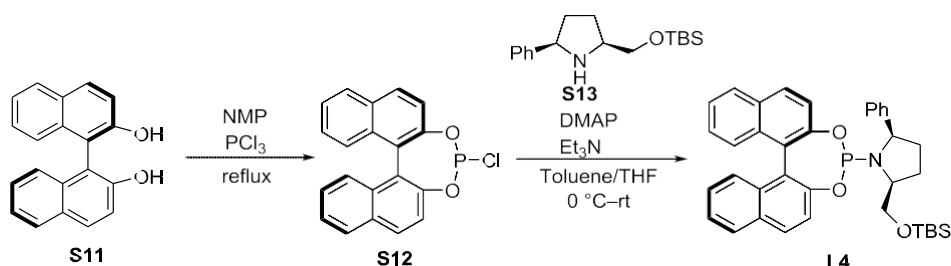

A 25 mL Schlenk flask was charged with **S11** (0.570 g, 1.99 mmol), phosphorus trichloride (1.75 mL, 20.1 mmol, 10.0 equiv) and 1-methyl-2-pyrrolidinone (2.0  $\mu$ L, 0.021 mmol) under argon. The mixture was heated to 90 °C for 30 min, then the volatiles were evaporated under vacuum and further coevaporated with dry toluene three times to afford crude product **S12** as an orange solid and crude product **S12** was used directly in the next step.

A 25 mL round-bottom flask was charged with **S12** (0.292 g, 1.00 mmol, 1.0 equiv), Et<sub>3</sub>N (0.690 mL, 4.97 mmol, 5.0 equiv), DMAP (24.4 mg, 0.200 mmol, 0.2 equiv) and toluene (1 mL). **S13** (0.525 g, 1.50 mmol, 1.5 equiv) was dissolved in THF (1 mL) and the mixture was transferred to the former flask at 0 °C under argon. The mixture was stirred at rt for 6 h. The solid was removed by filtration. The filtrate was concentrated and purified by flash column chromatography (EtOAc/petroleum ether = 1/50) to afford **L4** (0.301 g, 50% yield) as a white semisolid.

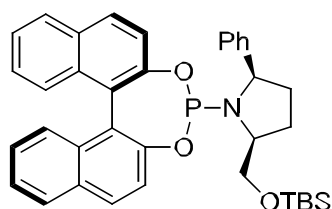

**(2*S*,5*R*)-2-(((*tert*-Butyldimethylsilyloxy)methyl)-1-(dinaphtho[2,1-*d*:1',2'-*f*][1,3,2]dioxaphosphepin-4-yl)-5-phenylpyrrolidine (L4):** White semisolid; <sup>1</sup>H NMR (400 MHz, CDCl<sub>3</sub>):  $\delta$  (ppm) 7.94 (d,  $J$  = 9.2 Hz, 1H), 7.91–7.85 (m, 3H), 7.48 (d,  $J$  = 8.8 Hz, 1H), 7.42–7.40 (m, 6H),

7.36–7.37 (m, 3H), 7.26–7.23 (m, 3H), 4.90–4.83 (m, 1H), 3.65 (dd,  $J$  =

6.0, 4.0 Hz, 1H), 3.31 (t,  $J$  = 9.6 Hz, 1H), 3.20 (s, 1H), 2.32–2.25 (m, 1H), 1.89–1.82 (m, 2H), 1.80–1.76 (m, 1H), 0.53 (s, 9H), –0.32 (s, 3H), –0.57 (s, 3H); <sup>13</sup>C NMR (100 MHz, CDCl<sub>3</sub>):  $\delta$  (ppm) 150.4, 150.3, 149.6, 144.5, 132.80, 132.76, 131.4, 130.8, 130.2, 129.8, 128.4, 128.2, 127.1, 126.6, 126.0, 124.8, 124.5, 122.3, 122.0, 121.5, 65.6, 62.5, 62.3, 60.3, 34.9, 34.8, 28.4, 25.5, 17.8, –5.5, –5.9; HRMS (ESI-TOF)  $m/z$ : [M + H]<sup>+</sup> Calcd for C<sub>37</sub>H<sub>41</sub>NO<sub>3</sub>PSi<sup>+</sup> 606.2593; Found 606.2604.

## 4. Detailed screening conditions for asymmetric [10+n] cycloadditions

**Table S1. Asymmetric [10+2] cycloaddition of allyl *tert*-butyl carbonate **1b** with alkene **2a**<sup>a</sup>**

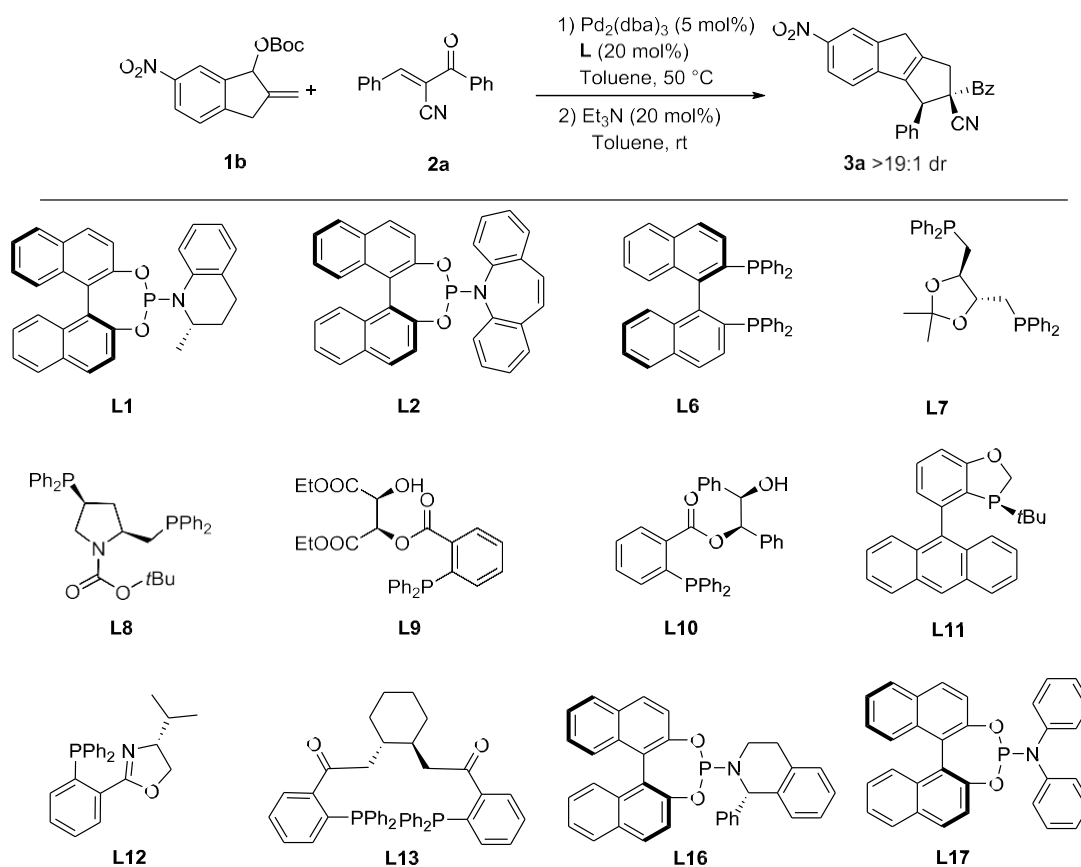

| Entry | L          | Yield of <b>3a</b> (%) <sup>b</sup> | ee of <b>3a</b> (%) <sup>c</sup> |
|-------|------------|-------------------------------------|----------------------------------|
| 1     | <b>L1</b>  | 45                                  | -65                              |
| 2     | <b>L2</b>  | 57                                  | 30                               |
| 3     | <b>L6</b>  | <5                                  | /                                |
| 4     | <b>L7</b>  | 45                                  | 0                                |
| 5     | <b>L8</b>  | 48                                  | -12                              |
| 6     | <b>L9</b>  | 48                                  | -7                               |
| 7     | <b>L10</b> | 47                                  | -17                              |
| 8     | <b>L11</b> | <5                                  | /                                |
| 9     | <b>L12</b> | <5                                  | /                                |
| 10    | <b>L13</b> | <5                                  | /                                |
| 11    | <b>L16</b> | 54                                  | -18                              |
| 12    | <b>L17</b> | 42                                  | -23                              |

<sup>a</sup> Reactions were performed with allylic alcohol **1b** (0.1 mmol), alkene **2a** (0.12 mmol), Pd<sub>2</sub>(dba)<sub>3</sub> (5 mol%) and L (20 mol%) in toluene (1 mL) at 50 °C under Ar for 24 h. After completion, Et<sub>3</sub>N (20 mol%) was added and the mixture was stirred at rt for 2 h. <sup>b</sup> Yield of isolated product. <sup>c</sup> Determined by HPLC analysis on a chiral stationary phase.

**Table S2. Asymmetric [10+2] cycloaddition of allylic alcohol **1c** with alkene **2a**<sup>a</sup>**

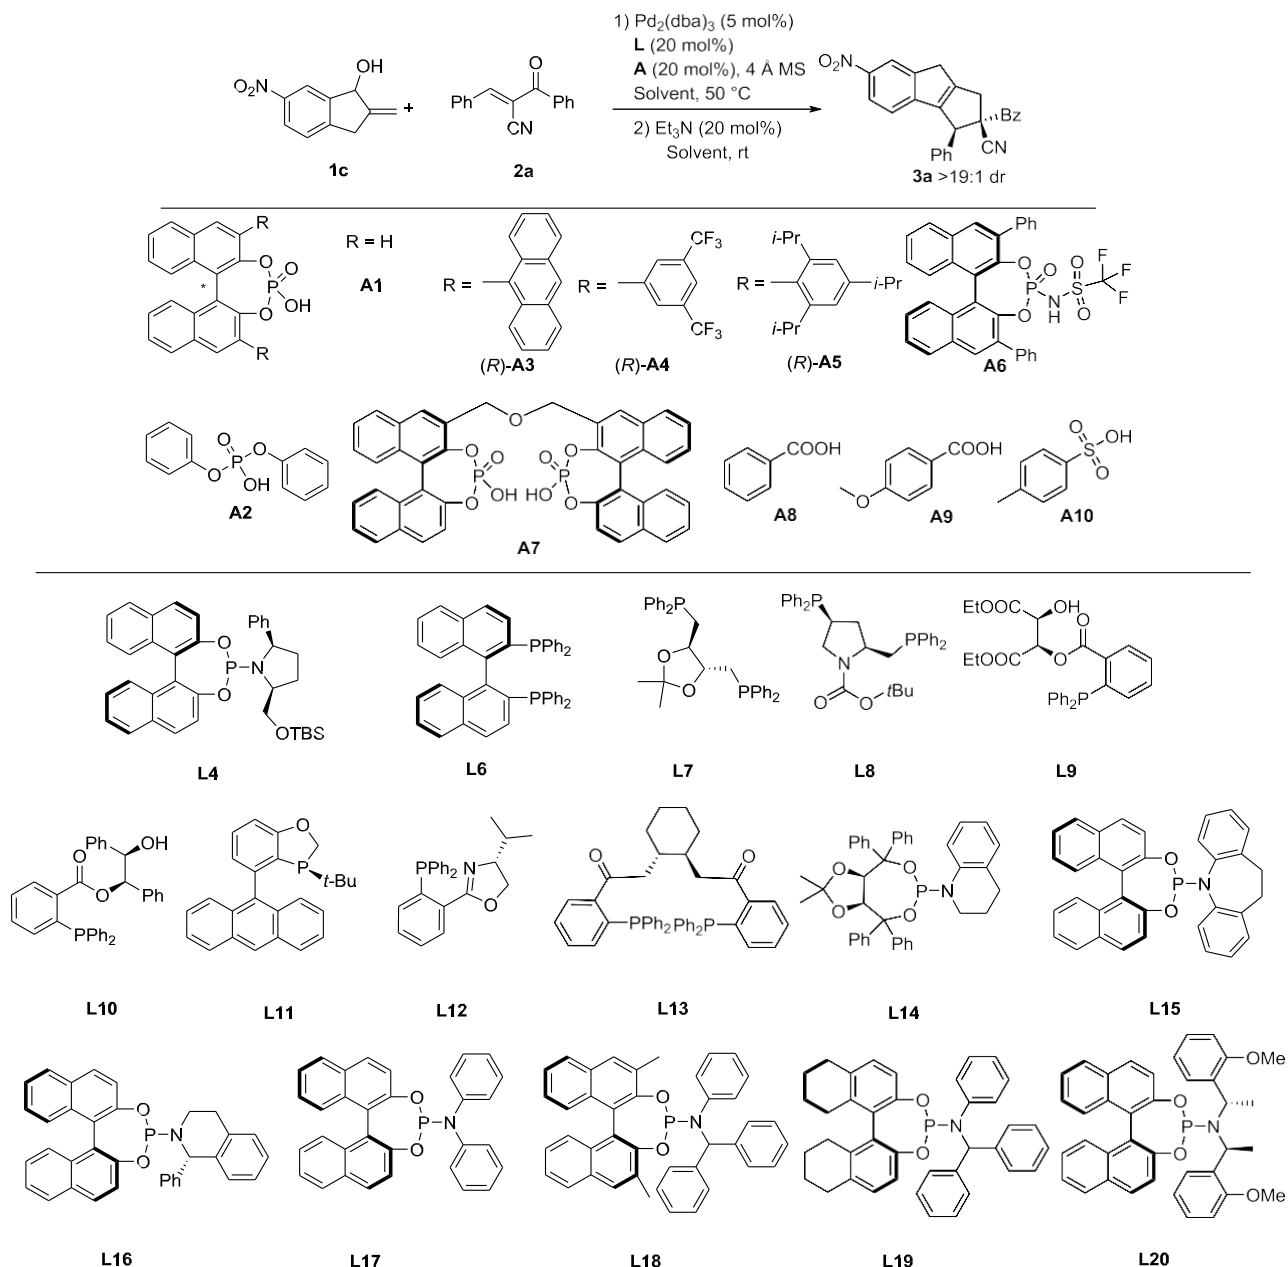

| Entry | Solvent | L                | A                       | Yield of <b>3a</b> (%) <sup>b</sup> | ee of <b>3a</b> (%) <sup>c</sup> |
|-------|---------|------------------|-------------------------|-------------------------------------|----------------------------------|
| 1     | Toluene | PPh <sub>3</sub> | ( <i>R</i> )- <b>A1</b> | 65                                  | -12                              |
| 2     | Toluene | PPh <sub>3</sub> | ( <i>R</i> )- <b>A3</b> | 40                                  | -7                               |
| 3     | Toluene | PPh <sub>3</sub> | ( <i>R</i> )- <b>A4</b> | 30                                  | -8                               |
| 4     | Toluene | PPh <sub>3</sub> | ( <i>R</i> )- <b>A5</b> | 50                                  | -9                               |
| 5     | Toluene | PPh <sub>3</sub> | <b>A6</b>               | <5                                  | /                                |
| 6     | Toluene | PPh <sub>3</sub> | <b>A7</b>               | <5                                  | /                                |
| 7     | Toluene | PPh <sub>3</sub> | /                       | <5                                  | /                                |
| 8     | Toluene | <b>L4</b>        | ( <i>R</i> )- <b>A1</b> | 60                                  | 86                               |
| 9     | Toluene | <b>L6</b>        | ( <i>R</i> )- <b>A1</b> | <5                                  | /                                |
| 10    | Toluene | <b>L7</b>        | ( <i>R</i> )- <b>A1</b> | 40                                  | 0                                |
| 11    | Toluene | <b>L8</b>        | ( <i>R</i> )- <b>A1</b> | 40                                  | -10                              |
| 12    | Toluene | <b>L9</b>        | ( <i>R</i> )- <b>A1</b> | 50                                  | -8                               |

|                   |                   |            |                         |    |     |
|-------------------|-------------------|------------|-------------------------|----|-----|
| 13                | Toluene           | <b>L10</b> | ( <i>R</i> )- <b>A1</b> | 45 | -14 |
| 14                | Toluene           | <b>L11</b> | ( <i>R</i> )- <b>A1</b> | <5 | /   |
| 15                | Toluene           | <b>L12</b> | ( <i>R</i> )- <b>A1</b> | <5 | /   |
| 16                | Toluene           | <b>L13</b> | ( <i>R</i> )- <b>A1</b> | 35 | -15 |
| 17                | Toluene           | <b>L14</b> | ( <i>R</i> )- <b>A1</b> | <5 | /   |
| 18                | Toluene           | <b>L15</b> | ( <i>R</i> )- <b>A1</b> | 60 | 27  |
| 19                | Toluene           | <b>L16</b> | ( <i>R</i> )- <b>A1</b> | 35 | -15 |
| 20                | Toluene           | <b>L17</b> | ( <i>R</i> )- <b>A1</b> | 40 | -28 |
| 21                | Toluene           | <b>L18</b> | ( <i>R</i> )- <b>A1</b> | 30 | 0   |
| 22                | Toluene           | <b>L19</b> | ( <i>R</i> )- <b>A1</b> | 45 | -46 |
| 23                | Toluene           | <b>L20</b> | ( <i>R</i> )- <b>A1</b> | 40 | 18  |
| 24                | Toluene           | <b>L4</b>  | ( <i>S</i> )- <b>A1</b> | 68 | 91  |
| 25                | THF               | <b>L4</b>  | ( <i>S</i> )- <b>A1</b> | 35 | 82  |
| 26                | CHCl <sub>3</sub> | <b>L4</b>  | ( <i>S</i> )- <b>A1</b> | 55 | 85  |
| 27                | DCM               | <b>L4</b>  | ( <i>S</i> )- <b>A1</b> | 52 | 86  |
| 28 <sup>d</sup>   | Toluene           | <b>L4</b>  | ( <i>S</i> )- <b>A1</b> | 70 | 91  |
| 29 <sup>e</sup>   | Toluene           | <b>L4</b>  | ( <i>S</i> )- <b>A1</b> | 72 | 91  |
| 30 <sup>f</sup>   | Toluene           | <b>L4</b>  | ( <i>S</i> )- <b>A1</b> | 72 | 91  |
| 31 <sup>e,g</sup> | Toluene           | <b>L4</b>  | ( <i>S</i> )- <b>A1</b> | 70 | 90  |
| 32 <sup>e,h</sup> | Toluene           | <b>L4</b>  | ( <i>S</i> )- <b>A1</b> | 65 | 91  |
| 33 <sup>e,i</sup> | Toluene           | <b>L4</b>  | ( <i>S</i> )- <b>A1</b> | 68 | 90  |
| 34 <sup>e,j</sup> | Toluene           | <b>L4</b>  | ( <i>S</i> )- <b>A1</b> | 72 | 91  |
| 35 <sup>e</sup>   | Toluene           | <b>L4</b>  | <b>A8</b>               | 70 | 80  |
| 36 <sup>e</sup>   | Toluene           | <b>L4</b>  | <b>A9</b>               | 72 | 80  |
| 37 <sup>e</sup>   | Toluene           | <b>L4</b>  | <b>A10</b>              | <5 | /   |
| 38 <sup>e</sup>   | Toluene           | <b>L4</b>  | TFA                     | <5 | /   |
| 39 <sup>e</sup>   | Toluene           | <b>L4</b>  | <b>A2</b>               | 99 | 91  |

<sup>a</sup> Unless noted otherwise, reactions were performed with allylic alcohol **1c** (0.1 mmol), alkene **2a** (0.12 mmol), Pd<sub>2</sub>(dba)<sub>3</sub> (5 mol%), **L** (20 mol%), **A** (20 mol%) and 4 Å MS (100 mg) in toluene (1 mL) at 50 °C under Ar for 24 h. After completion, Et<sub>3</sub>N (20 mol%) was added and the mixture was stirred at rt for 2 h. <sup>b</sup> Yield of isolated product. <sup>c</sup> Determined by HPLC analysis on a chiral stationary phase. <sup>d</sup> At 40 °C. <sup>e</sup> At 30 °C. <sup>f</sup> At rt for 36 h. <sup>g</sup> With 3 Å MS (100 mg). <sup>h</sup> With 5 Å MS (100 mg). <sup>i</sup> With 4 Å MS (50 mg). <sup>j</sup> With 4 Å MS (150 mg).

**Table S3. Asymmetric [10+2] cycloaddition of allylic alcohol **1c** with alkene **4a**<sup>a</sup>**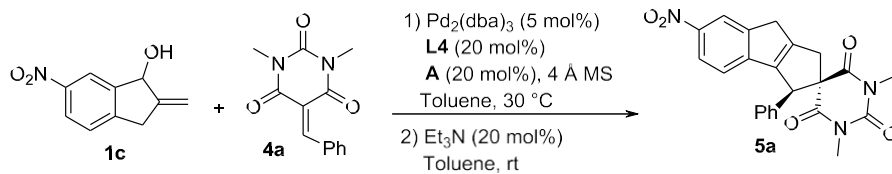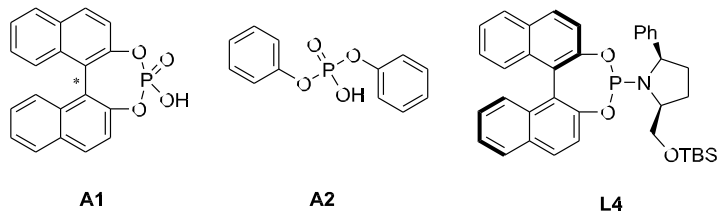

| Entry            | A                       | Solvent           | Yield (%) <sup>b</sup> | ee (%) <sup>c</sup> |
|------------------|-------------------------|-------------------|------------------------|---------------------|
| 1                | ( <i>S</i> )- <b>A1</b> | Toluene           | 65                     | 93                  |
| 2                | ( <i>R</i> )- <b>A1</b> | Toluene           | 73                     | 85                  |
| 3                | ( <i>S</i> )- <b>A1</b> | THF               | 57                     | 80                  |
| 4                | ( <i>S</i> )- <b>A1</b> | CHCl <sub>3</sub> | 60                     | 77                  |
| 5                | ( <i>S</i> )- <b>A1</b> | DCM               | 45                     | 72                  |
| 6 <sup>d</sup>   | ( <i>S</i> )- <b>A1</b> | Toluene           | 62                     | 90                  |
| 7 <sup>e</sup>   | ( <i>S</i> )- <b>A1</b> | Toluene           | 60                     | 88                  |
| 8 <sup>f,g</sup> | <b>A2</b>               | Toluene           | 99                     | 93                  |

<sup>a</sup> Unless noted otherwise, reactions were performed with allylic alcohol **1c** (0.1 mmol), alkene **4a** (0.12 mmol), Pd<sub>2</sub>(dba)<sub>3</sub> (5 mol%), **L4** (20 mol%), **A** (20 mol%) and 4 Å MS (100 mg) in toluene (1 mL) at 30 °C under Ar for 12 h. After completion, Et<sub>3</sub>N (20 mol%) was added and the mixture was stirred at rt for 2 h. <sup>b</sup> Yield of isolated product. <sup>c</sup> Determined by HPLC analysis on a chiral stationary phase. <sup>d</sup> At 40 °C. <sup>e</sup> At 50 °C. <sup>f</sup> At 15 °C. <sup>g</sup> Data in parentheses were obtained with acid **A2** (15 mol%).



**Table S4. Asymmetric [10+4] and [10+2] cycloaddition of allyl *tert*-butyl carbonate **1g** with 2-benzylidenebenzo[*b*]thiophen-3(2*H*)-one **10**<sup>a</sup>**

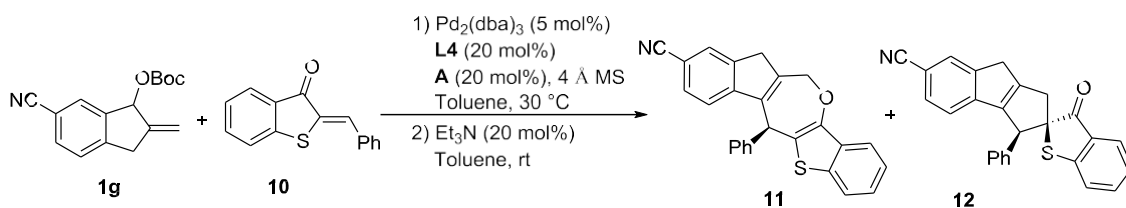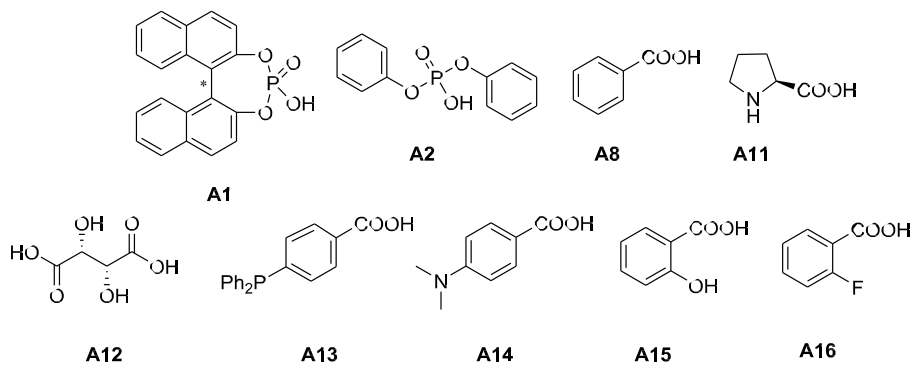

| Entry           | A               | Yield of <b>11</b> (%) <sup>b</sup> | ee of <b>11</b> (%) <sup>c</sup> | Yield of <b>12</b> (%) <sup>b</sup> | ee of <b>12</b> (%) <sup>c</sup> |
|-----------------|-----------------|-------------------------------------|----------------------------------|-------------------------------------|----------------------------------|
| 1               | /               | 60                                  | 61                               | <20                                 | /                                |
| 2               | ( <i>S</i> )-A1 | <5                                  | /                                | <5                                  | /                                |
| 3               | ( <i>R</i> )-A1 | <5                                  | /                                | <5                                  | /                                |
| 4               | A2              | 33                                  | 46                               | <20                                 | /                                |
| 5               | A8              | 54                                  | 87                               | <20                                 | /                                |
| 6               | A11             | 45                                  | 33                               | <20                                 | /                                |
| 7               | A12             | 49                                  | 60                               | <20                                 | /                                |
| 8               | A13             | 60                                  | 65                               | <20                                 | /                                |
| 9               | A14             | 49                                  | 85                               | <20                                 | /                                |
| 10              | A15             | 51                                  | 77                               | <20                                 | /                                |
| 11              | A16             | <20                                 | /                                | 47                                  | 86                               |
| 12 <sup>d</sup> | A8              | <20                                 | /                                | <20                                 | /                                |

<sup>a</sup> Unless noted otherwise, reactions were performed with allylic alcohol **1g** (0.1 mmol), 2-benzylidenebenzo[*b*]thiophen-3(2*H*)-one **10** (0.12 mmol), Pd<sub>2</sub>(dba)<sub>3</sub> (5 mol%), L4 (20 mol%), A (20 mol%) and 4 Å MS (100 mg) in toluene (1 mL) at 30 °C under Ar for 24 h. After completion, Et<sub>3</sub>N (20 mol%) was added and the mixture was stirred at rt for 2 h. <sup>b</sup> Yield of isolated product. <sup>c</sup> Determined by HPLC analysis on a chiral stationary phase. <sup>d</sup> At 15 °C.

## 5. General procedure for asymmetric cycloadditions

### 5.1 Asymmetric [10+2] cycloadditions of allylic alcohol **1** with alkenes **2**

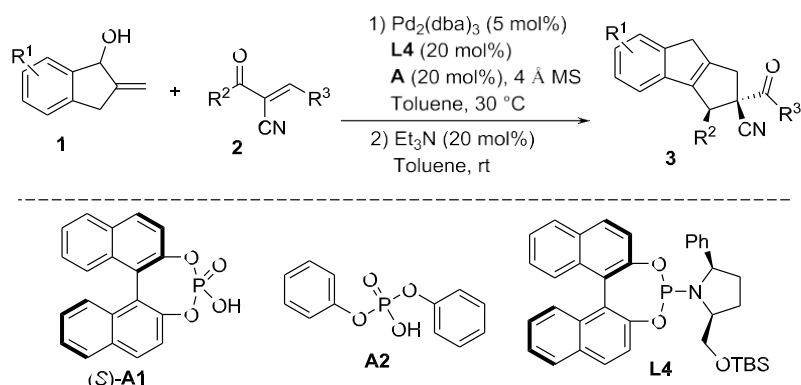

A flame-dried 10 mL Schlenk tube equipped with a magnetic stirring bar was cooled to room temperature. To this flask were added Pd<sub>2</sub>(dba)<sub>3</sub> (0.0050 mmol), **L4** (0.020 mmol), acid **A** (0.020 mmol) and 4 Å MS (100.0 mg), and the flask was evacuated and back-filled three times with argon. Then toluene (0.5 mL) was added by syringe. The mixture was stirred at 30 °C for 10 min. To another dry tube equipped with a magnetic stirring bar were added **1** (0.10 mmol) and **2** (0.12 mmol), evacuated and back-filled three times with argon. Then toluene (0.5 mL) was added by syringe. The mixture was stirred at rt for 5 min. Then the latter solution was added to the first Schlenk tube by syringe. The mixture was stirred at 30 °C for 2–24 h. After completion, Et<sub>3</sub>N (0.020 mmol) was added to the mixture and stirred at rt for 0.5–2 h. After completion, the solvent was evaporated in vacuo. The residue was purified by flash chromatography on silica gel (EtOAc/petroleum ether) to give the product.

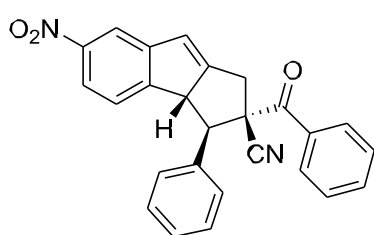

**Synthesis of 3a'**: A flame-dried 10 mL Schlenk tube equipped with a magnetic stirring bar was cooled to room temperature. To this flask were added Pd<sub>2</sub>(dba)<sub>3</sub> (4.6 mg, 0.0050 mmol, 0.05 equiv), **L4** (12.1 mg, 0.0200 mmol, 0.2 equiv), **A2** (5.0 mg, 0.020 mmol, 0.2 equiv) and 4 Å MS (100.0 mg), and the flask was evacuated and back-filled three times with argon. Then toluene (0.5 mL) was added by syringe. The mixture was stirred at 30 °C for 10 min. To another dry tube equipped with a magnetic stirring bar were added 2-methylene-6-nitro-2,3-dihydro-1*H*-inden-1-ol **1c** (19.1 mg, 0.100 mmol, 1.0 equiv) and (*E*)-2-benzoyl-3-phenylacrylonitrile **2a** (28.0 mg, 0.120 mmol, 1.2 equiv), evacuated and back-filled three times with argon. Then toluene (0.5 mL) was added by syringe. The mixture was stirred at rt for 5 min. Then the latter solution was added to the first Schlenk tube by syringe. The mixture was stirred at 30 °C for 2 h. After completion, the solvent was evaporated in vacuo. The residue was purified by flash chromatography on silica gel (EtOAc/petroleum ether = 1/8) to give product **3a'**:

40.4 mg, 99% yield, as a yellow solid; mp: 111–113 °C;  $[\alpha]_{\text{D}}^{25} = +76.5$  ( $c = 1.5$  in  $\text{CHCl}_3$ ); >19:1 dr; 93% ee, determined by HPLC analysis [Chiralpak IA, *n*-hexane/*i*-PrOH = 80/20, 1.0 mL min<sup>-1</sup>,  $\lambda = 254$  nm,  $t$  (minor) = 15.34 min,  $t$  (major) = 18.27 min]; <sup>1</sup>H NMR (400 MHz, CDCl<sub>3</sub>):  $\delta$  (ppm) 8.12 (d,  $J = 2.4$  Hz, 1H), 7.93–7.85 (m, 3H), 7.64 (dd,  $J = 7.6, 2.4$  Hz, 2H), 7.59 (t,  $J = 7.6$  Hz, 1H), 7.48–7.38 (m, 5H), 7.01 (d,  $J = 8.0$  Hz, 1H), 6.64 (s, 1H), 4.70 (d,  $J = 13.6$  Hz, 1H), 3.88 (dd,  $J = 17.2, 2.4$  Hz, 1H), 3.64 (d,  $J = 13.6$  Hz, 1H), 3.40 (d,  $J = 17.2$  Hz, 1H); <sup>13</sup>C NMR (100 MHz, CDCl<sub>3</sub>):  $\delta$  (ppm) 191.0, 154.4, 149.6, 148.9, 148.3, 135.2, 134.3, 133.6, 129.5, 129.3, 128.91, 128.88, 123.8, 123.77, 123.75, 120.4, 120.1, 116.1, 62.9, 57.5, 52.2, 38.6; HRMS (ESI-TOF)  $m/z$ :  $[\text{M} + \text{Na}]^+$  Calcd for C<sub>26</sub>H<sub>18</sub>N<sub>2</sub>O<sub>3</sub>Na<sup>+</sup> 429.1210; Found 429.1218.

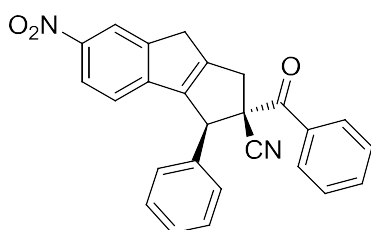

**Synthesis of 3a:** A flame-dried 10 mL Schlenk tube equipped with a magnetic stirring bar was cooled to room temperature. To this flask were added Pd<sub>2</sub>(dba)<sub>3</sub> (4.6 mg, 0.0050 mmol, 0.05 equiv), **L4** (12.1 mg, 0.0200 mmol, 0.2 equiv), **A2** (5.0 mg, 0.020 mmol, 0.2 equiv) and 4 Å MS (100.0 mg), and the flask was evacuated and back-filled three times with argon. Then toluene (0.5 mL) was added by syringe. The mixture was stirred at 30 °C for 10 min. To another dry tube equipped with a magnetic stirring bar were added 2-methylene-6-nitro-2,3-dihydro-1*H*-inden-1-ol **1c** (19.1 mg, 0.100 mmol, 1.0 equiv) and (*E*)-2-benzoyl-3-phenylacrylonitrile **2a** (28.0 mg, 0.120 mmol, 1.2 equiv), evacuated and back-filled three times with argon. Then toluene (0.5 mL) was added by syringe. The mixture was stirred at rt for 5 min. Then the latter solution was added to the first Schlenk tube by syringe. The mixture was stirred at 30 °C for 2 h. After completion, Et<sub>3</sub>N (2.8 μL, 0.020 mmol, 0.2 equiv) was added to the reaction mixture and stirred at rt for 2 h. After completion, the solvent was evaporated in vacuo. The residue was purified by flash chromatography on silica gel (EtOAc/petroleum ether = 1/8) to give product **3a**: 40.1 mg, 99% yield, as a yellow solid; mp: 124–125 °C;  $[\alpha]_{\text{D}}^{25} = +107.5$  ( $c = 1.5$  in  $\text{CHCl}_3$ ); >19:1 dr; 91% ee, determined by HPLC analysis [Chiralpak IA, *n*-hexane/*i*-PrOH = 80/20, 1.0 mL min<sup>-1</sup>,  $\lambda = 254$  nm,  $t$  (minor) = 12.03 min,  $t$  (major) = 14.91 min]; <sup>1</sup>H NMR (400 MHz, CDCl<sub>3</sub>):  $\delta$  (ppm) 8.27 (d,  $J = 2.0$  Hz, 1H), 8.19–8.10 (m, 2H), 8.03 (dd,  $J = 8.4, 2.0$  Hz, 1H), 7.66 (t,  $J = 7.2$  Hz, 1H), 7.56–7.50 (m, 2H), 7.44–7.36 (m, 3H), 7.34–7.26 (m, 2H), 6.81 (d,  $J = 8.4$  Hz, 1H), 5.18 (s, 1H), 3.82 (d,  $J = 18.8$  Hz, 1H), 3.74–3.59 (m, 2H), 3.51 (dd,  $J = 22.8, 2.8$  Hz, 1H); <sup>13</sup>C NMR (100 MHz, CDCl<sub>3</sub>):  $\delta$  (ppm) 190.6, 153.3, 148.4, 146.2, 145.8, 145.5, 136.0, 134.4, 132.8, 130.0, 129.1, 129.0, 128.93, 128.91, 123.2, 119.7, 119.5, 119.3, 62.4, 53.8, 41.8, 35.7; HRMS (ESI-TOF)  $m/z$ :  $[\text{M} + \text{H}]^+$  Calcd for C<sub>26</sub>H<sub>18</sub>N<sub>2</sub>O<sub>3</sub>Na<sup>+</sup> 429.1210; Found 429.1208.

**Synthesis of 3b:** A flame-dried 10 mL Schlenk tube equipped with a magnetic stirring bar was cooled to room temperature. To this flask were added Pd<sub>2</sub>(dba)<sub>3</sub> (4.6 mg, 0.0050 mmol, 0.05 equiv),

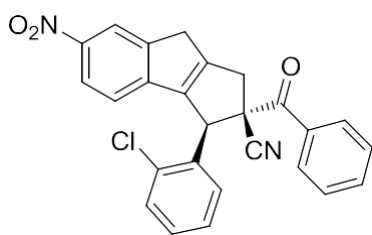

**L4** (12.1 mg, 0.0200 mmol, 0.2 equiv), **A2** (5.0 mg, 0.020 mmol, 0.2 equiv) and 4 Å MS (100.0 mg), and the flask was evacuated and back-filled three times with argon. Then toluene (0.5 mL) was added by syringe. The mixture was stirred at 30 °C for 10 min. To another dry tube equipped with a magnetic stirring bar were added 2-methylene-6-nitro-2,3-dihydro-1*H*-inden-1-ol **1c** (19.1 mg, 0.100 mmol, 1.0 equiv) and (*E*)-2-benzoyl-3-(2-chlorophenyl)acrylonitrile **2b** (32.0 mg, 0.120 mmol, 1.2 equiv), evacuated and back-filled three times with argon. Then toluene (0.5 mL) was added by syringe. The mixture was stirred at rt for 5 min. Then the latter solution was added to the first Schlenk tube by syringe. The mixture was stirred at 30 °C for 2 h. After completion, Et<sub>3</sub>N (2.8 μL, 0.020 mmol, 0.2 equiv) was added to the reaction mixture and stirred at rt for 2 h. After completion, the solvent was evaporated in vacuo. The residue was purified by flash chromatography on silica gel (EtOAc/petroleum ether = 1/8) to give product **3b**: 42.1 mg, 96% yield, as a yellow solid; mp: 130–131 °C;  $[\alpha]_{\text{D}}^{25} = +95.2$  ( $c = 1.8$  in CHCl<sub>3</sub>); >19:1 dr; 93% ee, determined by HPLC analysis [Chiralpak IA, *n*-hexane/*i*-PrOH = 80/20, 1.0 mL min<sup>-1</sup>, λ = 254 nm, t (major) = 15.33 min, t (minor) = 16.96 min]; **<sup>1</sup>H NMR** (400 MHz, CDCl<sub>3</sub>): δ (ppm) 8.29 (d,  $J = 2.0$  Hz, 1H), 8.13–8.04 (m, 3H), 7.64 (t,  $J = 7.4$  Hz, 1H), 7.55–7.48 (m, 3H), 7.33 (td,  $J = 7.6, 1.6$  Hz, 1H), 7.24 (td,  $J = 7.6, 1.6$  Hz, 1H), 7.11 (dd,  $J = 8.0, 2.0$  Hz, 1H), 6.94 (d,  $J = 8.0$  Hz, 1H), 5.81 (s, 1H), 3.77 (s, 2H), 3.64 (d,  $J = 23.6$  Hz, 1H), 3.51 (dd,  $J = 22.8, 2.8$  Hz, 1H); **<sup>13</sup>C NMR** (100 MHz, CDCl<sub>3</sub>): δ (ppm) 190.7, 153.4, 148.4, 146.5, 145.7, 145.5, 134.8, 134.3, 134.2, 132.7, 130.2, 130.0, 129.9, 129.8, 128.8, 127.4, 123.3, 119.6, 119.5, 119.4, 60.8, 50.3, 42.8, 35.8; **HRMS** (ESI-TOF)  $m/z$ :  $[M + Na]^+$  Calcd for C<sub>26</sub>H<sub>17</sub>ClN<sub>2</sub>O<sub>3</sub>Na<sup>+</sup> 463.0825 (<sup>35</sup>Cl) and 465.0796 (<sup>37</sup>Cl); Found 463.0822 (<sup>35</sup>Cl) and 465.0800 (<sup>37</sup>Cl).

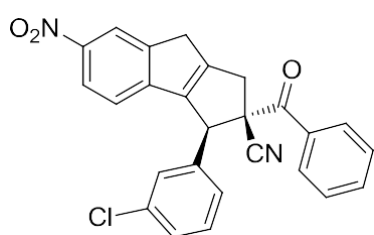

**Synthesis of 3c:** A flame-dried 10 mL Schlenk tube equipped with a magnetic stirring bar was cooled to room temperature. To this flask were added Pd<sub>2</sub>(dba)<sub>3</sub> (4.6 mg, 0.0050 mmol, 0.05 equiv), **L4** (12.1 mg, 0.0200 mmol, 0.2 equiv), (*S*)-**A1** (7.0 mg, 0.020 mmol, 0.2 equiv) and 4 Å MS (100.0 mg), and the flask was evacuated and back-filled three times with argon. Then toluene (0.5 mL) was added by syringe. The mixture was stirred at rt for 10 min. To another dry tube equipped with a magnetic stirring bar were added 2-methylene-6-nitro-2,3-dihydro-1*H*-inden-1-ol **1c** (19.1 mg, 0.100 mmol, 1.0 equiv), (*E*)-2-benzoyl-3-(3-chlorophenyl)acrylonitrile **2c** (32.0 mg, 0.120 mmol, 1.2 equiv), evacuated and back-filled three times with argon. Then toluene (0.5 mL) was added by syringe. The mixture was stirred at rt for 5 min. Then the latter solution was added to the first Schlenk tube by syringe. The mixture was stirred at 30 °C for 2 h. After completion, Et<sub>3</sub>N (2.8 μL, 0.020 mmol, 0.2 equiv) was

added to the reaction mixture and stirred at rt for 2 h. After completion, the solvent was evaporated in vacuo. The residue was purified by flash chromatography on silica gel (EtOAc/petroleum ether = 1/8) to give product **3c**: 35.2 mg, 80% yield, as a yellow solid; mp: 122–123 °C;  $[\alpha]_{\text{D}}^{25} = +82.7$  ( $c = 1.7$  in  $\text{CHCl}_3$ ); >19:1 dr; 92% ee, determined by HPLC analysis [Chiralpak IA, *n*-hexane/*i*-PrOH = 80/20, 1.0 mL min<sup>-1</sup>,  $\lambda = 254$  nm,  $t$  (minor) = 12.75 min,  $t$  (major) = 15.10 min]; <sup>1</sup>H NMR (400 MHz, CDCl<sub>3</sub>):  $\delta$  (ppm) 8.29 (d,  $J = 2.0$  Hz, 1H), 8.20–8.09 (m, 2H), 8.07 (dd,  $J = 8.4, 2.4$  Hz, 1H), 7.68 (t,  $J = 7.6$  Hz, 1H), 7.59–7.51 (m, 2H), 7.42–7.32 (m, 2H), 7.31–7.29 (m, 1H), 7.20 (dt,  $J = 6.8, 1.6$  Hz, 1H), 6.85 (d,  $J = 8.4$  Hz, 1H), 5.25 (s, 1H), 3.75 (s, 1H), 3.66 (d,  $J = 24.0$  Hz, 1H), 3.50 (dd,  $J = 23.2, 3.6$  Hz, 1H); <sup>13</sup>C NMR (100 MHz, CDCl<sub>3</sub>):  $\delta$  (ppm) 190.2, 153.4, 148.3, 145.7, 145.6, 145.5, 138.1, 135.0, 134.6, 132.7, 130.4, 130.0, 129.2, 129.1, 129.0, 127.3, 123.3, 119.6, 119.4, 119.3, 62.4, 52.8, 42.1, 35.8; HRMS (ESI-TOF)  $m/z$ :  $[\text{M} + \text{H}]^+$  Calcd for  $\text{C}_{26}\text{H}_{18}\text{ClN}_2\text{O}_3^+$  441.1006 (<sup>35</sup>Cl) and 443.0976 (<sup>37</sup>Cl); Found 441.1000 (<sup>35</sup>Cl) and 443.0976 (<sup>37</sup>Cl).

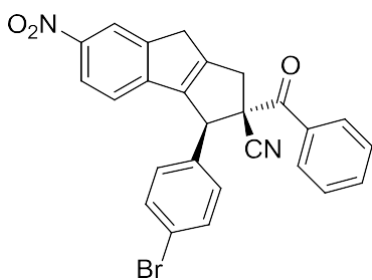

**Synthesis of 3d:** A flame-dried 10 mL Schlenk tube equipped with a magnetic stirring bar was cooled to room temperature. To this flask were added Pd<sub>2</sub>(dba)<sub>3</sub> (4.6 mg, 0.0050 mmol, 0.05 equiv), **L4** (12.1 mg, 0.0200 mmol, 0.2 equiv), **A2** (5.0 mg, 0.020 mmol, 0.2 equiv) and 4 Å MS (100.0 mg), and the flask was evacuated and back-filled three times with argon. Then toluene (0.5 mL) was added by syringe.

The mixture was stirred at 30 °C for 10 min. To another dry tube equipped with a magnetic stirring bar were added 2-methylene-6-nitro-2,3-dihydro-1*H*-inden-1-ol **1c** (19.1 mg, 0.100 mmol, 1.0 equiv) and (*E*)-2-benzoyl-3-(4-bromophenyl)acrylonitrile **2d** (37.3 mg, 0.120 mmol, 1.2 equiv), evacuated and back-filled three times with argon. Then toluene (0.5 mL) was added by syringe. The mixture was stirred at rt for 5 min. Then the latter solution was added to the first Schlenk tube by syringe. The mixture was stirred at 30 °C for 12 h. After completion, Et<sub>3</sub>N (2.8 μL, 0.020 mmol, 0.2 equiv) was added to the reaction mixture and stirred at rt for 2 h. After completion, the solvent was evaporated in vacuo. The residue was purified by flash chromatography on silica gel (EtOAc/petroleum ether = 1/8) to give product **3d**: 32.5 mg, 67% yield, as a yellow solid; mp 118–119 °C;  $[\alpha]_{\text{D}}^{25} = +86.6$  ( $c = 1.5$  in  $\text{CHCl}_3$ ); >19:1 dr; 89% ee, determined by HPLC analysis [Chiralpak IA, *n*-hexane/*i*-PrOH = 80/20, 1.0 mL min<sup>-1</sup>,  $\lambda = 254$  nm,  $t$  (minor) = 13.89 min,  $t$  (major) = 20.92 min]; <sup>1</sup>H NMR (400 MHz, CDCl<sub>3</sub>):  $\delta$  (ppm) 8.29 (d,  $J = 2.0$  Hz, 1H), 8.16–8.06 (m, 2H), 8.06 (dd,  $J = 8.4, 2.0$  Hz, 1H), 7.70–7.67 (m, 1H), 7.66–7.52 (m, 4H), 7.19 (d,  $J = 8.4$  Hz, 2H), 6.82 (d,  $J = 8.4$  Hz, 1H), 5.25 (d,  $J = 1.2$  Hz, 1H), 3.74 (s, 2H), 3.68–3.47 (m, 2H); <sup>13</sup>C NMR (100 MHz, CDCl<sub>3</sub>):  $\delta$  (ppm) 190.3, 153.3, 148.3, 145.8, 145.6, 145.5, 135.0, 134.6, 132.7, 132.3, 130.8, 130.0, 129.0, 123.2, 123.0, 119.6, 119.5, 119.3, 62.5, 52.8, 42.1, 35.8; HRMS (ESI-TOF)  $m/z$ :  $[\text{M} + \text{H}]^+$

Calcd for  $C_{26}H_{18}BrN_2O_3^+$  485.0501 ( $^{79}Br$ ) and 487.0480 ( $^{81}Br$ ); Found 485.0509 ( $^{79}Br$ ) and 487.0473 ( $^{81}Br$ ).

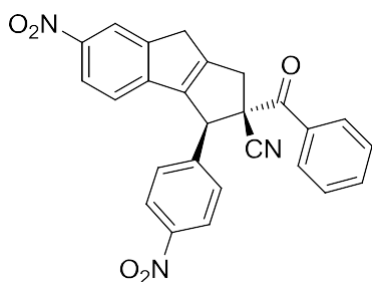

**Synthesis of 3e:** A flame-dried 10 mL Schlenk tube equipped with a magnetic stirring bar was cooled to room temperature. To this flask were added  $Pd_2(dba)_3$  (4.6 mg, 0.0050 mmol, 0.05 equiv), **L4** (12.1 mg, 0.0200 mmol, 0.2 equiv), (*S*)-**A1** (7.0 mg, 0.020 mmol, 0.2 equiv) and 4 Å MS (100.0 mg), and the flask was evacuated and back-filled three times with argon. Then toluene (0.5 mL) was added

by syringe. The mixture was stirred at 30 °C for 10 min. To another dry tube equipped with a magnetic stirring bar were added 2-methylene-6-nitro-2,3-dihydro-1*H*-inden-1-ol **1c** (19.1 mg, 0.100 mmol, 1.0 equiv) and (*E*)-2-benzoyl-3-(4-nitrophenyl)acrylonitrile **2e** (33.4 mg, 0.120 mmol, 1.2 equiv), evacuated and back-filled three times with argon. Then toluene (0.5 mL) was added by syringe. The mixture was stirred at rt for 5 min. Then the latter solution was added to the first Schlenk tube by syringe. The mixture was stirred at 30 °C for 24 h. After completion,  $Et_3N$  (2.8  $\mu$ L, 0.020 mmol, 0.2 equiv) was added to the reaction mixture and stirred at rt for 2 h. After completion, the solvent was evaporated in vacuo. The residue was purified by flash chromatography on silica gel (EtOAc/petroleum ether = 1/7) to give product **3e**: 31.5 mg, 70% yield, as a yellow solid; mp: 121–122 °C;  $[\alpha]_D^{25} = +93.9$  ( $c = 1.6$  in  $CHCl_3$ ); >19:1 dr; 90% ee, determined by HPLC analysis [Chiralpak IA, *n*-hexane/*i*-PrOH = 60/40, 1.0 mL  $min^{-1}$ ,  $\lambda = 254$  nm,  $t$  (minor) = 12.47 min,  $t$  (major) = 19.31 min];  $^1H$  NMR (400 MHz,  $CDCl_3$ ):  $\delta$  (ppm) 8.31 (d,  $J = 2.0$  Hz, 1H), 8.29–8.25 (m, 2H), 8.19–8.14 (m, 2H), 8.08 (dd,  $J = 8.4, 2.0$  Hz, 1H), 7.70 (t,  $J = 7.4$  Hz, 1H), 7.65–7.46 (m, 4H), 6.82 (d,  $J = 8.4$  Hz, 1H), 5.55 (s, 1H), 3.86 (d,  $J = 17.6$  Hz, 1H), 3.79–3.63 (m, 2H), 3.52 (dd,  $J = 23.2, 3.2$  Hz, 1H);  $^{13}C$  NMR (100 MHz,  $CDCl_3$ ):  $\delta$  (ppm) 189.8, 153.5, 148.3, 148.1, 145.8, 145.3, 145.1, 143.5, 134.8, 132.5, 130.2, 130.0, 129.1, 124.2, 123.3, 119.8, 119.3, 119.1, 62.7, 52.2, 42.5, 35.9; HRMS (ESI-TOF)  $m/z$ :  $[M + Na]^+$  Calcd for  $C_{26}H_{17}N_3O_5Na^+$  474.1066; Found 474.1057.

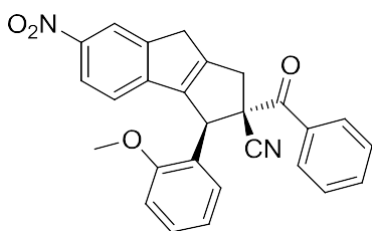

**Synthesis of 3f:** A flame-dried 10 mL Schlenk tube equipped with a magnetic stirring bar was cooled to room temperature. To this flask were added  $Pd_2(dba)_3$  (4.6 mg, 0.0050 mmol, 0.05 equiv), **L4** (12.1 mg, 0.0200 mmol, 0.2 equiv), **A2** (5.0 mg, 0.020 mmol, 0.2 equiv) and 4 Å MS (100.0 mg), and the flask was evacuated and back-filled

three times with argon. Then toluene (0.5 mL) was added by syringe. The mixture was stirred at 30 °C for 10 min. To another dry tube equipped with a magnetic stirring bar were added 2-methylene-6-nitro-2,3-dihydro-1*H*-inden-1-ol **1c** (19.1 mg, 0.100 mmol, 1.0 equiv) and

(*E*)-2-benzoyl-3-(2-methoxyphenyl)acrylonitrile **2f** (31.6 mg, 0.120 mmol, 1.2 equiv), evacuated and back-filled three times with argon. Then toluene (0.5 mL) was added by syringe. The mixture was stirred at rt for 5 min. Then the latter solution was added to the first Schlenk tube by syringe. The mixture was stirred at 30 °C for 2 h. After completion, Et<sub>3</sub>N (2.8 μL, 0.020 mmol, 0.2 equiv) was added to the reaction mixture and stirred at rt for 2 h. After completion, the solvent was evaporated in vacuo. The residue was purified by flash chromatography on silica gel (EtOAc/petroleum ether = 1/8) to give product **3f**: 43.2 mg, 99% yield, as a yellow solid; mp: 120–121 °C;  $[\alpha]_D^{25} = +88.5$  ( $c = 1.6$  in CHCl<sub>3</sub>); >19:1 dr; 95% ee, determined by HPLC analysis [Chiralpak IA, *n*-hexane/*i*-PrOH = 80/20, 1.0 mL min<sup>-1</sup>, λ = 254 nm, t (major) = 12.24 min, t (minor) = 16.42 min]; <sup>1</sup>H NMR (400 MHz, CDCl<sub>3</sub>): δ (ppm) 8.28 (s, 1H), 8.11–8.03 (m, 3H), 7.63 (t, *J* = 7.4 Hz, 1H), 7.55–7.45 (m, 2H), 7.42–7.32 (m, 1H), 7.05 (s, 1H), 6.98–6.91 (m, 3H), 5.60 (s, 1H), 3.95–3.56 (m, 6H), 3.51 (dd, *J* = 23.2, 3.2 Hz, 1H); <sup>13</sup>C NMR (100 MHz, CDCl<sub>3</sub>): δ (ppm) 191.9, 157.4, 153.9, 148.5, 146.3, 145.4, 133.9, 133.4, 130.1, 129.6, 128.7, 124.5, 123.2, 120.9, 120.1, 119.5, 110.8, 61.9, 55.1, 48.3, 42.5, 35.8; HRMS (ESI-TOF) *m/z*: [M + Na]<sup>+</sup> Calcd for C<sub>27</sub>H<sub>20</sub>N<sub>2</sub>O<sub>4</sub>Na<sup>+</sup> 459.1321; Found 459.1327.

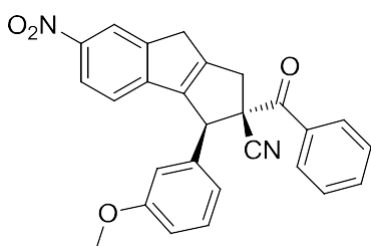

**Synthesis of 3g:** A flame-dried 10 mL Schlenk tube equipped with a magnetic stirring bar was cooled to room temperature. To this flask were added Pd<sub>2</sub>(dba)<sub>3</sub> (4.6 mg, 0.0050 mmol, 0.05 equiv), **L4** (12.1 mg, 0.0200 mmol, 0.2 equiv), (*S*)-**A1** (7.0 mg, 0.020 mmol, 0.2 equiv) and 4 Å MS (100.0 mg), and the flask was evacuated and back-filled three times with argon. Then toluene (0.5 mL) was added by syringe. The mixture was stirred at rt for 10 min. To another dry tube equipped with a magnetic stirring bar were added 2-methylene-6-nitro-2,3-dihydro-1*H*-inden-1-ol **1c** (19.1 mg, 0.100 mmol, 1.0 equiv) and (*E*)-2-benzoyl-3-(3-methoxyphenyl)acrylonitrile **2g** (31.6 mg, 0.120 mmol, 1.2 equiv), evacuated and back-filled three times with argon. Then toluene (0.5 mL) was added by syringe. The mixture was stirred at rt for 5 min. Then the latter solution was added to the first Schlenk tube by syringe. The mixture was stirred at 30 °C for 12 h. After completion, Et<sub>3</sub>N (2.8 μL, 0.020 mmol, 0.2 equiv) was added to the reaction mixture and stirred at rt for 2 h. After completion, the solvent was evaporated in vacuo. The residue was purified by flash chromatography on silica gel (EtOAc/petroleum ether = 1/7) to give product **3g**: 32.7 mg, 75% yield, as a yellow solid; mp: 126–127 °C;  $[\alpha]_D^{25} = +84.4$  ( $c = 1.6$  in CHCl<sub>3</sub>); >19:1 dr; 93% ee, determined by HPLC analysis [Chiralpak IA, *n*-hexane/*i*-PrOH = 80/20, 1.0 mL min<sup>-1</sup>, λ = 254 nm, t (minor) = 14.03 min, t (major) = 15.44 min]; <sup>1</sup>H NMR (400 MHz, CDCl<sub>3</sub>): δ (ppm) 8.35 (d, *J* = 2.0 Hz, 1H), 8.18–8.14 (m, 2H), 8.04 (dd, *J* = 8.0, 2.8 Hz, 1H), 7.66 (t, *J* = 7.4 Hz, 1H), 7.56–7.50 (m, 2H), 7.35–7.31 (m, 1H),

6.92 (dd,  $J = 8.3, 2.6$  Hz, 1H), 6.90–6.82 (m, 3H), 5.12 (s, 1H), 3.85–3.75 (m, 4H), 3.86–3.77 (m, 4H), 3.72–3.58 (m, 2H), 3.50 (dd,  $J = 23.2, 3.2$  Hz, 1H);  $^{13}\text{C}$  NMR (100 MHz,  $\text{CDCl}_3$ ):  $\delta$  (ppm) 190.5, 160.0, 153.4, 148.3, 146.1, 145.8, 145.4, 137.5, 134.4, 132.7, 130.1, 130.0, 128.9, 123.2, 121.3, 119.6, 119.5, 119.3, 115.2, 113.7, 62.3, 55.3, 53.8, 41.8, 35.7; **HRMS** (ESI-TOF)  $m/z$ :  $[\text{M} + \text{Na}]^+$  Calcd for  $\text{C}_{27}\text{H}_{20}\text{N}_2\text{O}_4\text{Na}^+$  459.1321; Found 459.1312.

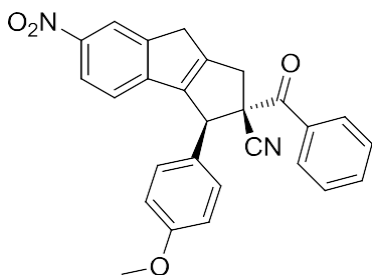

**Synthesis of 3h:** A flame-dried 10 mL Schlenk tube equipped with a magnetic stirring bar was cooled to room temperature. To this flask were added  $\text{Pd}_2(\text{dba})_3$  (4.6 mg, 0.0050 mmol, 0.05 equiv), **L4** (12.1 mg, 0.0200 mmol, 0.2 equiv), **A2** (5.0 mg, 0.020 mmol, 0.2 equiv) and 4 Å MS (100.0 mg), and the flask was evacuated and back-filled three times with argon. Then toluene (0.5 mL) was added by syringe.

The mixture was stirred at 30 °C for 10 min. To another dry tube equipped with a magnetic stirring bar were added 2-methylene-6-nitro-2,3-dihydro-1*H*-inden-1-ol **1c** (19.1 mg, 0.100 mmol, 1.0 equiv) and (*E*)-2-benzoyl-3-(4-methoxyphenyl)acrylonitrile **2h** (31.6 mg, 0.120 mmol, 1.2 equiv), evacuated and back-filled three times with argon. Then toluene (0.5 mL) was added by syringe. The mixture was stirred at rt for 5 min. Then the latter solution was added to the first Schlenk tube by syringe. The mixture was stirred at 30 °C for 2 h. After completion,  $\text{Et}_3\text{N}$  (2.8  $\mu\text{L}$ , 0.020 mmol, 0.2 equiv) was added to the reaction mixture and stirred at rt for 2 h. After completion, the solvent was evaporated in vacuo. The residue was purified by flash chromatography on silica gel (EtOAc/petroleum ether = 1/7) to give product **3h**: 43.2 mg, 99% yield, as a yellow solid; mp: 120–121 °C;  $[\alpha]_D^{25} = +83.4$  ( $c = 1.5$  in  $\text{CHCl}_3$ ); >19:1 dr; 88% ee, determined by HPLC analysis [Chiralpak IB, *n*-hexane/*i*-PrOH = 80/20, 1.0 mL  $\text{min}^{-1}$ ,  $\lambda = 254$  nm,  $t$  (major) = 14.59 min,  $t$  (minor) = 18.06 min];  $^1\text{H}$  NMR (400 MHz,  $\text{CDCl}_3$ ):  $\delta$  (ppm) 8.26 (d,  $J = 2.0$  Hz, 1H), 8.16–8.12 (m, 2H), 8.03 (dd,  $J = 8.4, 2.0$  Hz, 1H), 7.66 (t,  $J = 7.4$  Hz, 1H), 7.57–7.49 (m, 2H), 7.24–7.20 (m, 2H), 6.96–6.90 (m, 2H), 6.82 (d,  $J = 8.4$  Hz, 1H), 5.11 (s, 1H), 3.86–3.77 (m, 4H), 3.71–3.58 (m, 2H), 3.50 (dd,  $J = 23.2, 3.2$  Hz, 1H);  $^{13}\text{C}$  NMR (100 MHz,  $\text{CDCl}_3$ ):  $\delta$  (ppm) 190.7, 159.9, 153.1, 148.4, 146.4, 145.9, 145.5, 134.4, 132.8, 130.3, 130.0, 128.9, 127.8, 123.2, 119.8, 119.5, 119.2, 114.5, 62.6, 55.3, 53.4, 41.7, 35.7; **HRMS** (ESI-TOF)  $m/z$ :  $[\text{M} + \text{H}]^+$  Calcd for  $\text{C}_{27}\text{H}_{21}\text{N}_2\text{O}_4^+$  437.1501; Found 437.1494.

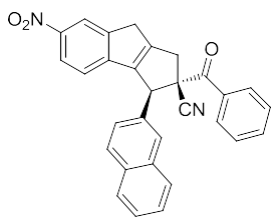

**Synthesis of 3i:** A flame-dried 10 mL Schlenk tube equipped with a magnetic stirring bar was cooled to room temperature. To this flask were added  $\text{Pd}_2(\text{dba})_3$  (4.6 mg, 0.0050 mmol, 0.05 equiv), **L4** (12.1 mg, 0.0200 mmol, 0.2 equiv), **A2** (5.0 mg, 0.020 mmol, 0.2 equiv) and 4 Å MS (100.0



mg), and the flask was evacuated and back-filled three times with argon. Then toluene (0.5 mL) was added by syringe. The mixture was stirred at 30 °C for 10 min. To another dry tube equipped with a magnetic stirring bar were added 2-methylene-6-nitro-2,3-dihydro-1*H*-inden-1-ol **1c** (19.1 mg, 0.100 mmol, 1.0 equiv) and (*E*)-2-benzoyl-3-(naphthalen-2-yl)acrylonitrile **2i** (34.0 mg, 0.120 mmol, 1.2 equiv), evacuated and back-filled three times with argon. Then toluene (0.5 mL) was added by syringe. The mixture was stirred at rt for 5 min. Then the latter solution was added to the first Schlenk tube by syringe. The mixture was stirred at 30 °C for 2 h. After completion, Et<sub>3</sub>N (2.8 μL, 0.020 mmol, 0.2 equiv) was added to the reaction mixture and stirred at rt for 2 h. After completion, the solvent was evaporated in vacuo. The residue was purified by flash chromatography on silica gel (EtOAc/petroleum ether = 1/8) to give product **3i**: 45.1 mg, 99% yield, as a yellow solid; mp: 123–124 °C;  $[\alpha]_D^{25} = +73.6$  ( $c = 1.8$  in CHCl<sub>3</sub>); >19:1 dr; 91% ee, determined by HPLC analysis [Chiralpak IA, *n*-hexane/*i*-PrOH = 80/20, 1.0 mL min<sup>-1</sup>, λ = 254 nm, t (major) = 16.03 min, t (minor) = 19.28 min]; <sup>1</sup>H NMR (400 MHz, CDCl<sub>3</sub>): δ (ppm) 8.28 (d, *J* = 2.0 Hz, 1H), 8.23–8.13 (m, 2H), 7.97 (dd, *J* = 8.4, 2.0 Hz, 1H), 7.91–7.78 (m, 4H), 7.66 (t, *J* = 7.6 Hz, 1H), 7.56–7.47 (m, 4H), 7.38 (dd, *J* = 8.4, 2.0 Hz, 1H), 6.78 (d, *J* = 8.4 Hz, 1H), 5.35 (s, 1H), 3.87 (d, *J* = 17.6 Hz, 1H), 3.77 (d, *J* = 17.6 Hz, 1H), 3.69 (d, *J* = 23.2 Hz, 1H), 3.54 (dd, *J* = 23.2, 3.2 Hz, 1H); <sup>13</sup>C NMR (100 MHz, CDCl<sub>3</sub>): δ (ppm) 191.5, 152.6, 148.4, 147.3, 146.0, 145.6, 134.4, 134.2, 132.8, 132.3, 132.2, 130.0, 129.5, 129.3, 128.9, 127.02, 127.00, 126.0, 125.4, 123.2, 123.1, 119.7, 119.58, 119.51, 61.9, 48.1, 43.5, 35.8; HRMS (ESI-TOF) *m/z*: [M + H]<sup>+</sup> Calcd for C<sub>30</sub>H<sub>21</sub>N<sub>2</sub>O<sub>3</sub><sup>+</sup> 457.1552; Found 457.1559.

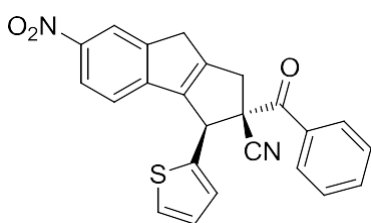

**Synthesis of 3j:** A flame-dried 10 mL Schlenk tube equipped with a magnetic stirring bar was cooled to room temperature. To this flask were added Pd<sub>2</sub>(dba)<sub>3</sub> (4.6 mg, 0.0050 mmol, 0.05 equiv), **L4** (12.1 mg, 0.0200 mmol, 0.2 equiv), **A2** (5.0 mg, 0.020 mmol, 0.2 equiv) and 4 Å MS (100.0 mg), and the flask was evacuated and back-filled

three times with argon. Then toluene (0.5 mL) was added by syringe. The mixture was stirred at 30 °C for 10 min. To another dry tube equipped with a magnetic stirring bar were added 2-methylene-6-nitro-2,3-dihydro-1*H*-inden-1-ol **1c** (19.1 mg, 0.100 mmol, 1.0 equiv) and (*E*)-2-benzoyl-3-(thiophen-2-yl)acrylonitrile **2j** (28.7 mg, 0.123 mmol, 1.2 equiv), evacuated and back-filled three times with argon. Then toluene (0.5 mL) was added by syringe. The mixture was stirred at rt for 5 min. Then the latter solution was added to the first Schlenk tube by syringe. The mixture was stirred at 30 °C for 2 h. After completion, Et<sub>3</sub>N (2.8 μL, 0.020 mmol, 0.2 equiv) was added to the reaction mixture and stirred at rt for 2 h. After completion, the solvent was evaporated in vacuo. The residue was purified by flash chromatography on silica gel (EtOAc/petroleum ether =

1/8) to give product **3j**: 28.8 mg, 70% yield, as a yellow solid; mp: 117–118 °C;  $[\alpha]_D^{25} = +90.6$  ( $c = 1.5$  in  $\text{CHCl}_3$ ); >19:1 dr; 88% ee, determined by HPLC analysis [Chiralpak IA, *n*-hexane/*i*-PrOH = 80/20, 1.0 mL min<sup>-1</sup>,  $\lambda = 254$  nm,  $t$  (minor) = 14.09 min,  $t$  (major) = 17.10 min]; **<sup>1</sup>H NMR** (400 MHz,  $\text{CDCl}_3$ ):  $\delta$  (ppm) 8.27 (d,  $J = 2.0$  Hz, 1H), 8.24–8.20 (m, 2H), 8.09 (dd,  $J = 8.4, 2.0$  Hz, 1H), 7.68 (t,  $J = 7.4$  Hz, 1H), 7.62–7.53 (m, 2H), 7.34 (dd,  $J = 5.2, 1.6$  Hz, 1H), 7.11–7.07 (m, 2H), 7.01 (d,  $J = 8.4$  Hz, 1H), 5.49 (s, 1H), 3.77 (d,  $J = 17.6$  Hz, 1H), 3.70 (dd,  $J = 17.6, 2.0$  Hz, 1H), 3.64 (d,  $J = 22.8$  Hz, 1H), 3.51 (dd,  $J = 22.8, 3.2$  Hz, 1H); **<sup>13</sup>C NMR** (100 MHz,  $\text{CDCl}_3$ ):  $\delta$  (ppm) 190.1, 153.3, 148.2, 146.0, 145.6, 145.5, 138.7, 134.5, 132.5, 130.1, 129.0, 127.7, 127.6, 126.5, 123.2, 119.6, 119.3, 119.1, 62.5, 48.7, 40.9, 35.7; **HRMS** (ESI-TOF)  $m/z$ :  $[\text{M} + \text{Na}]^+$  Calcd for  $\text{C}_{24}\text{H}_{16}\text{N}_2\text{O}_3\text{SNa}^+$  435.0779; Found 435.0773.

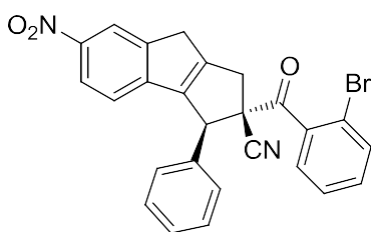

**Synthesis of 3k:** A flame-dried 10 mL Schlenk tube equipped with a magnetic stirring bar was cooled to room temperature. To this flask were added  $\text{Pd}_2(\text{dba})_3$  (4.6 mg, 0.0050 mmol, 0.05 equiv), **L4** (12.1 mg, 0.0200 mmol, 0.2 equiv), (*S*)-**A1** (7.0 mg, 0.020 mmol, 0.2 equiv) and 4 Å MS (100.0 mg), and the flask was evacuated and back-filled three times with argon. Then toluene (0.5 mL) was added by syringe. The mixture was stirred at 30 °C for 10 min. To another dry tube equipped with a magnetic stirring bar were added 2-methylene-6-nitro-2,3-dihydro-1*H*-inden-1-ol **1c** (19.1 mg, 0.100 mmol, 1.0 equiv) and (*E*)-2-(2-bromobenzoyl)-3-phenylacrylonitrile **2k** (37.3 mg, 0.120 mmol, 1.2 equiv), evacuated and back-filled three times with argon. Then toluene (0.5 mL) was added by syringe. The mixture was stirred at rt for 5 min. Then the latter solution was added to the first Schlenk tube by syringe. The mixture was stirred at 30 °C for 14 h. After completion,  $\text{Et}_3\text{N}$  (2.8  $\mu\text{L}$ , 0.020 mmol, 0.2 equiv) was added to the reaction mixture and stirred at rt for 2 h. After completion, the solvent was evaporated in vacuo. The residue was purified by flash chromatography on silica gel (EtOAc/petroleum ether = 1/7) to give product **3k**: 35.2 mg, 73% yield, as a yellow solid; mp: 114–115 °C;  $[\alpha]_D^{25} = +90.4$  ( $c = 1.7$  in  $\text{CHCl}_3$ ); >19:1 dr; 91% ee, determined by HPLC analysis [Chiralpak IA, *n*-hexane/*i*-PrOH = 80/20, 1.0 mL min<sup>-1</sup>,  $\lambda = 254$  nm,  $t$  (minor) = 15.36 min,  $t$  (major) = 16.34 min]; **<sup>1</sup>H NMR** (400 MHz,  $\text{CDCl}_3$ ):  $\delta$  (ppm) 8.30 (d,  $J = 2.4$  Hz, 1H), 8.06 (dd,  $J = 8.4, 2.0$  Hz, 1H), 7.71–7.61 (m, 1H), 7.48–7.44 (m, 1H), 7.42–7.34 (m, 5H), 7.23–7.18 (m, 2H), 6.83 (d,  $J = 8.4$  Hz, 1H), 5.22 (s, 1H), 3.74 (dd,  $J = 17.2, 1.6$  Hz, 1H), 3.71–3.55 (m, 2H), 3.52 (dd,  $J = 23.2, 3.2$  Hz, 1H); **<sup>13</sup>C NMR** (100 MHz,  $\text{CDCl}_3$ ):  $\delta$  (ppm) 196.4, 153.5, 148.4, 146.0, 145.8, 145.6, 138.9, 135.3, 133.7, 132.3, 129.0, 128.98, 128.95, 127.6, 127.4, 123.2, 119.6, 119.4, 119.1, 118.7, 65.9, 54.5, 42.3, 35.8; **HRMS** (ESI-TOF)  $m/z$ :  $[\text{M} + \text{Na}]^+$  Calcd for  $\text{C}_{26}\text{H}_{17}\text{BrN}_2\text{O}_3\text{Na}^+$  507.0320 (<sup>79</sup>Br) and 509.0300 (<sup>81</sup>Br); Found 507.0313 (<sup>79</sup>Br) and 509.0291 (<sup>81</sup>Br).

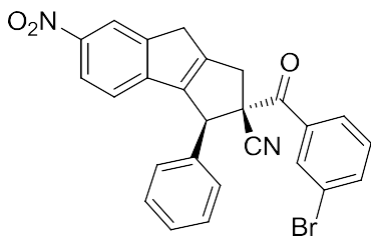

**Synthesis of 3l:** A flame-dried 10 mL Schlenk tube equipped with a magnetic stirring bar was cooled to room temperature. To this flask were added Pd<sub>2</sub>(dba)<sub>3</sub> (4.6 mg, 0.0050 mmol, 0.05 equiv), **L4** (12.1 mg, 0.0200 mmol, 0.2 equiv), (*S*)-**A1** (7.0 mg, 0.020 mmol, 0.2 equiv), and 4 Å MS (100.0 mg), and the flask was evacuated and back-filled three times with argon. Then toluene (0.5 mL) was added

by syringe. The mixture was stirred at 30 °C for 10 min. To another dry tube equipped with a magnetic stirring bar were added 2-methylene-6-nitro-2,3-dihydro-1*H*-inden-1-ol **1c** (19.1 mg, 0.100 mmol, 1.0 equiv) and (*E*)-2-(3-bromobenzoyl)-3-phenylacrylonitrile **2l** (37.3 mg, 0.120 mmol, 1.2 equiv), evacuated and back-filled three times with argon. Then toluene (0.5 mL) was added by syringe. The mixture was stirred at rt for 5 min. Then the latter solution was added to the first Schlenk tube by syringe. The mixture was stirred at 30 °C for 14 h. After completion, Et<sub>3</sub>N (2.8 μL, 0.020 mmol, 0.2 equiv) was added to the reaction mixture and stirred at rt for 2 h. After completion, the solvent was evaporated in vacuo. The residue was purified by flash chromatography on silica gel (EtOAc/petroleum ether = 1/7) to give product **3l**: 36.3 mg, 75% yield, as a yellow solid; mp: 128–129 °C; [α]<sub>D</sub><sup>25</sup> = +88.5 (*c* = 1.7 in CHCl<sub>3</sub>); >19:1 dr; 82% ee, determined by HPLC analysis [Chiralpak IA, *n*-hexane/*i*-PrOH = 90/10, 1.0 mL min<sup>-1</sup>, λ = 254 nm, *t* (major) = 24.16 min, *t* (minor) = 27.15 min]; <sup>1</sup>H NMR (400 MHz, CDCl<sub>3</sub>): δ (ppm) 8.27 (d, *J* = 2.0 Hz, 1H), 8.24–8.23 (m, 1H), 8.07 (d, *J* = 8.0 Hz, 1H), 8.03 (dd, *J* = 8.4, 2.0 Hz, 1H), 7.80–7.76 (m, 1H), 7.45–7.36 (m, 4H), 7.32–7.27 (m, 2H), 6.80 (d, *J* = 8.4 Hz, 1H), 5.11 (s, 1H), 3.83 (d, *J* = 17.2 Hz, 1H), 3.74–3.60 (m, 2H), 3.52 (dd, *J* = 23.2, 3.2 Hz, 1H); <sup>13</sup>C NMR (100 MHz, CDCl<sub>3</sub>): δ (ppm) 189.5, 153.2, 148.3, 146.0, 145.7, 145.5, 137.3, 135.6, 134.5, 133.0, 130.3, 129.2, 129.1, 128.4, 123.3, 123.2, 119.6, 119.3, 119.26, 62.5, 54.0, 41.6, 35.8; HRMS (ESI-TOF) *m/z*: [M + Na]<sup>+</sup> Calcd for C<sub>26</sub>H<sub>17</sub>BrN<sub>2</sub>O<sub>3</sub>Na<sup>+</sup> 507.0320 (<sup>79</sup>Br) and 509.0300 (<sup>81</sup>Br); Found 507.0314 (<sup>79</sup>Br) and 509.0296 (<sup>81</sup>Br).

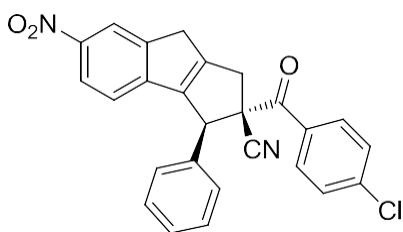

**Synthesis of 3m:** A flame-dried 10 mL Schlenk tube equipped with a magnetic stirring bar was cooled to room temperature. To this flask were added Pd<sub>2</sub>(dba)<sub>3</sub> (4.6 mg, 0.0050 mmol, 0.05 equiv), **L4** (12.1 mg, 0.0200 mmol, 0.2 equiv), **A2** (5.0 mg, 0.020 mmol, 0.2 equiv) and 4 Å MS (100.0 mg), and the flask was

evacuated and back-filled three times with argon. Then toluene (0.5 mL) was added by syringe. The mixture was stirred at 30 °C for 10 min. To another dry tube equipped with a magnetic stirring bar were added 2-methylene-6-nitro-2,3-dihydro-1*H*-inden-1-ol **1c** (19.1 mg, 0.100 mmol, 1.0 equiv) and (*E*)-2-(4-chlorobenzoyl)-3-phenylacrylonitrile **2m** (32.0 mg, 0.120 mmol, 1.2 equiv), evacuated

and back-filled three times with argon. Then toluene (0.5 mL) was added by syringe. The mixture was stirred at rt for 5 min. Then the latter solution was added to the first Schlenk tube by syringe. The mixture was stirred at 30 °C for 0.5 h. After completion, Et<sub>3</sub>N (2.8 μL, 0.020 mmol, 0.2 equiv) was added to the reaction mixture and stirred at rt for 2 h. After completion, the solvent was evaporated in vacuo. The residue was purified by flash chromatography on silica gel (EtOAc/petroleum ether = 1/8) to give product **3m**: 43.9 mg, 99% yield, as a yellow solid; mp: 113–114 °C;  $[\alpha]_D^{25} = +72.6$  ( $c = 1.4$  in CHCl<sub>3</sub>); >19:1 dr; 93% ee, determined by HPLC analysis [Chiralpak IA, *n*-hexane/*i*-PrOH = 80/20, 1.0 mL min<sup>-1</sup>,  $\lambda = 254$  nm,  $t$  (minor) = 12.40 min,  $t$  (major) = 16.17 min]; <sup>1</sup>H NMR (400 MHz, CDCl<sub>3</sub>):  $\delta$  (ppm) 8.27 (d,  $J = 2.0$  Hz, 1H), 8.10–8.06 (m, 2H), 8.03 (dd,  $J = 8.4, 2.0$  Hz, 1H), 7.52–7.48 (m, 2H), 7.44–7.39 (m, 3H), 7.31–7.27 (m, 2H), 6.80 (d,  $J = 8.4$  Hz, 1H), 5.12 (s, 1H), 3.81 (d,  $J = 17.8$  Hz, 1H), 3.73–3.58 (m, 2H), 3.51 (dd,  $J = 23.6, 3.2$  Hz, 1H); <sup>13</sup>C NMR (100 MHz, CDCl<sub>3</sub>):  $\delta$  (ppm) 189.5, 153.2, 148.3, 146.1, 145.7, 145.5, 141.2, 135.7, 131.4, 131.0, 129.3, 129.2, 129.06, 129.03, 123.2, 119.56, 119.52, 119.3, 62.4, 54.0, 41.7, 35.7; HRMS (ESI-TOF)  $m/z$ : [M + Na]<sup>+</sup> Calcd for C<sub>26</sub>H<sub>17</sub>ClN<sub>2</sub>O<sub>3</sub>Na<sup>+</sup> 463.0825 (<sup>35</sup>Cl) and 465.0976 (<sup>37</sup>Cl); Found 463.0821 (<sup>35</sup>Cl) and 465.0803 (<sup>37</sup>Cl).

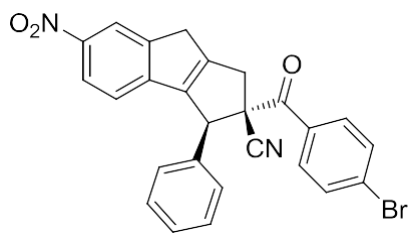

**Synthesis of 3n:** A flame-dried 10 mL Schlenk tube equipped with a magnetic stirring bar was cooled to room temperature. To this flask were added Pd<sub>2</sub>(dba)<sub>3</sub> (4.6 mg, 0.0050 mmol, 0.05 equiv), **L4** (12.1 mg, 0.0200 mmol, 0.2 equiv), **A2** (5.0 mg, 0.020 mmol, 0.2 equiv) and 4 Å MS (100.0 mg), and the flask was

evacuated and back-filled three times with argon. Then toluene (0.5 mL) was added by syringe. The mixture was stirred at 30 °C for 10 min. To another dry tube equipped with a magnetic stirring bar were added 2-methylene-6-nitro-2,3-dihydro-1*H*-inden-1-ol **1c** (19.1 mg, 0.100 mmol, 1.0 equiv) and (*E*)-2-(4-bromobenzoyl)-3-phenylacrylonitrile **2n** (37.3 mg, 0.120 mmol, 1.2 equiv), evacuated and back-filled three times with argon. Then toluene (0.5 mL) was added by syringe. The mixture was stirred at rt for 5 min. Then the latter solution was added to the first Schlenk tube by syringe. The mixture was stirred at 30 °C for 24 h. After completion, Et<sub>3</sub>N (2.8 μL, 0.020 mmol, 0.2 equiv) was added to the reaction mixture and stirred at rt for 2 h. After completion, the solvent was evaporated in vacuo. The residue was purified by flash chromatography on silica gel (EtOAc/petroleum ether = 1/8) to give product **3n**: 36.8 mg, 76% yield, as a yellow solid; mp: 116–117 °C;  $[\alpha]_D^{25} = +94.4$  ( $c = 1.5$  in CHCl<sub>3</sub>); >19:1 dr; 94% ee, determined by HPLC analysis [Chiralpak IA, *n*-hexane/*i*-PrOH = 80/20, 1.0 mL min<sup>-1</sup>,  $\lambda = 254$  nm,  $t$  (minor) = 13.50 min,  $t$  (major) = 17.42 min]; <sup>1</sup>H NMR (400 MHz, CDCl<sub>3</sub>):  $\delta$  (ppm) 8.27 (d,  $J = 2.4$  Hz, 1H), 8.10–7.92 (m, 3H), 7.70–7.65 (m, 2H), 7.46–7.38 (m, 3H), 7.32–7.22 (m, 2H), 6.81 (d,  $J = 8.4$  Hz, 1H), 5.12 (s, 1H),

3.82 (d,  $J = 18.0$  Hz, 1H), 3.73–3.60 (m, 2H), 3.52 (dd,  $J = 23.2, 3.2$  Hz, 1H);  $^{13}\text{C}$  NMR (100 MHz,  $\text{CDCl}_3$ ):  $\delta$  (ppm) 189.7, 153.2, 148.3, 146.1, 145.7, 145.5, 135.7, 132.3, 131.4, 130.0, 129.2, 129.0, 123.2, 119.6, 119.5, 119.2, 62.4, 54.0, 41.7, 35.7; HRMS (ESI-TOF)  $m/z$ :  $[\text{M} + \text{Na}]^+$  Calcd for  $\text{C}_{26}\text{H}_{17}\text{BrN}_2\text{O}_3\text{Na}^+$  507.0320 ( $^{79}\text{Br}$ ) and 509.0300 ( $^{81}\text{Br}$ ); Found 507.0316 ( $^{79}\text{Br}$ ) and 509.0301 ( $^{81}\text{Br}$ ).

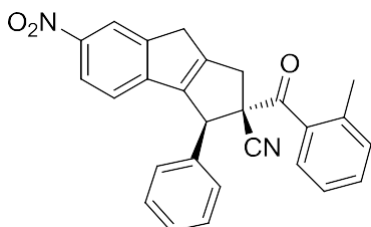

**Synthesis of 3o:** A flame-dried 10 mL Schlenk tube equipped with a magnetic stirring bar was cooled to room temperature. To this flask were added  $\text{Pd}_2(\text{dba})_3$  (4.6 mg, 0.0050 mmol, 0.05 equiv), **L4** (12.1 mg, 0.0200 mmol, 0.2 equiv), (*S*)-**A1** (7.0 mg, 0.020 mmol, 0.2 equiv), and 4 Å MS (100.0 mg), and the flask was evacuated and

back-filled three times with argon. Then toluene (0.5 mL) was added by syringe. The mixture was stirred at 30 °C for 10 min. To another dry tube equipped with a magnetic stirring bar were added 2-methylene-6-nitro-2,3-dihydro-1*H*-inden-1-ol **1c** (19.1 mg, 0.100 mmol, 1.2 equiv) and (*E*)-2-(2-methylbenzoyl)-3-phenylacrylonitrile **2o** (29.6 mg, 0.120 mmol, 1.2 equiv), evacuated and back-filled three times with argon. Then toluene (0.5 mL) was added by syringe. The mixture was stirred at rt for 5 min. Then the latter solution was added to the first Schlenk tube by syringe. The mixture was stirred at 30 °C for 14 h. After completion,  $\text{Et}_3\text{N}$  (2.8  $\mu\text{L}$ , 0.020 mmol, 0.2 equiv) was added to the reaction mixture and stirred at rt for 2 h. After completion, the solvent was evaporated in vacuo. The residue was purified by flash chromatography on silica gel ( $\text{EtOAc}$ /petroleum ether = 1/7) to give product **3o**: 37.8 mg, 90% yield, as a yellow solid; mp: 124–125 °C;  $[\alpha]_{\text{D}}^{25} = +80.9$  ( $c = 1.7$  in  $\text{CHCl}_3$ ); >19:1 dr; 89% ee, determined by HPLC analysis [Chiralpak IA, *n*-hexane/*i*-PrOH = 80/20, 1.0 mL  $\text{min}^{-1}$ ,  $\lambda = 254$  nm,  $t$  (minor) = 11.52 min,  $t$  (major) = 12.75 min];  $^1\text{H}$  NMR (400 MHz,  $\text{CDCl}_3$ ):  $\delta$  (ppm) 8.21 (d,  $J = 2.0$  Hz, 1H), 7.97 (dd,  $J = 8.4, 2.4$  Hz, 1H), 7.67 (d,  $J = 7.6$  Hz, 1H), 7.36 (td,  $J = 7.6, 1.2$  Hz, 1H), 7.32–7.29 (m, 3H), 7.26–7.19 (m, 2H), 7.19–7.15 (m, 2H), 6.74 (d,  $J = 8.4$  Hz, 1H), 5.13 (s, 1H), 3.64 (d,  $J = 17.2$  Hz, 1H), 3.61–3.51 (m, 2H), 3.43 (dd,  $J = 23.2, 3.6$  Hz, 1H), 2.34 (s, 3H);  $^{13}\text{C}$  NMR (100 MHz,  $\text{CDCl}_3$ ):  $\delta$  (ppm) 195.8, 153.4, 148.4, 146.2, 145.9, 145.5, 138.7, 135.7, 134.8, 132.2, 132.1, 129.04, 129.02, 128.9, 127.9, 125.6, 123.2, 119.58, 119.56, 119.4, 65.0, 54.3, 42.5, 35.8, 21.1; HRMS (ESI-TOF)  $m/z$ :  $[\text{M} + \text{H}]^+$  Calcd for  $\text{C}_{27}\text{H}_{21}\text{N}_2\text{O}_3^+$  421.1552; Found 421.1553.

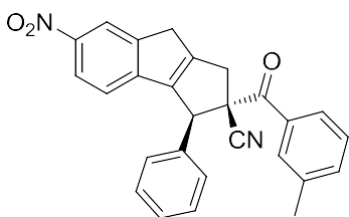

**Synthesis of 3p:** A flame-dried 10 mL Schlenk tube equipped with a magnetic stirring bar was cooled to room temperature. To this flask were added  $\text{Pd}_2(\text{dba})_3$  (4.6 mg, 0.0050 mmol, 0.05 equiv), **L4** (12.1 mg, 0.0200 mmol, 0.2 equiv), (*S*)-**A1** (7.0 mg, 0.020 mmol, 0.2 equiv)

and 4 Å MS (100.0 mg), and the flask was evacuated and back-filled three times with argon. Then toluene (0.5 mL) was added by syringe. The mixture was stirred at 30 °C for 10 min. To another dry tube equipped with a magnetic stirring bar were added 2-methylene-6-nitro-2,3-dihydro-1*H*-inden-1-ol **1c** (19.1 mg, 0.100 mmol, 1.2 equiv) and (*E*)-2-(3-methylbenzoyl)-3-phenylacrylonitrile **2p** (29.6 mg, 0.120 mmol, 1.2 equiv), evacuated and back-filled three times with argon. Then toluene (0.5 mL) was added by syringe. The mixture was stirred at rt for 5 min. Then the latter solution was added to the first Schlenk tube by syringe. The mixture was stirred at 30 °C for 12 h. After completion, Et<sub>3</sub>N (2.8 μL, 0.020 mmol, 0.2 equiv) was added to the reaction mixture and stirred at rt for 2 h. After completion, the solvent was evaporated in vacuo. The residue was purified by flash chromatography on silica gel (EtOAc/petroleum ether = 1/7) to give product **3p**: 30.1 mg, 72% yield, as a yellow solid; mp: 121–122 °C; [ $\alpha$ ]<sub>D</sub><sup>25</sup> = +86.4 (*c* = 1.5 in CHCl<sub>3</sub>); >19:1 dr; 91% ee, determined by HPLC analysis [Chiralpak IA, *n*-hexane/*i*-PrOH = 80/20, 1.0 mL min<sup>-1</sup>,  $\lambda$  = 254 nm, *t* (minor) = 11.16 min, *t* (major) = 12.86 min]; <sup>1</sup>H NMR (400 MHz, CDCl<sub>3</sub>):  $\delta$  (ppm) 8.26 (d, *J* = 2.0 Hz, 1H), 8.06 (dd, *J* = 8.4, 2.0 Hz, 1H), 7.95 (d, *J* = 7.6 Hz, 1H), 7.91 (s, 1H), 7.49–7.44 (m, 1H), 7.44–7.38 (m, 4H), 7.32–7.28 (m, 2H), 6.80 (d, *J* = 8.4 Hz, 1H), 5.14 (s, 1H), 3.85 (d, *J* = 17.2 Hz, 1H), 3.74–3.56 (m, 2H), 3.51 (dd, *J* = 23.2, 3.2 Hz, 1H), 2.42 (s, 3H); <sup>13</sup>C NMR (100 MHz, CDCl<sub>3</sub>):  $\delta$  (ppm) 190.8, 153.5, 148.4, 146.2, 145.9, 145.5, 138.8, 136.0, 135.2, 132.8, 130.6, 129.1, 129.0, 128.8, 128.7, 127.2, 123.2, 119.7, 119.5, 119.2, 62.5, 54.0, 41.8, 35.8, 21.4; HRMS (ESI-TOF) *m/z*: [M + H]<sup>+</sup> Calcd for C<sub>27</sub>H<sub>21</sub>N<sub>2</sub>O<sub>3</sub><sup>+</sup> 421.1552; Found 421.1549.

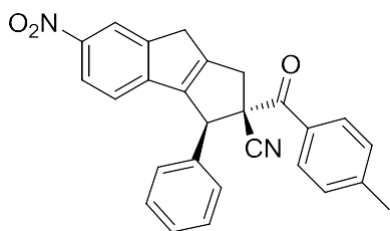

**Synthesis of 3q:** A flame-dried 10 mL Schlenk tube equipped with a magnetic stirring bar was cooled to room temperature. To this flask were added Pd<sub>2</sub>(dba)<sub>3</sub> (4.6 mg, 0.0050 mmol, 0.05 equiv), **L4** (12.1 mg, 0.0200 mmol, 0.2 equiv), **A2** (5.0 mg, 0.020 mmol, 0.2 equiv) and 4 Å MS (100.0 mg), and the flask was evacuated and

back-filled three times with argon. Then toluene (0.5 mL) was added by syringe. The mixture was stirred at rt for 10 min. To another dry tube equipped with a magnetic stirring bar were added 2-methylene-6-nitro-2,3-dihydro-1*H*-inden-1-ol **1c** (19.1 mg, 0.100 mmol, 1.0 equiv) and (*E*)-2-(4-methylbenzoyl)-3-phenylacrylonitrile **2q** (29.6 mg, 0.120 mmol, 1.2 equiv), evacuated and back-filled three times with argon. Then toluene (0.5 mL) was added by syringe. The mixture was stirred at rt for 5 min. Then the latter solution was added to the first Schlenk tube by syringe. The mixture was stirred at 30 °C for 2 h. After completion, Et<sub>3</sub>N (2.8 μL, 0.020 mmol, 0.2 equiv) was added to the reaction mixture and stirred at rt for 1 h. After completion, the solvent was evaporated in vacuo. The residue was purified by flash chromatography on silica gel (EtOAc/petroleum ether = 1/8) to give product **3q**: 41.6 mg, 99% yield, as a yellow solid; mp: 113–114 °C; [ $\alpha$ ]<sub>D</sub><sup>25</sup> = +79.3 (*c* =

1.5 in CHCl<sub>3</sub>); >19:1 dr; 92% ee, determined by HPLC analysis [Chiralpak IA, *n*-hexane/*i*-PrOH = 80/20, 1.0 mL min<sup>-1</sup>, λ = 254 nm, t (minor) = 13.35 min, t (major) = 16.62 min]; <sup>1</sup>H NMR (400 MHz, CDCl<sub>3</sub>): δ (ppm) 8.26 (d, *J* = 2.0 Hz, 1H), 8.07–8.01 (m, 3H), 7.46–7.36 (m, 3H), 7.37–7.28 (m, 4H), 6.81 (d, *J* = 8.4 Hz, 1H), 5.16 (s, 1H), 3.82 (d, *J* = 18.0 Hz, 1H), 3.75–3.58 (m, 2H), 3.51 (dd, *J* = 23.2, 3.2 Hz, 1H), 2.45 (s, 3H); <sup>13</sup>C NMR (100 MHz, CDCl<sub>3</sub>): δ (ppm) 190.1, 153.4, 148.4, 146.3, 145.9, 145.7, 145.5, 136.1, 130.2, 130.1, 129.6, 129.1, 128.9, 123.2, 119.8, 119.5, 119.2, 62.3, 53.9, 41.8, 35.7, 21.8; HRMS (ESI-TOF) *m/z*: [M + Na]<sup>+</sup> Calcd for C<sub>27</sub>H<sub>20</sub>N<sub>2</sub>O<sub>3</sub>Na<sup>+</sup> 443.1372; Found 443.1365.

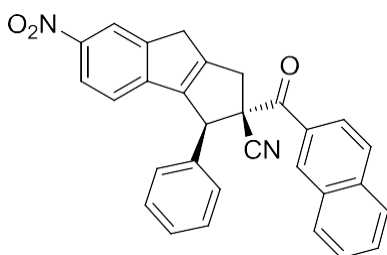

**Synthesis of 3r:** A flame-dried 10 mL Schlenk tube equipped with a magnetic stirring bar was cooled to room temperature. To this flask were added Pd<sub>2</sub>(dba)<sub>3</sub> (4.6 mg, 0.0050 mmol, 0.05 equiv), **L4** (12.1 mg, 0.0200 mmol, 0.2 equiv), **A2** (5.0 mg, 0.020 mmol, 0.2 equiv) and 4 Å MS (100.0 mg), and the flask was evacuated and back-filled three times with argon. Then toluene (0.5 mL) was

added by syringe. The mixture was stirred at 30 °C for 10 min. To another dry tube equipped with a magnetic stirring bar were added 2-methylene-6-nitro-2,3-dihydro-1*H*-inden-1-ol **1c** (19.1 mg, 0.100 mmol, 1.0 equiv) and (*E*)-2-(2-naphthoyl)-3-phenylacrylonitrile **2r** (34.0 mg, 0.120 mmol, 1.2 equiv), evacuated and back-filled three times with argon. Then toluene (0.5 mL) was added by syringe. The mixture was stirred at rt for 5 min. Then the latter solution was added to the first Schlenk tube by syringe. The mixture was stirred at 30 °C for 2 h. After completion, Et<sub>3</sub>N (2.8 μL, 0.020 mmol, 0.2 equiv) was added to the reaction mixture and stirred at rt for 2 h. After completion, the solvent was evaporated in vacuo. The residue was purified by flash chromatography on silica gel (EtOAc/petroleum ether = 1/8) to give product **3r**: 41.6 mg, 91% yield, as a yellow solid; mp: 115–116 °C; [α]<sub>D</sub><sup>25</sup> = +79.2 (*c* = 1.5 in CHCl<sub>3</sub>); >19:1 dr; 90% ee, determined by HPLC analysis [Chiralpak IA, *n*-hexane/*i*-PrOH = 80/20, 1.0 mL min<sup>-1</sup>, λ = 254 nm, t (minor) = 17.17 min, t (major) = 19.02 min]; <sup>1</sup>H NMR (400 MHz, CDCl<sub>3</sub>): δ (ppm) 8.67 (d, *J* = 2.0 Hz, 1H), 8.26 (d, *J* = 2.0 Hz, 1H), 8.13 (dd, *J* = 8.8, 2.0 Hz, 1H), 8.01 (dd, *J* = 8.4, 2.0 Hz, 1H), 7.94 (d, *J* = 8.8 Hz, 1H), 7.90 (dd, *J* = 8.0, 2.8 Hz, 2H), 7.69–7.63 (m, 1H), 7.61–7.55 (m, 1H), 7.46–7.40 (m, 3H), 7.38–7.32 (m, 2H), 6.78 (d, *J* = 8.4 Hz, 1H), 5.18 (s, 1H), 3.96 (d, *J* = 17.6 Hz, 1H), 3.73 (d, *J* = 17.6 Hz, 1H), 3.65 (d, *J* = 23.2 Hz, 1H), 3.52 (dd, *J* = 23.2, 3.2 Hz, 1H); <sup>13</sup>C NMR (100 MHz, CDCl<sub>3</sub>): δ (ppm) 190.5, 153.6, 148.4, 146.1, 145.8, 145.5, 136.0, 135.9, 132.5, 132.1, 130.1, 129.9, 129.5, 129.2, 129.1, 129.0, 128.8, 127.8, 127.3, 125.0, 123.2, 119.9, 119.5, 119.2, 62.5, 54.4, 41.8, 35.8; HRMS (ESI-TOF) *m/z*: [M + H]<sup>+</sup> Calcd for C<sub>30</sub>H<sub>21</sub>N<sub>2</sub>O<sub>3</sub>H<sup>+</sup> 457.1552; Found 457.1546.

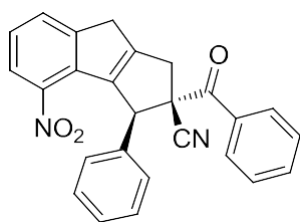

**Synthesis of 3s:** A flame-dried 10 mL Schlenk tube equipped with a magnetic stirring bar was cooled to room temperature. To this flask were added Pd<sub>2</sub>(dba)<sub>3</sub> (4.6 mg, 0.0050 mmol, 0.05 equiv), **L4** (12.1 mg, 0.0200 mmol, 0.2 equiv), **A2** (5.0 mg, 0.020 mmol, 0.2 equiv) and 4 Å MS (100.0 mg), and the flask was evacuated and back-filled three times with argon.

Then toluene (0.5 mL) was added by syringe. The mixture was stirred at 30 °C for 10 min. To another dry tube equipped with a magnetic stirring bar were added 2-methylene-4-nitro-2,3-dihydro-1*H*-inden-1-ol **1d** (19.1 mg, 0.100 mmol, 1.0 equiv) and (*E*)-2-benzoyl-3-phenylacrylonitrile **2a** (28.0 mg, 0.120 mmol, 1.2 equiv), evacuated and back-filled three times with argon. Then toluene (0.5 mL) was added by syringe. The mixture was stirred at rt for 5 min. Then the latter solution was added to the first Schlenk tube by syringe. The mixture was stirred at 30 °C for 5 h. After completion, Et<sub>3</sub>N (2.8 μL, 0.020 mmol, 0.2 equiv) was added to the reaction mixture and stirred at rt for 2 h. After completion, the solvent was evaporated in vacuo. The residue was purified by flash chromatography on silica gel (EtOAc/petroleum ether = 1/8) to give product **3s**: 40.1 mg, 99% yield, as a yellow solid; mp: 120–121 °C; [α]<sub>D</sub><sup>25</sup> = +101.5 (*c* = 1.4 in CHCl<sub>3</sub>); >19:1 dr; 89% ee, determined by HPLC analysis [Chiralpak IA, *n*-hexane/*i*-PrOH = 80/20, 1.0 mL min<sup>-1</sup>, λ = 254 nm, *t* (minor) = 15.94 min, *t* (major) = 16.96 min]; <sup>1</sup>H NMR (400 MHz, CDCl<sub>3</sub>): δ (ppm) 8.20–8.13 (m, 2H), 7.98 (d, *J* = 8.0 Hz, 1H), 7.66 (t, *J* = 7.4 Hz, 1H), 7.56–7.50 (m, 2H), 7.46–7.36 (m, 3H), 7.34–7.30 (m, 2H), 7.29–7.25 (m, 1H), 7.02 (d, *J* = 7.2 Hz, 1H), 5.21 (s, 1H), 4.05 (d, *J* = 23.2 Hz, 1H), 3.90 (dd, *J* = 24.0, 3.2 Hz, 1H), 3.80 (d, *J* = 17.6 Hz, 1H), 3.71 (d, *J* = 17.2 Hz, 1H); <sup>13</sup>C NMR (100 MHz, CDCl<sub>3</sub>): δ (ppm) 190.7, 149.5, 145.4, 144.7, 143.1, 142.5, 136.2, 134.4, 132.8, 130.0, 129.1, 129.0, 128.9, 128.8, 128.1, 125.1, 120.2, 119.7, 62.6, 53.8, 41.6, 37.2. HRMS (ESI-TOF) *m/z*: [M – H]<sup>-</sup> Calcd for C<sub>26</sub>H<sub>17</sub>N<sub>2</sub>O<sub>3</sub><sup>-</sup> 405.1250; Found 405.1247.

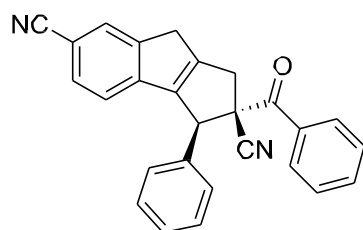

**Synthesis of 3t:** A flame-dried 10 mL Schlenk tube equipped with a magnetic stirring bar was cooled to room temperature. To this flask were added Pd<sub>2</sub>(dba)<sub>3</sub> (4.6 mg, 0.0050 mmol, 0.05 equiv), **L4** (12.1 mg, 0.0200 mmol, 0.2 equiv), **A2** (5.0 mg, 0.020 mmol, 0.2 equiv) and 4 Å MS (100.0 mg), and the flask was evacuated and back-filled

three times with argon. Then toluene (0.5 mL) was added by syringe. The mixture was stirred at 30 °C for 10 min. To another dry tube equipped with a magnetic stirring bar were added 3-hydroxy-2-methylene-2,3-dihydro-1*H*-indene-5-carbonitrile **1f** (17.1 mg, 0.100 mmol, 1.0 equiv) and (*E*)-2-benzoyl-3-phenylacrylonitrile **2a** (28.0 mg, 0.120 mmol, 1.2 equiv), evacuated and back-filled three times with argon. Then toluene (0.5 mL) was added by syringe. The mixture was stirred at rt for 5 min. Then the latter solution was added to the first Schlenk tube by syringe. The



mixture was stirred at 30 °C for 2 h. After completion, Et<sub>3</sub>N (2.8 μL, 0.020 mmol, 0.2 equiv) was added to the reaction mixture and stirred at rt for 2 h. After completion, the solvent was evaporated in vacuo. The residue was purified by flash chromatography on silica gel (EtOAc/petroleum ether = 1/8) to give product **3t**: 38.5 mg, 99% yield, as a yellow solid; mp: 112–113 °C; [ $\alpha$ ]<sub>D</sub><sup>25</sup> = +78.4 (*c* = 1.7 in CHCl<sub>3</sub>); >19:1 dr; 89% ee, determined by HPLC analysis [Chiralpak IA, *n*-hexane/*i*-PrOH = 80/20, 1.0 mL min<sup>-1</sup>,  $\lambda$  = 254 nm, *t* (minor) = 14.40 min, *t* (major) = 17.50 min]; **<sup>1</sup>H NMR** (400 MHz, CDCl<sub>3</sub>):  $\delta$  (ppm) 8.15 (d, *J* = 4.4 Hz, 2H), 7.73–7.64 (m, 2H), 7.56–7.51 (m, 2H), 7.44–7.37 (m, 4H), 7.33–7.28 (m, 2H), 6.81 (d, *J* = 5.2 Hz, 1H), 5.17 (s, 1H), 3.83–3.66 (m, 2H), 3.64–3.40 (m, 2H); **<sup>13</sup>C NMR** (100 MHz, CDCl<sub>3</sub>):  $\delta$  (ppm) 190.5, 151.4, 148.0, 146.3, 143.9, 136.0, 134.3, 132.7, 131.2, 130.0, 129.03, 129.02, 128.9, 128.8, 127.4, 119.9, 119.7, 119.6, 107.9, 62.4, 53.8, 41.6, 35.3; **HRMS** (ESI-TOF) *m/z*: [M + Na]<sup>+</sup> Calcd for C<sub>27</sub>H<sub>18</sub>N<sub>2</sub>ONa<sup>+</sup> 409.1311; Found 409.1318.

## 5.2 Asymmetric [10+2] cycloadditions of allylic alcohol **1c** with alkenes **4**

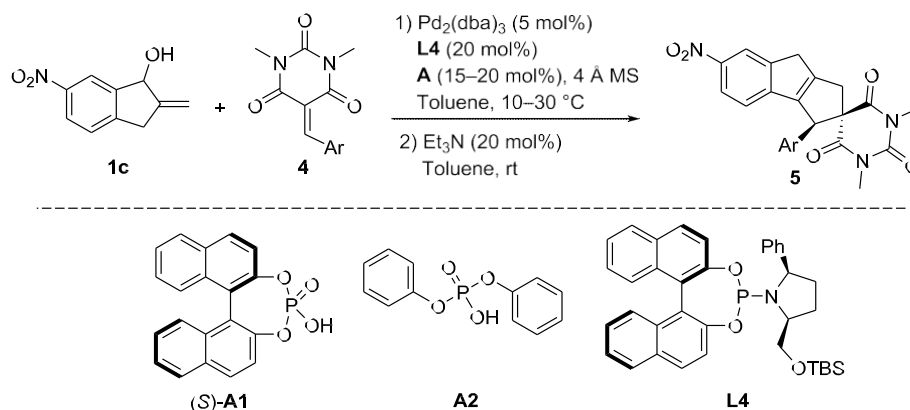

A flame-dried 10 mL Schlenk tube equipped with a magnetic stirring bar was cooled to room temperature. To this flask were added  $\text{Pd}_2(\text{dba})_3$  (0.0050 mmol), **L4** (0.0200 mmol), **(S)-A1** (0.020 mmol) or **A2** (0.015 mmol) and 4 Å MS (100.0 mg), and the flask was evacuated and back-filled three times with argon. Then toluene (0.5 mL) was added by syringe. The mixture was stirred at 30 °C for 10 min. To another dry tube equipped with a magnetic stirring bar were added **1c** (0.100 mmol) and **4** (0.120 mmol), evacuated and back-filled three times with argon. Then toluene (0.5 mL) was added by syringe. The mixture was stirred at rt for 5 min. Then the latter solution was added to the first Schlenk tube by syringe. The mixture was stirred at 10–30 °C for 2–12 h. After completion,  $\text{Et}_3\text{N}$  (0.020 mmol) was added to the reaction mixture and stirred at rt for 2 h. After completion, the solvent was evaporated in vacuo. The residue was purified by flash chromatography on silica gel (EtOAc/petroleum ether) to give the product.

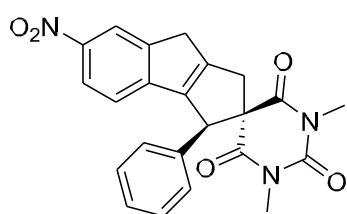

**Synthesis of 5a:** A flame-dried 10 mL Schlenk tube equipped with a magnetic stirring bar was cooled to room temperature. To this flask were added  $\text{Pd}_2(\text{dba})_3$  (4.6 mg, 0.0050 mmol, 0.05 equiv), **L4** (12.1 mg, 0.0200 mmol, 0.2 equiv), **A2** (3.8 mg, 0.015 mmol, 0.15 equiv) and 4 Å MS (100.0 mg), and the flask was evacuated and back-filled three times with argon. Then toluene (0.5 mL) was added by syringe. The mixture was stirred at 30 °C for 10 min. To another dry tube equipped with a magnetic stirring bar were added 2-methylene-6-nitro-2,3-dihydro-1*H*-inden-1-ol **1c** (19.1 mg, 0.100 mmol, 1.0 equiv) and 5-benzylidene-1,3-dimethylpyrimidine-2,4,6(1*H*,3*H*,5*H*)-trione **4a** (29.3 mg, 0.120 mmol, 1.0 equiv), evacuated and back-filled three times with argon. Then toluene (0.5 mL) was added by syringe. The mixture was stirred at rt for 5 min. Then the latter solution was added to the first Schlenk tube by syringe. The mixture was stirred at 15 °C for 3 h. After completion,  $\text{Et}_3\text{N}$  (2.8  $\mu\text{L}$ , 0.020 mmol, 0.2 equiv) was added to the reaction mixture and stirred at rt for 2 h. After completion, the solvent was evaporated in vacuo. The residue was purified by flash chromatography on silica gel (EtOAc/petroleum ether = 1/5) to give product **5a**: 41.2 mg, 99% yield, as a yellow solid; mp:

138–139 °C;  $[\alpha]_{\text{D}}^{25} = +96.6$  ( $c = 1.4$  in  $\text{CHCl}_3$ ); 93% ee, determined by HPLC analysis [Chiralpak IA, *n*-hexane/*i*-PrOH = 80/20, 1.0 mL min<sup>-1</sup>,  $\lambda = 254$  nm,  $t$  (minor) = 17.48 min,  $t$  (major) = 14.40 min]; **<sup>1</sup>H NMR** (400 MHz,  $\text{CDCl}_3$ ):  $\delta$  (ppm) 8.22 (d,  $J = 2.0$  Hz, 1H), 7.93 (dd,  $J = 8.4, 2.0$  Hz, 1H), 7.34–7.20 (m, 3H), 6.92 (d,  $J = 7.8$  Hz, 2H), 6.54 (d,  $J = 8.4$  Hz, 1H), 4.64 (s, 1H), 3.74–3.42 (m, 4H), 3.37 (s, 3H), 2.47 (s, 3H.); **<sup>13</sup>C NMR** (100 MHz,  $\text{CDCl}_3$ ):  $\delta$  (ppm) 170.1, 167.6, 157.8, 149.8, 147.6, 145.2, 144.1, 141.0, 133.5, 128.1, 127.8, 127.6, 122.0, 118.5, 117.7, 67.9, 60.8, 35.3, 34.9, 28.2, 27.1; **HRMS** (ESI-TOF)  $m/z$ :  $[\text{M} + \text{Na}]^+$  Calcd for  $\text{C}_{23}\text{H}_{19}\text{N}_3\text{O}_5\text{Na}^+$  440.1217; Found 440.1217.

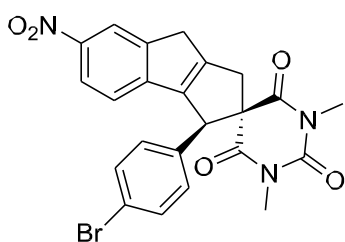

**Synthesis of 5b:** A flame-dried 10 mL Schlenk tube equipped with a magnetic stirring bar was cooled to room temperature. To this flask were added  $\text{Pd}_2(\text{dba})_3$  (4.6 mg, 0.0050 mmol, 0.05 equiv), **L4** (12.1 mg, 0.0200 mmol, 0.2 equiv), (*S*)-**A1** (7.0 mg, 0.020 mmol, 0.2 equiv) and 4 Å MS (100.0 mg), and the flask was evacuated and back-filled three

times with argon. Then toluene (0.5 mL) was added by syringe. The mixture was stirred at 30 °C for 10 min. To another dry tube equipped with a magnetic stirring bar were added 2-methylene-6-nitro-2,3-dihydro-1*H*-inden-1-ol **1c** (19.1 mg, 0.100 mmol, 1.0 equiv) and 5-(4-bromobenzylidene)-1,3-dimethylpyrimidine-2,4,6(1*H*,3*H*,5*H*)-trione **4b** (38.7 mg, 0.120 mmol, 1.2 equiv), evacuated and back-filled three times with argon. Then toluene (0.5 mL) was added by syringe. The mixture was stirred at rt for 5 min. Then the latter solution was added to the first Schlenk tube by syringe. The mixture was stirred at 30 °C for 12 h. After completion,  $\text{Et}_3\text{N}$  (2.8  $\mu\text{L}$ , 0.020 mmol, 0.2 equiv) was added to the reaction mixture and stirred at rt for 2 h. After completion, the solvent was evaporated in vacuo. The residue was purified by flash chromatography on silica gel (EtOAc/petroleum ether = 1/5) to give product **5b**: 29.7 mg, 60% yield; as a white solid; mp: 145–146 °C;  $[\alpha]_{\text{D}}^{25} = +93.6$  ( $c = 1.5$  in  $\text{CHCl}_3$ ); 94% ee, determined by HPLC analysis [Chiralpak IA, *n*-hexane/*i*-PrOH = 80/20, 1.0 mL min<sup>-1</sup>,  $\lambda = 254$  nm,  $t$  (minor) = 12.59 min,  $t$  (major) = 13.69 min]; **<sup>1</sup>H NMR** (400 MHz,  $\text{CDCl}_3$ ):  $\delta$  (ppm) 8.28 (d,  $J = 2.0$  Hz, 1H), 8.01 (dd,  $J = 8.4, 2.0$  Hz, 1H), 7.45 (d,  $J = 8.0$  Hz, 2H), 6.89 (d,  $J = 6.8$  Hz, 2H), 6.60 (d,  $J = 8.4$  Hz, 1H), 4.67 (s, 1H), 3.76–3.49 (m, 4H), 3.43 (s, 3H), 2.62 (s, 3H); **<sup>13</sup>C NMR** (100 MHz,  $\text{CDCl}_3$ ):  $\delta$  (ppm) 171.0, 168.4, 159.2, 150.7, 148.6, 145.8, 145.2, 141.6, 133.6, 132.0, 130.2, 123.2, 123.1, 119.6, 118.6, 68.6, 60.9, 36.6, 35.9, 29.3, 28.2; **HRMS** (ESI-TOF)  $m/z$ :  $[\text{M} + \text{Na}]^+$  Calcd for  $\text{C}_{23}\text{H}_{18}\text{BrN}_3\text{O}_5\text{Na}^+$  518.0328 (<sup>79</sup>Br) and 520.0307 (<sup>81</sup>Br); Found 518.0304 (<sup>79</sup>Br) and 520.0287 (<sup>81</sup>Br).

**Synthesis of 5c:** A flame-dried 10 mL Schlenk tube equipped with a magnetic stirring bar was cooled to room temperature. To this flask were added  $\text{Pd}_2(\text{dba})_3$  (4.6 mg, 0.0050 mmol, 0.05 equiv), **L4** (12.1 mg, 0.0200 mmol, 0.2 equiv), **A2** (3.8 mg, 0.015 mmol, 0.15 equiv) and 4 Å MS (100.0

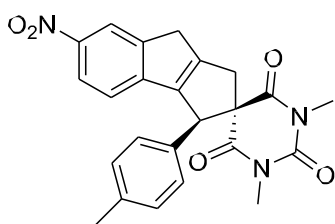

mg), and the flask was evacuated and back-filled three times with argon. Then toluene (0.5 mL) was added by syringe. The mixture was stirred at 30 °C for 10 min. To another dry tube equipped with a magnetic stirring bar were added 2-methylene-6-nitro-2,3-dihydro-1*H*-inden-1-ol **1c** (19.1 mg, 0.100 mmol, 1.0 equiv) and 1,3-dimethyl-5-(4-methylbenzylidene)pyrimidine-2,4,6(1*H*,3*H*,5*H*)-trione **4c** (31.0 mg, 0.120 mmol, 1.2 equiv), evacuated and back-filled three times with argon. Then toluene (0.5 mL) was added by syringe. The mixture was stirred at rt for 5 min. Then the latter solution was added to the first Schlenk tube by syringe. The mixture was stirred at 15 °C for 2 h. After completion, Et<sub>3</sub>N (2.8 μL, 0.020 mmol, 0.2 equiv) was added to the reaction mixture and stirred at rt for 2 h. After completion, the solvent was evaporated in vacuo. The residue was purified by flash chromatography on silica gel (EtOAc/petroleum ether = 1/5) to give product **5c**: 42.8 mg, 99% yield, as a yellow solid; mp: 120–121 °C; [ $\alpha$ ]<sub>D</sub><sup>25</sup> = +94.7 (*c* = 1.4 in CHCl<sub>3</sub>); 93% ee, determined by HPLC analysis [Chiralpak IA, *n*-hexane/*i*-PrOH = 80/20, 1.0 mL min<sup>-1</sup>,  $\lambda$  = 254 nm, *t* (minor) = 8.39 min, *t* (major) = 11.68 min]; <sup>1</sup>H NMR (400 MHz, CDCl<sub>3</sub>):  $\delta$  (ppm) 8.27 (d, *J* = 2.0 Hz, 1H), 7.99 (dd, *J* = 8.4, 2.0 Hz, 1H), 7.11 (d, *J* = 7.6 Hz, 2H), 6.87 (d, *J* = 7.6 Hz, 2H), 6.61 (d, *J* = 8.4 Hz, 1H), 4.68 (s, 1H), 3.78–3.47 (m, 4H), 3.43 (s, 3H), 2.55 (s, 3H), 2.34 (s, 3H); <sup>13</sup>C NMR (100 MHz, CDCl<sub>3</sub>):  $\delta$  (ppm) 170.1, 167.6, 157.8, 149.8, 147.6, 145.2, 144.1, 141.0, 133.5, 128.1, 127.8, 127.6, 122.0, 118.5, 117.7, 67.9, 60.8, 35.3, 34.9, 28.2, 27.1; HRMS (ESI-TOF) *m/z*: [M + Na]<sup>+</sup> Calcd for C<sub>24</sub>H<sub>21</sub>N<sub>3</sub>O<sub>5</sub>Na<sup>+</sup> 454.1373; Found 454.1362.

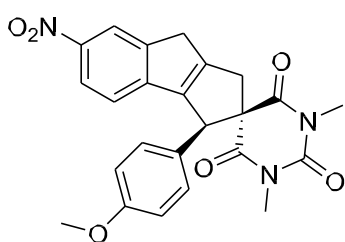

**Synthesis of 5d:** A flame-dried 10 mL Schlenk tube equipped with a magnetic stirring bar was cooled to room temperature. To this flask were added Pd<sub>2</sub>(dba)<sub>3</sub> (4.6 mg, 0.0050 mmol, 0.05 equiv), **L4** (12.1 mg, 0.0200 mmol, 0.2 equiv), **A2** (3.8 mg, 0.015 mmol, 0.15 equiv) and 4 Å MS (100.0 mg), and the flask was evacuated and back-filled three times with argon. Then toluene (0.5 mL) was added by syringe. The mixture was stirred at 30 °C for 10 min. To another dry tube equipped with a magnetic stirring bar were added 2-methylene-6-nitro-2,3-dihydro-1*H*-inden-1-ol **1c** (19.1 mg, 0.100 mmol, 1.0 equiv) and 5-(4-methoxybenzylidene)-1,3-dimethylpyrimidine-2,4,6(1*H*,3*H*,5*H*)-trione **4d** (32.9 mg, 0.100 mmol, 1.0 equiv), evacuated and back-filled three times with argon. Then toluene (0.5 mL) was added by syringe. The mixture was stirred at rt for 5 min. Then the latter solution was added to the first Schlenk tube by syringe. The mixture was stirred at 15 °C for 2 h. After completion, Et<sub>3</sub>N (2.8 μL, 0.020 mmol, 0.2 equiv) was added to the reaction mixture and stirred at rt for 2 h. After completion, the solvent was evaporated in vacuo. The residue was purified by flash chromatography

on silica gel (EtOAc/petroleum ether = 1/5) to give product **5d**: 44.6 mg, 99% yield, as a yellow solid; mp: 131–132 °C;  $[\alpha]_{\text{D}}^{25} = +98.4$  ( $c = 1.5$  in  $\text{CHCl}_3$ ); 80% ee, determined by HPLC analysis [Chiralpak IA, *n*-hexane/*i*-PrOH = 80/20, 1.0 mL min<sup>-1</sup>,  $\lambda = 254$  nm,  $t$  (minor) = 14.40 min,  $t$  (major) = 19.63 min]; <sup>1</sup>H NMR (400 MHz, CDCl<sub>3</sub>):  $\delta$  (ppm) 8.28 (d,  $J = 2.0$  Hz, 1H), 7.99 (dd,  $J = 8.4, 2.0$  Hz, 1H), 6.97–6.87 (m, 2H), 6.86–6.79 (m, 2H), 6.62 (d,  $J = 8.4$  Hz, 1H), 4.67 (s, 1H), 3.80 (s, 3H), 3.74–3.49 (m, 4H), 3.43 (s, 3H), 2.61 (s, 3H); <sup>13</sup>C NMR (100 MHz, CDCl<sub>3</sub>):  $\delta$  (ppm) 171.3, 168.7, 160.1, 158.6, 150.9, 148.6, 146.3, 145.1, 142.3, 129.8, 126.3, 123.0, 119.5, 118.7, 114.2, 69.0, 61.4, 55.3, 36.1, 35.9, 29.2, 28.3; HRMS (ESI-TOF)  $m/z$ :  $[\text{M} + \text{Na}]^+$  Calcd for C<sub>24</sub>H<sub>21</sub>N<sub>3</sub>O<sub>6</sub>Na<sup>+</sup> 470.1323; Found 470.1314.

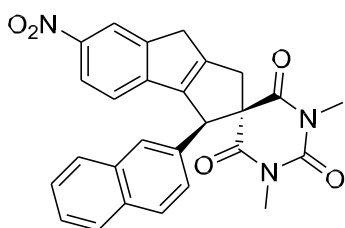

**Synthesis of 5e:** A flame-dried 10 mL Schlenk tube equipped with a magnetic stirring bar was cooled to room temperature. To this flask were added Pd<sub>2</sub>(dba)<sub>3</sub> (4.6 mg, 0.0050 mmol, 0.05 equiv), **L4** (12.1 mg, 0.0200 mmol, 0.2 equiv), **A2** (3.8 mg, 0.015 mmol, 0.15 equiv) and 4 Å MS (100.0 mg), and the flask was evacuated and back-filled three times with argon. Then toluene (0.5 mL) was added by syringe. The mixture was stirred at 30 °C for 10 min. To another dry tube equipped with a magnetic stirring bar were added 2-methylene-6-nitro-2,3-dihydro-1*H*-inden-1-ol **1c** (19.1 mg, 0.100 mmol, 1.0 equiv) and 1,3-dimethyl-5-(naphthalen-2-ylmethylene)pyrimidine-2,4,6(1*H*,3*H*,5*H*)-trione **4e** (35.9 mg, 0.122 mmol, 1.2 equiv), evacuated and back-filled three times with argon. Then toluene (0.5 mL) was added by syringe. The mixture was stirred at rt for 5 min. Then the latter solution was added to the first Schlenk tube by syringe. The mixture was stirred at 14 °C for 2 h. After completion, Et<sub>3</sub>N (2.8 μL, 0.020 mmol, 0.2 equiv) was added to the reaction mixture and stirred at rt for 2 h. After completion, the solvent was evaporated in vacuo. The residue was purified by flash chromatography on silica gel (EtOAc/petroleum ether = 1/5) to give product **5e**: 35.2mg, 75% yield, as a yellow solid; mp: 135–136 °C;  $[\alpha]_{\text{D}}^{25} = +96.4$  ( $c = 1.6$  in  $\text{CHCl}_3$ ); 93% ee, determined by HPLC analysis [Chiralpak IA, *n*-hexane/*i*-PrOH = 80/20, 1.0 mL min<sup>-1</sup>,  $\lambda = 254$  nm,  $t$  (minor) = 22.11 min,  $t$  (major) = 26.36 min]; <sup>1</sup>H NMR (400 MHz, CDCl<sub>3</sub>):  $\delta$  (ppm) 8.30 (d,  $J = 2.0$  Hz, 1H), 7.94 (dd,  $J = 8.4, 2.0$  Hz, 1H), 7.85–7.70 (m, 3H), 7.55–7.45 (m, 3H), 7.07 (s, 1H), 6.59 (d,  $J = 8.4$  Hz, 1H), 4.89 (s, 1H), 3.95–3.52 (m, 4H), 3.47 (s, 3H), 2.31 (s, 3H); <sup>13</sup>C NMR (100 MHz, CDCl<sub>3</sub>):  $\delta$  (ppm) 171.2, 168.6, 159.0, 150.8, 148.6, 146.3, 145.1, 142.1, 133.2, 133.0, 131.9, 128.6, 128.1, 128.0, 127.7, 126.9, 125.8, 123.1, 119.5, 118.8, 69.0, 61.9, 36.4, 36.0, 29.3, 28.1. HRMS (ESI-TOF)  $m/z$ :  $[\text{M} + \text{Na}]^+$  Calcd for C<sub>27</sub>H<sub>21</sub>N<sub>3</sub>O<sub>5</sub>Na<sup>+</sup> 490.1373; Found 490.1372.

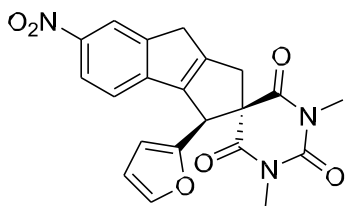

**Synthesis of 5f:** A flame-dried 10 mL Schlenk tube equipped with a magnetic stirring bar was cooled to room temperature. To this flask were added  $\text{Pd}_2(\text{dba})_3$  (4.6 mg, 0.0050 mmol, 0.05 equiv), **L4** (12.1 mg, 0.0200 mmol, 0.2 equiv), **A2** (3.8 mg, 0.015 mmol, 0.15 equiv) and 4 Å MS (100.0 mg), and the flask was evacuated and back-filled three times with argon. Then toluene (0.5 mL) was added by syringe. The mixture was stirred at 30 °C for 10 min. To another dry tube equipped with a magnetic stirring bar were added 2-methylene-6-nitro-2,3-dihydro-1*H*-inden-1-ol **1c** (19.1 mg, 0.100 mmol, 1.0 equiv), 5-(furan-2-ylmethylene)-1,3-dimethylpyrimidine-2,4,6(1*H*,3*H*,5*H*)-trione **4f** (28.1 mg, 0.120 mmol, 1.2 equiv) and evacuated and back-filled three times with argon. Then toluene (0.5 mL) was added by syringe. The mixture was stirred at rt for 5 min. Then the latter solution was added to the first Schlenk tube by syringe. The mixture was stirred at 10 °C for 2 h. After completion,  $\text{Et}_3\text{N}$  (2.8  $\mu\text{L}$ , 0.020 mmol, 0.2 equiv) was added to the reaction mixture and stirred at rt for 2 h. After completion, the solvent was evaporated in vacuo. The residue was purified by flash chromatography on silica gel (EtOAc/petroleum ether = 1/5) to give product **5f**: 36.3 mg, 89% yield, as a white solid; mp: 127–128 °C;  $[\alpha]_{\text{D}}^{25} = +92.8$  ( $c = 1.2$  in  $\text{CHCl}_3$ ); 96% ee, determined by HPLC analysis [Chiralpak IA, *n*-hexane/*i*-PrOH = 80/20, 1.0 mL  $\text{min}^{-1}$ ,  $\lambda = 254$  nm,  $t$  (major) = 19.90 min,  $t$  (minor) = 24.15 min];  $^1\text{H NMR}$  (400 MHz,  $\text{CDCl}_3$ ):  $\delta$  (ppm) 8.29 (d,  $J = 2.4$  Hz, 1H), 8.09 (d,  $J = 7.6$  Hz, 1H), 7.40 (s, 1H), 6.91 (d,  $J = 8.4$  Hz, 1H), 6.36 (s, 1H), 6.08 (d,  $J = 3.2$  Hz, 1H), 4.85 (s, 1H), 3.72–3.47 (m, 4H), 3.44 (s, 3H), 2.88 (s, 3H);  $^{13}\text{C NMR}$  (100 MHz,  $\text{CDCl}_3$ ):  $\delta$  (ppm) 170.8, 168.5, 159.0, 151.0, 148.9, 148.5, 146.0, 145.3, 143.4, 139.8, 123.1, 119.5, 118.7, 111.1, 110.4, 67.7, 54.4, 36.5, 35.9, 29.3, 28.8; **HRMS** (ESI-TOF)  $m/z$ :  $[\text{M} + \text{Na}]^+$  Calcd for  $\text{C}_{21}\text{H}_{17}\text{N}_3\text{O}_6\text{Na}^+$  430.1010; Found 430.1020.

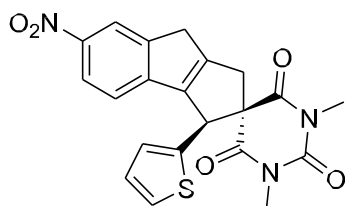

**Synthesis of 5g:** A flame-dried 10 mL Schlenk tube equipped with a magnetic stirring bar was cooled to room temperature. To this flask were added  $\text{Pd}_2(\text{dba})_3$  (4.6 mg, 0.0050 mmol, 0.05 equiv), **L4** (12.1 mg, 0.0200 mmol, 0.2 equiv), (*S*)-**A1** (7.0 mg, 0.020 mmol, 0.2 equiv) and 4 Å MS (100.0 mg), and the flask was evacuated and back-filled three times with argon. Then toluene (0.5 mL) was added by syringe. The mixture was stirred at 30 °C for 10 min. To another dry tube equipped with a magnetic stirring bar were added 2-methylene-6-nitro-2,3-dihydro-1*H*-inden-1-ol **1c** (19.1 mg, 0.100 mmol, 1.0 equiv) and 1,3-dimethyl-5-(thiophen-2-ylmethylene)pyrimidine-2,4,6(1*H*,3*H*,5*H*)-trione **4g** (30.0 mg, 0.120 mmol, 1.2 equiv), evacuated and back-filled three times with argon. Then toluene (0.5 mL) was added by syringe. The mixture was stirred at rt for 5 min. Then the latter solution was added to the

first Schlenk tube by syringe. The mixture was stirred at 30 °C for 12 h. After completion, Et<sub>3</sub>N (2.8 μL, 0.020 mmol, 0.2 equiv) was added to the reaction mixture and stirred at rt for 2 h. After completion, the solvent was evaporated in vacuo. The residue was purified by flash chromatography on silica gel (EtOAc/petroleum ether = 1/5) to give product **5g**: 27.1 mg, 64% yield, as a yellow solid; mp: 133–134 °C;  $[\alpha]_{\text{D}}^{25} = +95.6$  ( $c = 1.4$  in CHCl<sub>3</sub>); 87% ee, determined by HPLC analysis [Chiralpak IA, *n*-hexane/*i*-PrOH = 80/20, 1.0 mL min<sup>-1</sup>,  $\lambda = 254$  nm,  $t$  (minor) = 10.88 min,  $t$  (major) = 14.17 min]; <sup>1</sup>H NMR (400 MHz, CDCl<sub>3</sub>):  $\delta$  (ppm) 8.28 (d,  $J = 2.0$  Hz, 1H), 8.04 (dd,  $J = 8.4, 2.0$  Hz, 1H), 7.30 (d,  $J = 4.8$  Hz, 1H), 7.01–6.96 (m, 1H), 6.79–6.72 (m, 2H), 4.99 (s, 1H), 3.78–3.48 (m, 4H), 3.43 (s, 3H), 2.76 (s, 3H); <sup>13</sup>C NMR (100 MHz, CDCl<sub>3</sub>):  $\delta$  (ppm) 170.9, 168.5, 158.7, 150.9, 148.5, 146.0, 145.2, 141.8, 136.6, 128.0, 127.5, 126.6, 123.0, 119.5, 118.8, 69.1, 56.2, 36.5, 35.9, 29.3, 28.5; HRMS (ESI-TOF)  $m/z$ :  $[M + Na]^+$  Calcd for C<sub>21</sub>H<sub>17</sub>N<sub>3</sub>O<sub>5</sub>SNa<sup>+</sup> 446.0781; Found 446.0791.

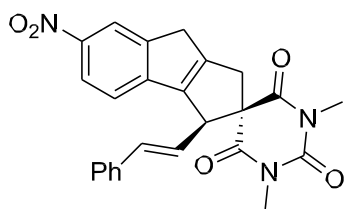

**Synthesis of 5h:** A flame-dried 10 mL Schlenk tube equipped with a magnetic stirring bar was cooled to room temperature. To this flask were added Pd<sub>2</sub>(dba)<sub>3</sub> (4.6 mg, 0.0050 mmol, 0.05 equiv), **L4** (12.1 mg, 0.0200 mmol, 0.2 equiv), **A2** (3.8 mg, 0.015 mmol, 0.15 equiv) and 4 Å MS (100.0 mg), and the flask was evacuated and back-filled three times with argon. Then toluene (0.5 mL) was added by syringe. The mixture was stirred at rt for 10 min. To another dry tube equipped with a magnetic stirring bar were added 2-methylene-6-nitro-2,3-dihydro-1*H*-inden-1-ol **1c** (19.1 mg, 0.100 mmol, 1.0 equiv) and (*E*)-1,3-dimethyl-5-(3-phenylallylidene)pyrimidine-2,4,6(1*H*,3*H*,5*H*)-trione **4h** (32.4 mg, 0.120 mmol, 1.2 equiv), evacuated and back-filled three times with argon. Then toluene (0.5 mL) was added by syringe. The mixture was stirred at 30 °C for 5 min. Then the latter solution was added to the first Schlenk tube by syringe. The mixture was stirred at 15 °C for 2 h. After completion, Et<sub>3</sub>N (2.8 μL, 0.020 mmol, 0.2 equiv) was added to the reaction mixture and stirred at rt for 2 h. After completion, the solvent was evaporated in vacuo. The residue was purified by flash chromatography on silica gel (EtOAc/petroleum ether = 1/5) to give product **5h**: 40.5 mg, 91% yield, as a yellow solid; mp: 130–131 °C;  $[\alpha]_{\text{D}}^{25} = +97.6$  ( $c = 1.5$  in CHCl<sub>3</sub>); 80% ee, determined by HPLC analysis [Chiralpak IA, *n*-hexane/*i*-PrOH = 80/20, 1.0 mL min<sup>-1</sup>,  $\lambda = 254$  nm,  $t$  (major) = 13.32 min,  $t$  (minor) = 14.42 min]; <sup>1</sup>H NMR (400 MHz, CDCl<sub>3</sub>):  $\delta$  (ppm) 8.26 (d,  $J = 2.0$  Hz, 1H), 8.09 (dd,  $J = 7.6, 1.6$  Hz, 1H), 7.37–7.27 (m, 5H), 7.11 (d,  $J = 8.0$  Hz, 1H), 6.66 (d,  $J = 16.0$  Hz, 1H), 6.07 (dd,  $J = 16.0, 9.6$  Hz, 1H), 4.24 (d,  $J = 9.2$  Hz, 1H), 3.59–3.49 (m, 4H), 3.41 (s, 3H), 3.14 (s, 3H); <sup>13</sup>C NMR (100 MHz, CDCl<sub>3</sub>):  $\delta$  (ppm) 171.2, 169.0, 157.7, 151.2, 148.6, 146.4, 145.2, 142.5, 136.1, 135.5, 128.9,

128.7, 126.7, 123.9, 123.1, 119.5, 118.3, 67.3, 58.8, 36.7, 35.7, 29.3, 28.8; **HRMS** (ESI-TOF) m/z:  
[M + Na]<sup>+</sup> Calcd for C<sub>25</sub>H<sub>21</sub>N<sub>3</sub>O<sub>5</sub>Na<sup>+</sup> 466.1373; Found 466.1362.



### 5.3 Asymmetric [10+2] cycloaddition of allylic alcohol **1c** with alkene **6**

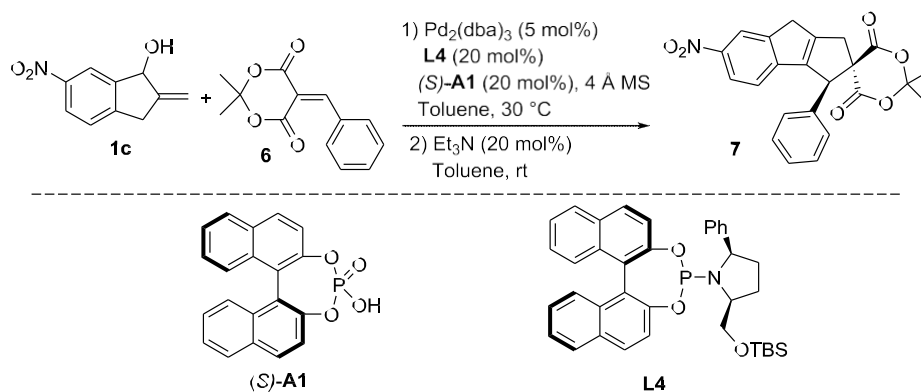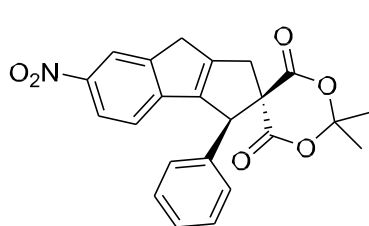

**Synthesis of 7:** A flame-dried 10 mL Schlenk tube equipped with a magnetic stirring bar was cooled to room temperature. To this flask were added Pd<sub>2</sub>(dba)<sub>3</sub> (4.6 mg, 0.0050 mmol, 0.05 equiv), L4 (12.1 mg, 0.020 mmol, 0.2 equiv), (S)-A1 (7.0 mg, 0.020 mmol, 0.2 equiv) and 4 Å MS (100.0 mg), and the flask was evacuated and back-filled

three times with argon. Then toluene (0.5 mL) was added by syringe. The mixture was stirred at 30 °C for 10 min. To another dry tube equipped with a magnetic stirring bar were added 2-methylene-6-nitro-2,3-dihydro-1*H*-inden-1-ol **1c** (19.1 mg, 0.100 mmol, 1.0 equiv) and 5-benzylidene-2,2-dimethyl-1,3-dioxane-4,6-dione **6** (27.8 mg, 0.120 mmol, 1.2 equiv), evacuated and back-filled three times with argon. Then toluene (0.5 mL) was added by syringe. The mixture was stirred at 30 °C for 5 min. Then the latter solution was added to the first Schlenk tube by syringe. The mixture was stirred at 30 °C for 16 h. After completion, Et<sub>3</sub>N (2.8 μL, 0.020 mmol, 0.2 equiv) was added to the reaction mixture and stirred at rt for 2 h. After completion, the solvent was evaporated in vacuo. The residue was purified by flash chromatography on silica gel (EtOAc/petroleum ether = 1/7) to give product **7**: 26.7 mg, 66% yield, as a white solid; mp: 146–147 °C; [α]<sub>D</sub><sup>25</sup> = +78.5 (*c* = 1.3 in CHCl<sub>3</sub>); 87% ee, determined by HPLC analysis [Chiralpak IA, *n*-hexane/*i*-PrOH = 80/20, 1.0 mL min<sup>-1</sup>, λ = 254 nm, *t* (minor) = 15.57 min, *t* (major) = 22.12 min]; <sup>1</sup>H NMR (400 MHz, CDCl<sub>3</sub>): δ (ppm) 8.22 (d, *J* = 2.0 Hz, 1H), 7.93 (dd, *J* = 8.4, 2.0 Hz, 1H), 7.33–7.20 (m, 3H), 6.92 (d, *J* = 7.8 Hz, 2H), 6.54 (d, *J* = 8.4 Hz, 1H), 4.65 (s, 1H), 3.75–3.42 (m, 3H), 3.37 (s, 3H), 2.47 (s, 3H); <sup>13</sup>C NMR (100 MHz, CDCl<sub>3</sub>): δ (ppm) 170.3, 168.9, 157.2, 149.8, 149.5, 148.2, 134.4, 129.2, 129.1, 128.7, 123.5, 123.1, 119.8, 115.9, 105.6, 65.5, 58.6, 57.5, 36.5, 30.3, 27.6; HRMS (ESI-TOF) *m/z*: [M + Na]<sup>+</sup> Calcd for C<sub>23</sub>H<sub>19</sub>N<sub>3</sub>O<sub>6</sub>Na<sup>+</sup> 428.1105; Found 428.1100.

## 5.4 Asymmetric [10+8] cycloaddition of allylic alcohol **1c** with alkene **8**

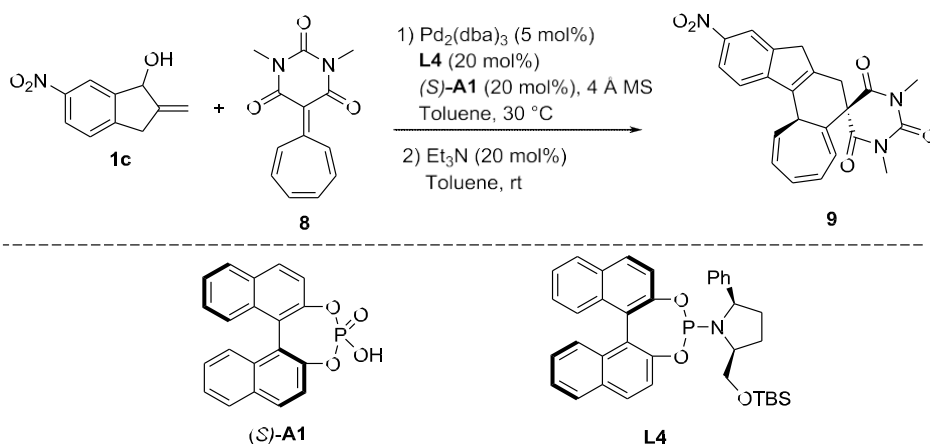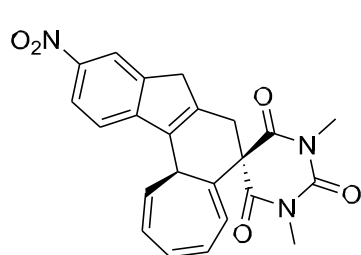

**Synthesis of 9:** A flame-dried 10 mL Schlenk tube equipped with a magnetic stirring bar was cooled to room temperature. To this flask were added Pd<sub>2</sub>(dba)<sub>3</sub> (4.6 mg, 0.0050 mmol, 0.05 equiv), **L4** (12.1 mg, 0.020 mmol, 0.2 equiv), (*S*)-**A1** (7.0 mg, 0.020 mmol, 0.2 equiv) and 4 Å MS (100.0 mg), and the flask was evacuated and back-filled three times with argon. Then toluene (0.5 mL) was added by syringe.

The mixture was stirred at 30 °C for 10 min. To another dry tube equipped with a magnetic stirring bar were added 2-methylene-6-nitro-2,3-dihydro-1*H*-inden-1-ol **1c** (22.9 mg, 0.120 mmol, 1.2 equiv) and 5-(cyclohepta-2,4,6-trien-1-ylidene)-1,3-dimethylpyrimidine-2,4,6-(1*H*,3*H*,5*H*)-trione **8** (24.4 mg, 0.100 mmol, 1.0 equiv), evacuated and back-filled three times with argon. Then toluene (0.5 mL) was added by syringe. The mixture was stirred at rt for 5 min. Then the latter solution was added to the first Schlenk tube by syringe. The mixture was stirred at 30 °C for 14 h. After completion, Et<sub>3</sub>N (2.8 μL, 0.020 mmol, 0.2 equiv) was added to the reaction mixture and stirred at rt for 2 h. After completion, the solvent was evaporated in vacuo. The residue was purified by flash chromatography on silica gel (EtOAc/petroleum ether = 1/6) to give product **9**: 25.8 mg, 62% yield, as a white solid; mp: 146–147 °C; [ $\alpha$ ]<sub>D</sub><sup>25</sup> = +78.5 (*c* = 1.3 in CHCl<sub>3</sub>); 93% ee, determined by HPLC analysis [Chiralpak AD-H, *n*-hexane/*i*-PrOH = 90/10, 1.0 mL min<sup>-1</sup>,  $\lambda$  = 254 nm, *t* (major) = 9.25 min, *t* (minor) = 11.90 min]; <sup>1</sup>H NMR (400 MHz, CDCl<sub>3</sub>):  $\delta$  (ppm) 8.30 (d, *J* = 2.0 Hz, 1H), 8.19 (dd, *J* = 8.4, 2.0 Hz, 1H), 7.30 (d, *J* = 8.3 Hz, 1H), 6.84 (dd, *J* = 11.2, 5.2 Hz, 1H), 6.67 (dd, *J* = 11.2, 6.0 Hz, 1H), 6.41–6.28 (m, 1H), 6.02 (d, *J* = 5.6 Hz, 1H), 5.32 (dd, *J* = 9.2, 6.8 Hz, 1H), 3.68–3.62 (m, 3H), 3.44 (s, 3H), 3.10 (m, 4H), 2.79 (d, *J* = 3.2 Hz, 1H); <sup>13</sup>C NMR (100 MHz, CDCl<sub>3</sub>):  $\delta$  (ppm) 170.8, 169.5, 150.8, 150.7, 145.4, 145.2, 143.5, 133.9, 132.2, 129.8, 128.9, 128.6, 126.0, 123.1, 122.5, 118.9, 118.1, 56.0, 40.7, 38.0, 32.2, 29.4, 29.1; HRMS (ESI-TOF) *m/z*: [M + Na]<sup>+</sup> Calcd for C<sub>23</sub>H<sub>19</sub>N<sub>3</sub>O<sub>5</sub>Na<sup>+</sup> 440.1222; Found 440.1217.

## 5.5 Asymmetric [10+4] and [10+2] cycloadditions of allylic carbonate **1g** with alkene **10**

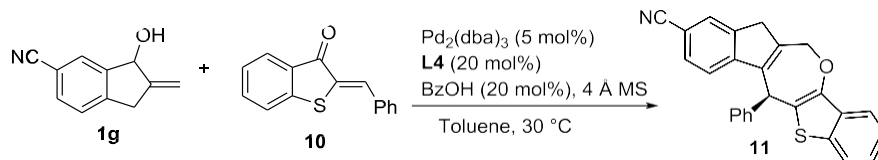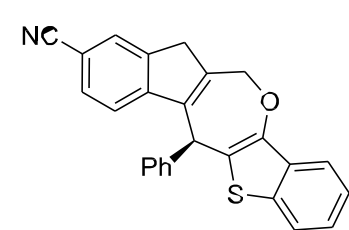

**Synthesis of 11:** A flame-dried 10 mL Schlenk tube equipped with a magnetic stirring bar was cooled to room temperature. To this flask were added  $\text{Pd}_2(\text{dba})_3$  (4.6 mg, 0.0050 mmol, 0.05 equiv), **L4** (12.1 mg, 0.0200 mmol, 0.2 equiv),  $\text{BzOH}$  (2.4 mg, 0.020 mmol, 0.2 equiv) and 4 Å MS (100.0 mg), and the flask was evacuated and back-filled three times with argon. Then toluene (0.5 mL) was added by syringe. The mixture was stirred at 30 °C for 10 min. To another dry tube equipped with a magnetic stirring bar were added *tert*-butyl (6-cyano-2-methylene-2,3-dihydro-1*H*-inden-1-yl) carbonate **1g** (27.1 mg, 0.100 mmol, 1.0 equiv) and (*Z*)-2-benzylidenebenzo[*b*]thiophen-3(2*H*)-one **10** (28.6 mg, 0.120 mmol, 1.2 equiv), evacuated and back-filled three times with argon. Then toluene (0.5 mL) was added by syringe. The mixture was stirred at rt for 5 min. Then the latter solution was added to the first Schlenk tube by syringe. After completion, the solvent was evaporated in vacuo. The residue was purified by flash chromatography on silica gel (EtOAc/petroleum ether = 1/15) to give product **11**: 21.2 mg, 54% yield, as a white solid; mp: 110–111 °C;  $[\alpha]_D^{25} = -59.2$  ( $c = 0.6$  in  $\text{CHCl}_3$ ); 87% ee, determined by HPLC analysis [Chiralpak IA, *n*-hexane/*i*-PrOH = 95/5, 1.0 mL min<sup>-1</sup>,  $\lambda = 254$  nm,  $t$  (minor) = 22.75 min,  $t$  (major) = 24.87 min]; **<sup>1</sup>H NMR** (400 MHz,  $\text{CDCl}_3$ ):  $\delta$  (ppm) 7.73 (d,  $J = 7.2$  Hz, 1H), 7.70–7.60 (m, 2H), 7.52–7.49 (m, 3H), 7.38–7.31 (m, 1H), 7.31–7.26 (m, 3H), 7.19–7.17 (m, 2H), 5.34–5.26 (m, 2H), 5.03 (d,  $J = 15.6$  Hz, 1H), 3.56 (s, 2H); **<sup>13</sup>C NMR** (100 MHz,  $\text{CDCl}_3$ ):  $\delta$  (ppm) 149.3, 146.7, 144.9, 142.2, 141.9, 137.7, 135.4, 134.3, 131.2, 129.0, 127.7, 127.4, 126.9, 125.0, 124.6, 124.2, 122.4, 120.7, 119.9, 119.7, 108.1, 69.2, 44.1, 40.1; **HRMS** (ESI-TOF)  $m/z$ :  $[\text{M} + \text{H}]^+$  Calcd for  $\text{C}_{26}\text{H}_{18}\text{NOS}^+$  392.1104; Found 392.1103.

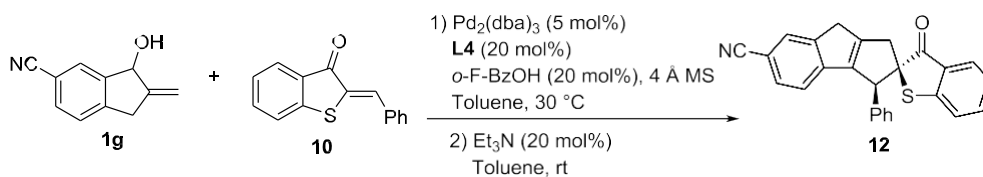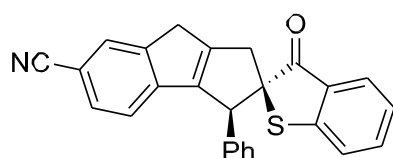

**Synthesis of 12:** A flame-dried 10 mL Schlenk tube equipped with a magnetic stirring bar was cooled to room temperature. To this flask were added  $\text{Pd}_2(\text{dba})_3$  (4.6 mg, 0.0050 mmol, 0.05 equiv), **L4** (12.1 mg, 0.0200 mmol, 0.2 equiv), *o*-F- $\text{BzOH}$  (2.8 mg, 0.020 mmol, 0.2 equiv) and 4 Å MS (100.0 mg), and the flask was evacuated and back-filled three times with argon. Then toluene (0.5 mL) was added by syringe. The mixture was stirred at 30 °C for 10

min. To another dry tube equipped with a magnetic stirring bar were added *tert*-butyl (6-cyano-2-methylene-2,3-dihydro-1*H*-inden-1-yl) carbonate **1g** (27.1 mg, 0.100 mmol, 1.0 equiv) and (*Z*)-2-benzylidenebenzo[*b*]thiophen-3(2*H*)-one **10** (28.6 mg, 0.120 mmol, 1.2 equiv), evacuated and back-filled three times with argon. Then toluene (0.5 mL) was added by syringe. The mixture was stirred at rt for 5 min. Then the latter solution was added to the first Schlenk tube by syringe. The mixture was stirred at 30 °C for 6 h. After completion, the solvent was evaporated in vacuo. The residue was purified by flash chromatography on silica gel (EtOAc/petroleum ether = 1/15) to give the unisomerized [10+2] product. The unisomerized [10+2] product was dissolved in toluene (0.5ml), and Et<sub>3</sub>N (2.8 μL, 0.020 mmol, 0.2 equiv) was added to the reaction mixture. The mixture was stirred at rt for 2 h. After completion, the solvent was evaporated in vacuo. The residue was purified by flash chromatography on silica gel (EtOAc/petroleum ether = 1/10) to give product **12**: 18.4 mg, 47% yield, as a white solid; mp: 67–69 °C;  $[\alpha]_D^{25} = +112.0$  ( $c = 0.6$  in CHCl<sub>3</sub>); 86% ee, determined by HPLC analysis [Chiralpak IA, *n*-hexane/*i*-PrOH = 95/5, 1.0 mL min<sup>-1</sup>,  $\lambda = 254$  nm,  $t$  (minor) = 30.94 min,  $t$  (major) = 32.53 min]; **<sup>1</sup>H NMR** (600 MHz, CDCl<sub>3</sub>):  $\delta$  (ppm) 7.88–7.76 (m, 1H), 7.69 (d,  $J = 3.6$  Hz, 1H), 7.54–7.36 (m, 2H), 7.25–7.18 (m, 4H), 7.14 (dd,  $J = 8.4, 4.2$  Hz, 1H), 7.03–7.00 (m, 2H), 6.86 (dd,  $J = 8.4, 4.2$  Hz, 1H), 4.85 (s, 1H), 3.65–3.51 (m, 2H), 3.46 (d,  $J = 23.4$  Hz, 1H), 3.35 (d,  $J = 23.4$  Hz, 1H); **<sup>13</sup>C NMR** (150 MHz, CDCl<sub>3</sub>):  $\delta$  (ppm) 203.8, 153.4, 152.1, 148.3, 147.1, 144.9, 137.6, 136.1, 131.2, 129.6, 129.0, 128.8, 128.3, 127.8, 127.3, 127.1, 124.8, 123.8, 120.1, 119.9, 107.4, 56.1, 44.4, 35.6; **HRMS** (ESI-TOF)  $m/z$ : [M +H]<sup>+</sup> Calcd for C<sub>26</sub>H<sub>18</sub>NOS<sup>+</sup> 392.1104; Found 392.1109.

## 6. More screening studies for substrate scope

### 6.1 More screening studies on other allylic alcohols

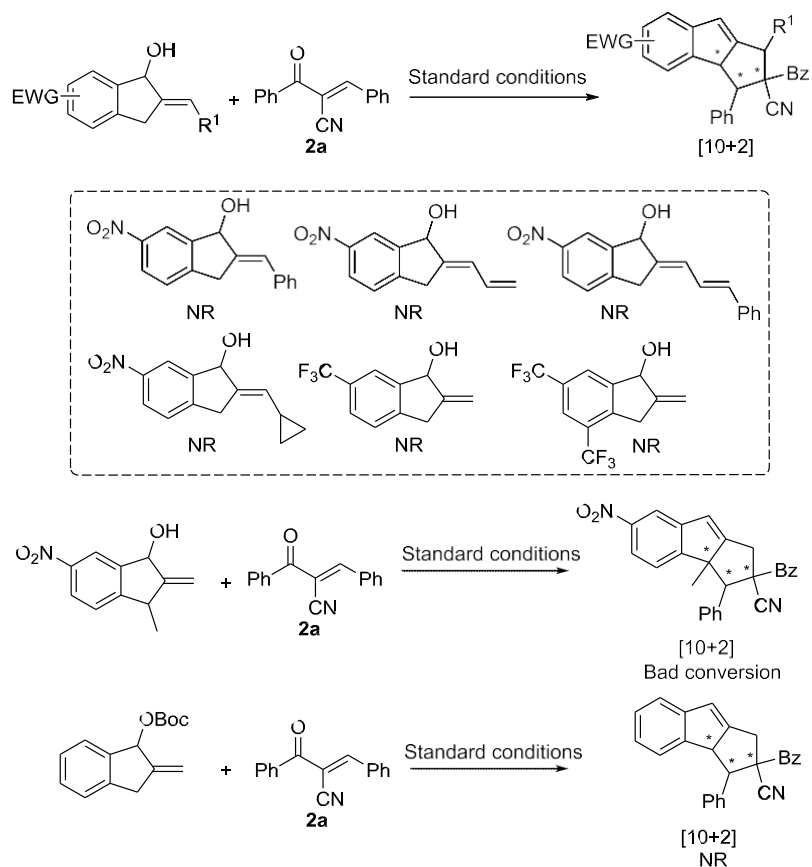

Reactions were performed with allylic alcohol or allyl *tert*-butyl carbonate (0.1 mmol), activated alkene **2a** (0.12 mmol), Pd<sub>2</sub>(dba)<sub>3</sub> (5 mol%), **L4** (20 mol%), acid (*S*-**A1**) (20 mol%) and 4 Å MS (100 mg) in toluene (1 mL) at 30 °C.

## 6.2 More screening studies on activated alkenes 2

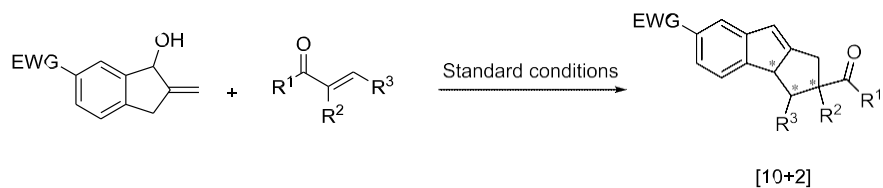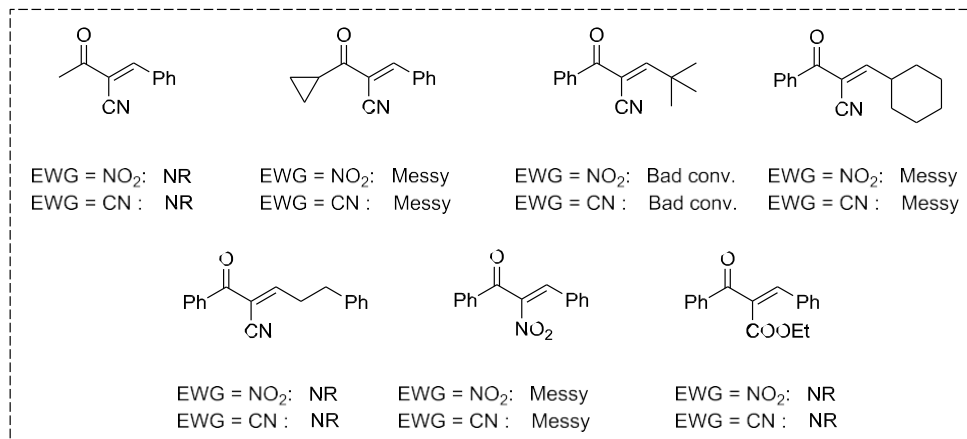

Reactions were performed with allylic alcohol (0.1 mmol), activated alkene **2** (0.12 mmol), Pd<sub>2</sub>(dba)<sub>3</sub> (5 mol%), **L4** (20 mol%), acid (*S*)-**A1** (20 mol%) and 4 Å MS (100 mg) in toluene (1 mL) at 30 °C.

### 6.3 More screening studies on troponone derivatives

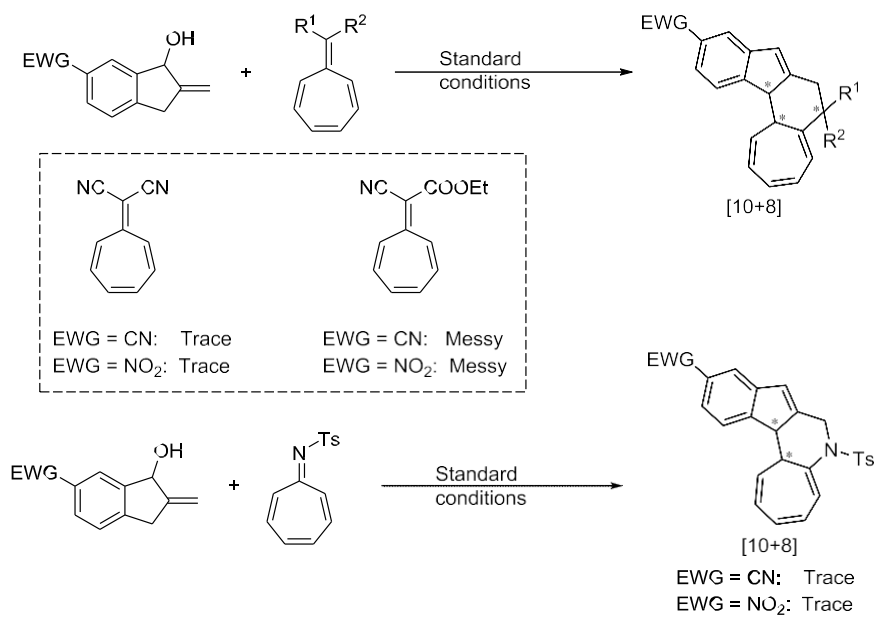

Reactions were performed with allylic alcohol (0.1 mmol), troponone derivative (0.12 mmol), Pd<sub>2</sub>(dba)<sub>3</sub> (5 mol%), **L4** (20 mol%), acid (*S*)-**A1** (20 mol%) and 4 Å MS (100 mg) in toluene (1 mL) at 30 °C.

## 6.4 More screening studies on other electrophiles

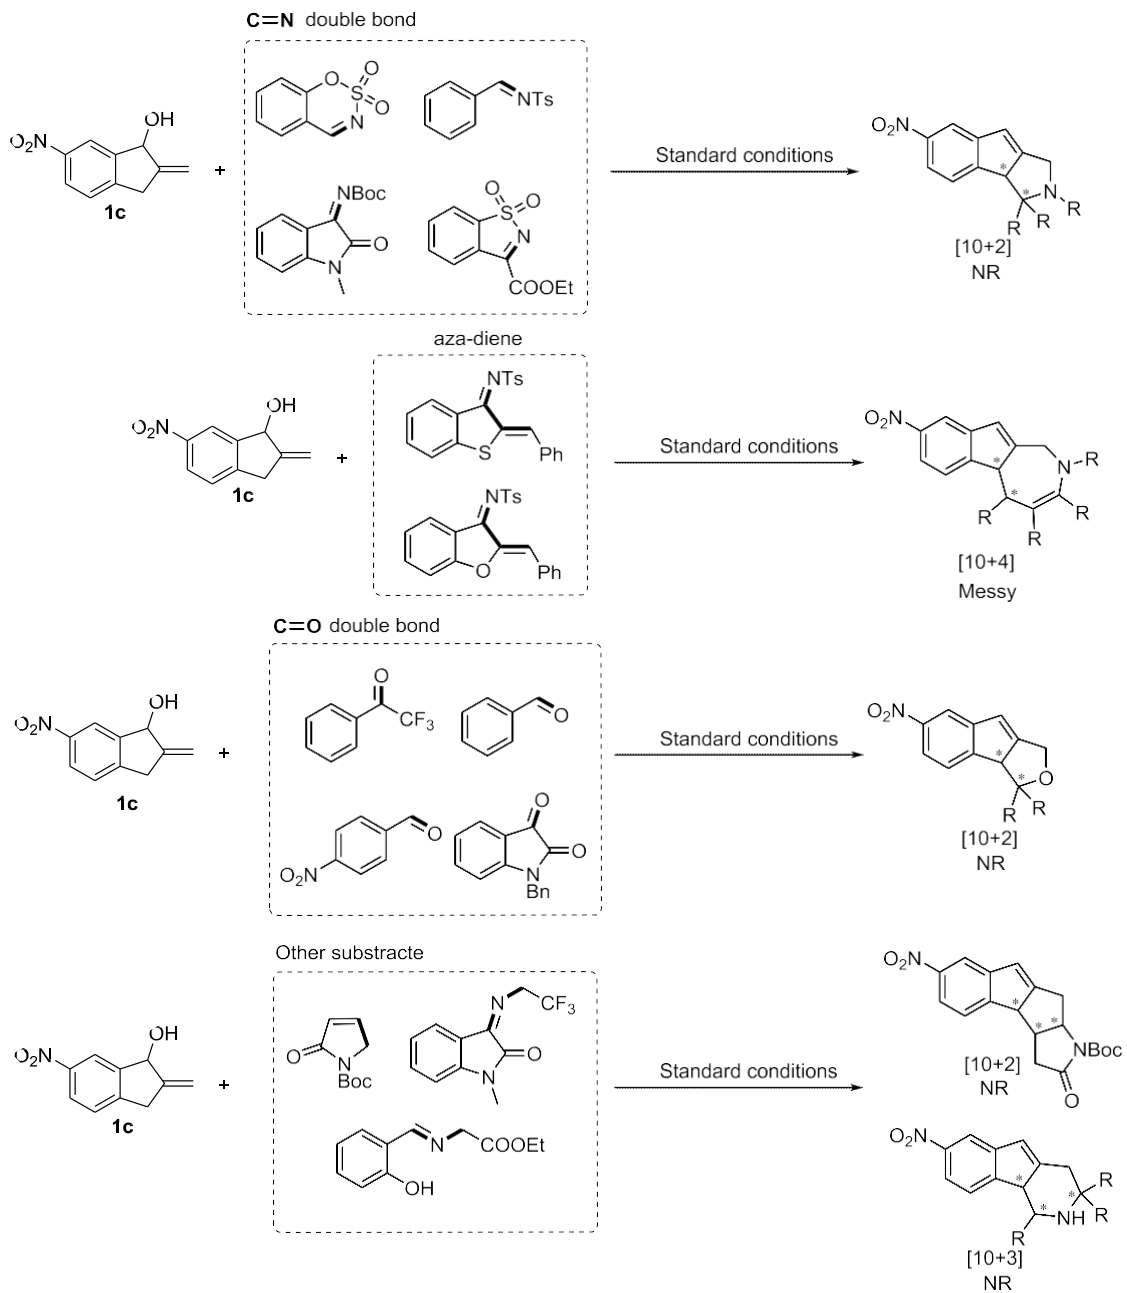

Reactions were performed with allylic alcohol **1c** (0.1 mmol), electrophile (0.12 mmol), Pd<sub>2</sub>(dba)<sub>3</sub> (5 mol%), **L4** (20 mol%), acid (*S*)-**A1** (20 mol%) and 4 Å MS (100 mg) in toluene (1 mL) at 30 °C.



## 7. Asymmetric reaction on a 1.0 mmol scale

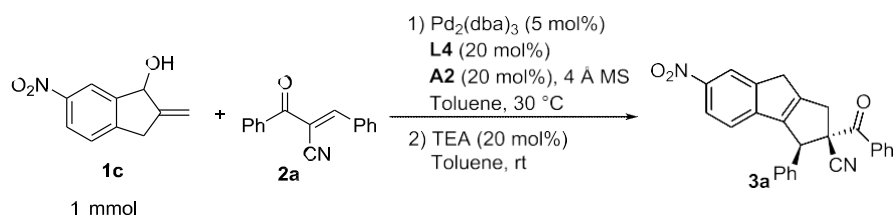

A flame-dried 10 mL Schlenk tube equipped with a magnetic stirring bar was cooled to room temperature. To this flask were added  $\text{Pd}_2(\text{dba})_3$  (45.8 mg, 0.0500 mmol, 0.05 equiv), **L4** (121.1 mg, 0.2001 mmol, 0.2 equiv), **A2** (50.0 mg, 0.200 mmol, 0.2 equiv) and 4 Å MS (1.0 g), and the flask evacuated and back-filled three times with argon. Then toluene (5 mL) was added by syringe. The mixture was stirred at 30 °C for 10 min. To another dry tube equipped with a magnetic stirring bar were added 2-methylene-6-nitro-2,3-dihydro-1*H*-inden-1-ol **1c** (191.1 mg, 1.000 mmol, 1.0 equiv) and (*E*)-2-benzoyl-3-phenylacrylonitrile **2a** (279.7 mg, 1.200 mmol, 1.2 equiv), evacuated and back-filled three times with argon. Then toluene (5 mL) was added by syringe. The mixture was stirred at rt for 5 min. Then the latter solution was added to the first Schlenk tube by syringe. The mixture was stirred at 30 °C for 12 h. After completion,  $\text{Et}_3\text{N}$  (28.0  $\mu\text{L}$ , 0.202 mmol, 0.2 equiv) was added to the reaction mixture and stirred at rt for 2 h. After completion, the solvent was evaporated in vacuo. The residue was purified by flash chromatography on silica gel (EtOAc/petroleum ether = 1/8) to give the product **3a**: 370.7 mg, 91% yield, as a yellow solid; >19:1 dr; 88% ee.

## 8. Crystal data and structural refinement for enantiopure **3a**

Preparation of the single crystals of enantiopure **3a**: 35.0 mg of compound **3a** (91% ee) was dissolved in DCM (1.0 mL) in a 10 mL tube, and *n*-hexane (3.0 mL) was added. The tube was sealed by a piece of weighing paper with several tiny holes, thus allowing slow evaporation of the solvents at room temperature. After 4 days, several small particles could be observed at the bottom of the tube. The crystals were chosen and subjected to the single crystal X-ray diffraction analysis for the determination of the absolute configuration of **3a**. The data were collected by an Agilent Gemini equipped with a Cu radiation source ( $K\alpha = 1.54184 \text{ \AA}$ ) at 296.0(9) K. CCDC 2174555 (**3a**) contains the supplementary crystallographic data for this paper. These data can be obtained free of charge via [www.ccdc.cam.ac.uk/data\\_request/cif](http://www.ccdc.cam.ac.uk/data_request/cif).

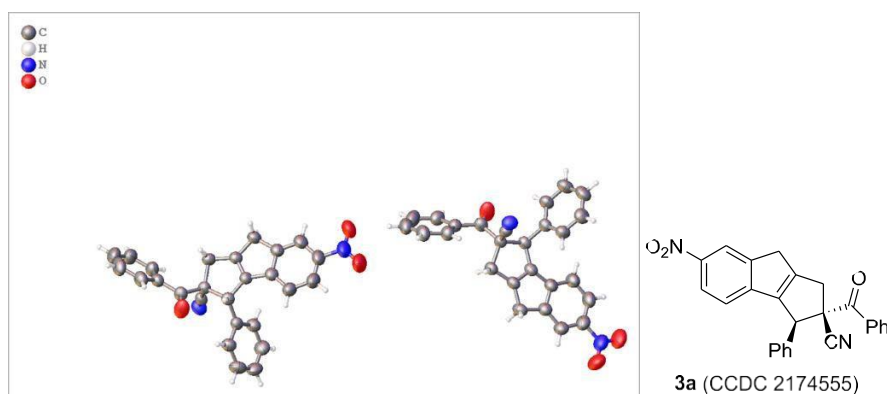

(ellipsoid contour probability 50%)

|                                  |                               |
|----------------------------------|-------------------------------|
| Identification code              | <b>3a</b>                     |
| Empirical formula                | $C_{26}H_{18}N_2O_3$          |
| Formula weight                   | 406.42                        |
| Temperature/K                    | 296.0(9)                      |
| Crystal system                   | monoclinic                    |
| Space group                      | $P2_1$                        |
| $a/\text{\AA}$                   | 6.34570(7)                    |
| $b/\text{\AA}$                   | 12.49324(16)                  |
| $c/\text{\AA}$                   | 29.7405(4)                    |
| $\alpha/^\circ$                  | 90                            |
| $\beta/^\circ$                   | 93.4861(11)                   |
| $\gamma/^\circ$                  | 90                            |
| Volume/ $\text{\AA}^3$           | 2353.41(5)                    |
| $Z$                              | 4                             |
| $\rho_{\text{calc}}/\text{cm}^3$ | 1.147                         |
| $\mu/\text{mm}^{-1}$             | 0.613                         |
| $F(000)$                         | 848.0                         |
| Crystal size/ $\text{mm}^3$      | $0.45 \times 0.35 \times 0.3$ |

|                                                |                                                                  |
|------------------------------------------------|------------------------------------------------------------------|
| Radiation                                      | CuK $\alpha$ ( $\lambda = 1.54184$ )                             |
| 2 $\Theta$ range for data collection/ $^\circ$ | 7.678 to 142.826                                                 |
| Index ranges                                   | $-7 \leq h \leq 5$ , $-15 \leq k \leq 15$ , $-33 \leq l \leq 36$ |
| Reflections collected                          | 25763                                                            |
| Independent reflections                        | 9006 [ $R_{\text{int}} = 0.0406$ , $R_{\text{sigma}} = 0.0314$ ] |
| Data/restraints/parameters                     | 9006/1/559                                                       |
| Goodness-of-fit on $F^2$                       | 1.037                                                            |
| Final R indexes [ $I \geq 2\sigma(I)$ ]        | $R_1 = 0.0505$ , $wR_2 = 0.1373$                                 |
| Final R indexes [all data]                     | $R_1 = 0.0543$ , $wR_2 = 0.1426$                                 |
| Largest diff. peak/hole / $e \text{ \AA}^{-3}$ | 0.15/-0.24                                                       |
| Flack parameter                                | -0.01(14)                                                        |

## 9. Mechanism study

### 9.1 Control experiments

#### a) The formation of **3a** with 5-nitro **1e** as the substrate

When 5-nitro **1e** was utilised as the substrate, **3a** was isolated in a moderate yield after treatment with Et<sub>3</sub>N. The results indicated an isomerisation process of the 10π-intermediate would be involved. Under the catalysis of Pd/**A2**, **1e** underwent an oxidative addition/deprotonation to give intermediate **I'**, which would isomerise to the more stable intermediate **I** to afford **3a** followed by [10+2] cycloaddition with **2a** and isomerisation.

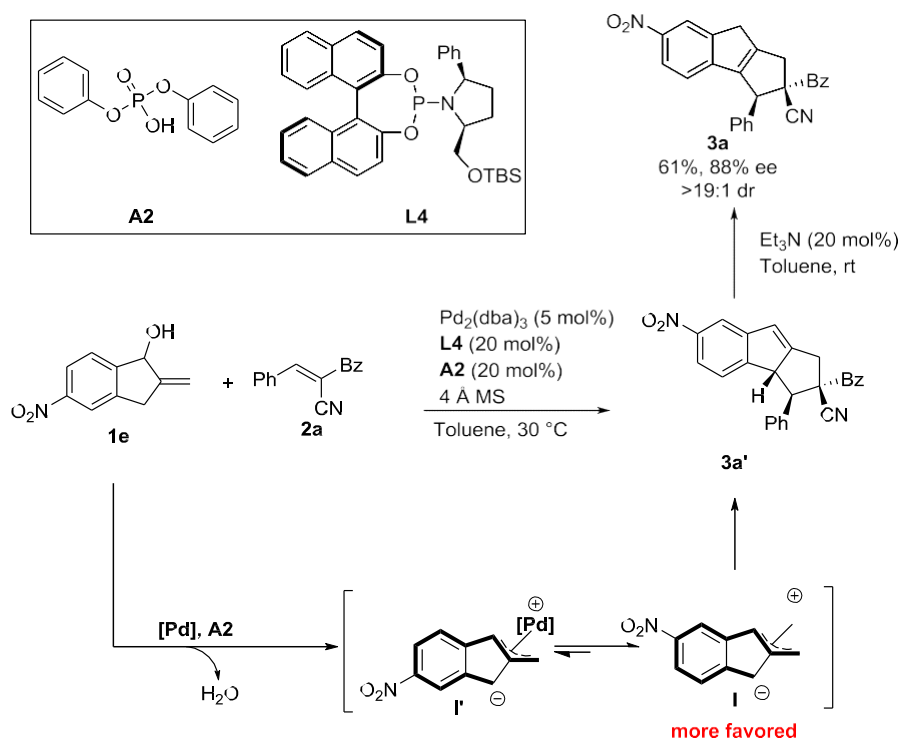

#### b) With acyclic alcohol **13** as the substrate

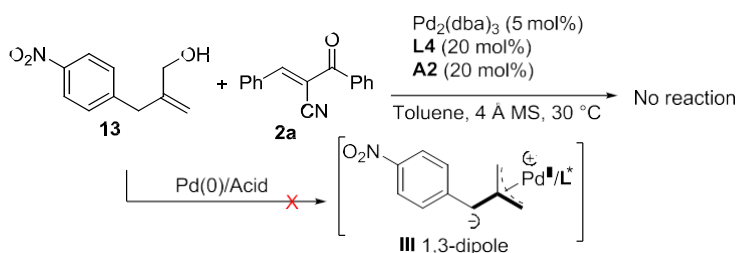

## 9.2 The formation of 3s with 1d as the substrate

When **1d** with a 4-nitro group was applied to the reaction with **2a** under the standard conditions, **3s** (confirmed by  $^1\text{H}$  NMR and  $^{13}\text{C}$  NMR) was obtained in a quantitative yield with good enantioselectivity, and no isomerisation phenomenon for the zwitterionic intermediate was observed. It was envisaged that **1d** underwent oxidative addition and deprotonation reaction, and resultant intermediate **V** was formed. The anion at the C-3 position could be stabilised by the *ortho*-NO<sub>2</sub> group; in contrast, intermediate **VI** would be relatively less stable. Indeed, cycloadduct **3s''** has not been detected, indicating that the isomerisation process was not favored. Instead, **V** participated in [10+2] cycloaddition with **2a** to give **3s'**, and then **3s** was finally afforded after treatment with Et<sub>3</sub>N.

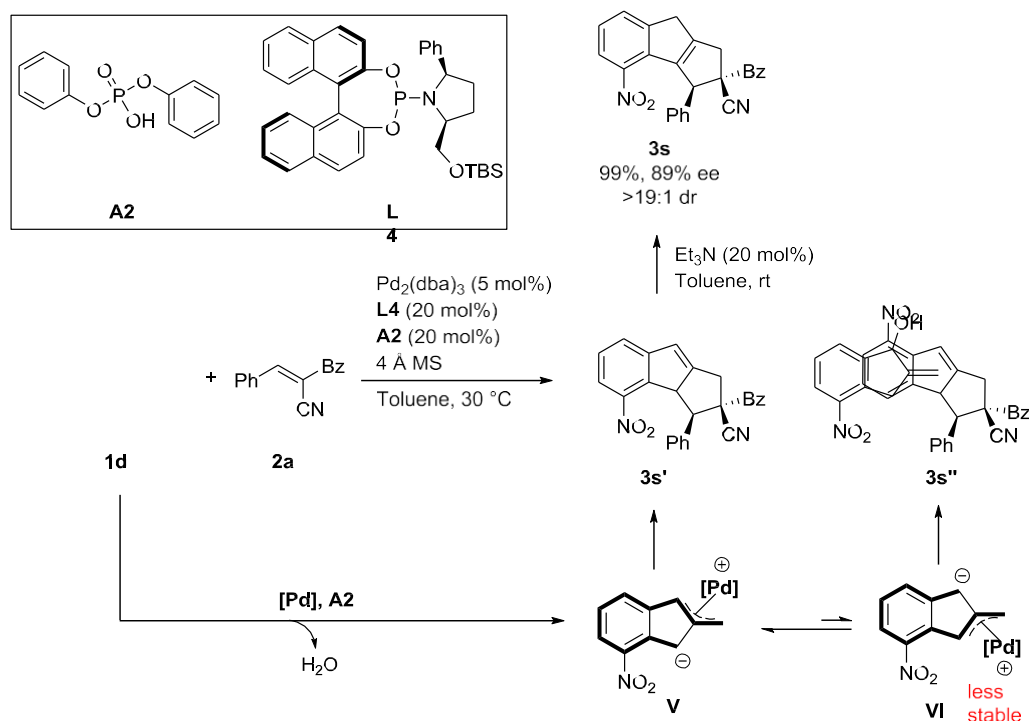

### 9.3 Proposed catalytic cycle

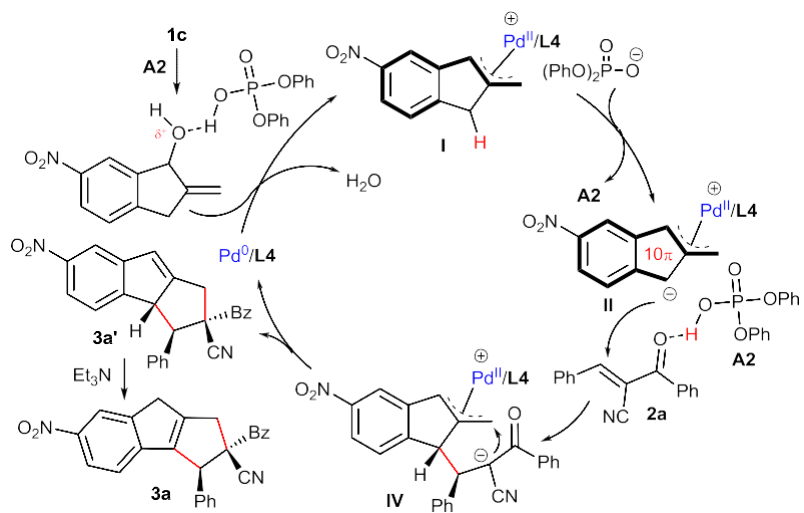

## 10. References

1. P. Zhao, Z. Li, J. He, X. Liu and X. Feng, *Sci. China Chem.*, 2021, **64**, 1355.
2. Y. Yang, Y. Jiang, W. Du and Y.-C. Chen, *Chem. - Eur. J.*, 2020, **26**, 1754.
3. K.-K. Wang, P. Wang, Q. Ouyang, W. Du and Y.-C. Chen, *Chem. Commun.*, 2016, **52**, 11104.
4. E. Fillion, A. Kavooosi, K. Nguyen and C. Ieritano, *Chem. Commun.*, 2016, **52**, 12813.
5. T. Drennhaus, L. Öhler, S. Djalali, S. Höfmann, C. Müller, J. Pietruszka and D. Worgull, *Adv. Synth. Catal.*, 2020, **362**, 2385.
6. Z.-Z. Gao, C. Wang, L.-J. Zhou, C.-H. Yuan, Y.-M. Xiao and H.-C. Guo, *Org. Lett.*, 2018, **20**, 4302.
7. T. B. Nguyen and P. Retailleau, *Org. Lett.*, 2018, **20**, 186.
8. A. Turočkin, W. Raven and P. Selig, *Eur. J. Org. Chem.*, 2017, 296.

# 11. NMR, HRMS spectra and HPLC chromatograms

7.416  
7.418  
7.388  
7.389  
7.352  
7.236  
7.197  
7.196  
7.179  
7.169  
6.811

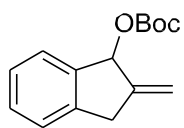

**1a**

$^1\text{H}$  NMR (400 MHz,  $\text{CDCl}_3$ )

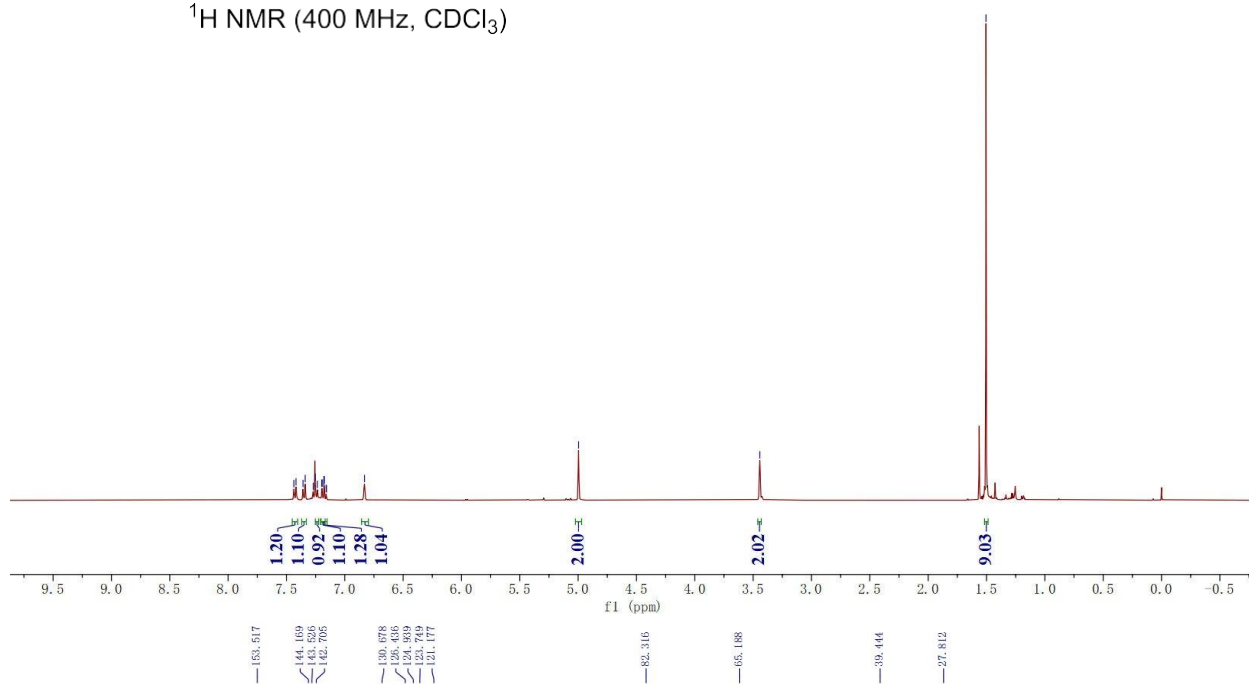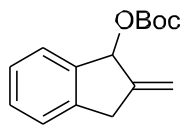

**1a**

$^{13}\text{C}$  NMR (100 MHz,  $\text{CDCl}_3$ )

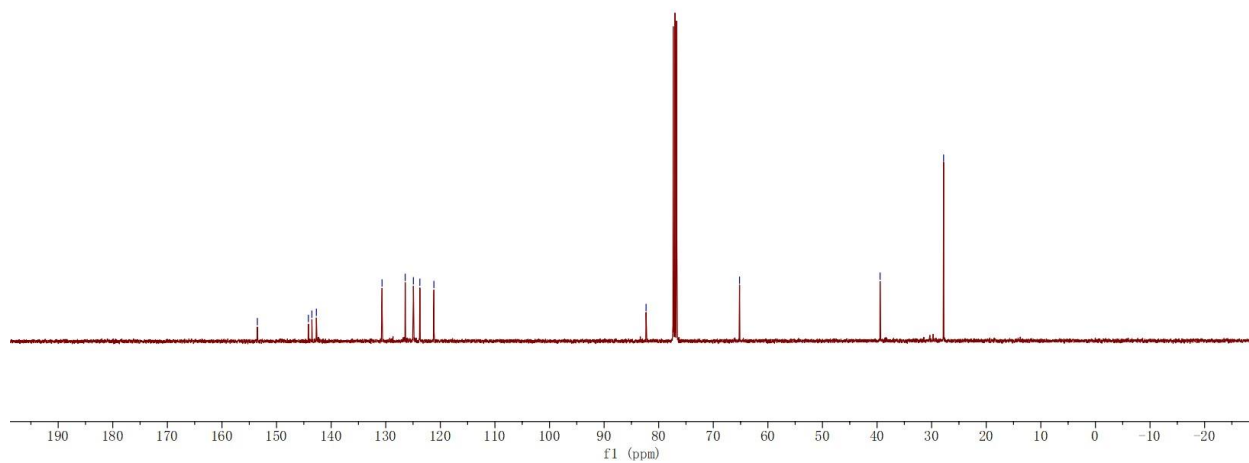



# User Spectrum Plot Report

|                |                |              |             |            |                 |                   |                                  |
|----------------|----------------|--------------|-------------|------------|-----------------|-------------------|----------------------------------|
| Name           | CYC-220516-1   | Rack Pos.    |             | Instrument | Instrument 1    | Operator          |                                  |
| Inj. Vol. (ul) | 8              | Plate Pos.   |             | IRM Status | All ions missed |                   |                                  |
| Data File      | CYC-220516-1.d | Method (Acq) | CJH220516.m | Comment    |                 | Acq. Time (Local) | 5/20/2022 3:19:41 PM (UTC+08:00) |

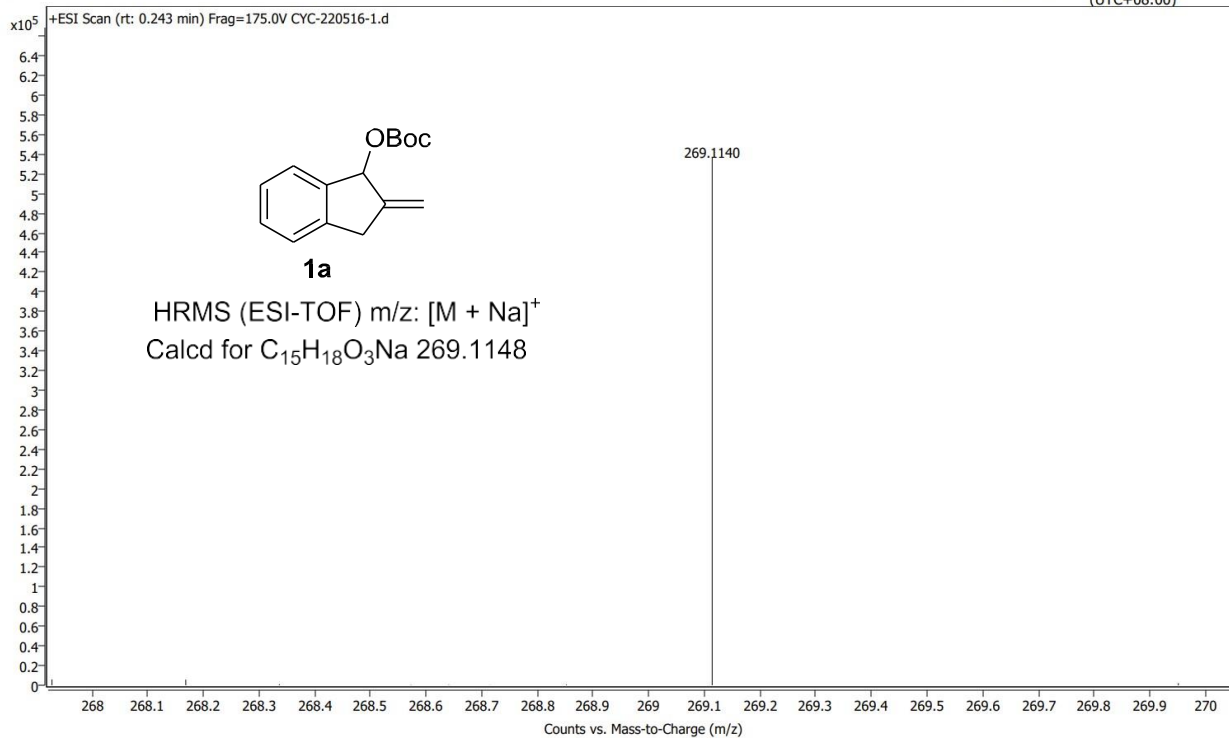

8.346  
8.213  
8.199  
7.420  
7.406  
6.622  
5.605  
5.488  
3.904  
3.689  
3.651  
1.526

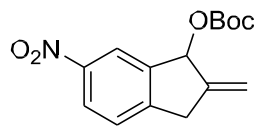

**1b**

<sup>1</sup>H NMR (600 MHz, CDCl<sub>3</sub>)

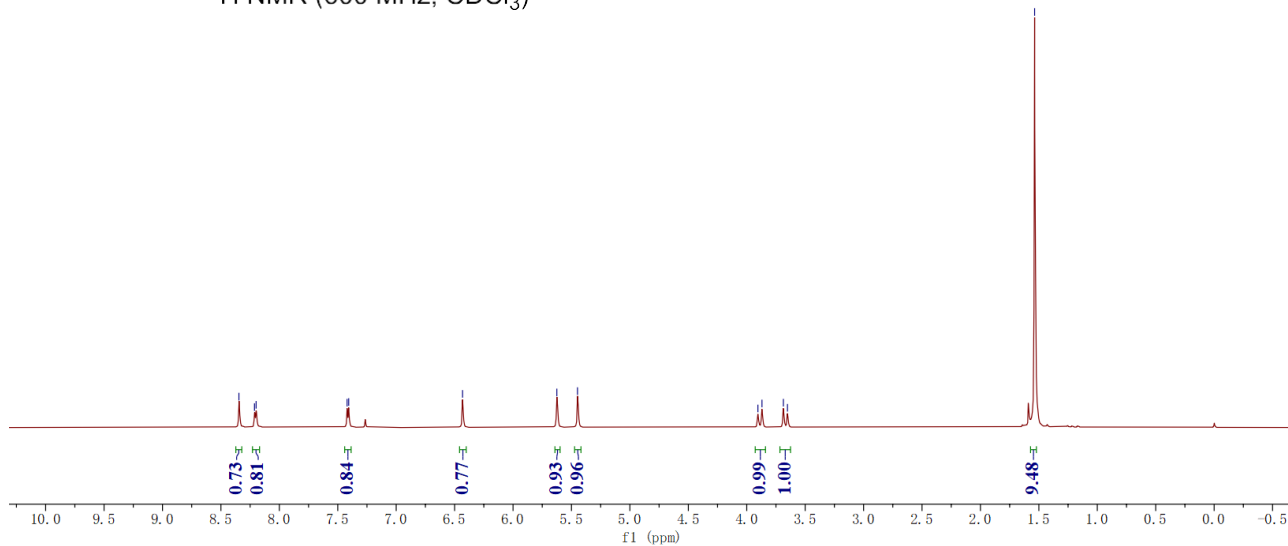

153.373  
149.944  
146.215  
141.622  
126.421  
124.788  
121.513  
115.465  
83.077  
78.831  
38.844  
27.751  
27.393

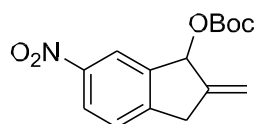

**1b**

<sup>13</sup>C NMR (150 MHz, CDCl<sub>3</sub>)

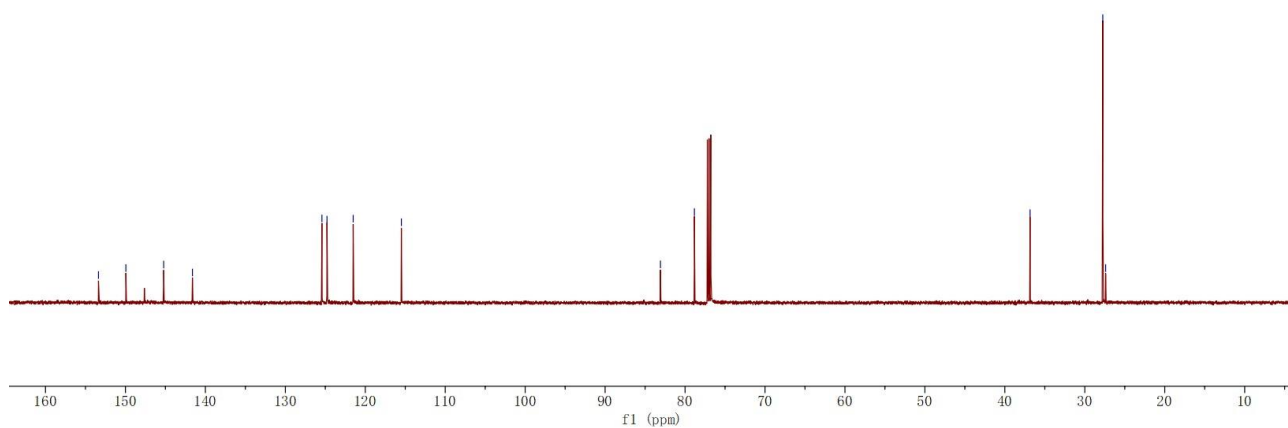

# User Spectrum Plot Report

|                |                |              |             |                 |                                  |
|----------------|----------------|--------------|-------------|-----------------|----------------------------------|
| Name           | CYC-220516-3   | Rack Pos.    | Instrument  | Instrument 1    | Operator                         |
| Inj. Vol. (ul) | 8              | Plate Pos.   | IRM Status  | All ions missed |                                  |
| Data File      | CYC-220516-3.d | Method (Acq) | CJH220516.m |                 | Acq. Time (Local)                |
|                |                |              |             |                 | 5/20/2022 3:25:35 PM (UTC+08:00) |

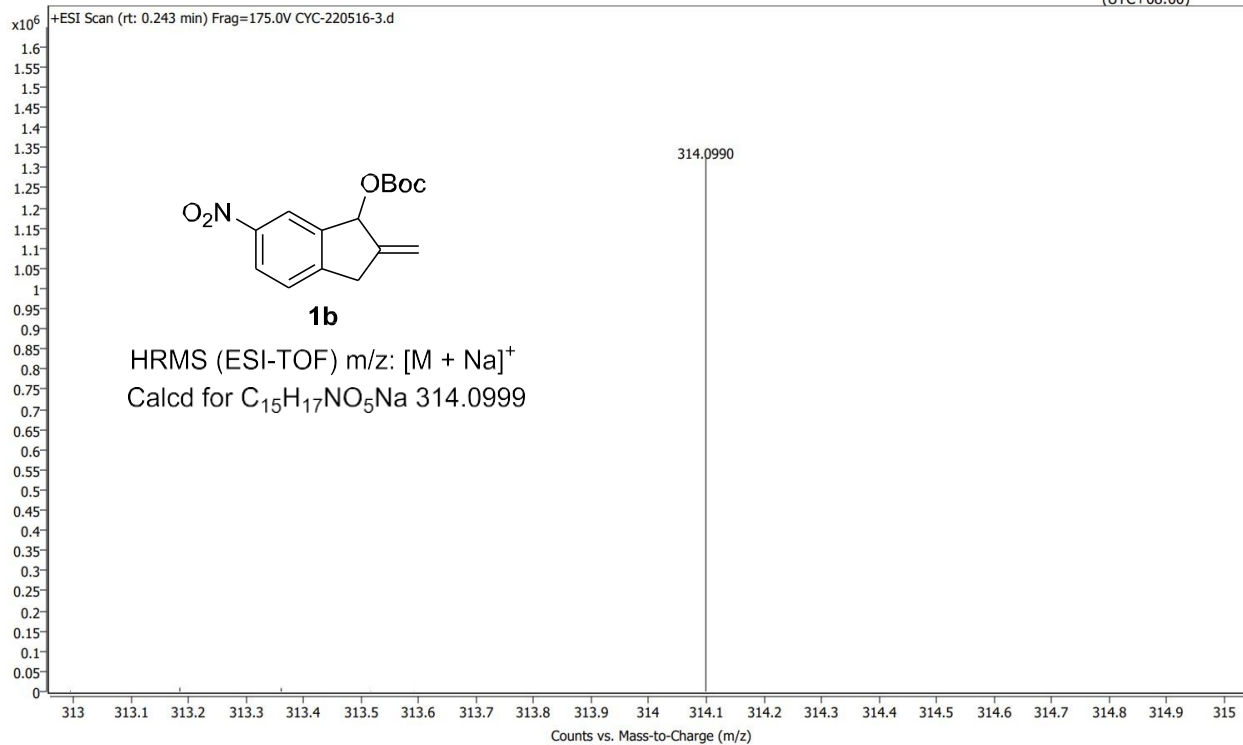

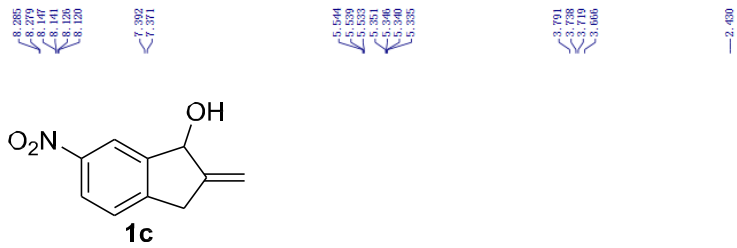

<sup>1</sup>H NMR (400 MHz, CDCl<sub>3</sub>)

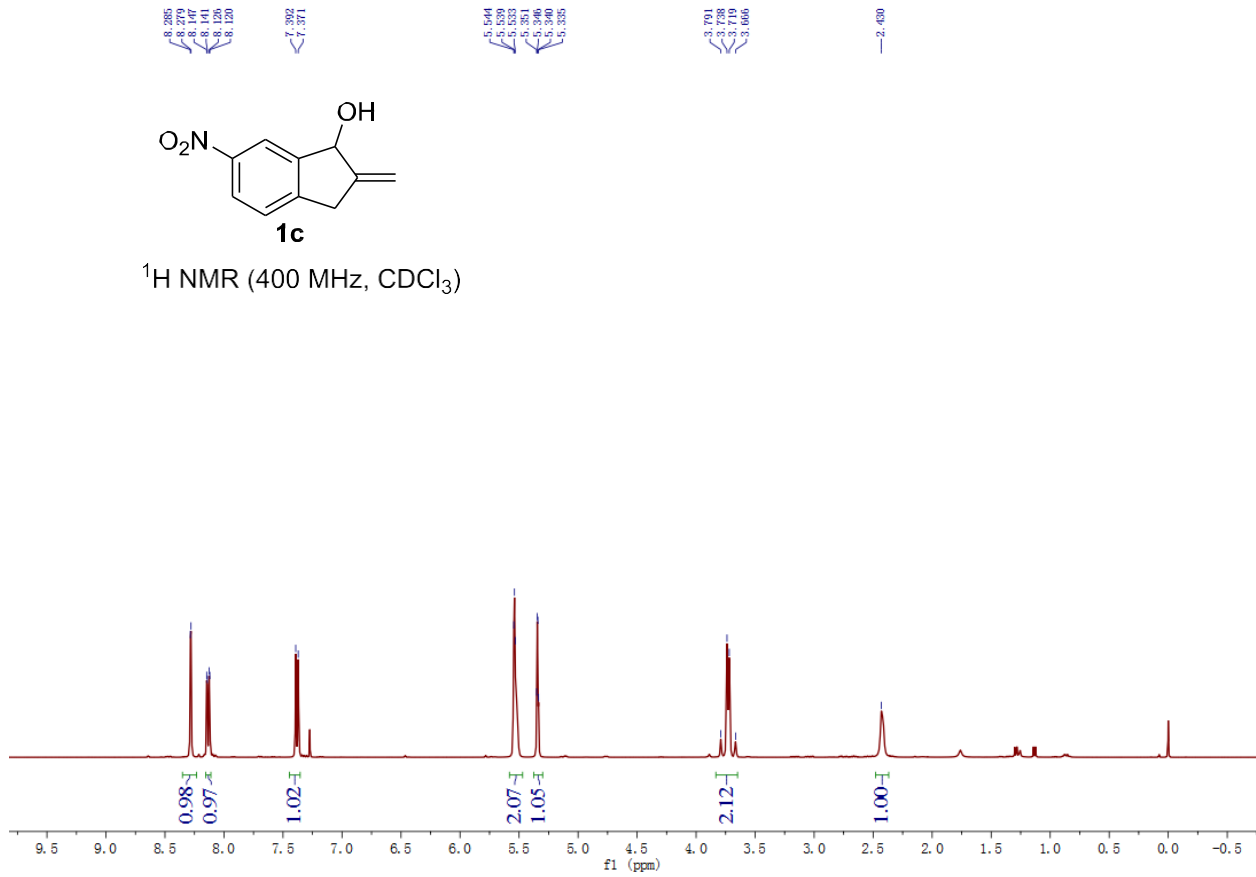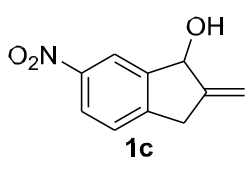

<sup>13</sup>C NMR (100 MHz, CDCl<sub>3</sub>)

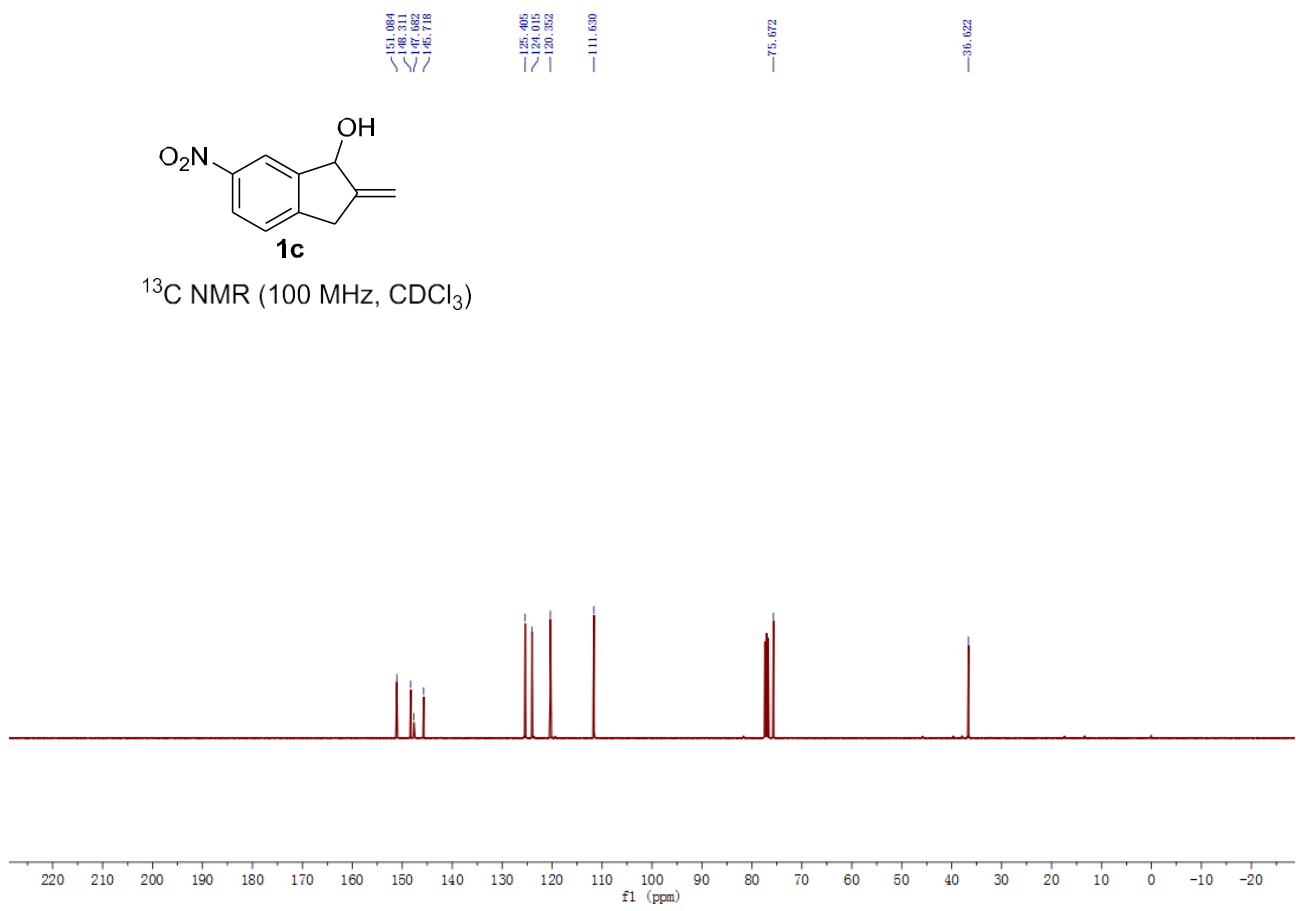

# Spectrum Plot Report

|                |                   |              |                |            |              |                   |                                   |
|----------------|-------------------|--------------|----------------|------------|--------------|-------------------|-----------------------------------|
| Name           | CYC-20201231-16   | Rack Pos.    |                | Instrument | Instrument 1 | Operator          |                                   |
| Inj. Vol. (ul) | 8                 | Plate Pos.   |                | IRM Status | Success      |                   |                                   |
| Data File      | CYC-20201231-16.d | Method (Acq) | ZYJ-20201106.m | Comment    |              | Acq. Time (Local) | 12/24/2020 6:30:34 PM (UTC+08:00) |

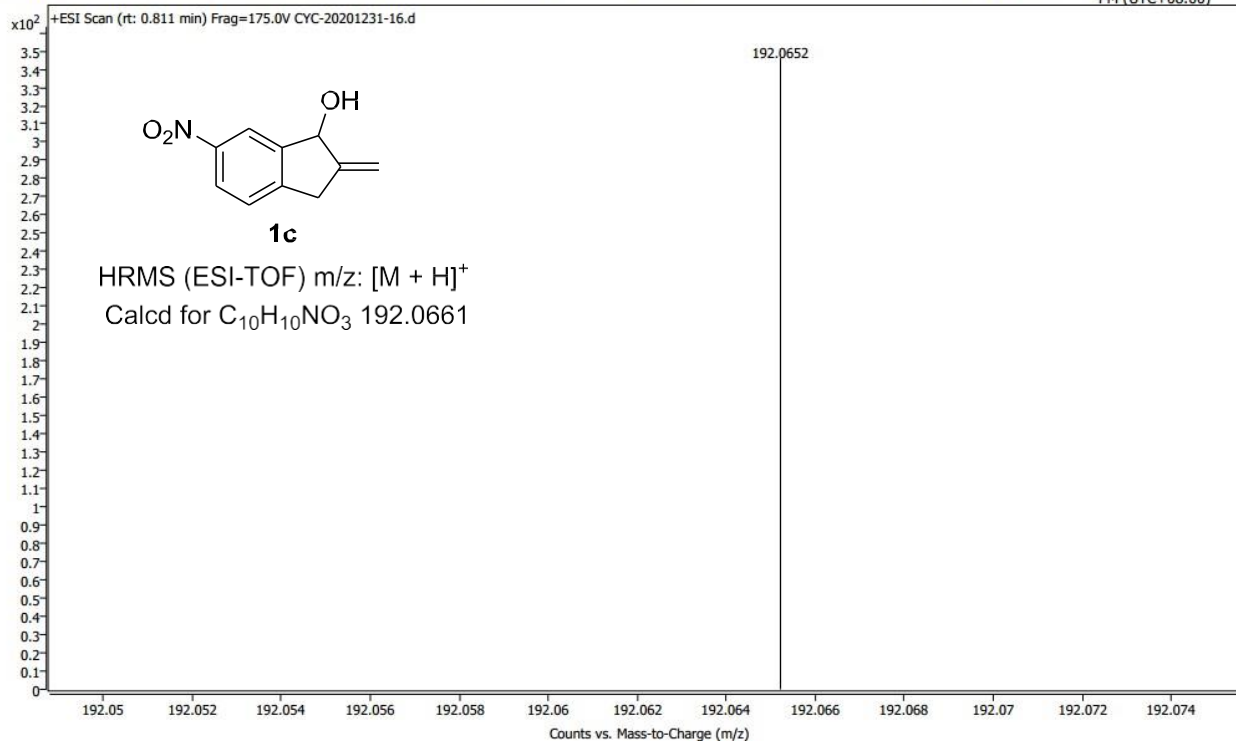

8.159  
8.138  
7.791  
7.773  
7.487  
7.468  
5.543  
5.531  
5.517  
5.396  
5.386  
5.379  
4.208  
4.183  
4.069  
4.014  
4.010  
-3.246

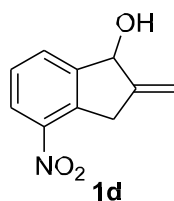

<sup>1</sup>H NMR (400 MHz, CDCl<sub>3</sub>)

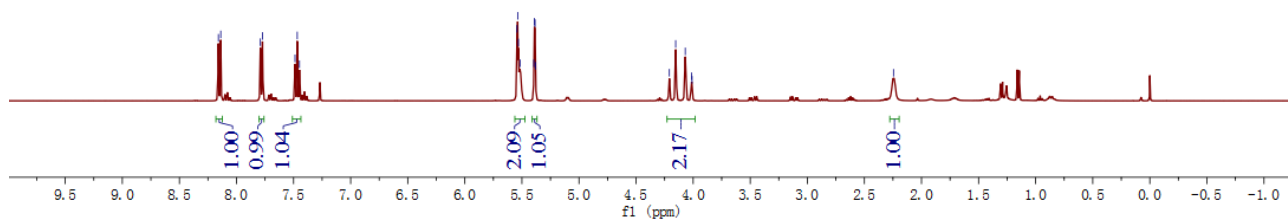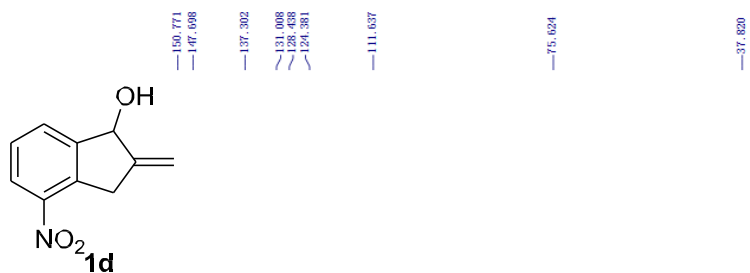

<sup>13</sup>C NMR (100 MHz, CDCl<sub>3</sub>)

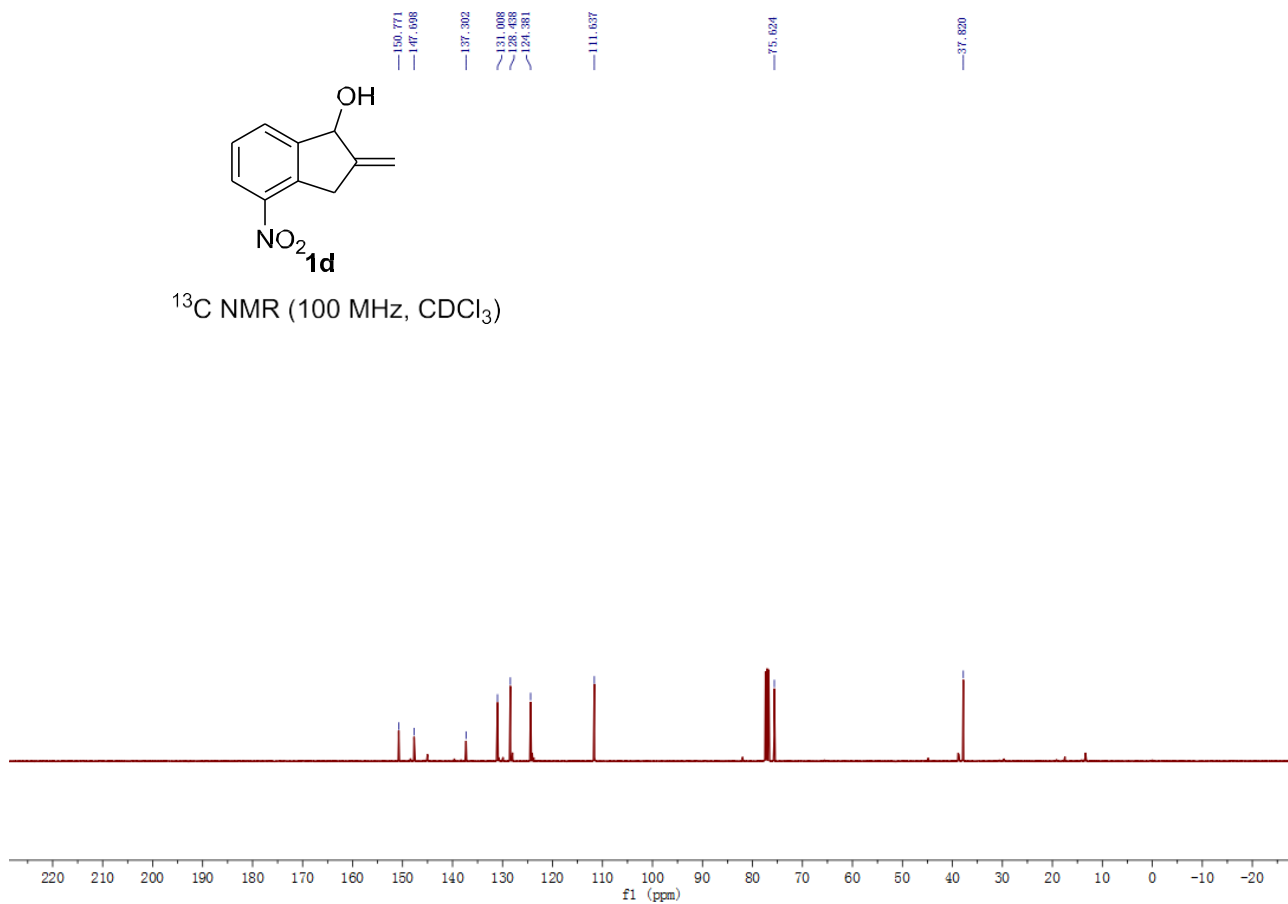

# Spectrum Plot Report

|                |                   |              |                |            |              |                   |                                   |
|----------------|-------------------|--------------|----------------|------------|--------------|-------------------|-----------------------------------|
| Name           | CYC-20201231-18   | Rack Pos.    |                | Instrument | Instrument 1 | Operator          |                                   |
| Inj. Vol. (ul) | 8                 | Plate Pos.   |                | IRM Status | Success      |                   |                                   |
| Data File      | CYC-20201231-18.d | Method (Acq) | ZYJ-20201106.m | Comment    |              | Acq. Time (Local) | 12/24/2020 6:36:32 PM (UTC+08:00) |

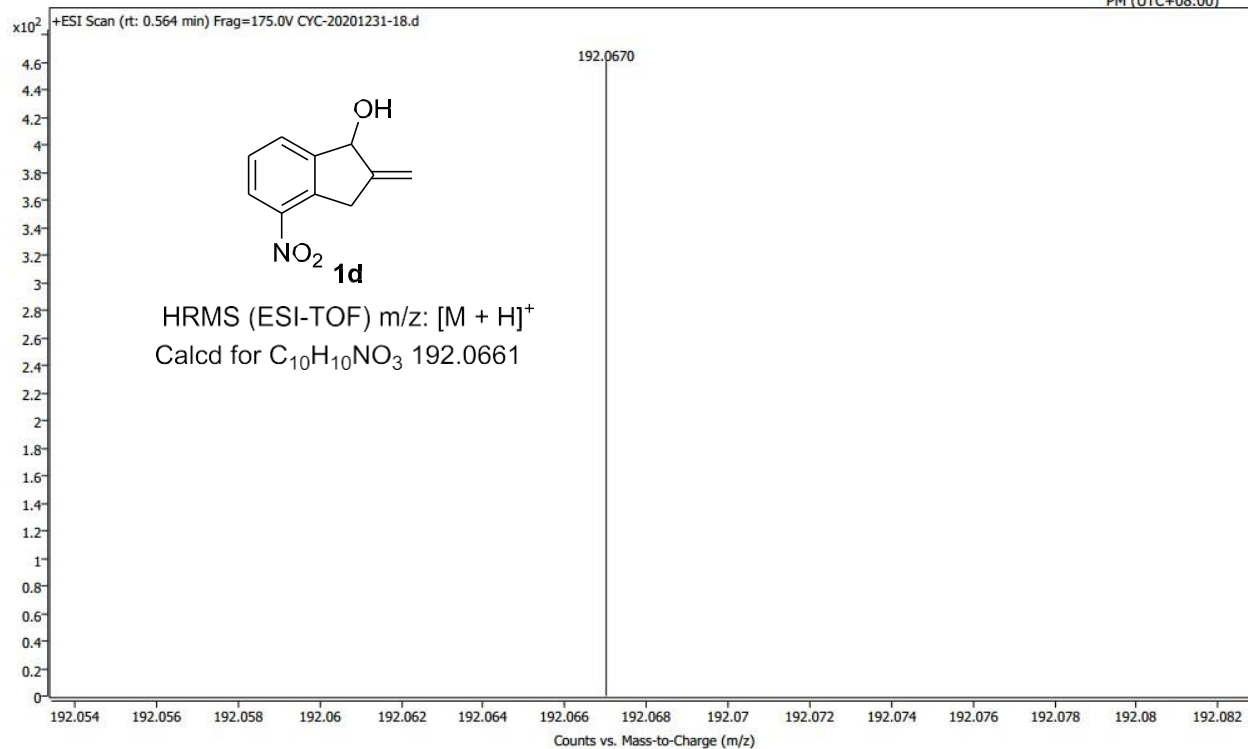

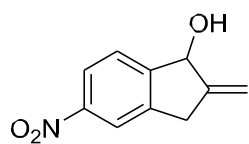

**1e**

$^1\text{H}$  NMR (400 MHz,  $\text{CDCl}_3$ )

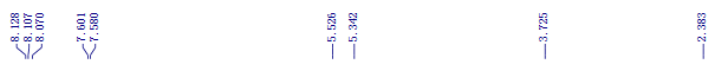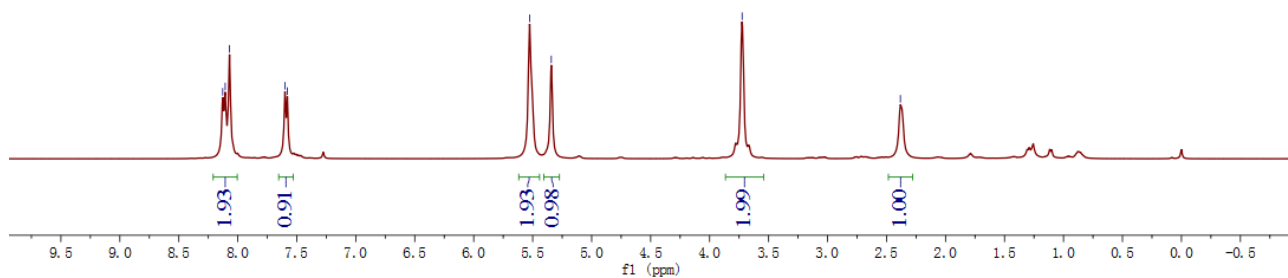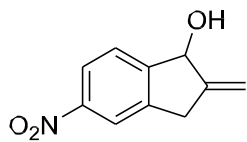

**1e**

$^{13}\text{C}$  NMR (100 MHz,  $\text{CDCl}_3$ )

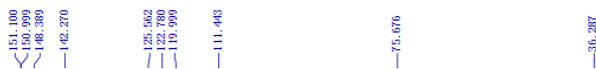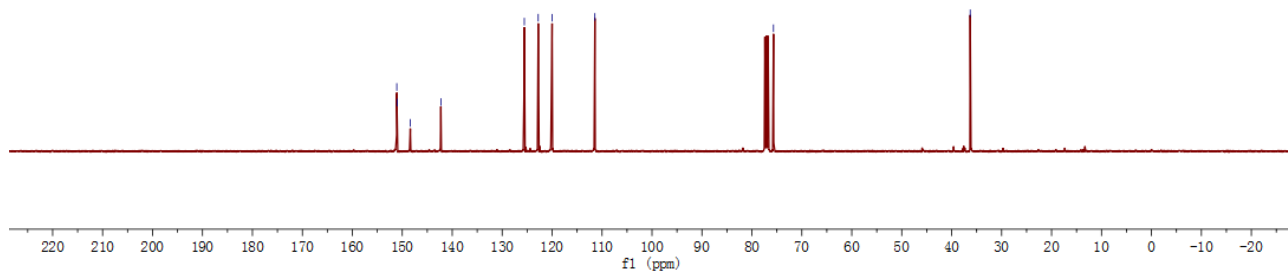



Spectrum from 20220122.wiff2 (sample 90) - 77, +TOF MS (100 - 600) from 0.023 to 0.048 min, subtra...122.wiff2 (sample 90) - 77, +TOF MS (100 - 600) from 1.234 to 1.588 min], Recalibrated, centroided

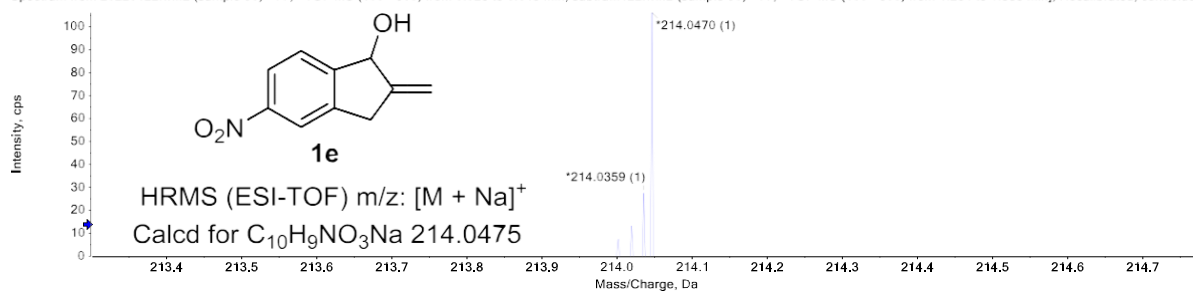

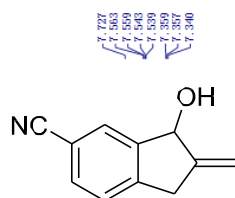

**1f**

$^1\text{H}$  NMR (400 MHz,  $\text{CDCl}_3$ )

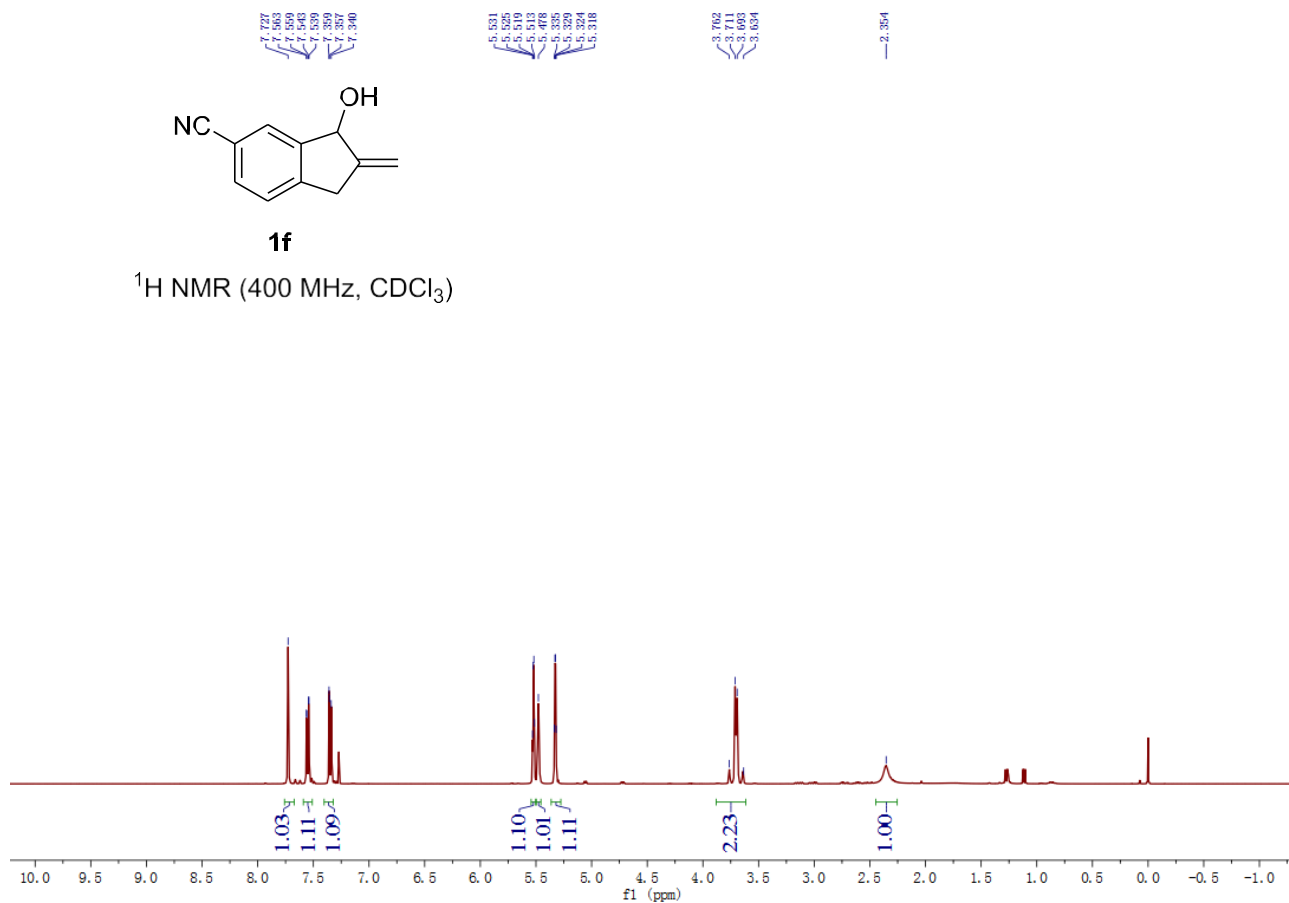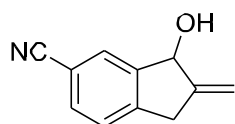

**1f**

$^{13}\text{C}$  NMR (100 MHz,  $\text{CDCl}_3$ )

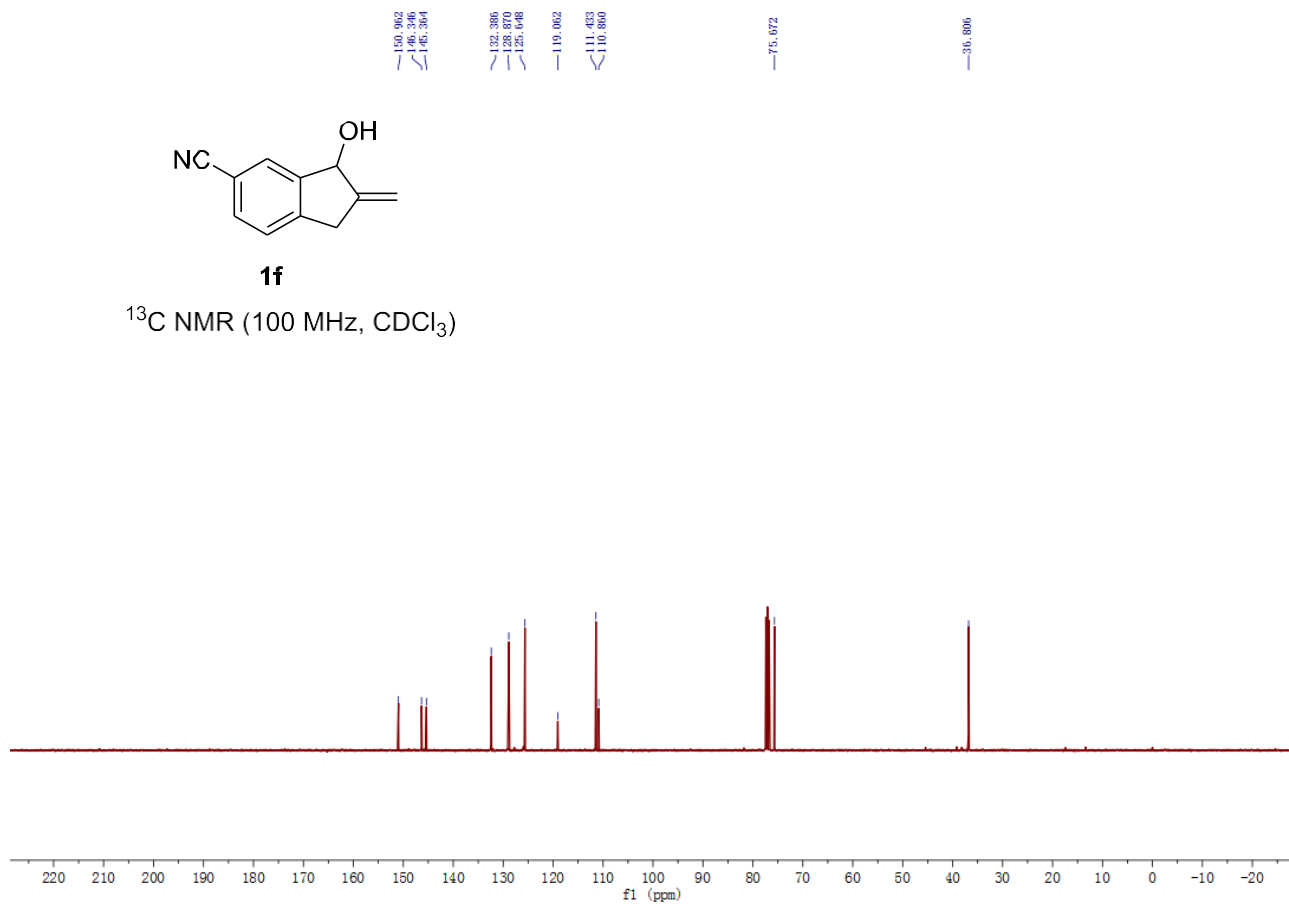

# Spectrum Plot Report

|                |                   |              |                |            |              |                   |                                   |
|----------------|-------------------|--------------|----------------|------------|--------------|-------------------|-----------------------------------|
| Name           | CYC-20201231-17   | Rack Pos.    |                | Instrument | Instrument 1 | Operator          |                                   |
| Inj. Vol. (ul) | 8                 | Plate Pos.   |                | IRM Status | Success      |                   |                                   |
| Data File      | CYC-20201231-17.d | Method (Acq) | ZYJ-20201106.m | Comment    |              | Acq. Time (Local) | 12/24/2020 6:33:33 PM (UTC+08:00) |

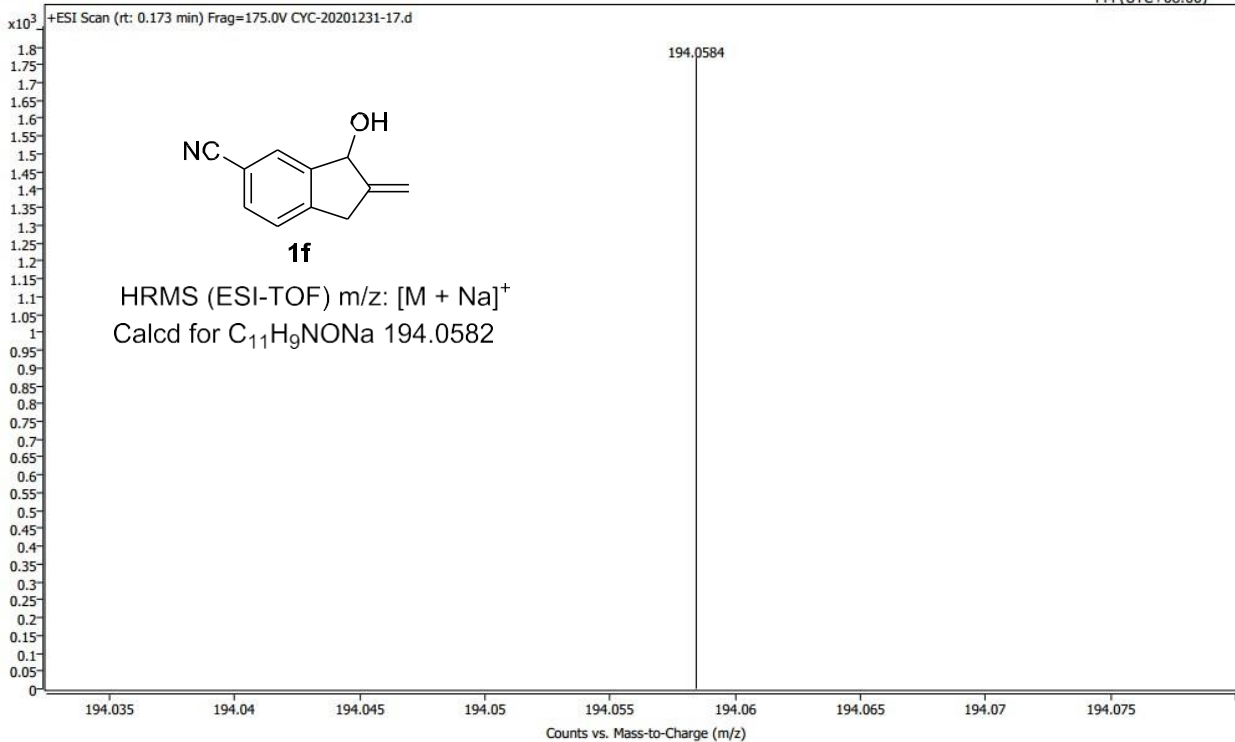

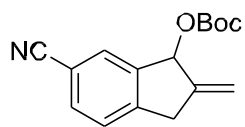

**1g**

$^1\text{H NMR}$  (600 MHz,  $\text{CDCl}_3$ )

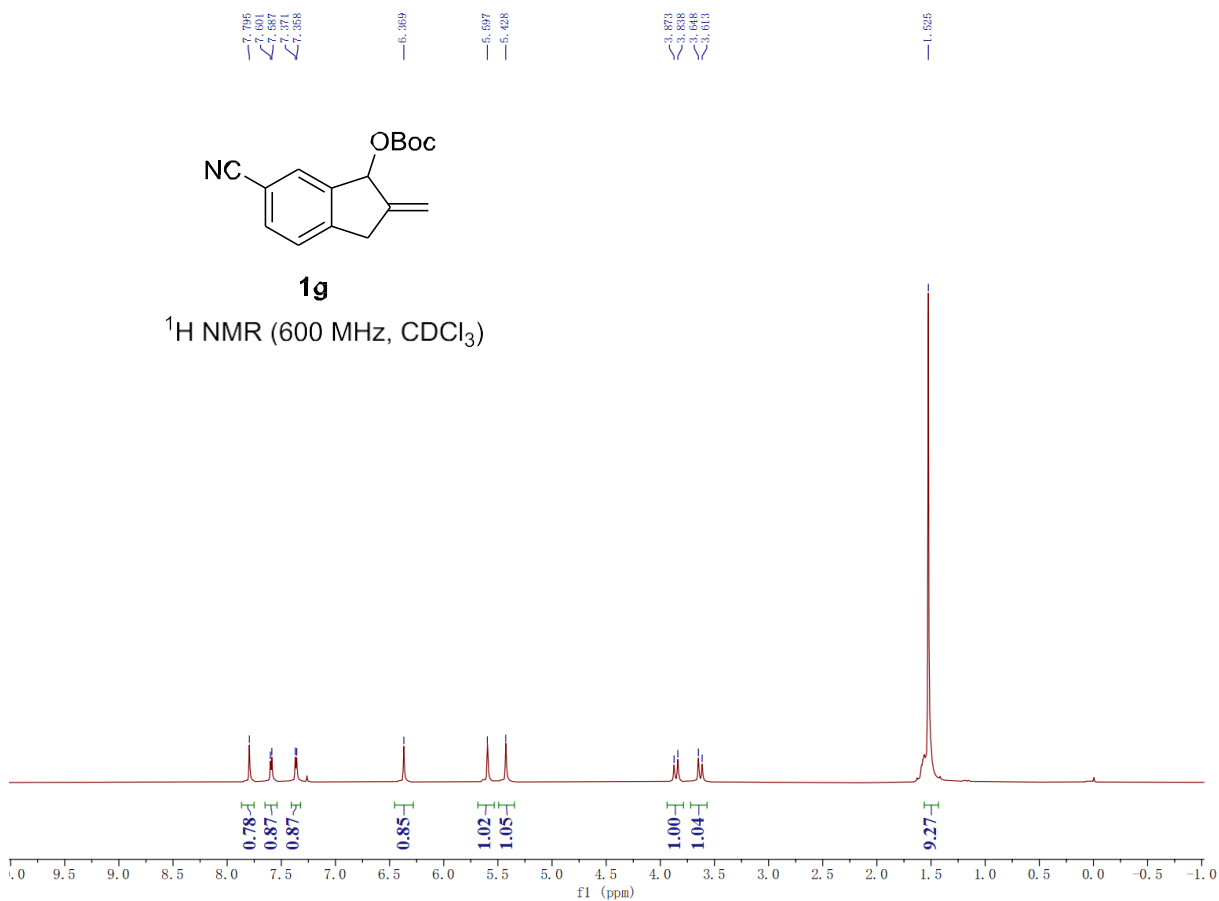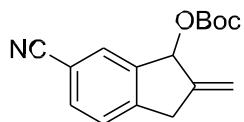

**1g**

$^{13}\text{C NMR}$  (150 MHz,  $\text{CDCl}_3$ )

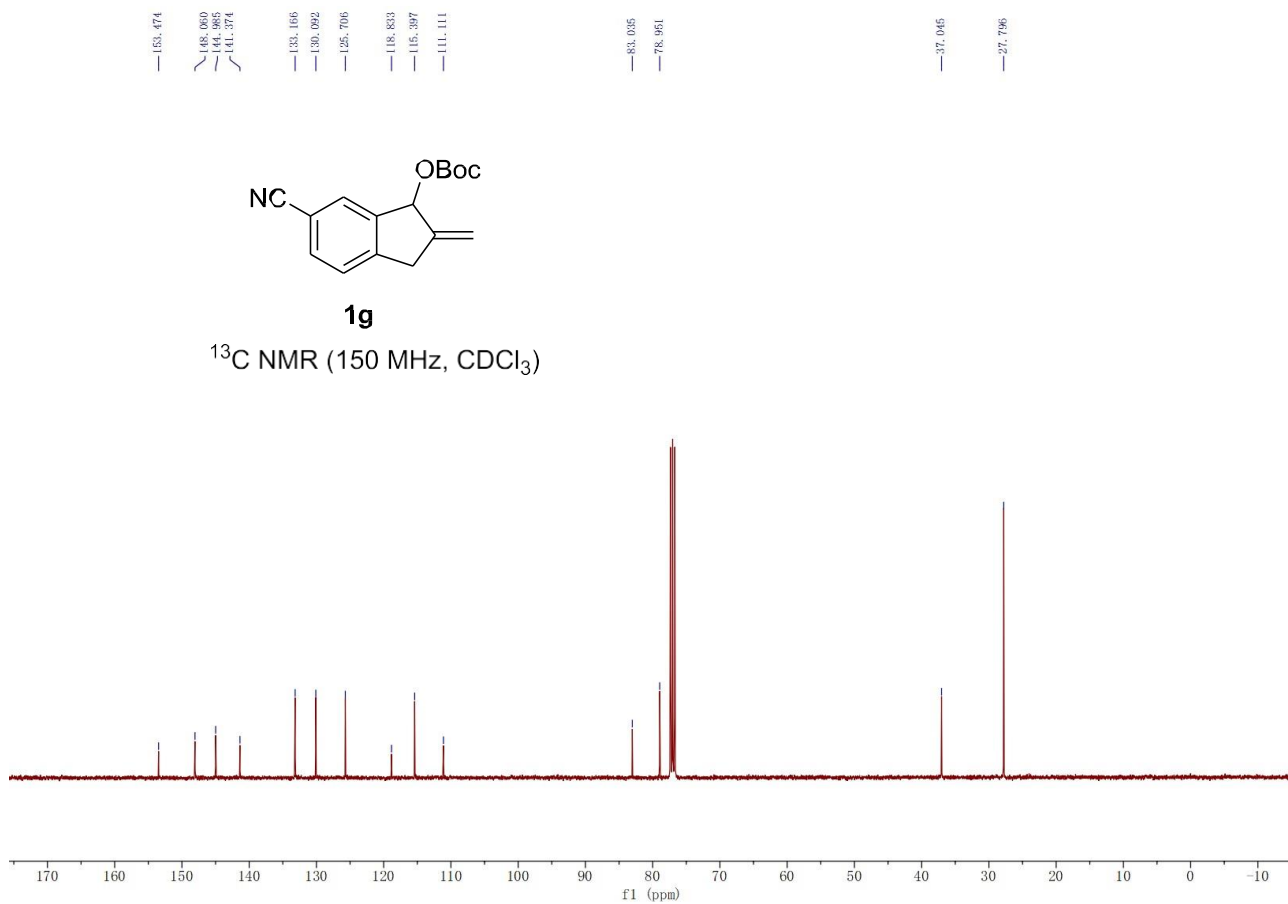

# Spectrum Plot Report

|                |                 |              |                |            |              |                   |                                   |
|----------------|-----------------|--------------|----------------|------------|--------------|-------------------|-----------------------------------|
| Name           | CYC-220425-27   | Rack Pos.    |                | Instrument | Instrument 1 | Operator          |                                   |
| Inj. Vol. (ul) | 8               | Plate Pos.   |                | IRM Status | Success      |                   |                                   |
| Data File      | CYC-220425-27.d | Method (Acq) | ZYJ-20201106.m | Comment    |              | Acq. Time (Local) | 4/29/2022 11:34:14 AM (UTC+08:00) |

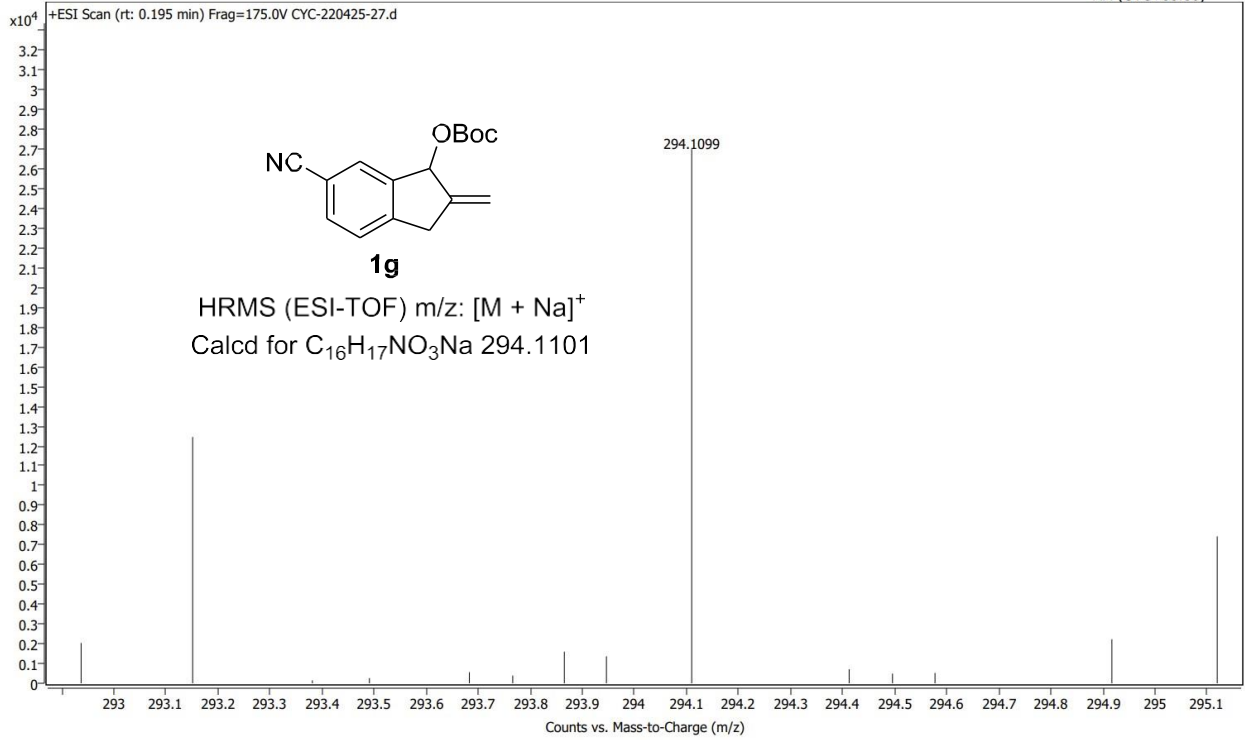



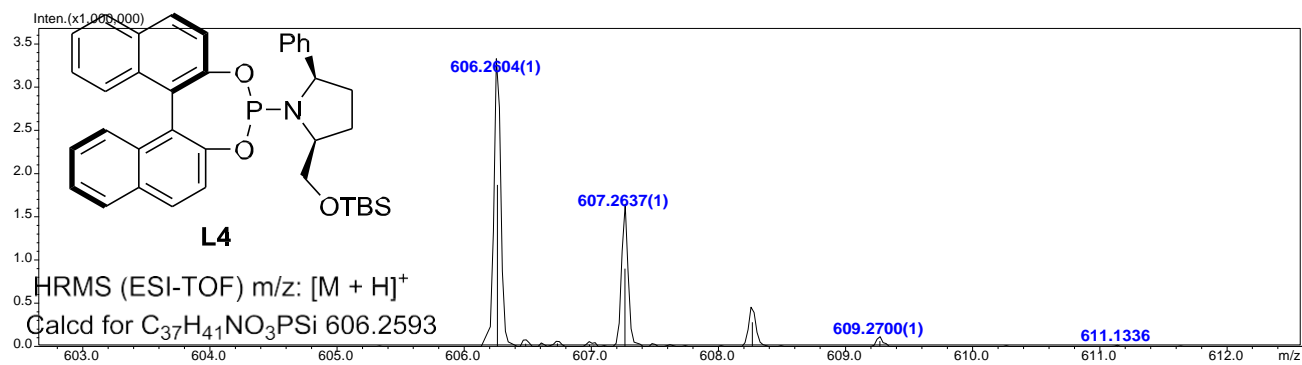

8.126  
8.120  
7.942  
7.884  
7.872  
7.870  
7.849  
7.844  
7.825  
7.805  
7.686  
7.676  
7.665  
7.442  
7.438  
7.435  
7.417  
7.405  
7.024  
7.004  
6.541  
4.715  
4.681  
3.908  
3.902  
3.885  
3.859  
3.854  
3.821  
3.825  
3.382

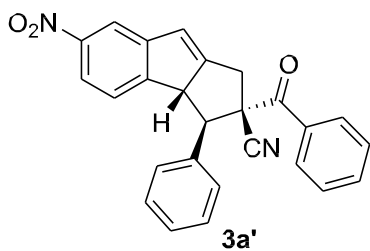

<sup>1</sup>H NMR (400 MHz, CDCl<sub>3</sub>)

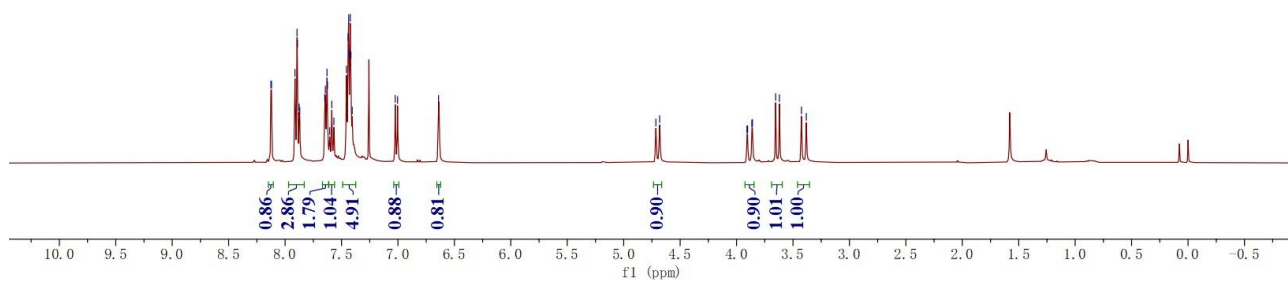

190.981  
154.445  
149.004  
148.537  
146.369  
136.397  
134.256  
133.555  
129.539  
129.297  
128.864  
128.880  
128.724  
123.772  
123.760  
120.142  
116.132  
62.903  
57.530  
52.234  
38.588

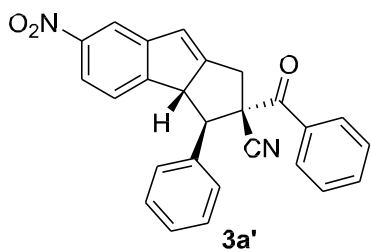

<sup>13</sup>C NMR (100 MHz, CDCl<sub>3</sub>)

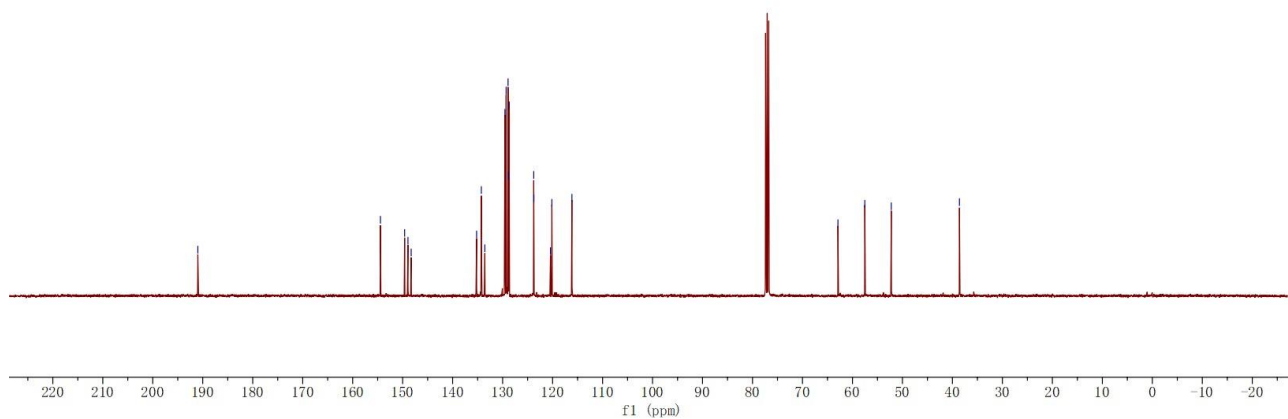



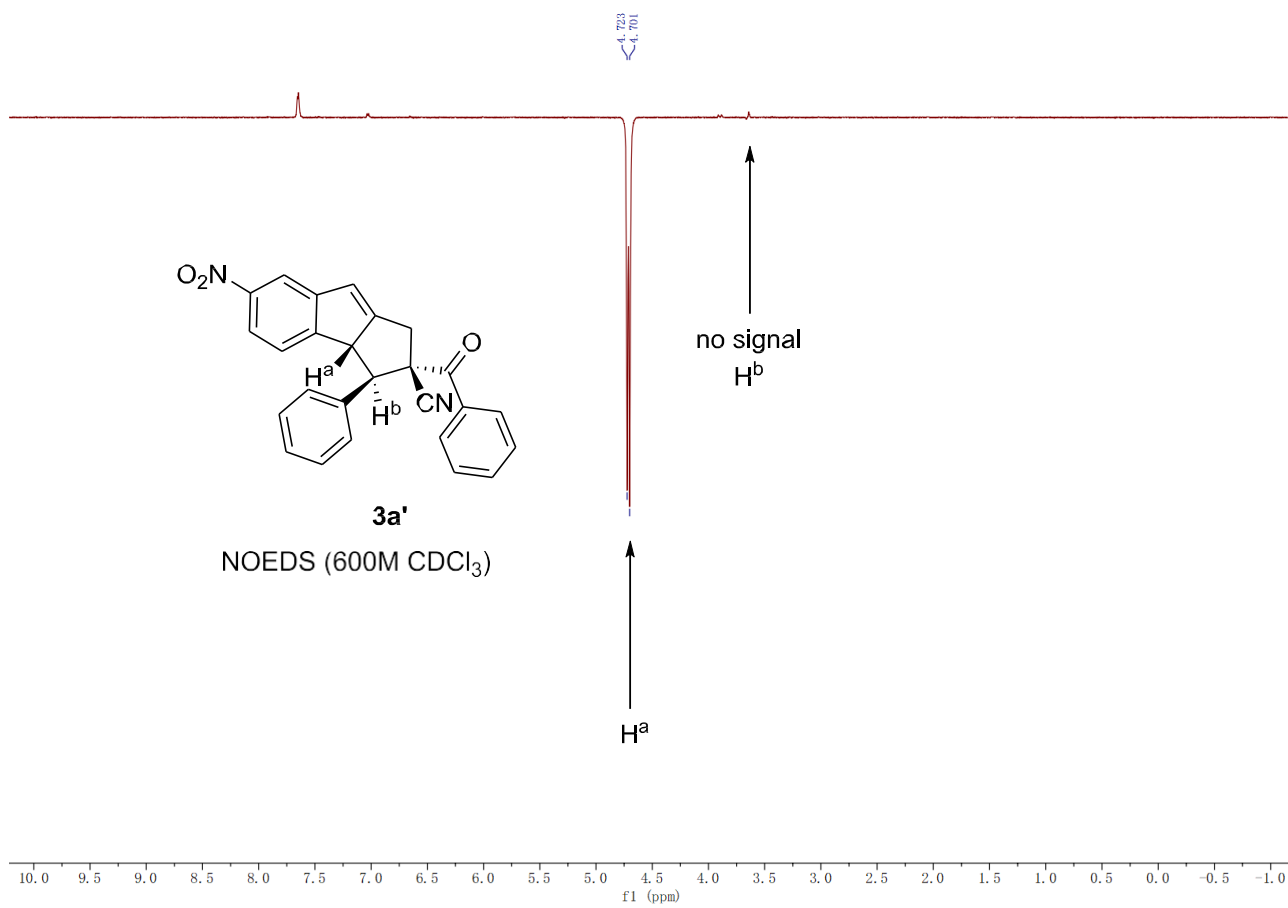

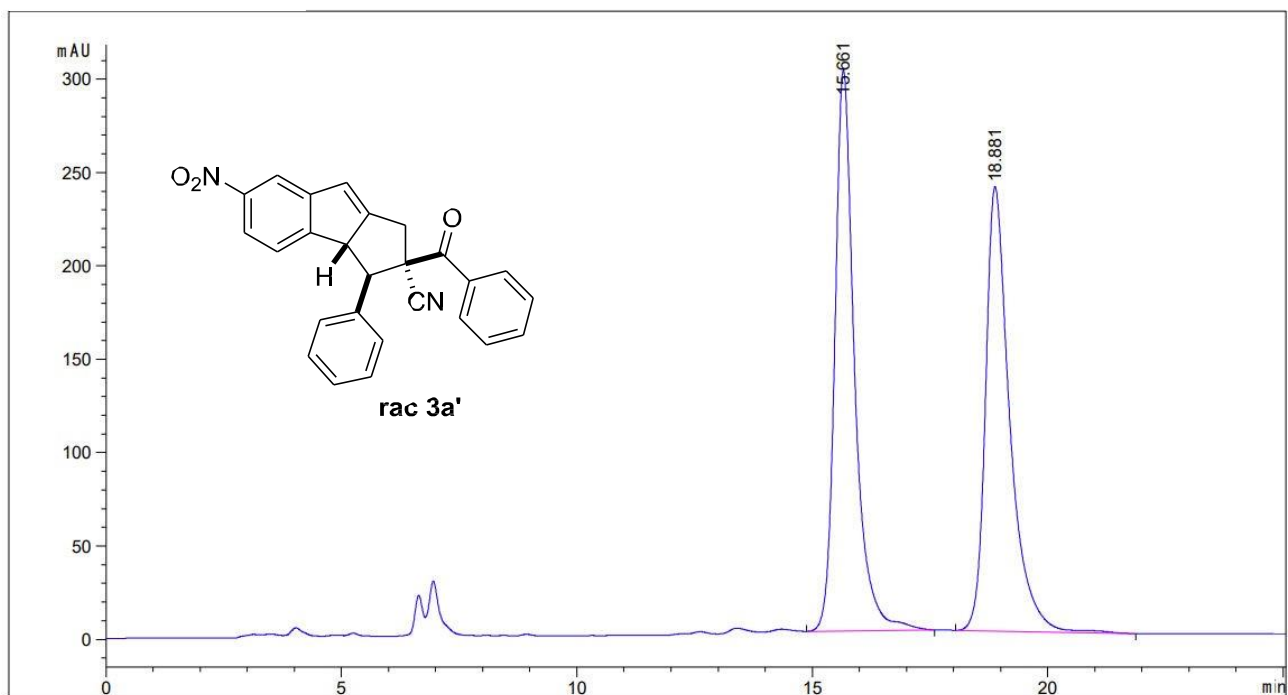

| # | [min]  | [min] | [mAU*s] | [mAU]      | %         |         |
|---|--------|-------|---------|------------|-----------|---------|
| 1 | 15.661 | BB    | 0.4346  | 8752.58008 | 300.37457 | 50.5949 |
| 2 | 18.881 | BB    | 0.5311  | 8546.74219 | 238.00890 | 49.4051 |

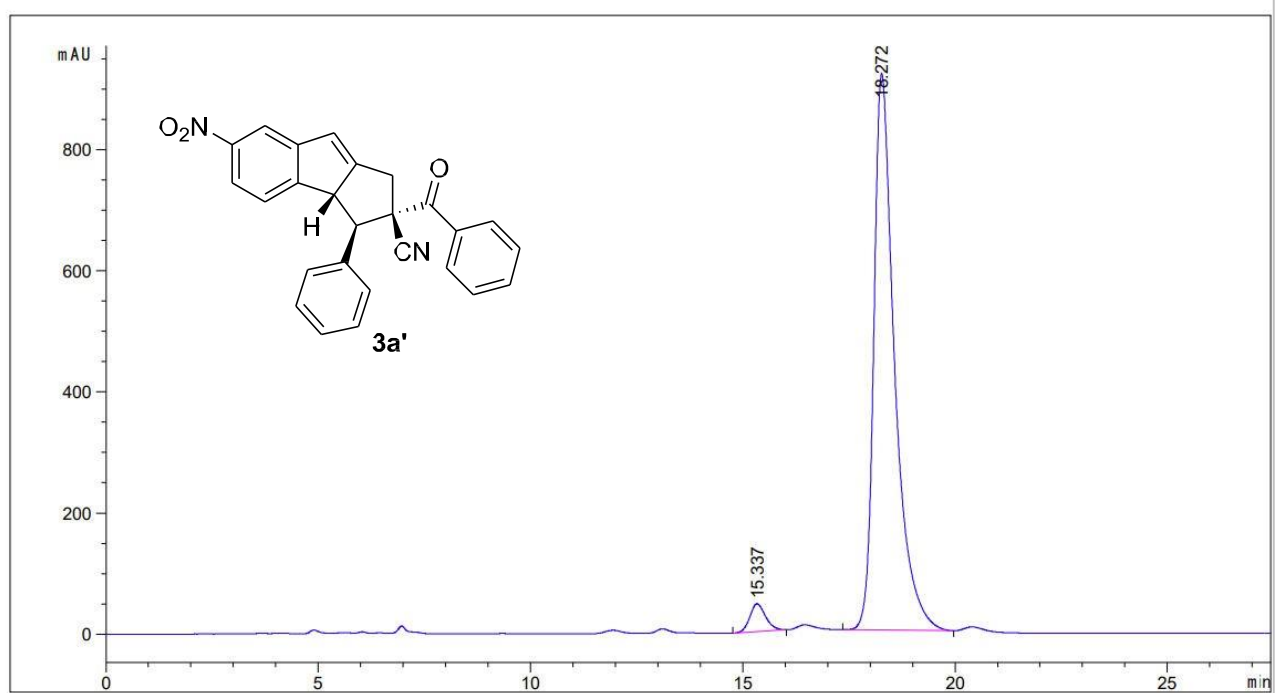

| # | [min]  | [min] | [mAU*s] | [mAU]      | %         |         |
|---|--------|-------|---------|------------|-----------|---------|
| 1 | 15.337 | BB    | 0.3931  | 1189.36987 | 46.04202  | 3.6688  |
| 2 | 18.272 | BB    | 0.5013  | 3.12292e4  | 918.93475 | 96.3312 |

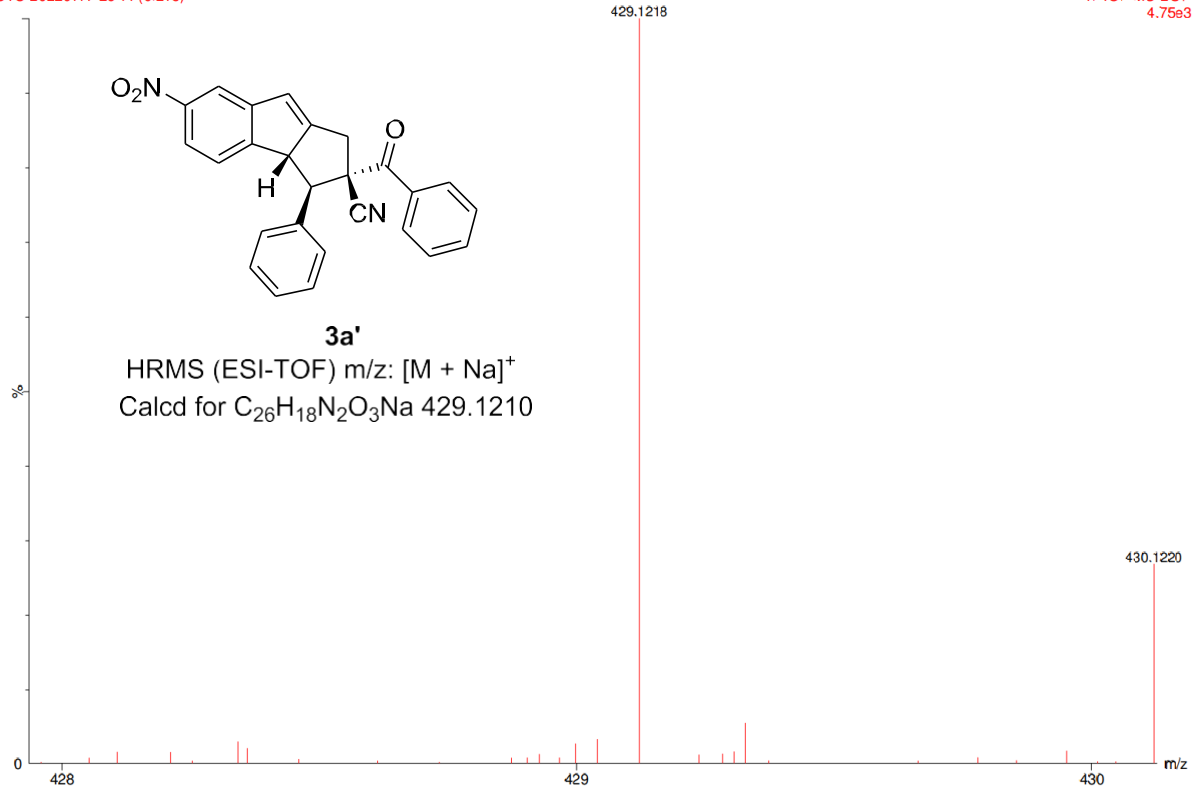

8.374  
8.259  
8.159  
8.157  
8.144  
8.139  
8.135  
8.085  
8.084  
8.019  
7.679  
7.662  
7.553  
7.548  
7.545  
7.514  
7.509  
7.511  
7.527  
7.529  
7.415  
7.411  
7.405  
7.393  
7.388  
7.317  
7.310  
7.292  
7.287  
7.283  
6.865  
6.862  
6.865  
6.865

3.815  
3.798  
3.719  
3.676  
3.671  
3.597  
3.539  
3.499  
3.479

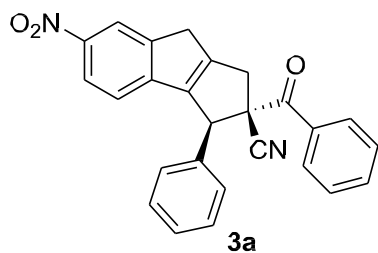

$^1\text{H}$  NMR (400 MHz,  $\text{CDCl}_3$ )

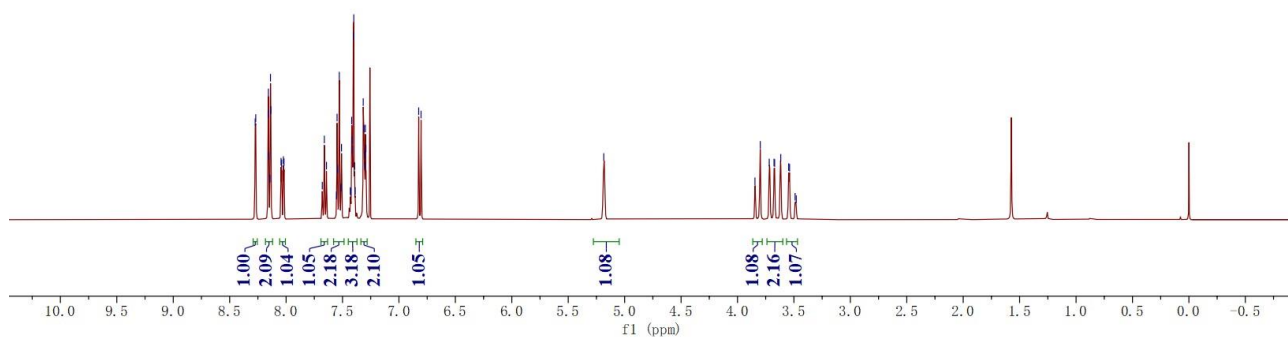

190.371  
153.316  
148.350  
147.828  
145.420  
145.400  
135.950  
134.753  
132.753  
130.041  
129.082  
128.982  
128.902  
123.181  
119.064  
118.956  
119.259

62.411  
53.827  
41.841  
35.746

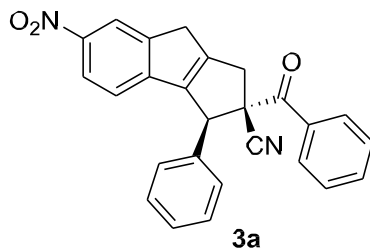

$^{13}\text{C}$  NMR (100 MHz,  $\text{CDCl}_3$ )

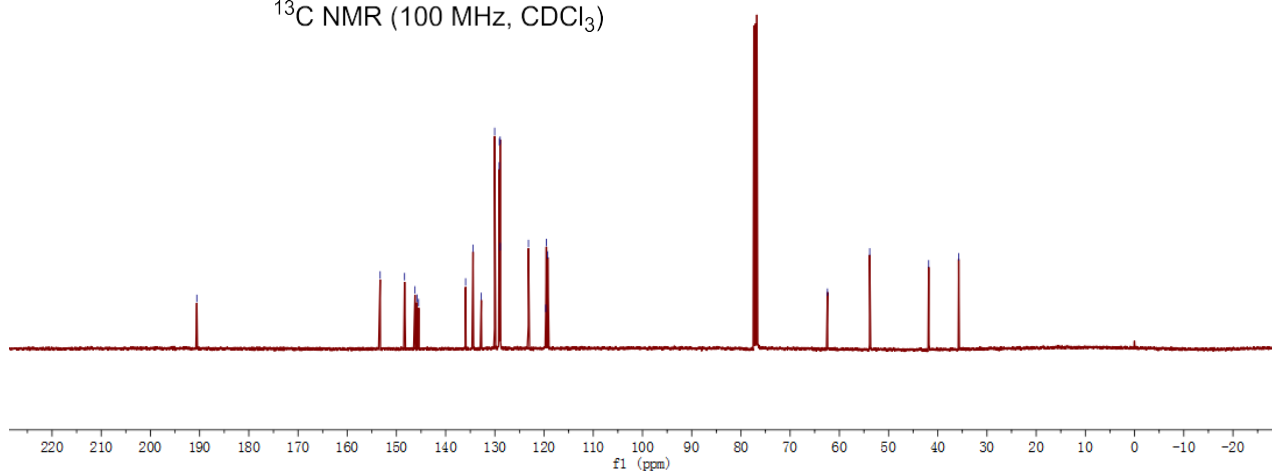

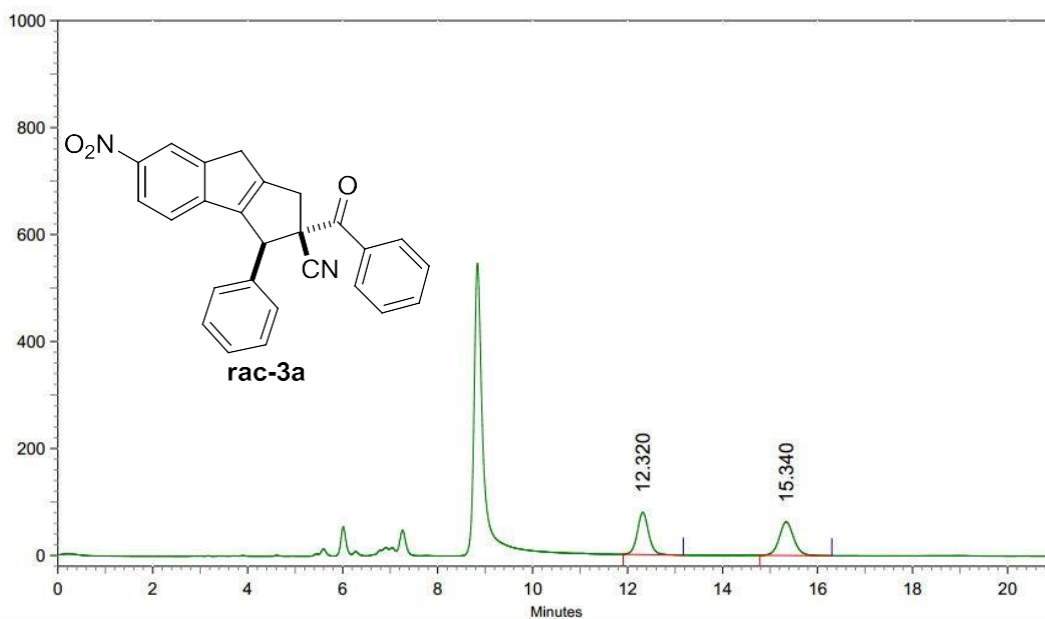

**AREA PERCENT REPORT**

| Peak No. | Ret Time | Width | Height  | Area     | Area [%] |
|----------|----------|-------|---------|----------|----------|
| 1        | 12.320   | 1.267 | 1321520 | 21879568 | 49.5716  |
| 2        | 15.340   | 1.513 | 1055084 | 22257713 | 50.4284  |

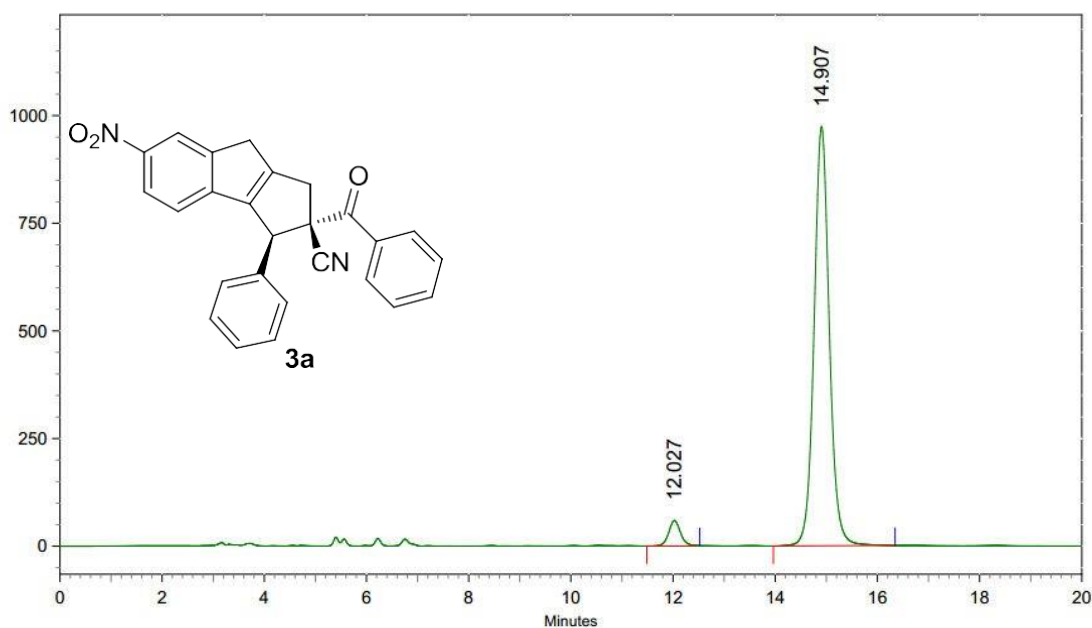

**AREA PERCENT REPORT**

| Peak No. | Ret Time | Width | Height   | Area      | Area [%] |
|----------|----------|-------|----------|-----------|----------|
| 1        | 12.027   | 1.033 | 998434   | 16335364  | 4.6023   |
| 2        | 14.907   | 2.383 | 16334320 | 338606828 | 95.3977  |

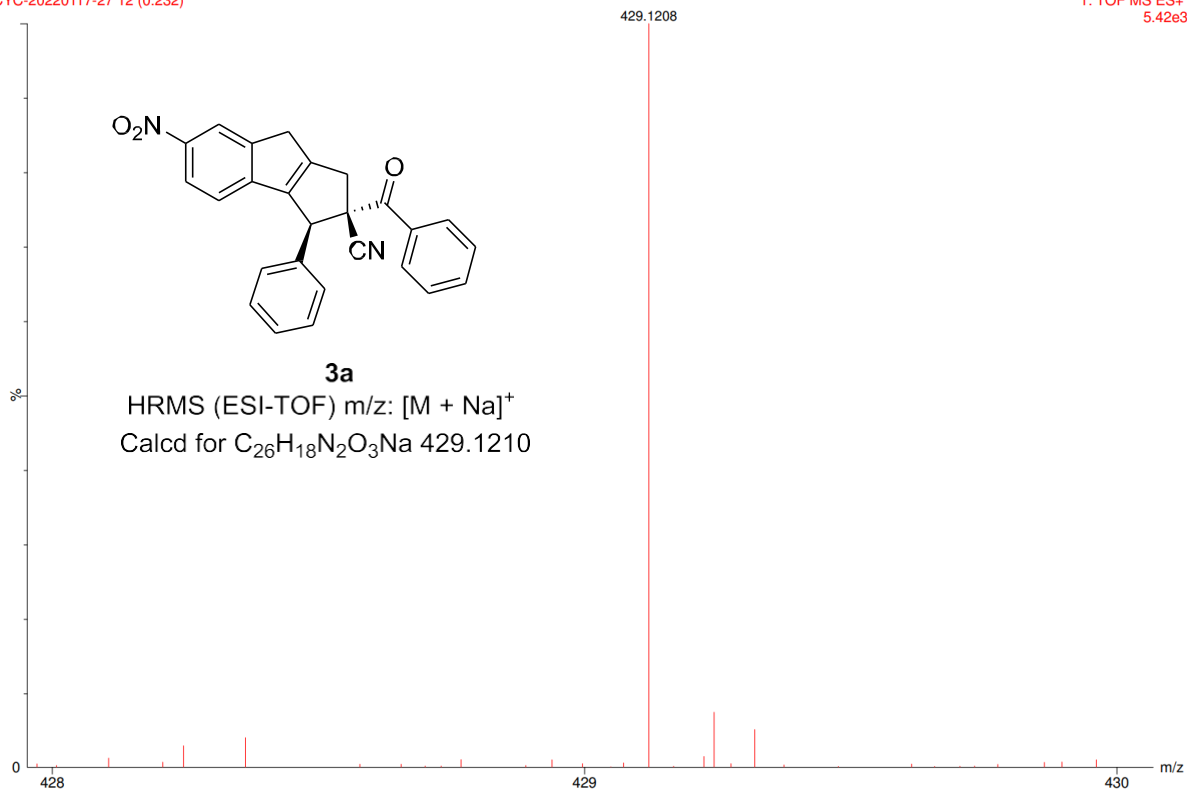



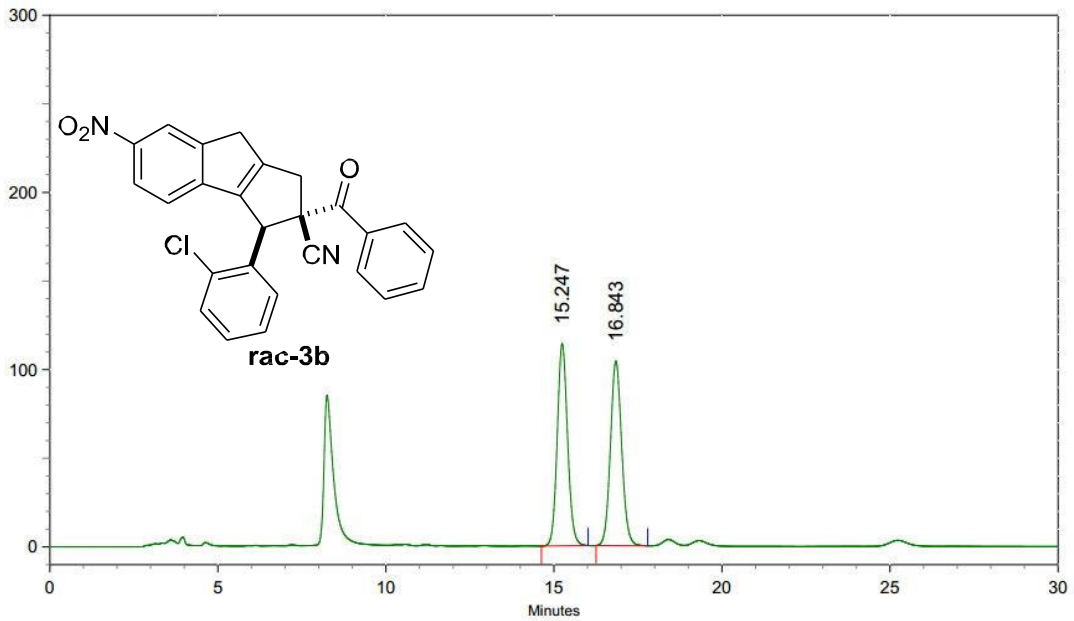

**AREA PERCENT REPORT**

| Peak No. | Ret Time | Width | Height  | Area     | Area [%] |
|----------|----------|-------|---------|----------|----------|
| 1        | 15.247   | 1.390 | 1914824 | 40880904 | 50.0501  |
| 2        | 16.843   | 1.537 | 1747360 | 40799080 | 49.9499  |

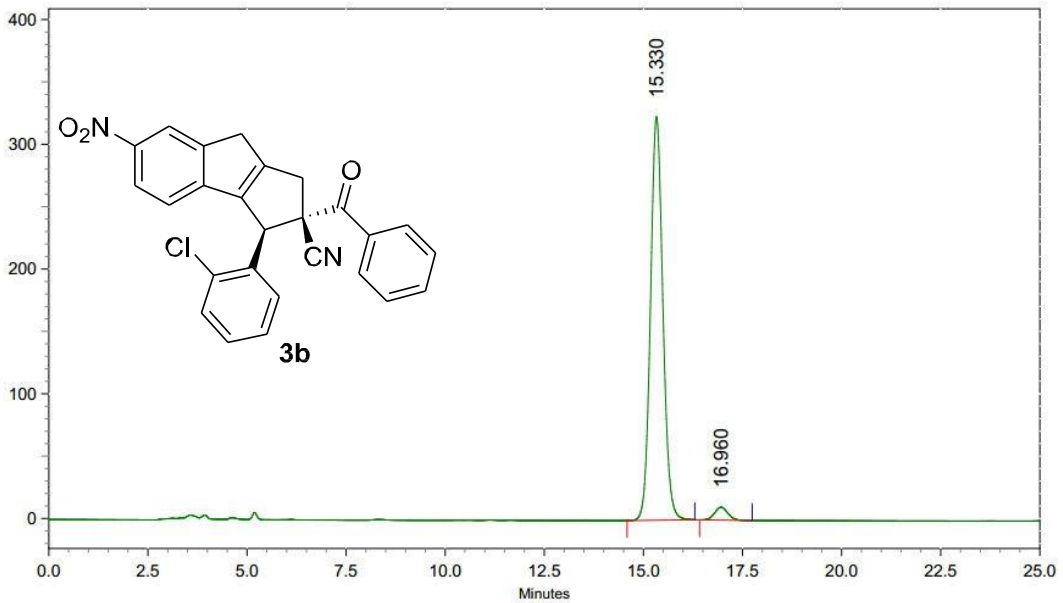

**AREA PERCENT REPORT**

| Peak No. | Ret Time | Width | Height  | Area      | Area [%] |
|----------|----------|-------|---------|-----------|----------|
| 1        | 15.330   | 1.707 | 5427810 | 118074680 | 96.7091  |
| 2        | 16.960   | 1.330 | 173703  | 4017953   | 3.2909   |



# Spectrum Plot Report

|                |                  |              |            |              |                                   |
|----------------|------------------|--------------|------------|--------------|-----------------------------------|
| Name           | CYC-20191103-7   | Rack Pos.    | Instrument | Instrument 1 | Operator                          |
| Inj. Vol. (ul) | 10               | Plate Pos.   | IRM Status | Success      |                                   |
| Data File      | CYC-20191103-7.d | Method (Acq) | Comment    |              | Acq. Time (Local)                 |
|                |                  |              | TOF.m      |              | 11/8/2019 10:38:36 AM (UTC+08:00) |

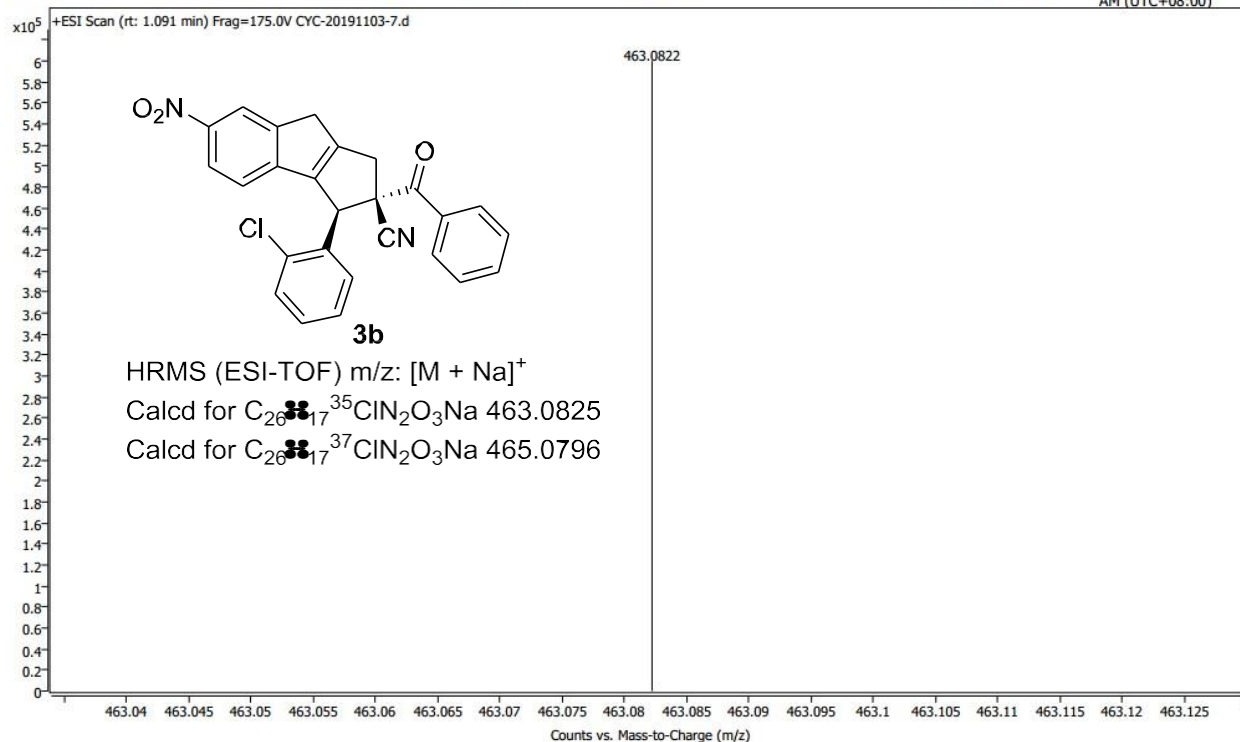

# Spectrum Plot Report

|                |                  |              |            |              |                                   |
|----------------|------------------|--------------|------------|--------------|-----------------------------------|
| Name           | CYC-20191103-7   | Rack Pos.    | Instrument | Instrument 1 | Operator                          |
| Inj. Vol. (ul) | 10               | Plate Pos.   | IRM Status | Success      |                                   |
| Data File      | CYC-20191103-7.d | Method (Acq) | Comment    |              | Acq. Time (Local)                 |
|                |                  |              | TOF.m      |              | 11/8/2019 10:38:36 AM (UTC+08:00) |

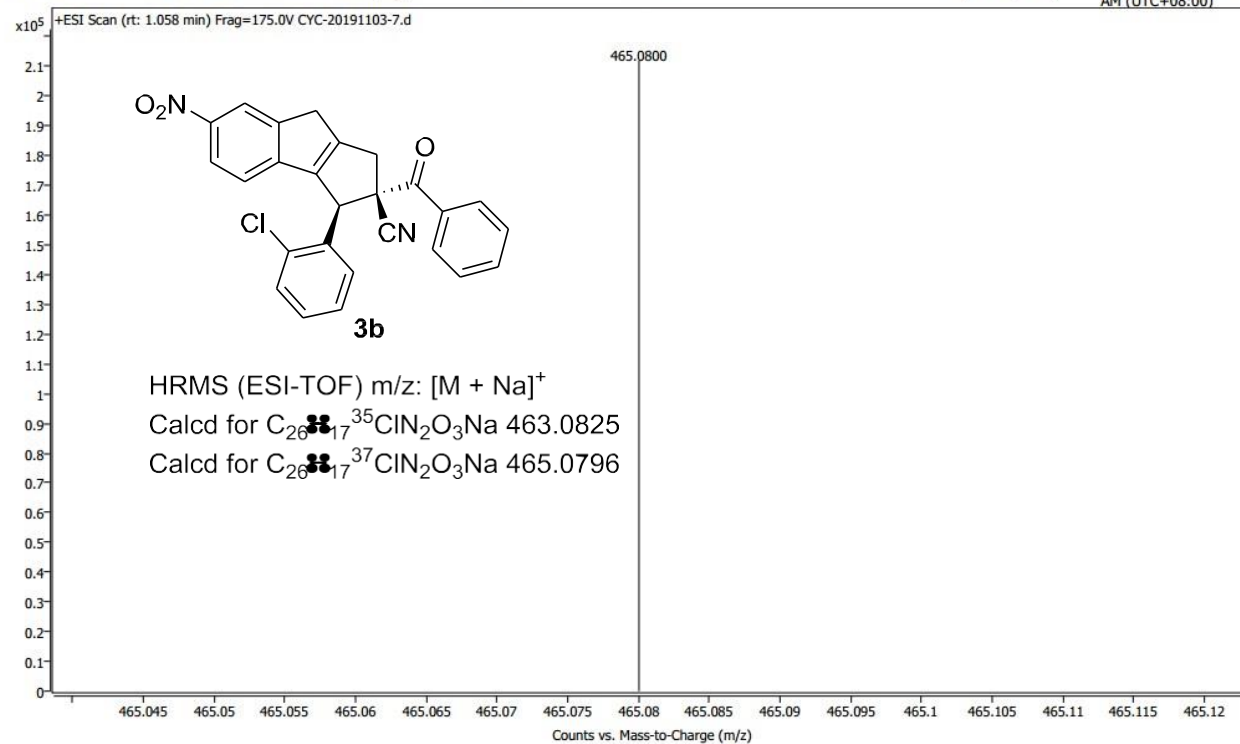

8.7784  
8.7765  
8.175  
8.168  
8.164  
8.149  
8.146  
8.085  
8.084  
8.068  
7.698  
7.697  
7.693  
7.573  
7.568  
7.564  
7.548  
7.534  
7.529  
7.525  
7.523  
7.509  
7.385  
7.375  
7.369  
7.365  
7.359  
7.350  
7.309  
7.305  
7.299  
7.298  
7.293  
7.288  
7.283  
7.199  
7.198  
7.186  
6.889  
6.887  
6.882

3.753  
3.693  
3.633  
3.573  
3.513

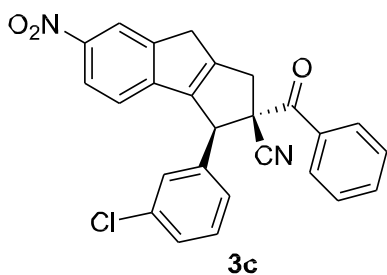

<sup>1</sup>H NMR (400 MHz, CDCl<sub>3</sub>)

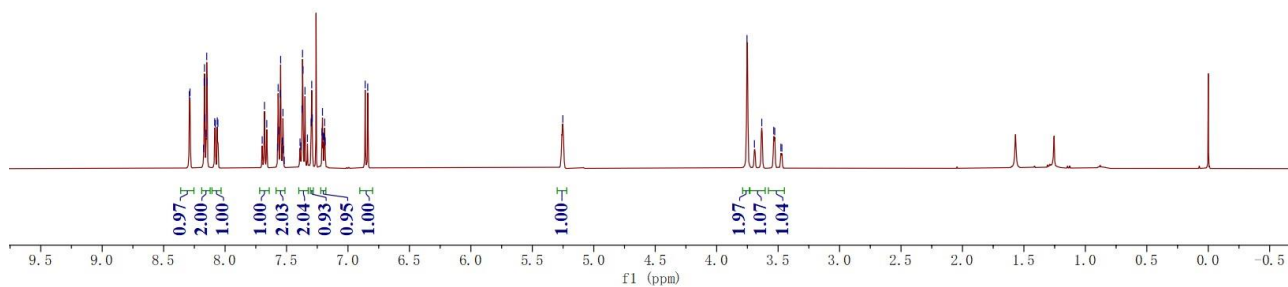

190.185  
152.411  
148.311  
146.727  
146.632  
145.467  
138.187  
134.909  
134.599  
132.650  
130.358  
129.072  
129.226  
129.132  
128.021  
127.309  
127.309  
119.639  
119.354  
119.298

62.407  
52.821  
42.004  
35.793

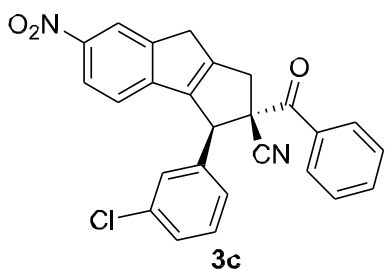

<sup>13</sup>C NMR (100 MHz, CDCl<sub>3</sub>)

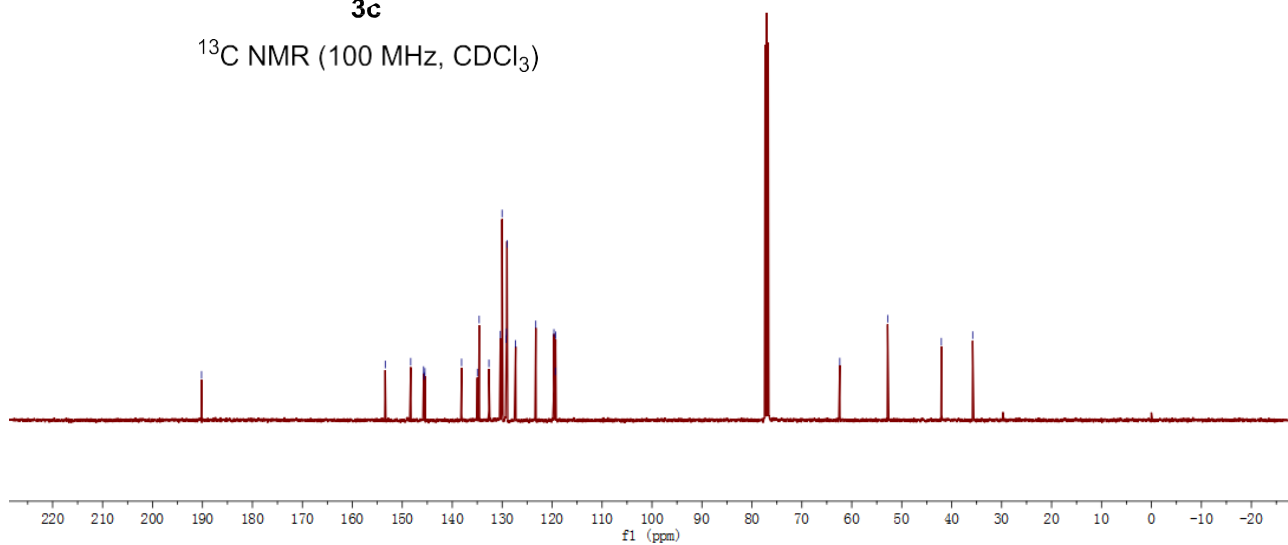

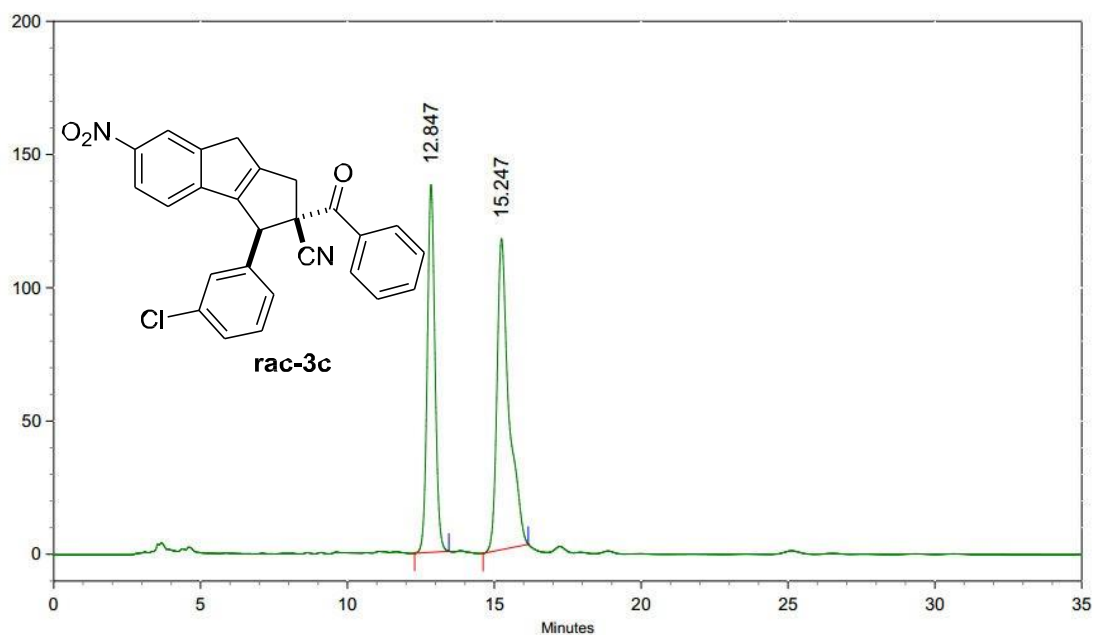

### AREA PERCENT REPORT

| Peak No. | Ret Time | Width | Height  | Area     | Area [%] |
|----------|----------|-------|---------|----------|----------|
| 1        | 12.847   | 1.163 | 2314980 | 42109270 | 43.1324  |
| 2        | 15.247   | 1.537 | 1957978 | 55518592 | 56.8676  |

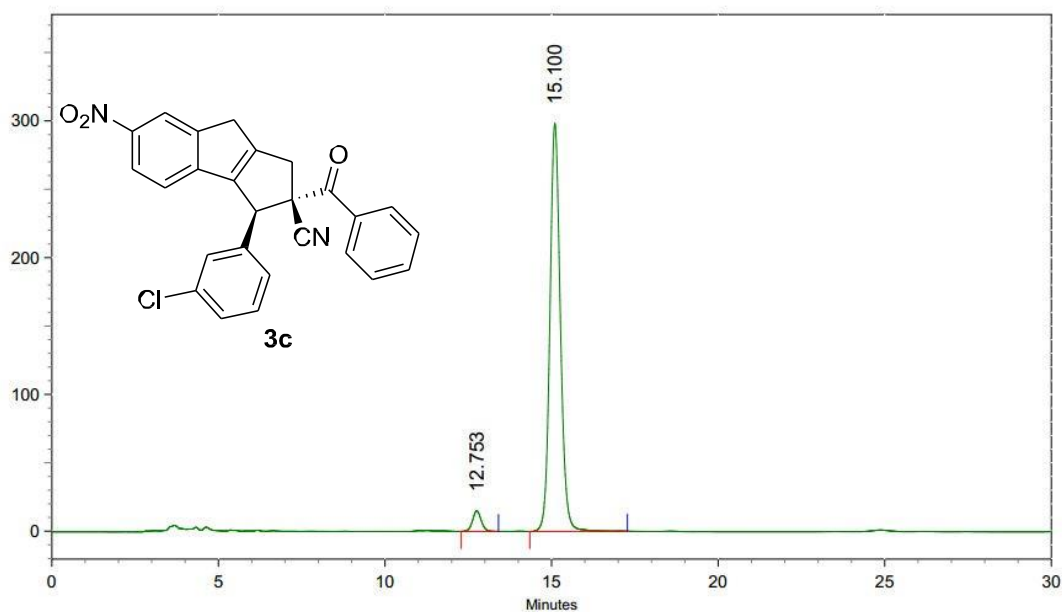

### AREA PERCENT REPORT

| Peak No. | Ret Time | Width | Height  | Area      | Area [%] |
|----------|----------|-------|---------|-----------|----------|
| 1        | 12.753   | 1.117 | 253142  | 4582450   | 4.0329   |
| 2        | 15.100   | 2.930 | 5005440 | 109043702 | 95.9671  |

# Spectrum Plot Report

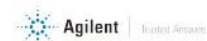

|                |                   |              |       |            |              |                   |                                   |
|----------------|-------------------|--------------|-------|------------|--------------|-------------------|-----------------------------------|
| Name           | CYC-20191018-66   | Rack Pos.    |       | Instrument | Instrument 1 | Operator          |                                   |
| Inj. Vol. (ul) | 10                | Plate Pos.   |       | IRM Status | Success      |                   |                                   |
| Data File      | CYC-20191018-66.d | Method (Acq) | TOF.m | Comment    |              | Acq. Time (Local) | 10/29/2019 4:13:27 PM (UTC+08:00) |

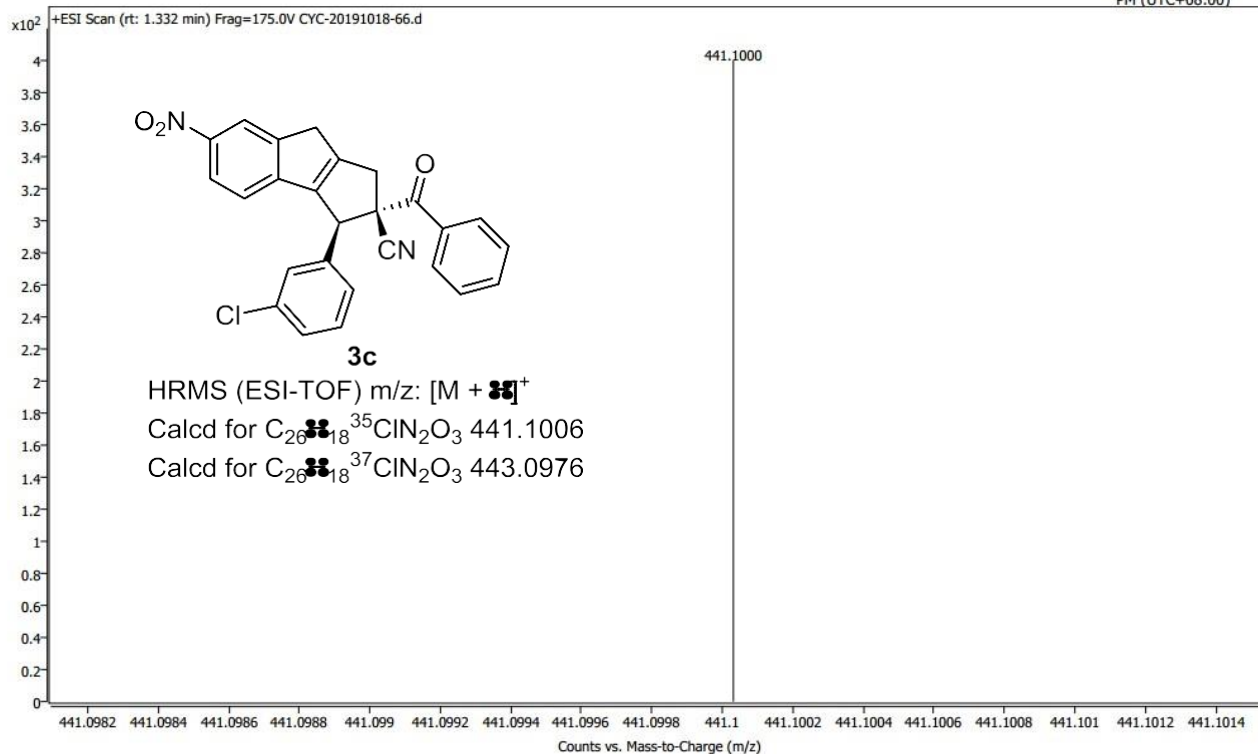

# Spectrum Plot Report

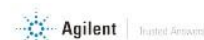

|                |                   |              |       |            |              |                   |                                   |
|----------------|-------------------|--------------|-------|------------|--------------|-------------------|-----------------------------------|
| Name           | CYC-20191018-66   | Rack Pos.    |       | Instrument | Instrument 1 | Operator          |                                   |
| Inj. Vol. (ul) | 10                | Plate Pos.   |       | IRM Status | Success      |                   |                                   |
| Data File      | CYC-20191018-66.d | Method (Acq) | TOF.m | Comment    |              | Acq. Time (Local) | 10/29/2019 4:13:27 PM (UTC+08:00) |

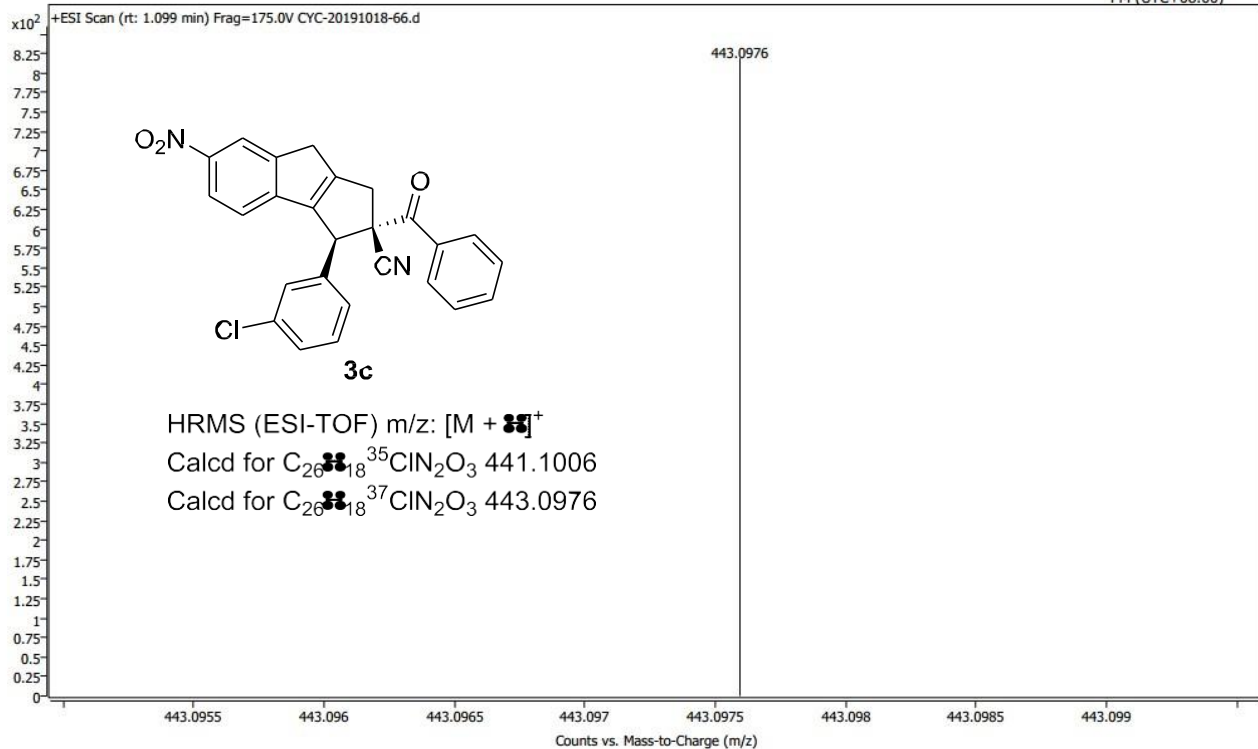

8.287  
8.282  
8.155  
8.152  
8.134  
8.131  
8.078  
8.073  
8.057  
8.052  
7.974  
7.991  
7.876  
7.657  
7.644  
7.548  
7.543  
7.541  
7.527  
7.522  
7.203  
7.182  
6.834  
6.813  
5.250  
5.247  
3.741  
3.692  
3.623  
3.535  
3.526  
3.477  
3.468

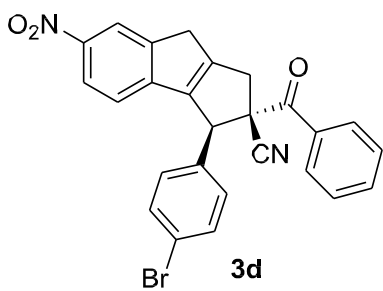

$^1\text{H}$  NMR (400 MHz,  $\text{CDCl}_3$ )

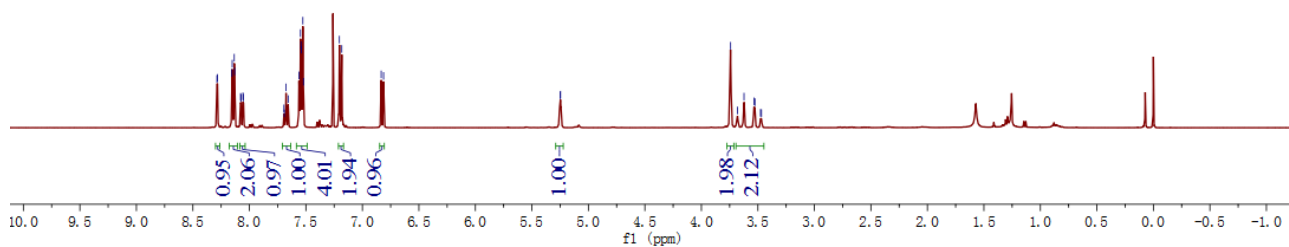

190.304  
153.277  
148.303  
146.813  
146.512  
146.505  
136.024  
134.583  
132.769  
132.269  
130.811  
129.978  
128.012  
127.644  
123.622  
119.622  
116.488  
116.291

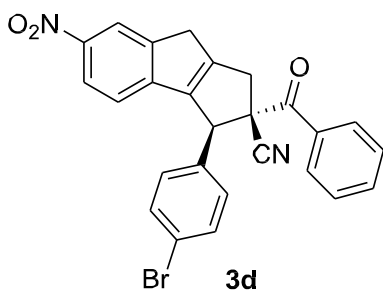

$^{13}\text{C}$  NMR (100 MHz,  $\text{CDCl}_3$ )

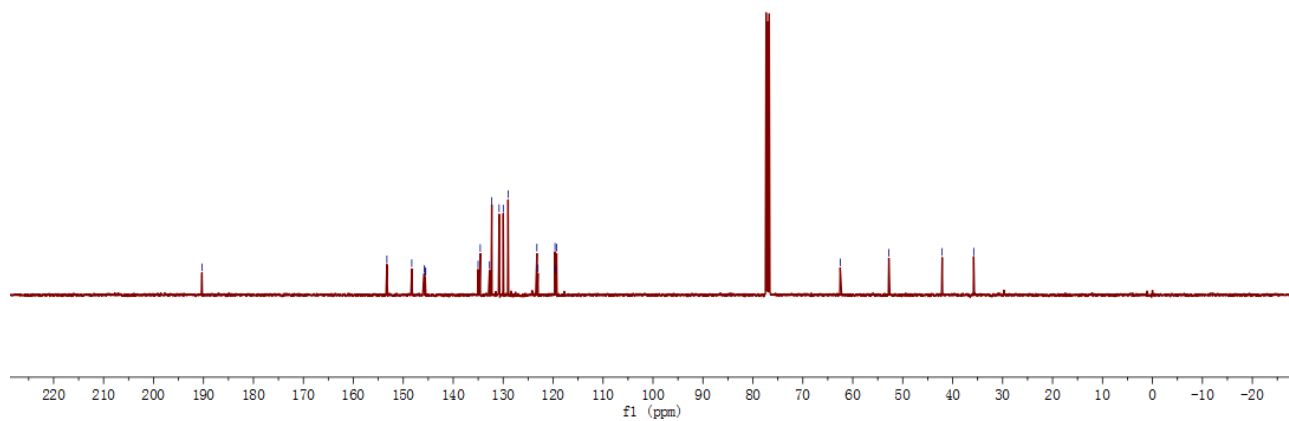

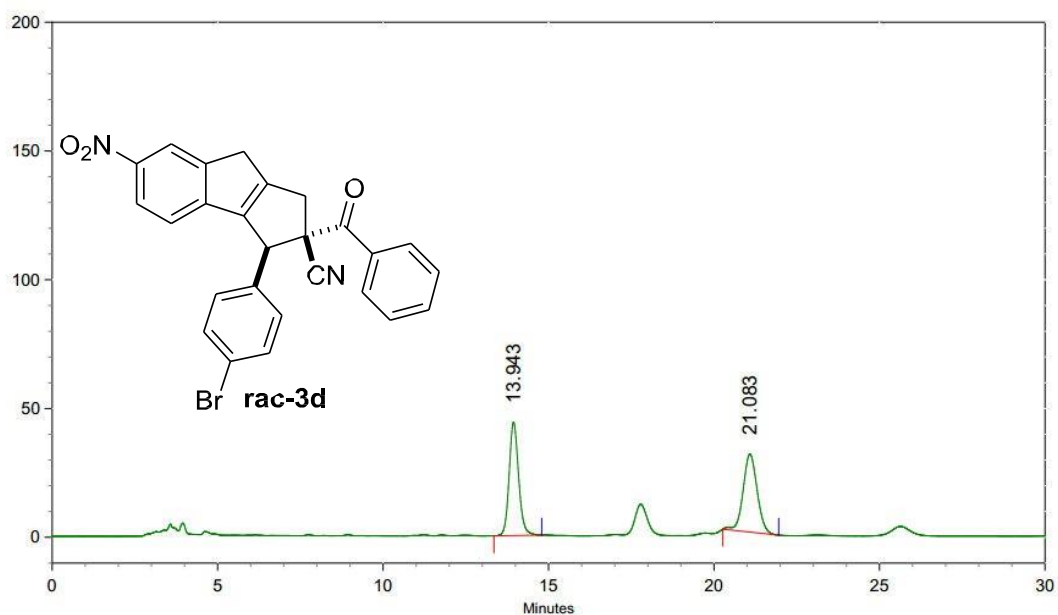

**AREA PERCENT REPORT**

| Peak No. | Ret Time | Width | Height | Area     | Area [%] |
|----------|----------|-------|--------|----------|----------|
| 1        | 13.943   | 1.443 | 738074 | 14700066 | 49.4505  |
| 2        | 21.083   | 1.693 | 508083 | 15026763 | 50.5495  |

44

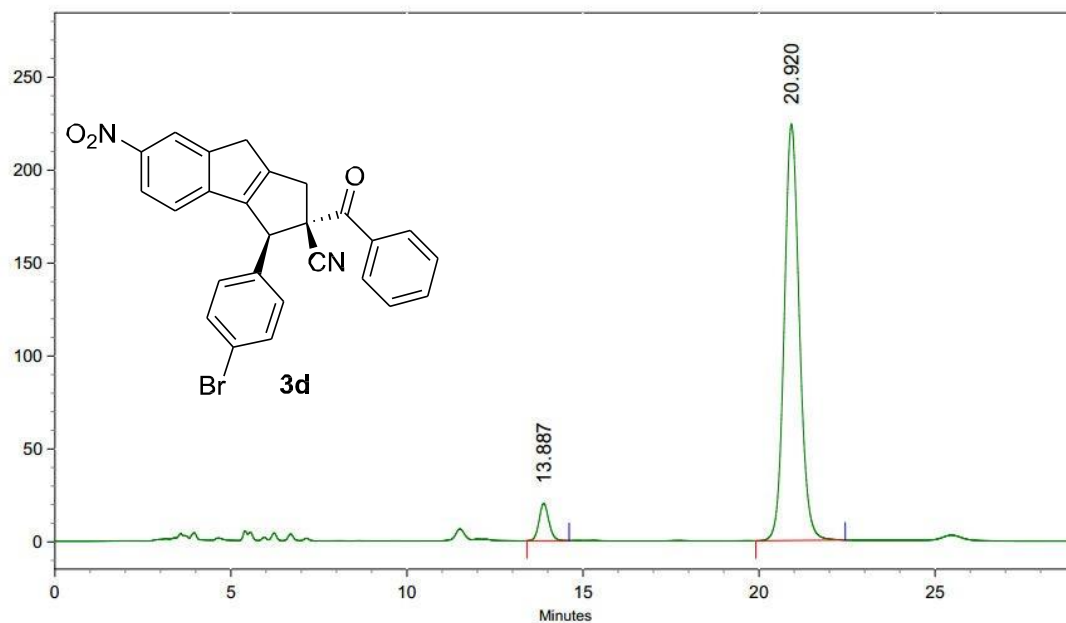

**AREA PERCENT REPORT**

| Peak No. | Ret Time | Width | Height  | Area      | Area [%] |
|----------|----------|-------|---------|-----------|----------|
| 1        | 13.887   | 1.200 | 336924  | 6551077   | 5.5246   |
| 2        | 20.920   | 2.540 | 3758984 | 112030071 | 94.4754  |

# Spectrum Plot Report

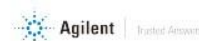

|                |                   |              |            |              |                                                     |
|----------------|-------------------|--------------|------------|--------------|-----------------------------------------------------|
| Name           | CYC-20191018-62   | Rack Pos.    | Instrument | Instrument 1 | Operator                                            |
| Inj. Vol. (ul) | 10                | Plate Pos.   | IRM Status | Success      |                                                     |
| Data File      | CYC-20191018-62.d | Method (Acq) | TOF.m      | Comment      | Acq. Time (Local) 10/29/2019 4:01:24 PM (UTC+08:00) |

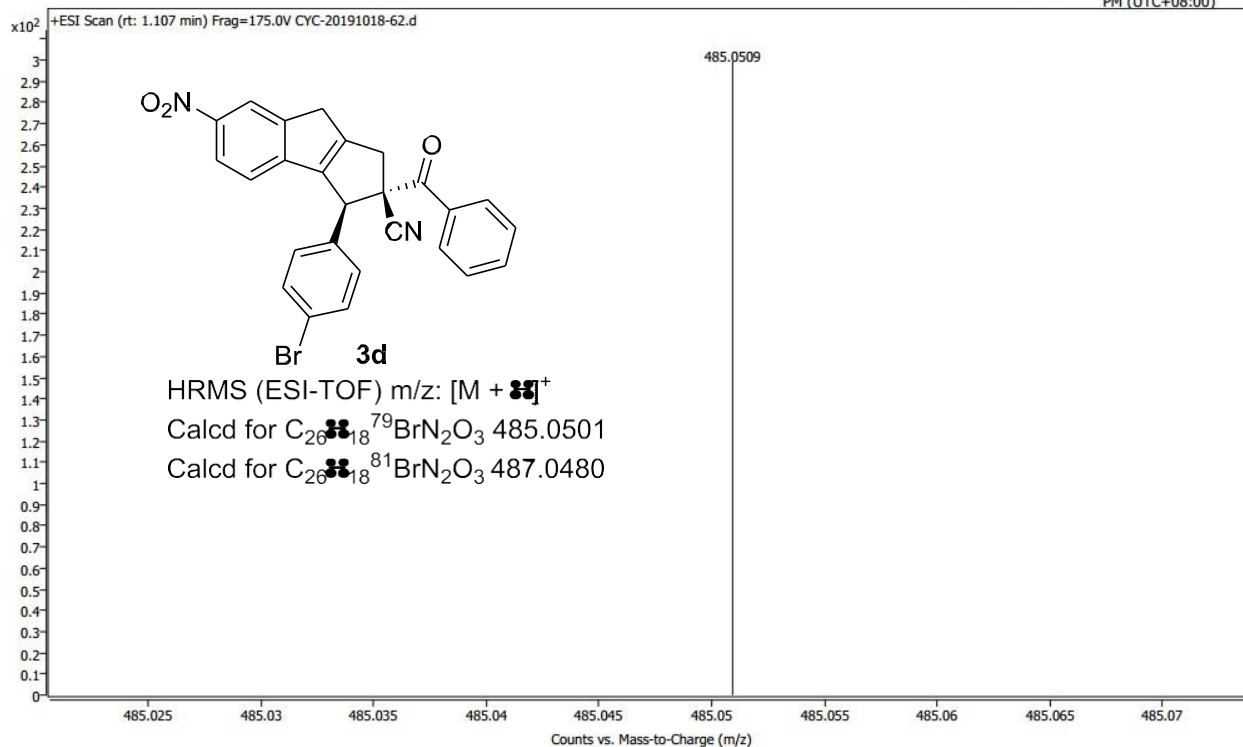

# Spectrum Plot Report

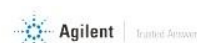

|                |                   |              |            |              |                                                     |
|----------------|-------------------|--------------|------------|--------------|-----------------------------------------------------|
| Name           | CYC-20191018-62   | Rack Pos.    | Instrument | Instrument 1 | Operator                                            |
| Inj. Vol. (ul) | 10                | Plate Pos.   | IRM Status | Success      |                                                     |
| Data File      | CYC-20191018-62.d | Method (Acq) | TOF.m      | Comment      | Acq. Time (Local) 10/29/2019 4:01:24 PM (UTC+08:00) |

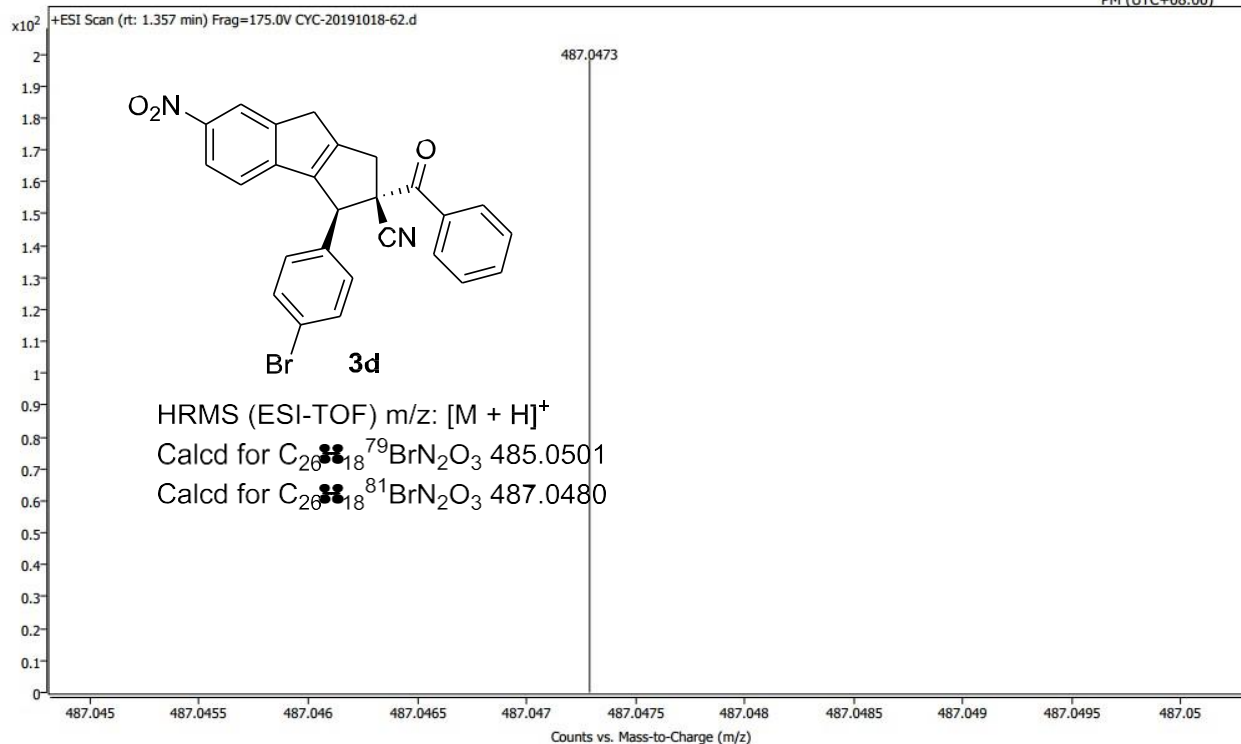

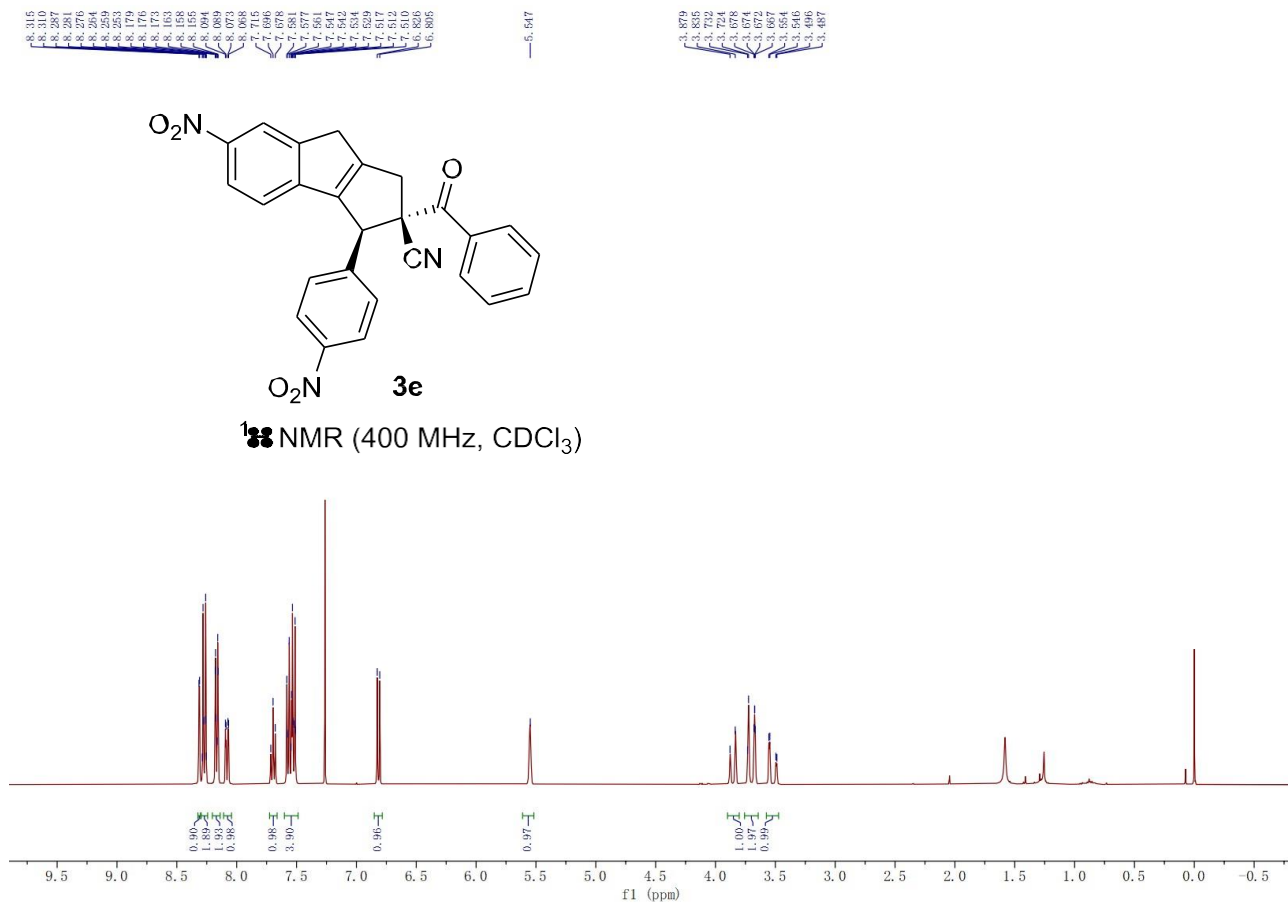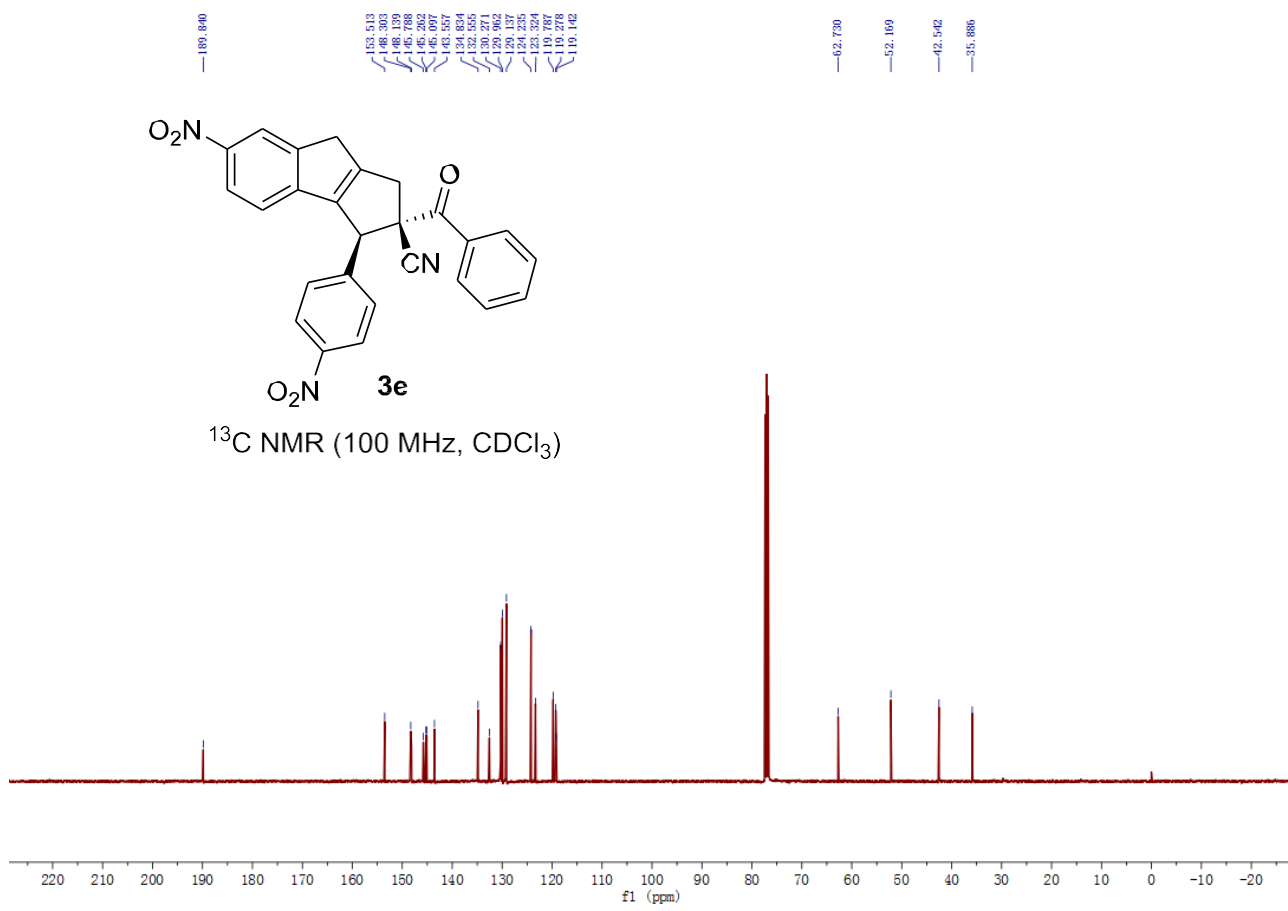



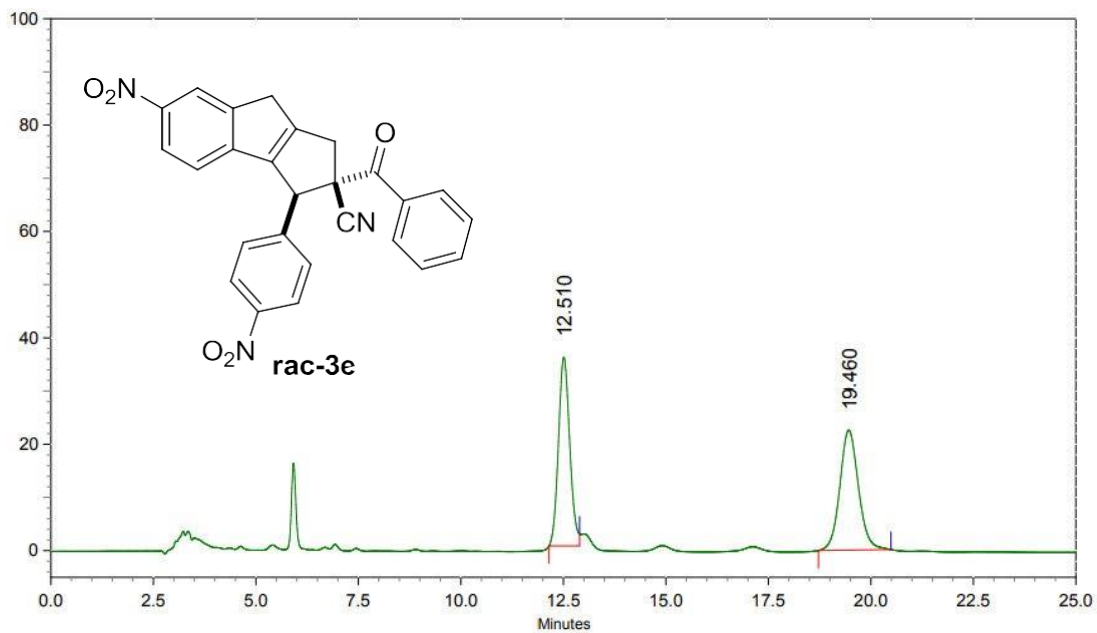

**AREA PERCENT REPORT**

| Peak No. | Ret Time | Width | Height | Area     | Area [%] |
|----------|----------|-------|--------|----------|----------|
| 1        | 12.510   | 0.747 | 595146 | 11400732 | 48.8354  |
| 2        | 19.460   | 1.770 | 378707 | 11944488 | 51.1646  |

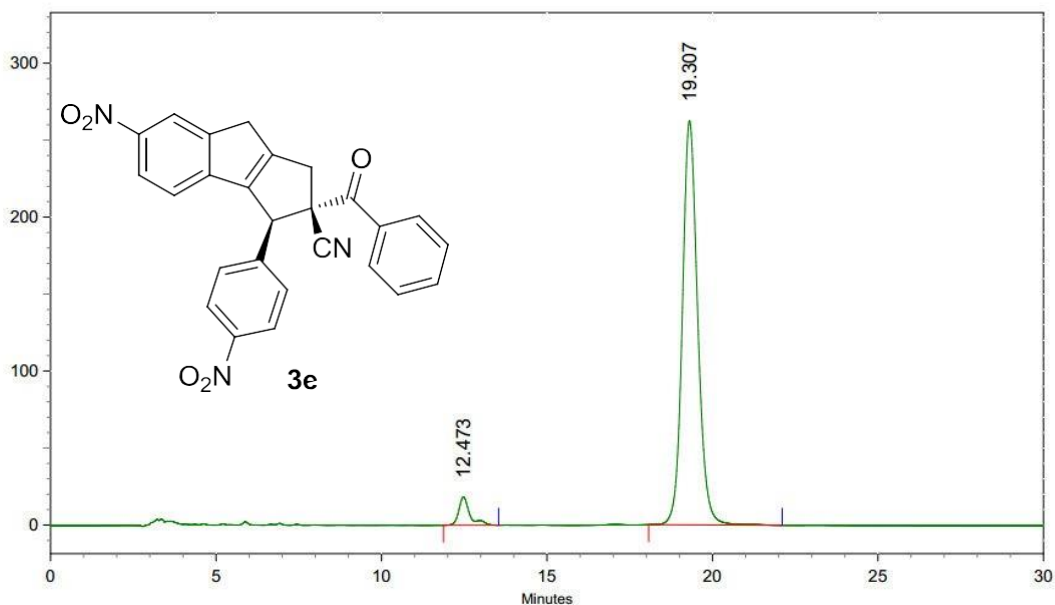

**AREA PERCENT REPORT**

| Peak No. | Ret Time | Width | Height  | Area      | Area [%] |
|----------|----------|-------|---------|-----------|----------|
| 1        | 12.473   | 1.667 | 307638  | 7123908   | 4.7871   |
| 2        | 19.307   | 4.040 | 4404650 | 141689719 | 95.2129  |

# Spectrum Plot Report

|                |                   |              |       |            |              |                   |                                   |
|----------------|-------------------|--------------|-------|------------|--------------|-------------------|-----------------------------------|
| Name           | CYC-20191025-12   | Rack Pos.    |       | Instrument | Instrument 1 | Operator          |                                   |
| Inj. Vol. (ul) | 10                | Plate Pos.   |       | IRM Status | Success      |                   |                                   |
| Data File      | CYC-20191025-12.d | Method (Acq) | TOF.m | Comment    |              | Acq. Time (Local) | 11/9/2019 11:13:19 AM (UTC+08:00) |

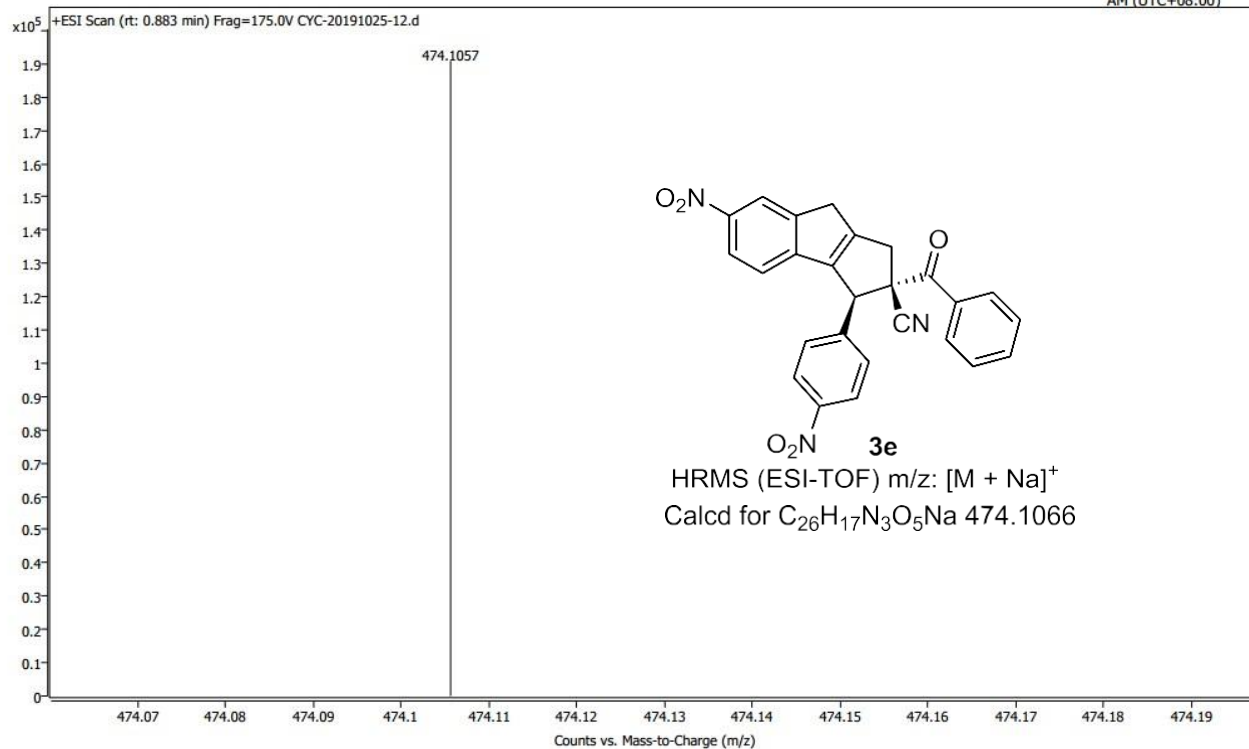

8.282  
8.085  
8.080  
8.065  
8.061  
7.925  
7.908  
7.517  
7.513  
7.499  
7.493  
7.478  
7.385  
7.381  
7.346  
7.342  
7.049  
6.963  
6.961  
6.943  
6.929

5.596

3.694  
3.689  
3.626  
3.620  
3.532  
3.482  
3.474

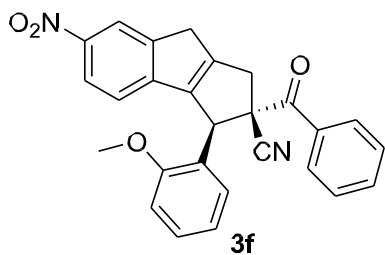

<sup>1</sup>H NMR (400 MHz, CDCl<sub>3</sub>)

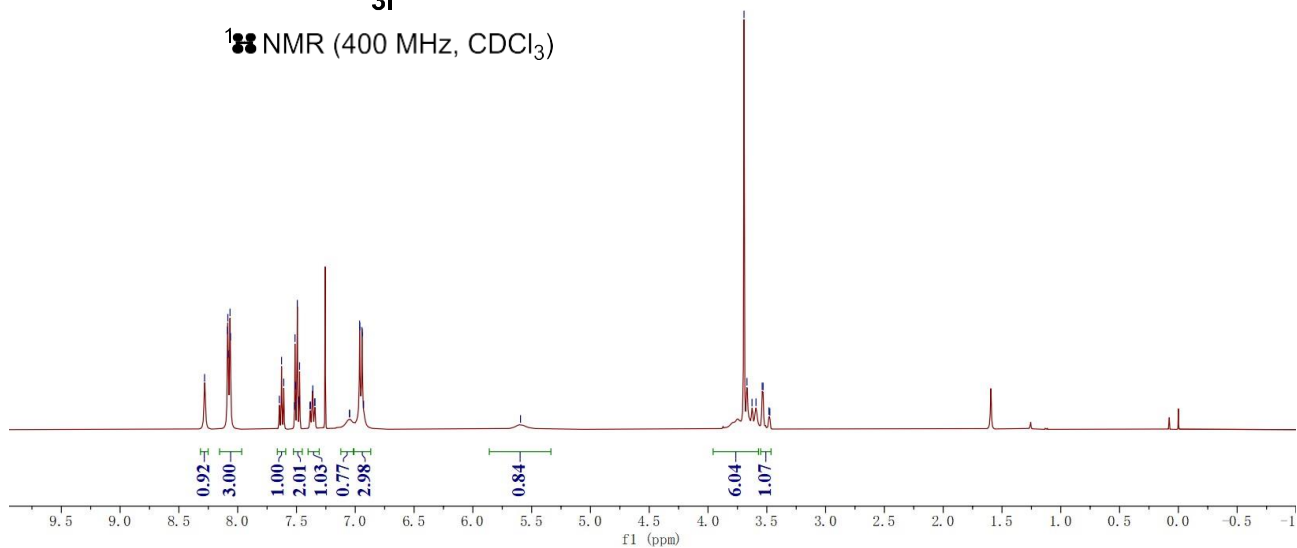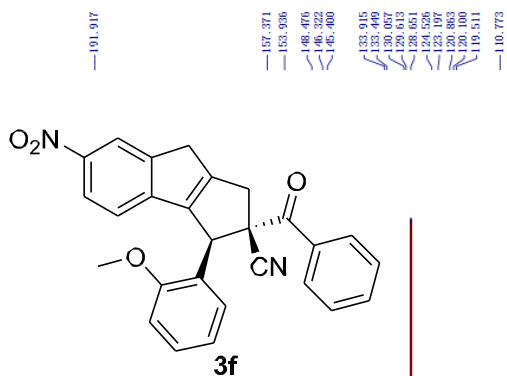

<sup>13</sup>C NMR (100 MHz, CDCl<sub>3</sub>)

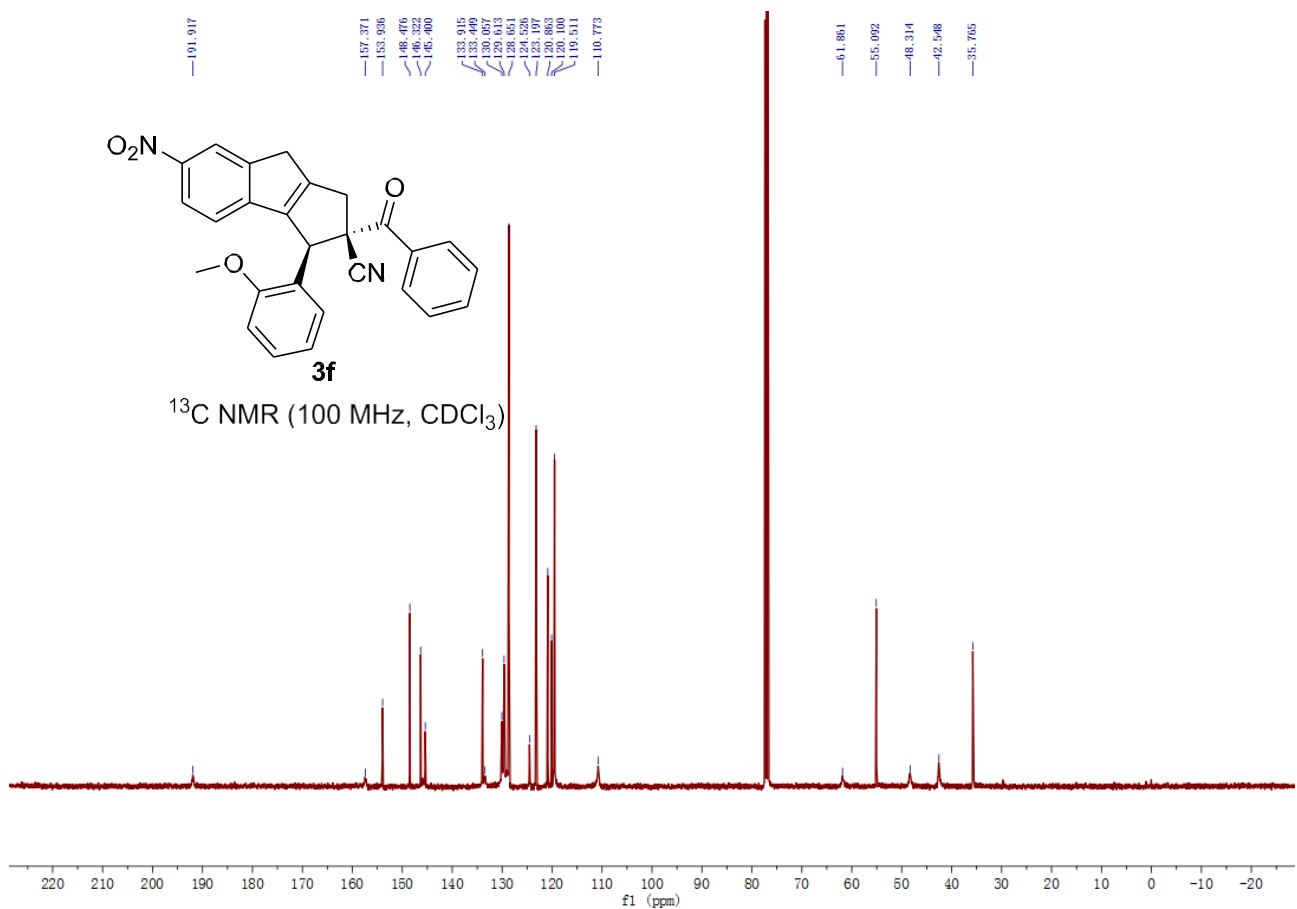

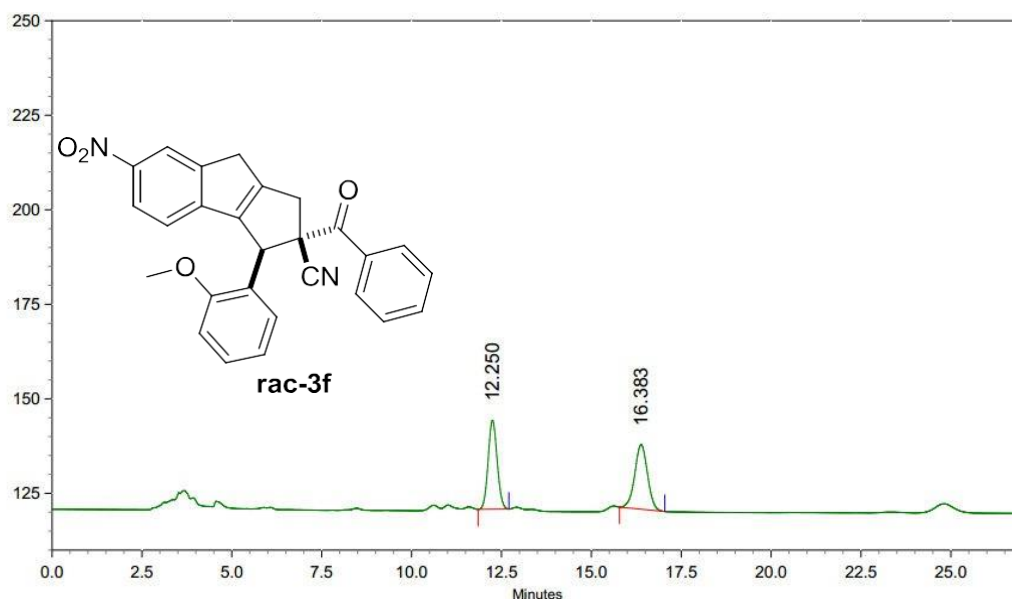

**AREA PERCENT REPORT**

| Peak No. | Ret Time | Width | Height | Area    | Area [%] |
|----------|----------|-------|--------|---------|----------|
| 1        | 12.250   | 0.857 | 394552 | 6888211 | 49.3050  |
| 2        | 16.383   | 1.260 | 287049 | 7082392 | 50.6950  |

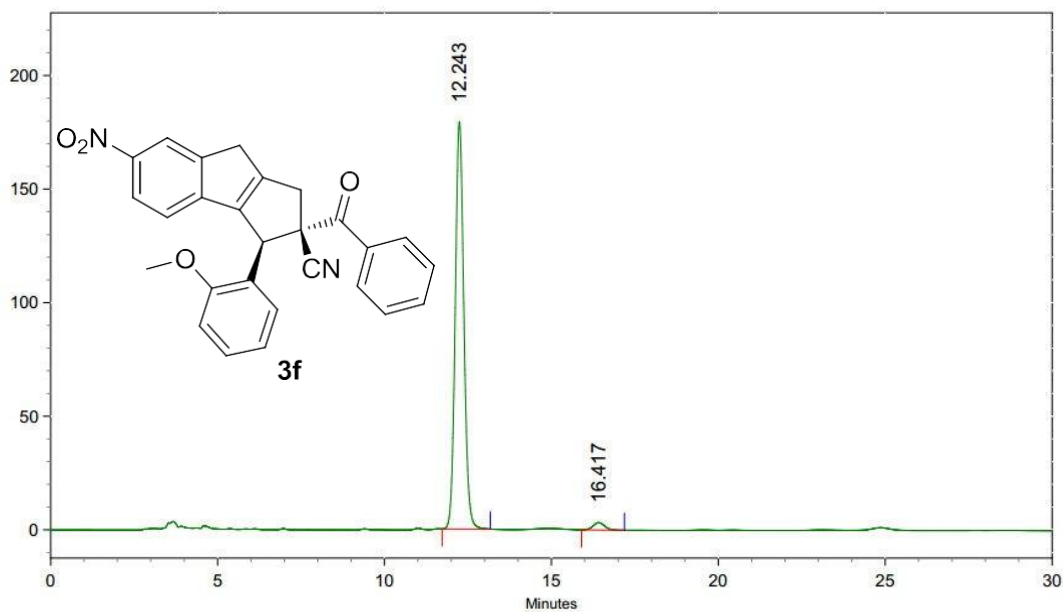

**AREA PERCENT REPORT**

| Peak No. | Ret Time | Width | Height  | Area     | Area [%] |
|----------|----------|-------|---------|----------|----------|
| 1        | 12.243   | 1.447 | 3007452 | 53967482 | 97.6296  |
| 2        | 16.417   | 1.283 | 54190   | 1310315  | 2.3704   |

# Spectrum Plot Report

|                |                  |              |       |            |              |                   |                                  |
|----------------|------------------|--------------|-------|------------|--------------|-------------------|----------------------------------|
| Name           | CYC-20191124-7   | Rack Pos.    |       | Instrument | Instrument 1 | Operator          |                                  |
| Inj. Vol. (ul) | 10               | Plate Pos.   |       | IRM Status | Success      |                   |                                  |
| Data File      | CYC-20191124-7.d | Method (Acq) | TOF.m | Comment    |              | Acq. Time (Local) | 12/5/2019 4:51:21 PM (UTC+08:00) |

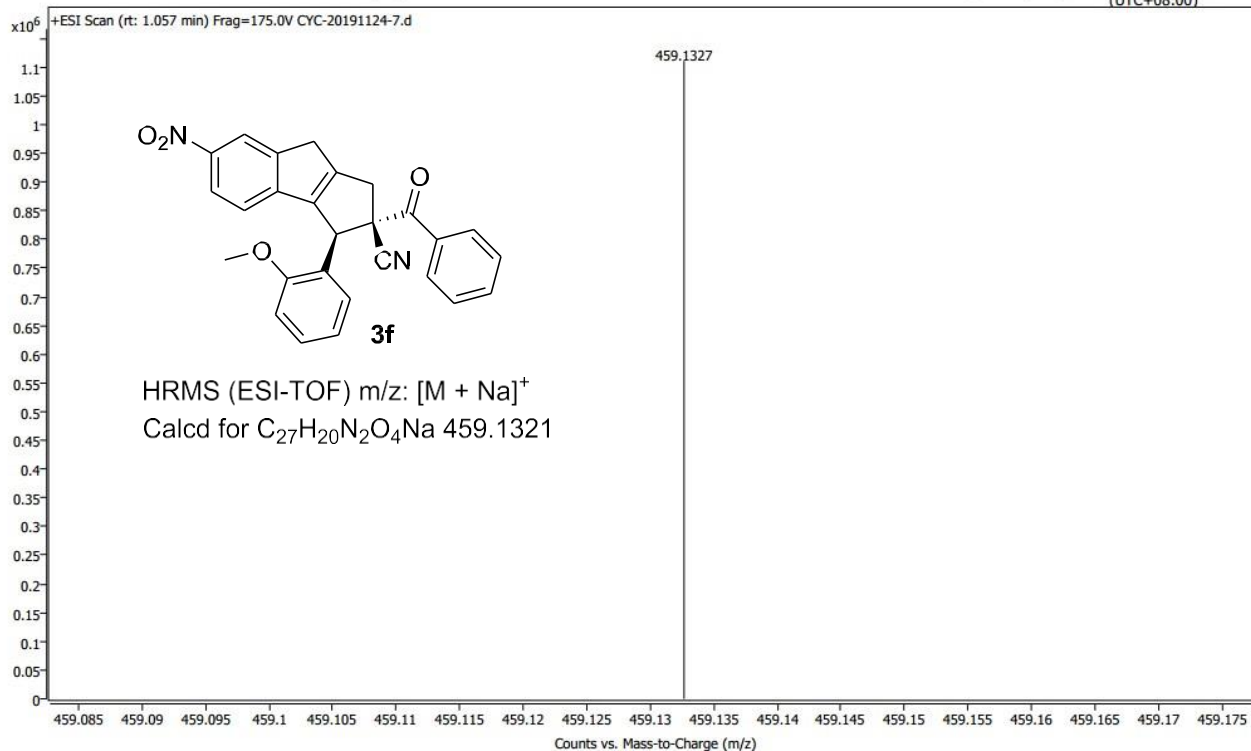

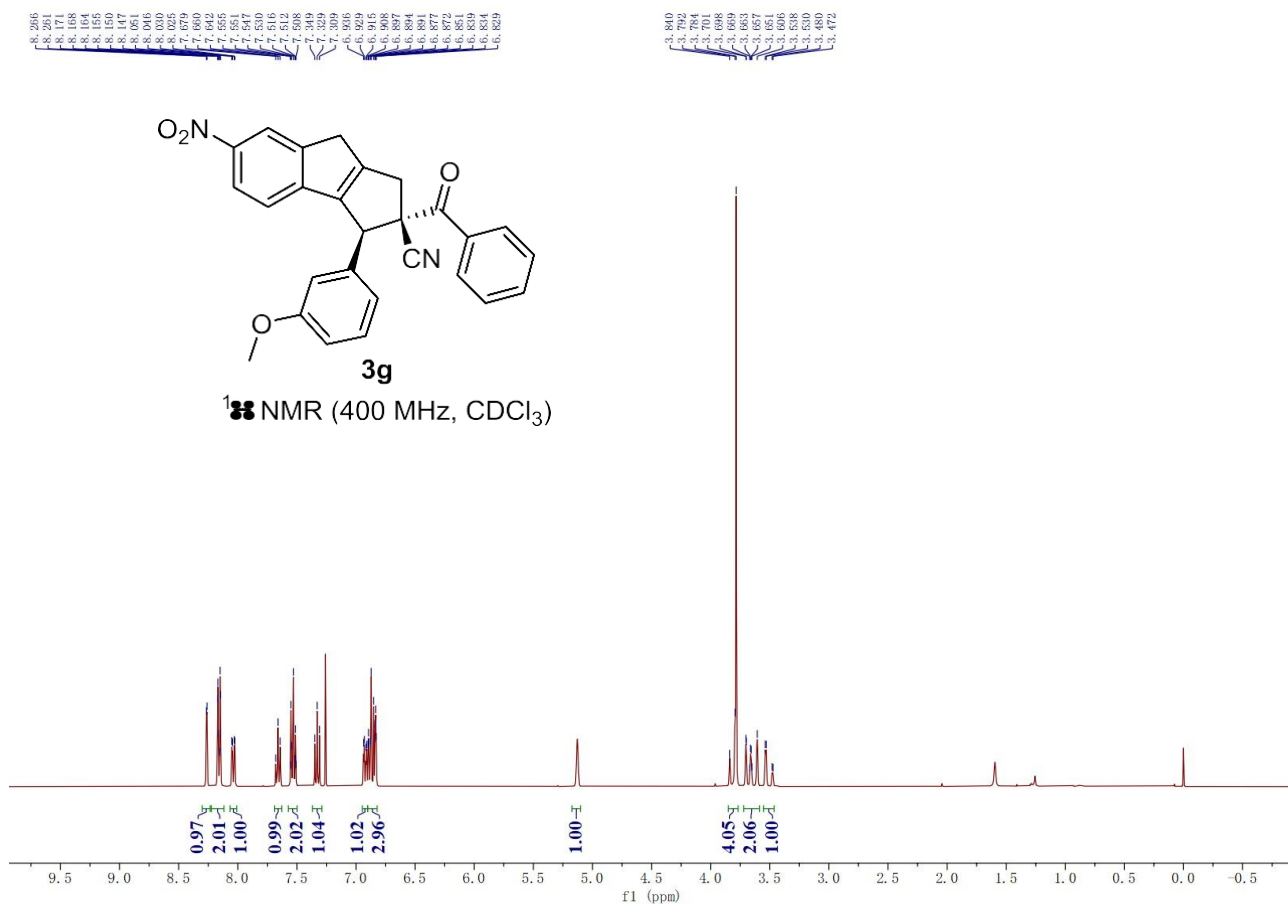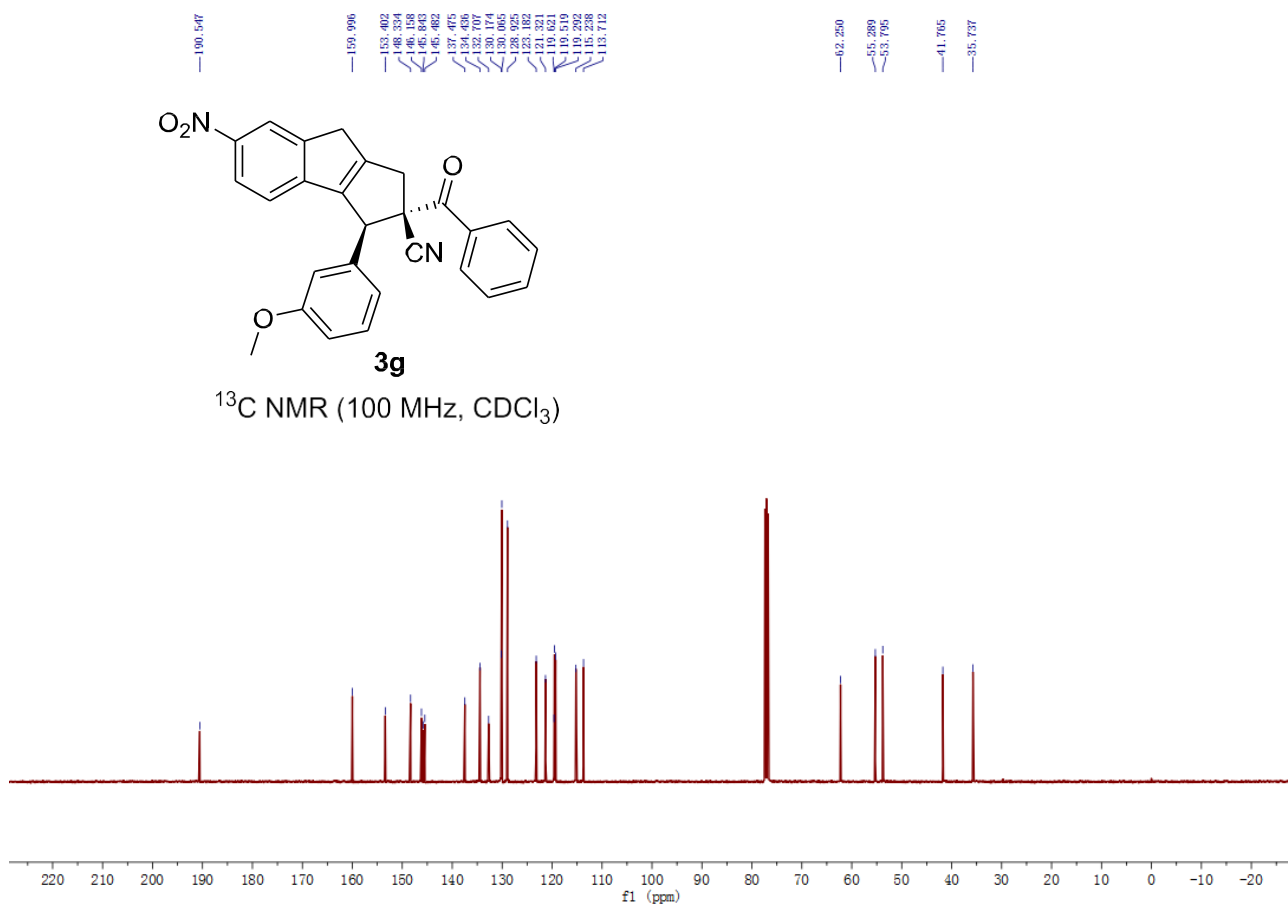

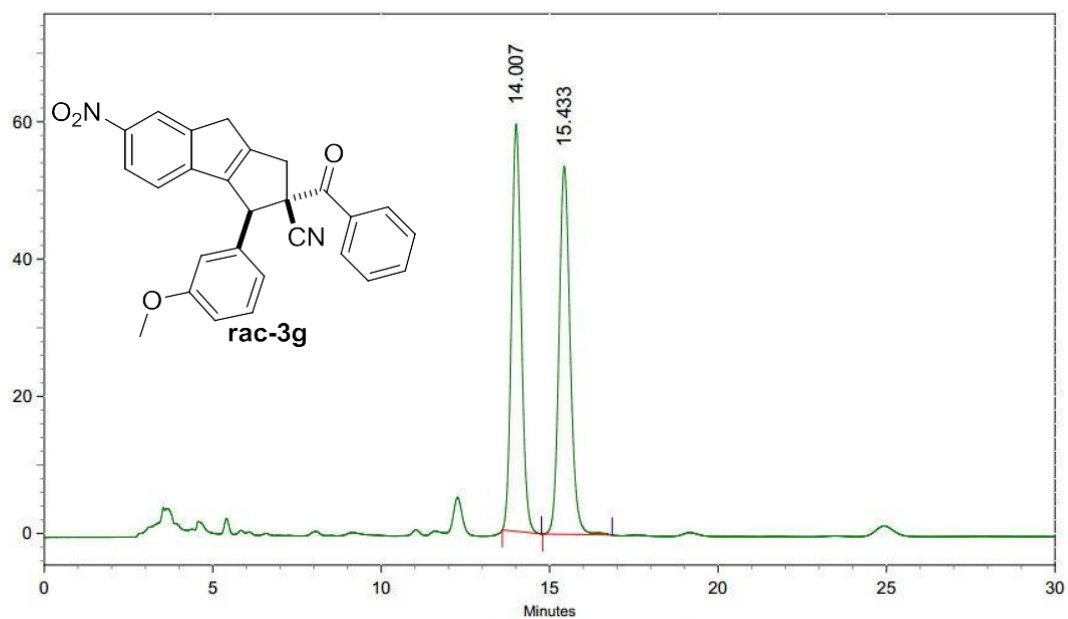

**AREA PERCENT REPORT**

| Peak No. | Ret Time | Width | Height | Area     | Area [%] |
|----------|----------|-------|--------|----------|----------|
| 1        | 14.007   | 1.160 | 995546 | 19941547 | 49.0340  |
| 2        | 15.433   | 2.063 | 899527 | 20727274 | 50.9660  |

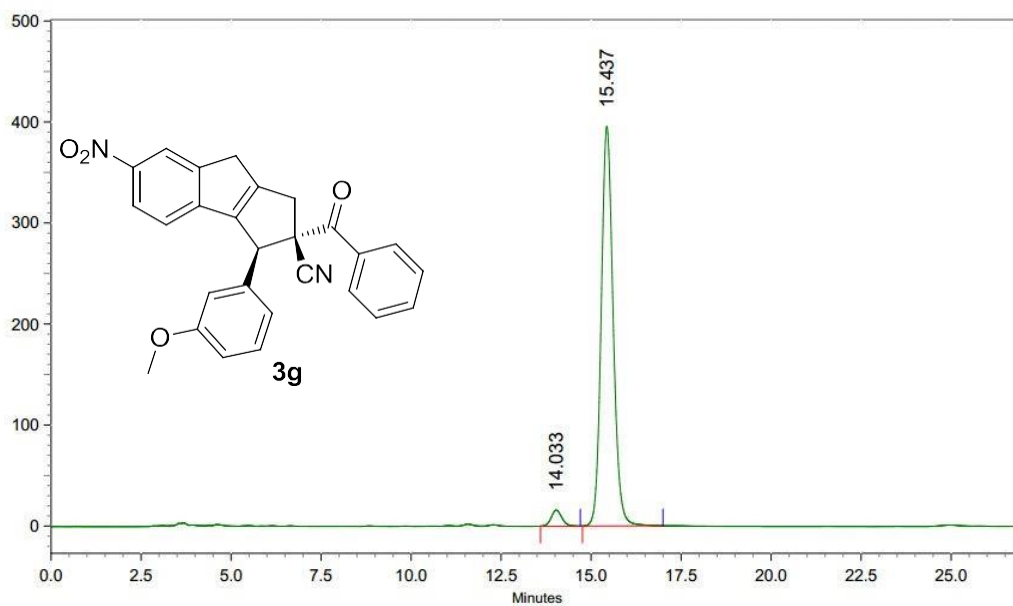

**AREA PERCENT REPORT**

| Peak No. | Ret Time | Width | Height  | Area      | Area [%] |
|----------|----------|-------|---------|-----------|----------|
| 1        | 14.033   | 1.103 | 265650  | 5415212   | 3.4250   |
| 2        | 15.437   | 2.237 | 6635977 | 152694927 | 96.5750  |

# Spectrum Plot Report

|                |                  |              |       |            |              |                   |                                  |
|----------------|------------------|--------------|-------|------------|--------------|-------------------|----------------------------------|
| Name           | CYC-20191124-8   | Rack Pos.    |       | Instrument | Instrument 1 | Operator          |                                  |
| Inj. Vol. (ul) | 10               | Plate Pos.   |       | IRM Status | Success      |                   |                                  |
| Data File      | CYC-20191124-8.d | Method (Acq) | TOF.m | Comment    |              | Acq. Time (Local) | 12/5/2019 4:54:21 PM (UTC+08:00) |

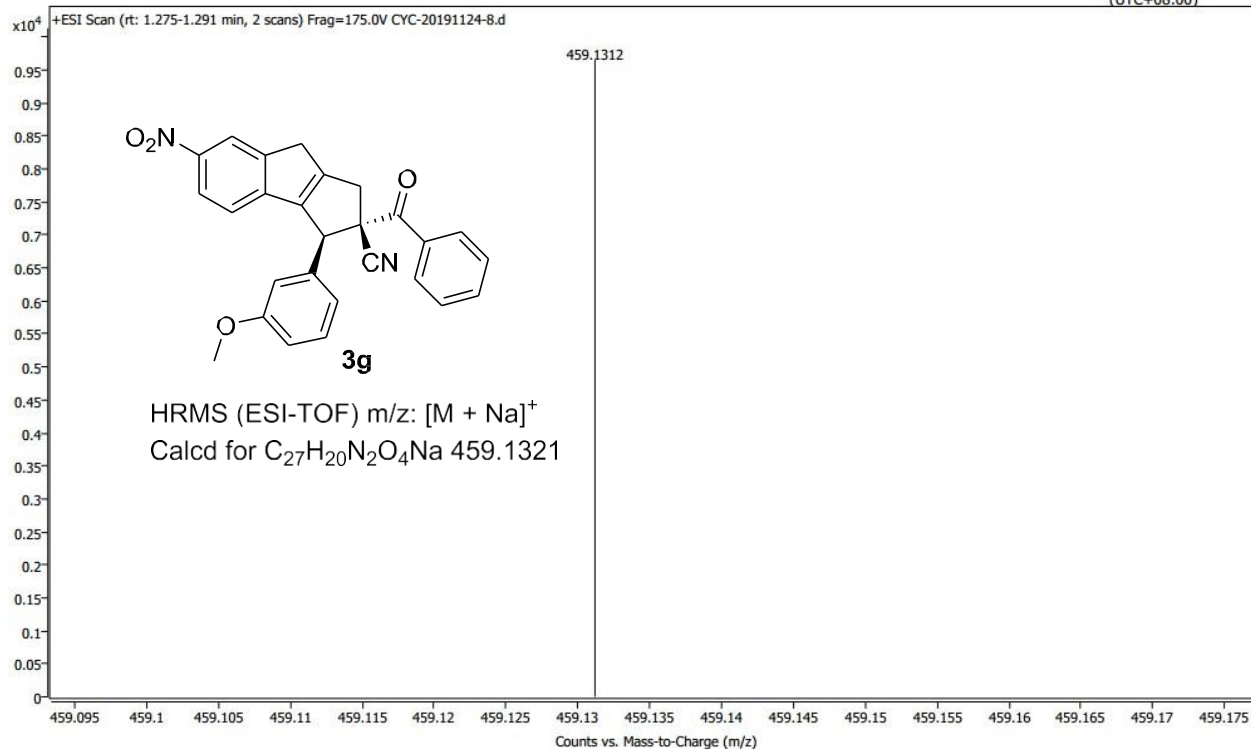



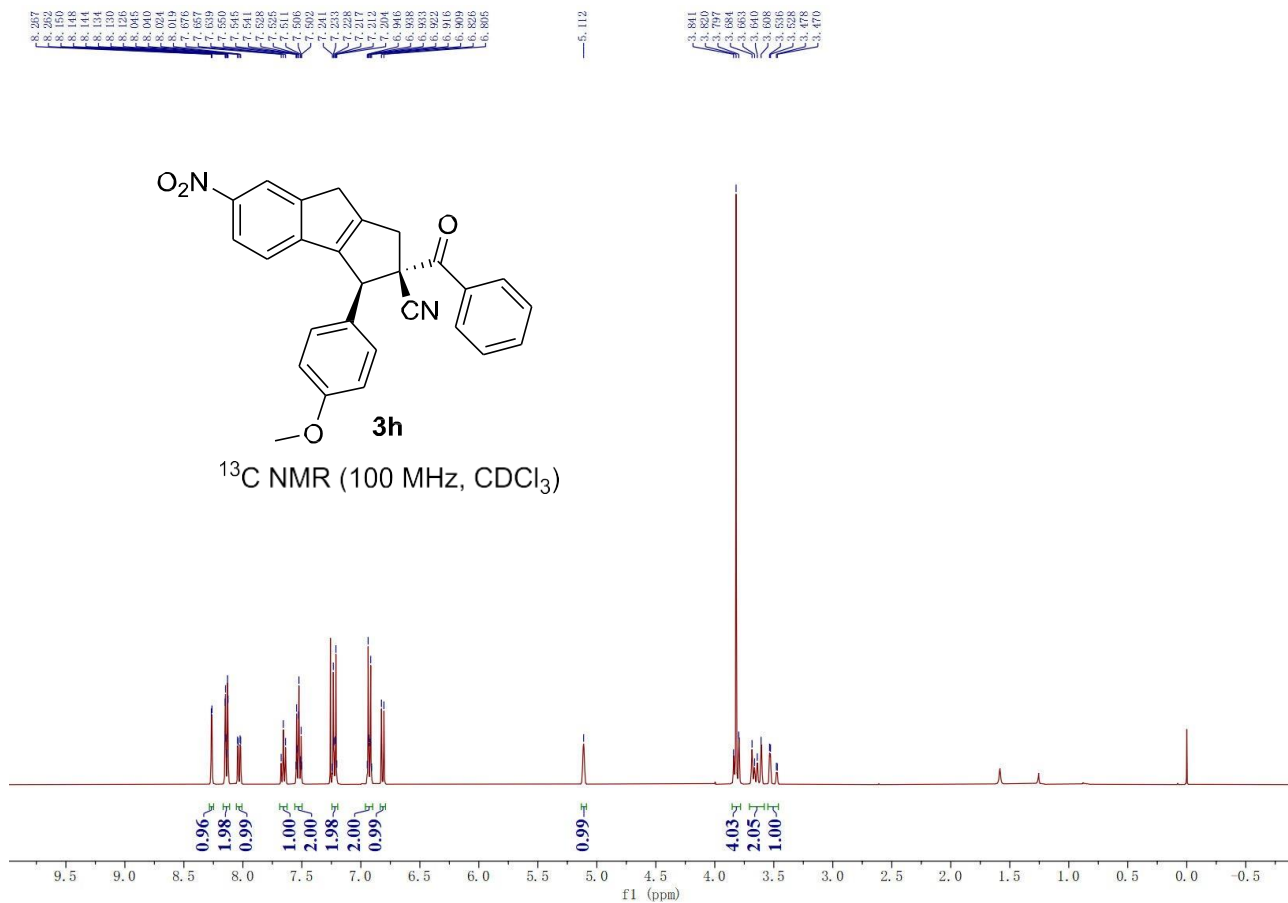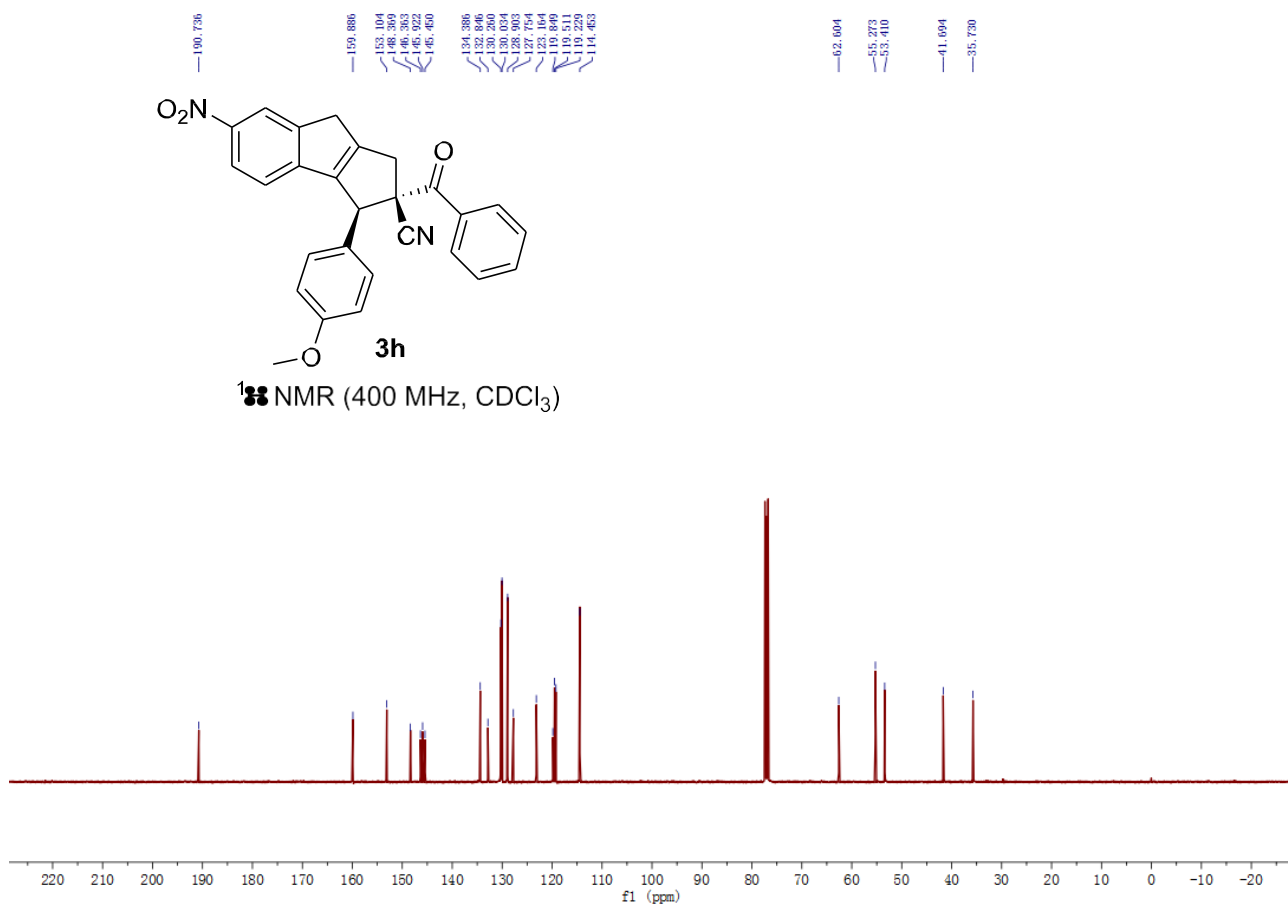

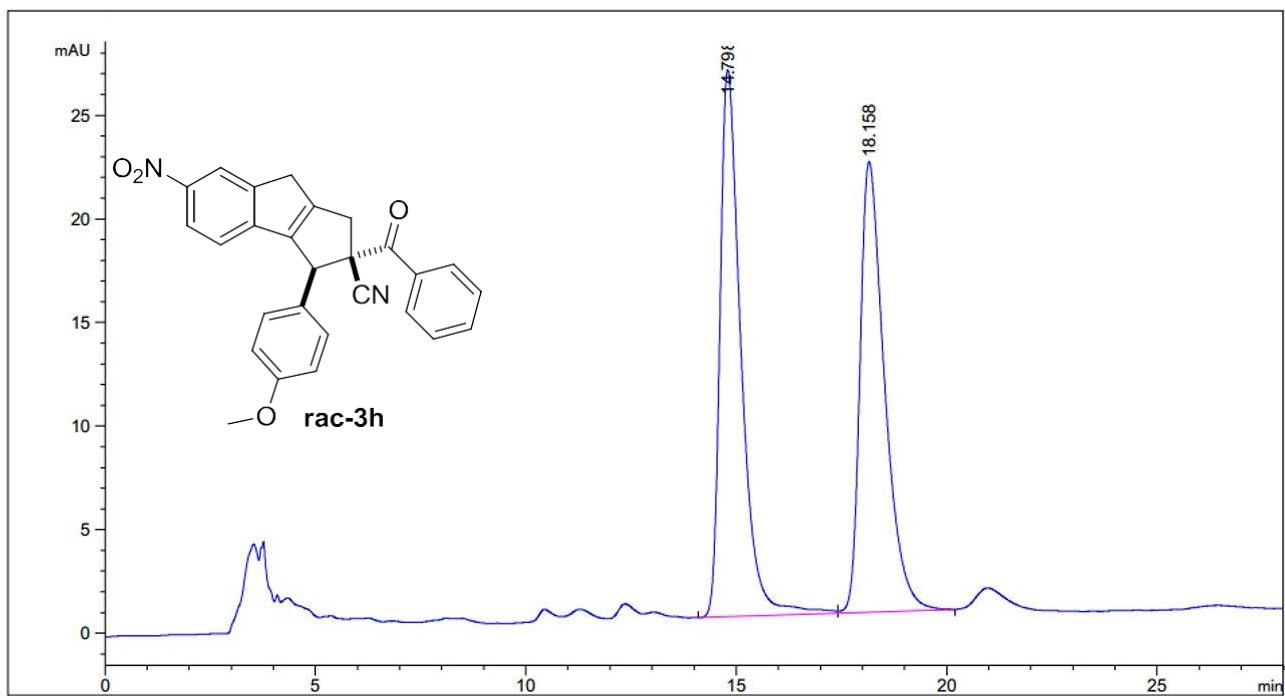

| # | [min]     | [min]  | [mAU*s]   | [mAU]    | %       |
|---|-----------|--------|-----------|----------|---------|
| 1 | 14.798 BV | 0.5185 | 916.68500 | 26.41159 | 51.0173 |
| 2 | 18.158 VB | 0.6032 | 880.12616 | 21.74638 | 48.9827 |

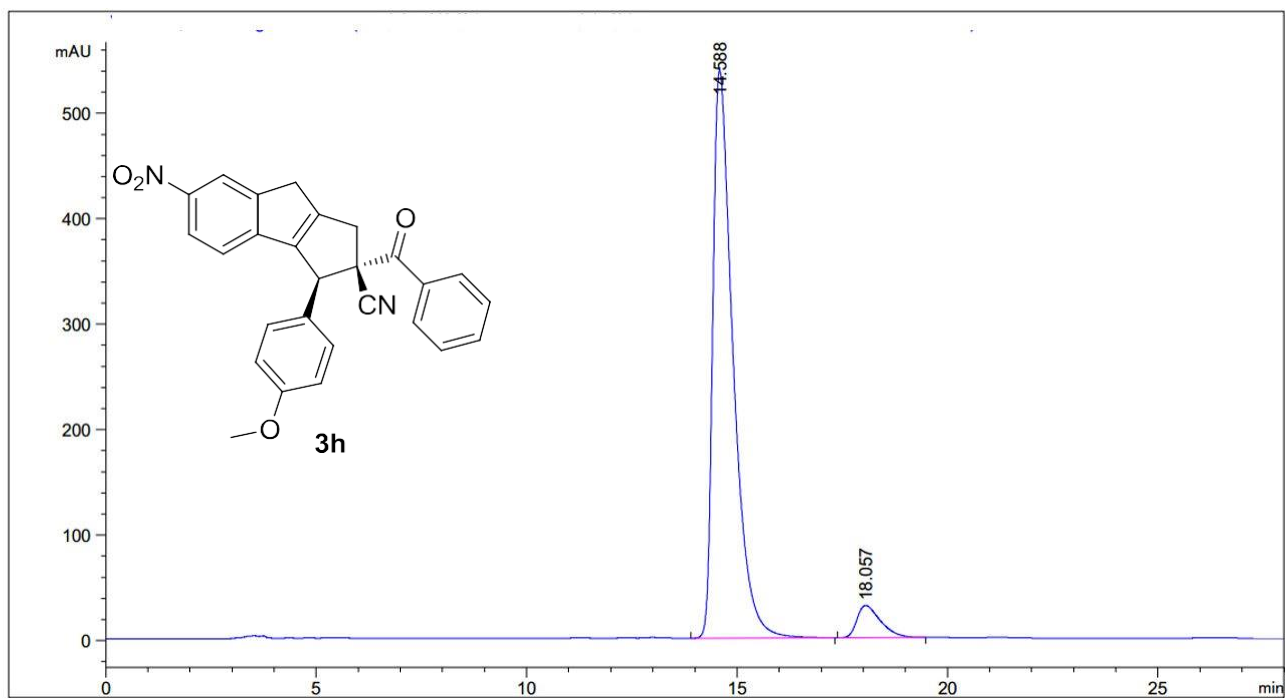

| # | [min]     | [min]  | [mAU*s]    | [mAU]     | %       |
|---|-----------|--------|------------|-----------|---------|
| 1 | 14.588 BB | 0.4998 | 1.79586e4  | 538.46021 | 93.7801 |
| 2 | 18.057 BB | 0.5876 | 1191.10168 | 30.62966  | 6.2199  |

# Spectrum Plot Report

|                |                   |              |       |            |              |                   |                                   |
|----------------|-------------------|--------------|-------|------------|--------------|-------------------|-----------------------------------|
| Name           | CYC-20191018-60   | Rack Pos.    |       | Instrument | Instrument 1 | Operator          |                                   |
| Inj. Vol. (ul) | 10                | Plate Pos.   |       | IRM Status | Success      |                   |                                   |
| Data File      | CYC-20191018-60.d | Method (Acq) | TOF.m | Comment    |              | Acq. Time (Local) | 10/29/2019 3:55:22 PM (UTC+08:00) |

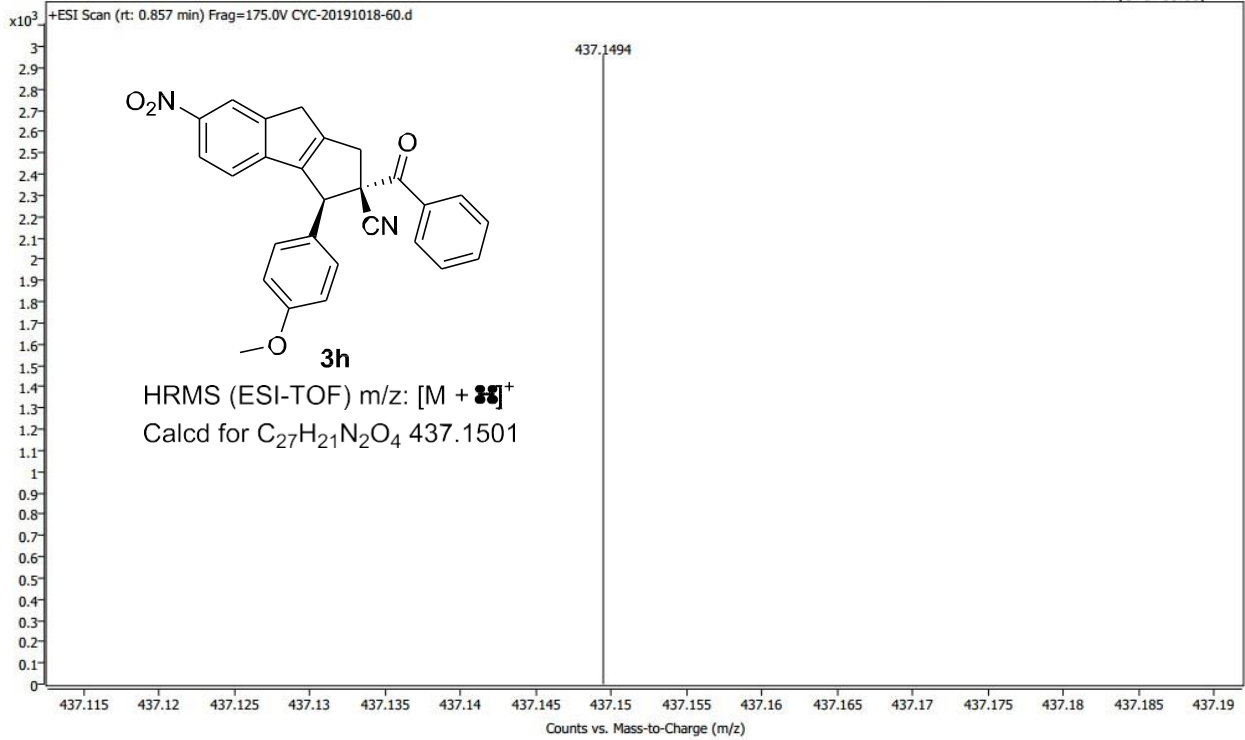

8.281  
8.276  
8.185  
8.182  
8.179  
8.169  
8.164  
8.161  
8.152  
7.987  
7.961  
7.956  
7.887  
7.885  
7.869  
7.855  
7.851  
7.845  
7.835  
7.822  
7.816  
7.807  
7.801  
7.797  
7.679  
7.661  
7.642  
7.538  
7.533  
7.523  
7.515  
7.508  
7.504  
7.499  
7.391  
7.389  
7.379  
7.365  
6.794  
6.336

3.887  
3.783  
3.738  
3.716  
3.611  
3.582  
3.542  
3.504

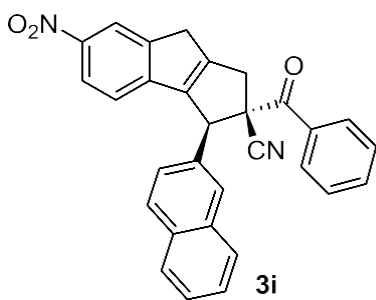

$^1\text{H NMR}$  (400 MHz,  $\text{CDCl}_3$ )

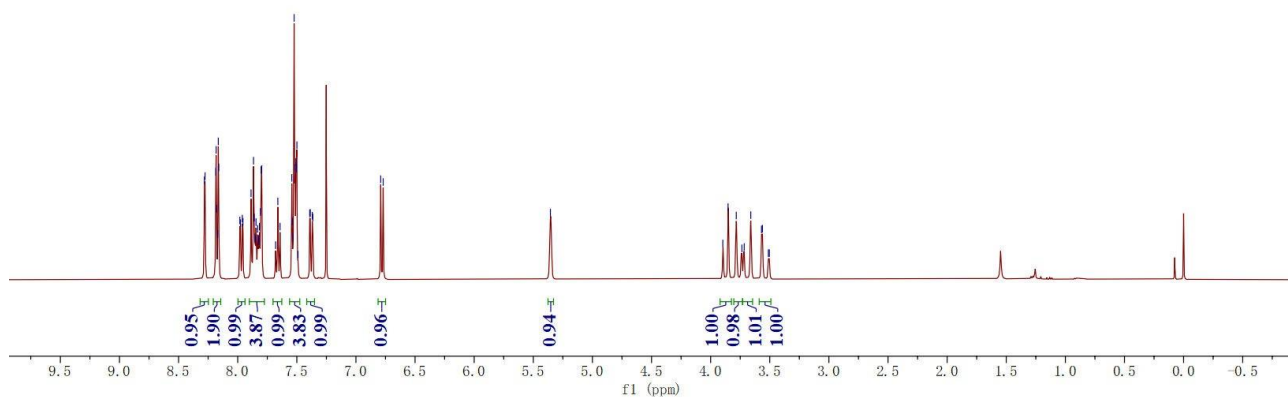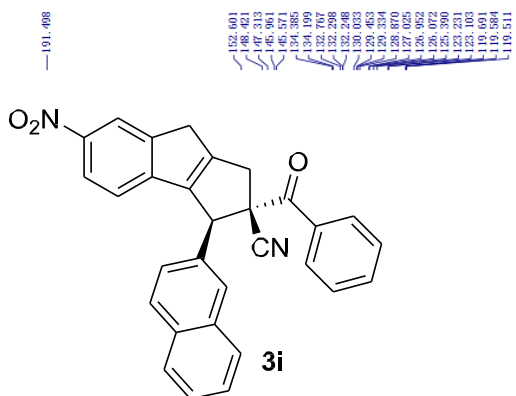

$^{13}\text{C NMR}$  (100 MHz,  $\text{CDCl}_3$ )

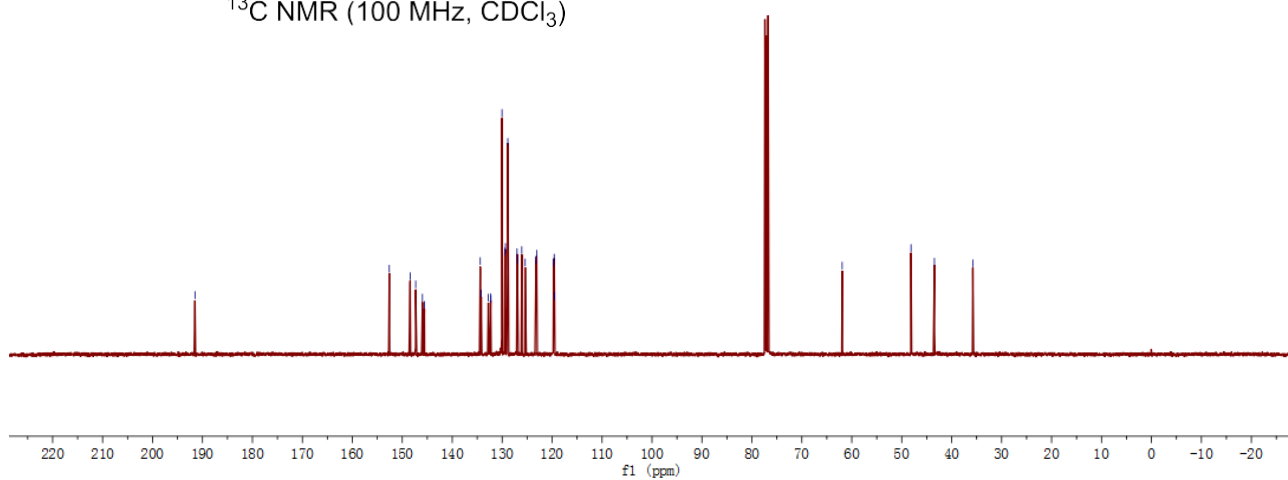

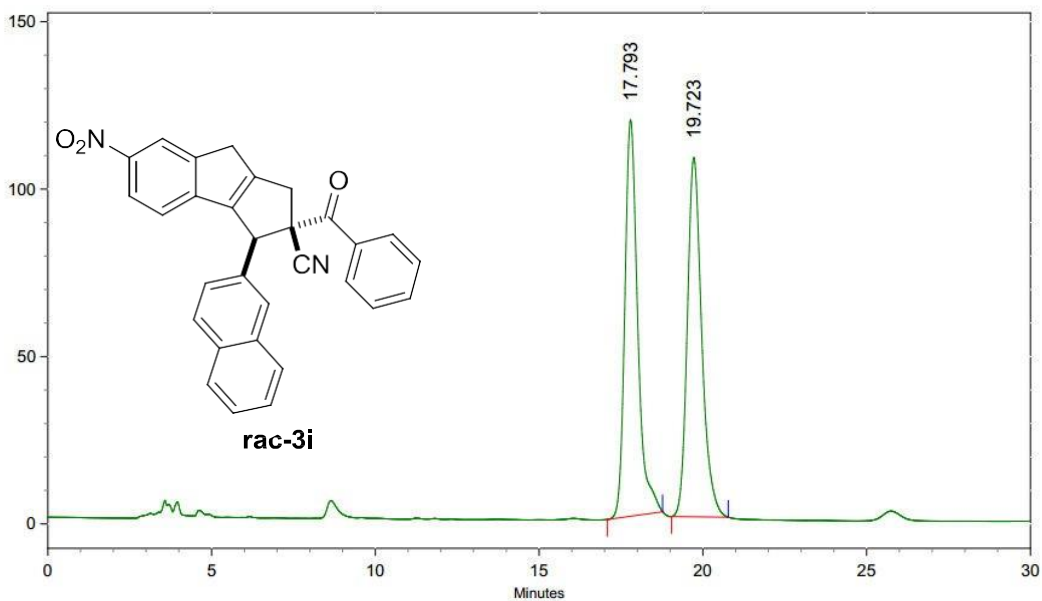

**AREA PERCENT REPORT**

| Peak No. | Ret Time | Width | Height  | Area     | Area [%] |
|----------|----------|-------|---------|----------|----------|
| 1        | 17.793   | 1.690 | 1985813 | 54130810 | 49.5316  |
| 2        | 19.723   | 1.727 | 1800208 | 55154706 | 50.4684  |

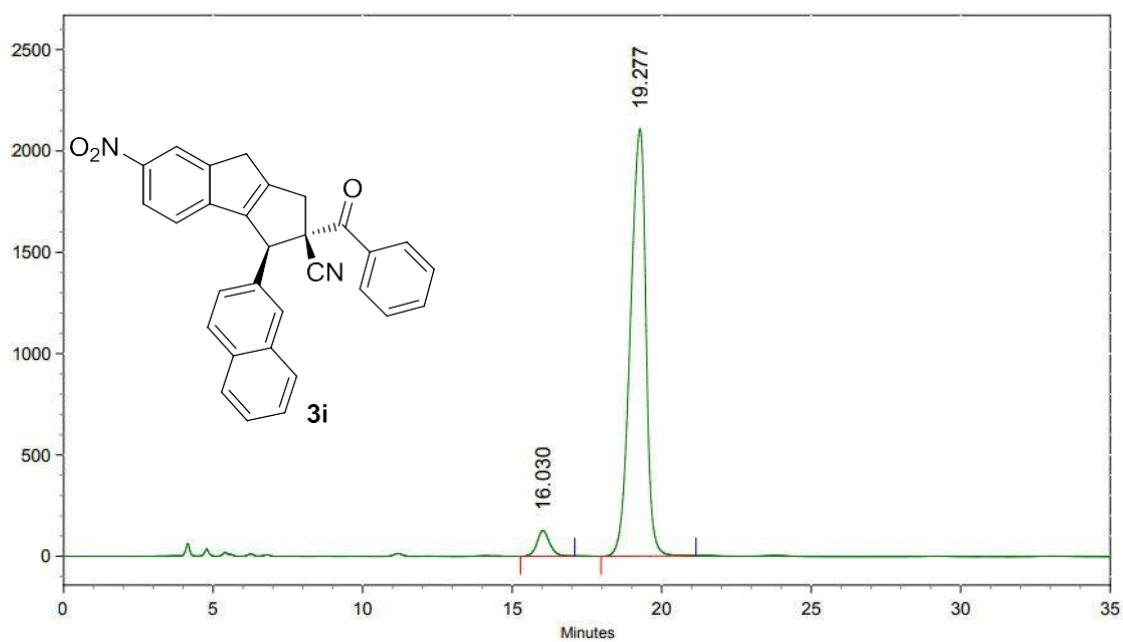

**AREA PERCENT REPORT**

| Peak No. | Ret Time | Width | Height   | Area       | Area [%] |
|----------|----------|-------|----------|------------|----------|
| 1        | 16.030   | 1.817 | 2130800  | 62356236   | 4.6631   |
| 2        | 19.277   | 3.173 | 35341117 | 1274867679 | 95.3369  |

# Spectrum Plot Report

|                |                   |              |       |            |              |                   |                                   |
|----------------|-------------------|--------------|-------|------------|--------------|-------------------|-----------------------------------|
| Name           | CYC-20191018-67   | Rack Pos.    |       | Instrument | Instrument 1 | Operator          |                                   |
| Inj. Vol. (ul) | 10                | Plate Pos.   |       | IRM Status | Success      |                   |                                   |
| Data File      | CYC-20191018-67.d | Method (Acq) | TOF.m | Comment    |              | Acq. Time (Local) | 10/29/2019 4:16:28 PM (UTC+08:00) |

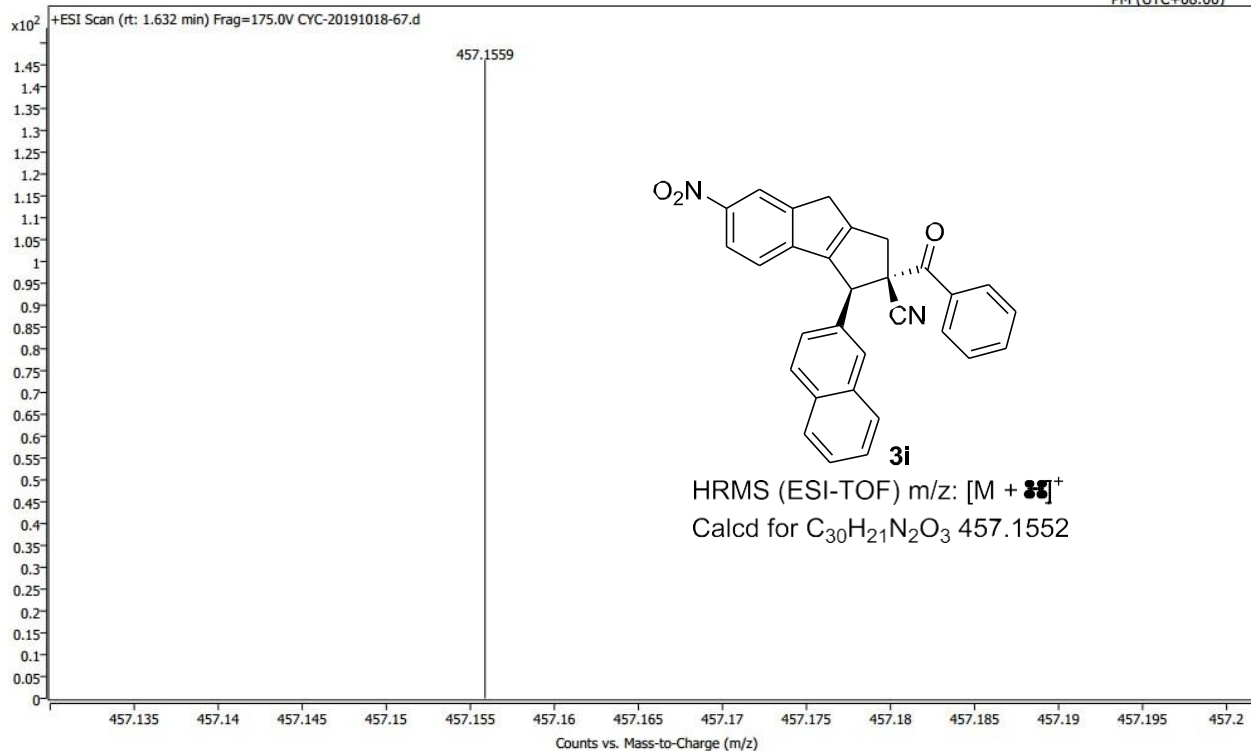

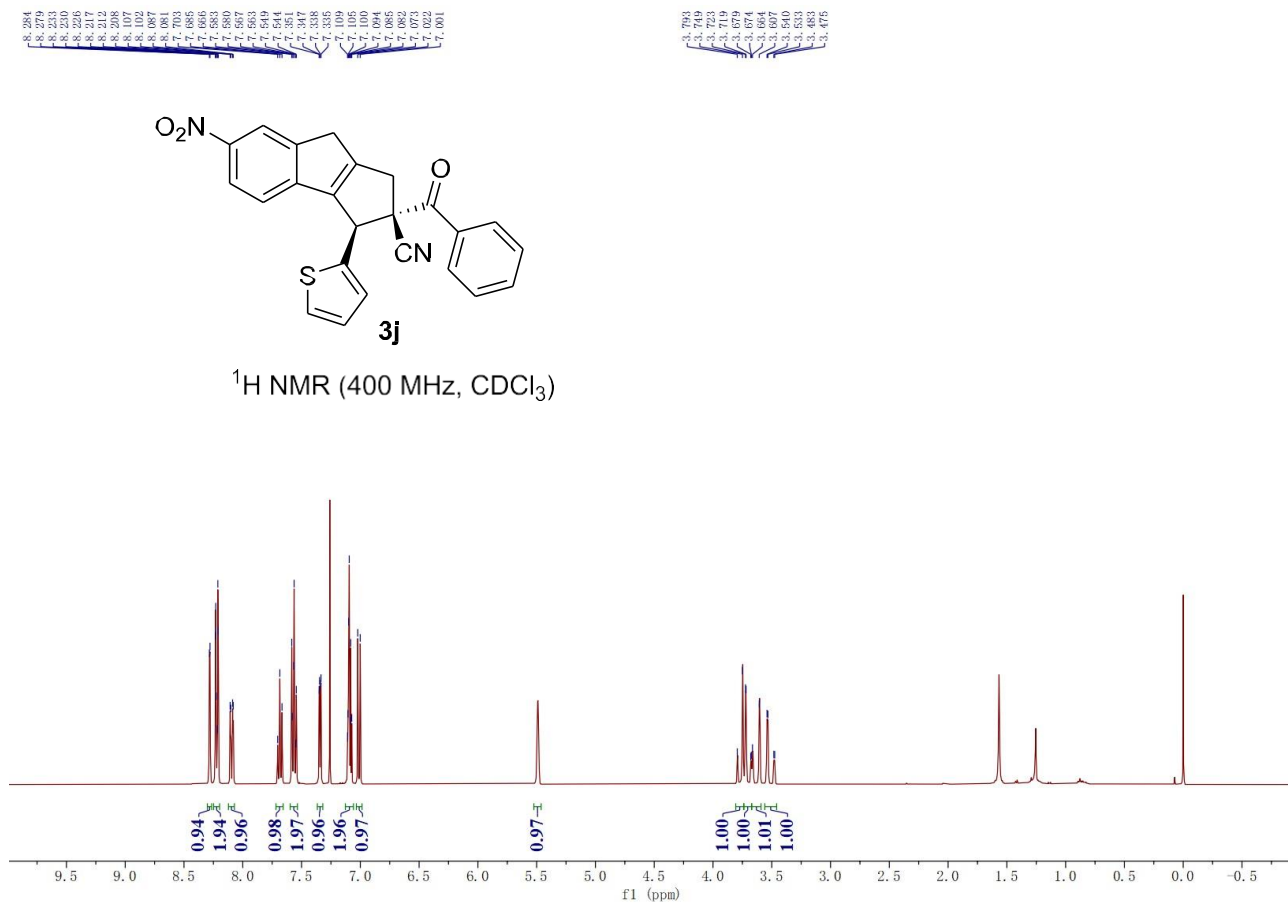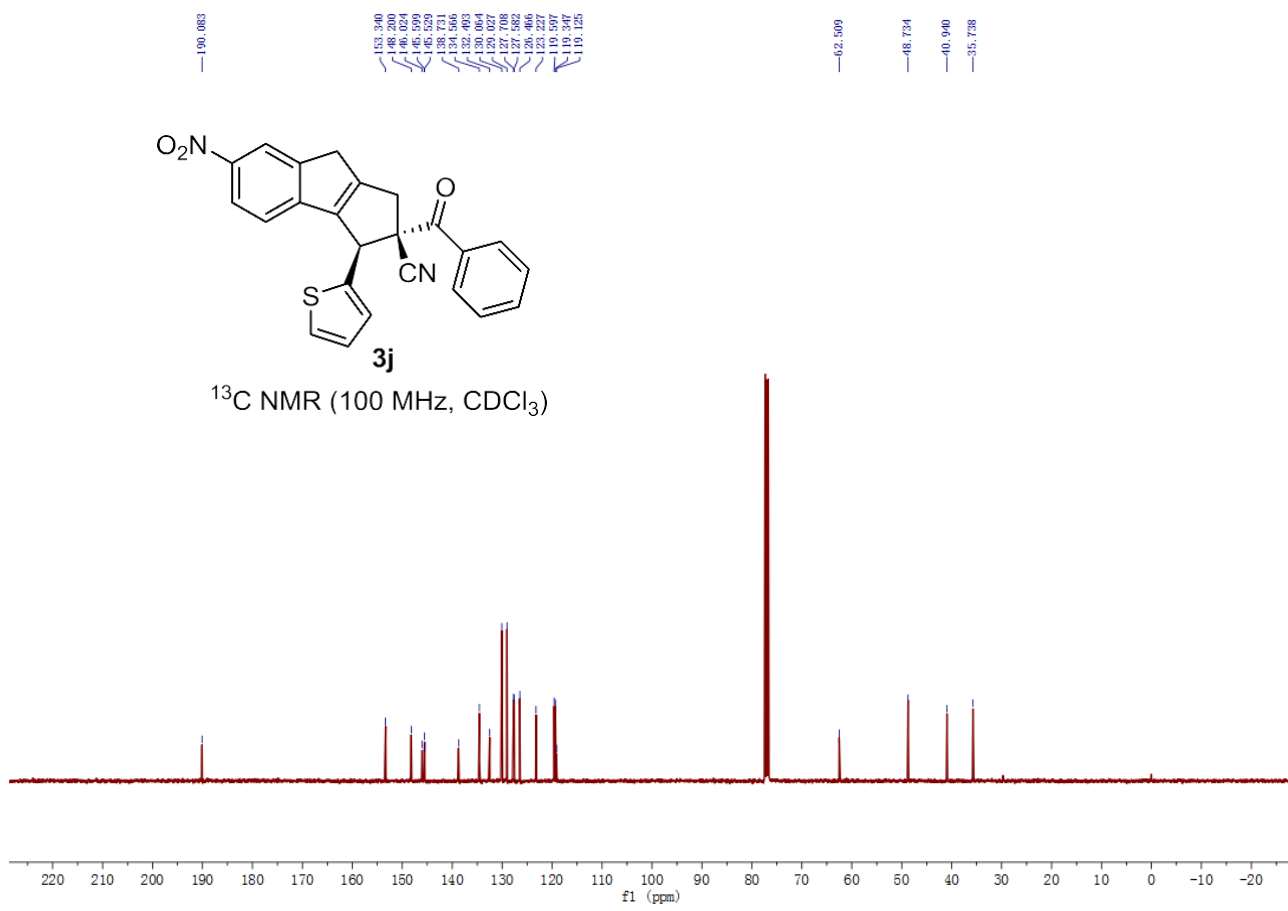

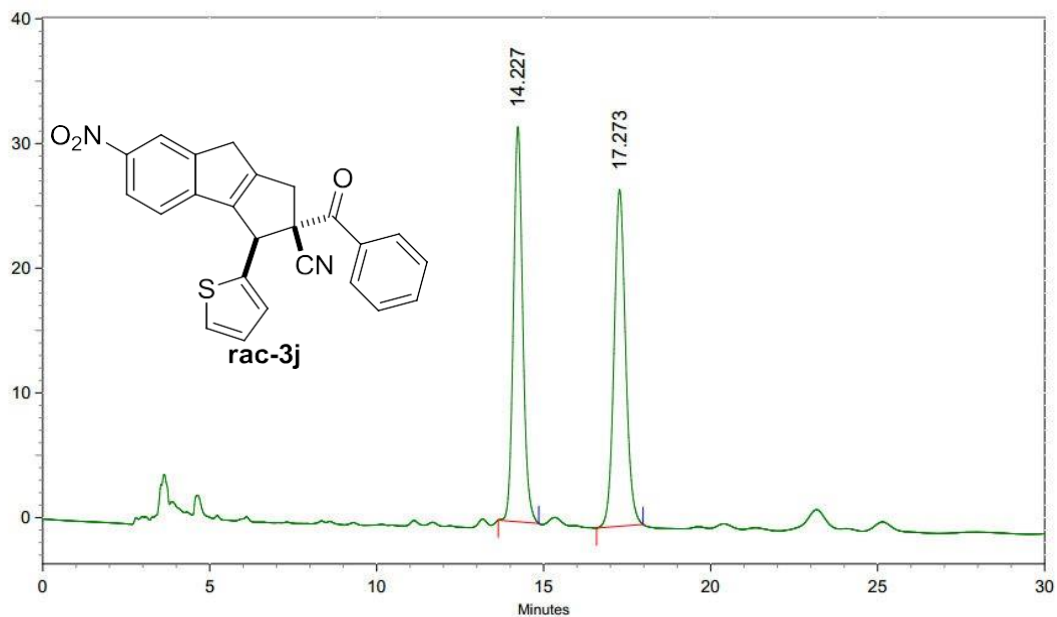

**AREA PERCENT REPORT**

| Peak No. | Ret Time | Width | Height | Area     | Area [%] |
|----------|----------|-------|--------|----------|----------|
| 1        | 14.227   | 1.213 | 531413 | 10359157 | 48.7273  |
| 2        | 17.273   | 1.393 | 452753 | 10900289 | 51.2727  |

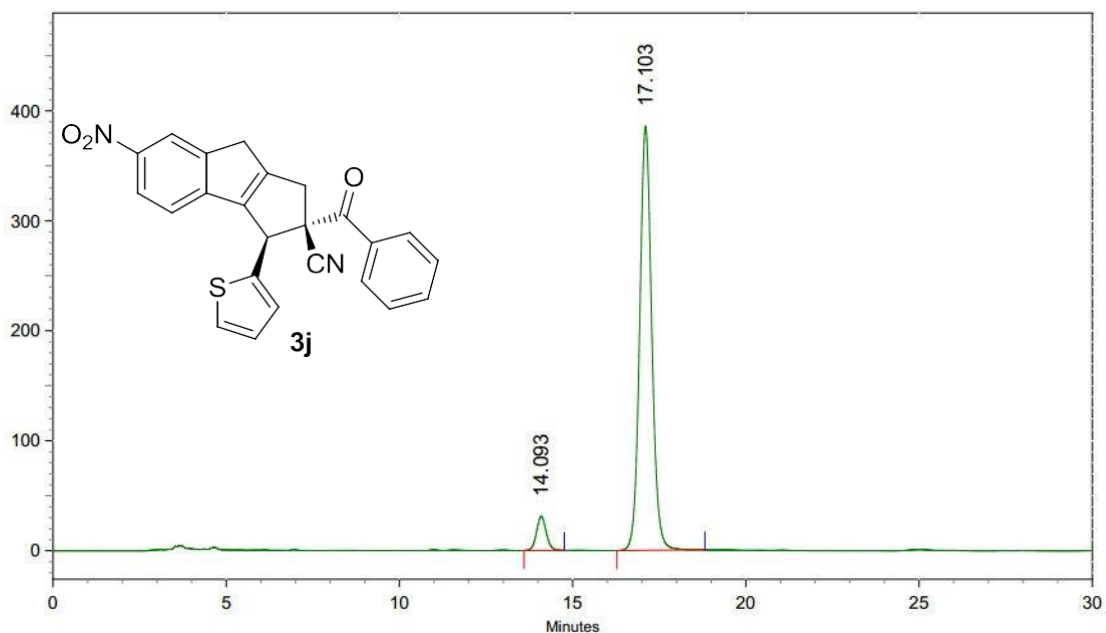

**AREA PERCENT REPORT**

| Peak No. | Ret Time | Width | Height  | Area      | Area [%] |
|----------|----------|-------|---------|-----------|----------|
| 1        | 14.093   | 1.163 | 521715  | 10180607  | 6.1114   |
| 2        | 17.103   | 2.537 | 6470737 | 156403300 | 93.8886  |



# Spectrum Plot Report

|                |                   |              |       |            |              |                   |                                   |
|----------------|-------------------|--------------|-------|------------|--------------|-------------------|-----------------------------------|
| Name           | CYC-20191025-13   | Rack Pos.    |       | Instrument | Instrument 1 | Operator          |                                   |
| Inj. Vol. (ul) | 10                | Plate Pos.   |       | IRM Status | Success      |                   |                                   |
| Data File      | CYC-20191025-13.d | Method (Acq) | TOF.m | Comment    |              | Acq. Time (Local) | 11/9/2019 11:16:18 AM (UTC+08:00) |

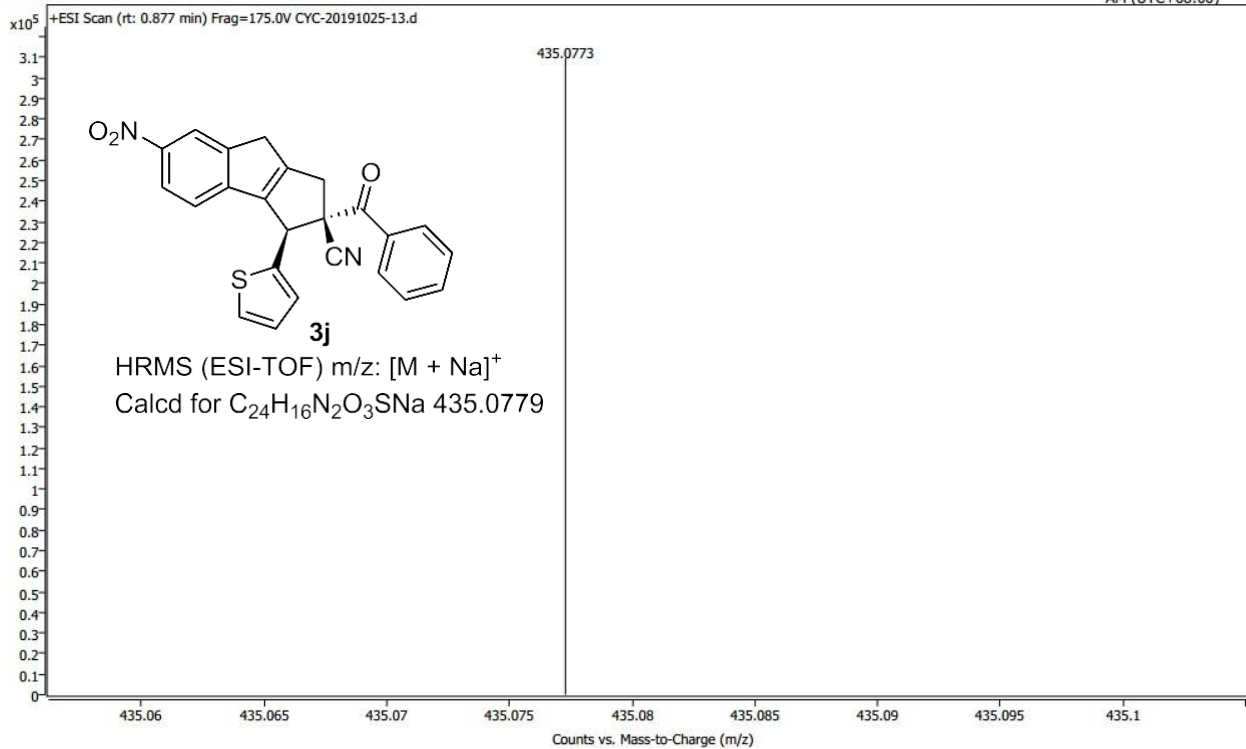

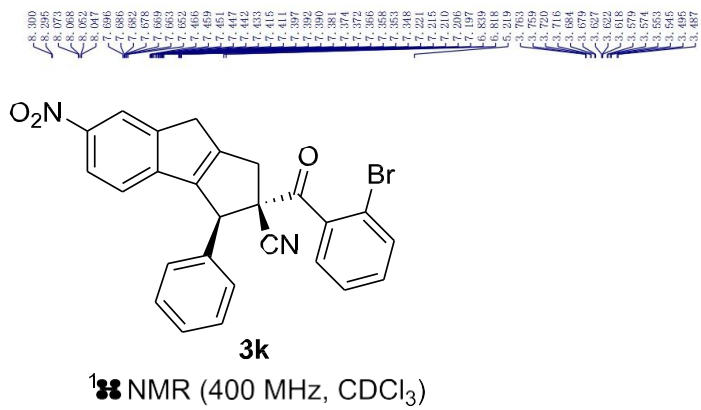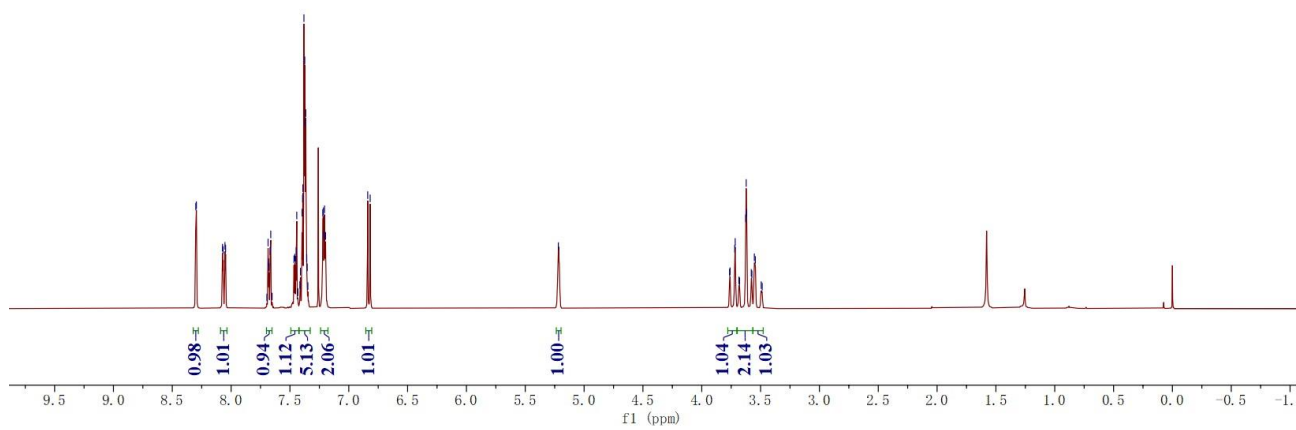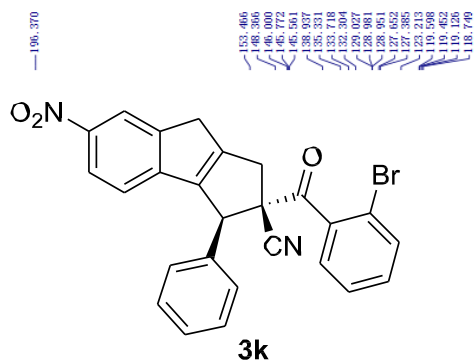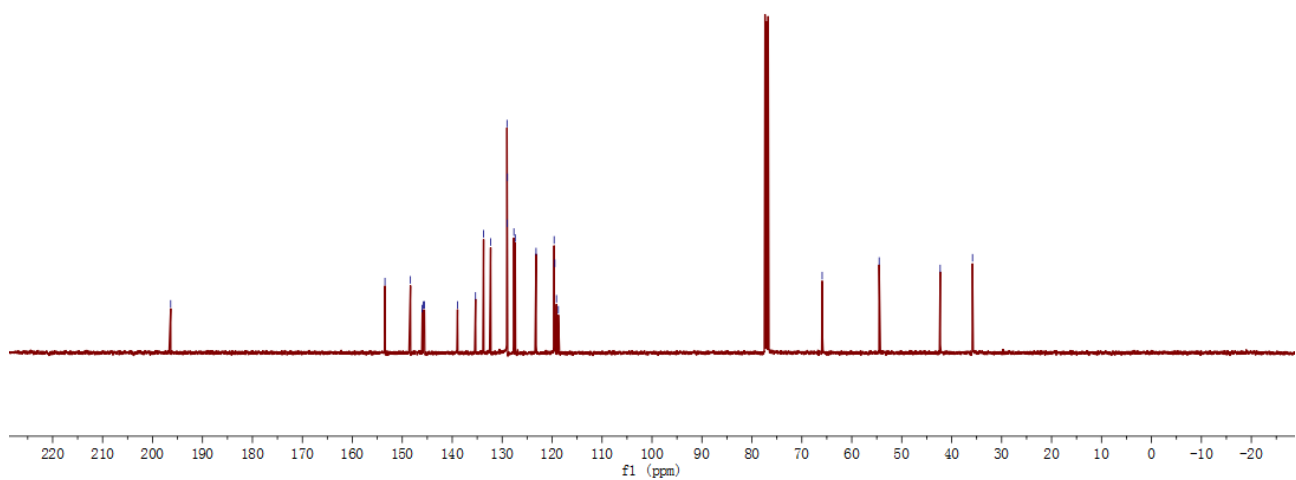

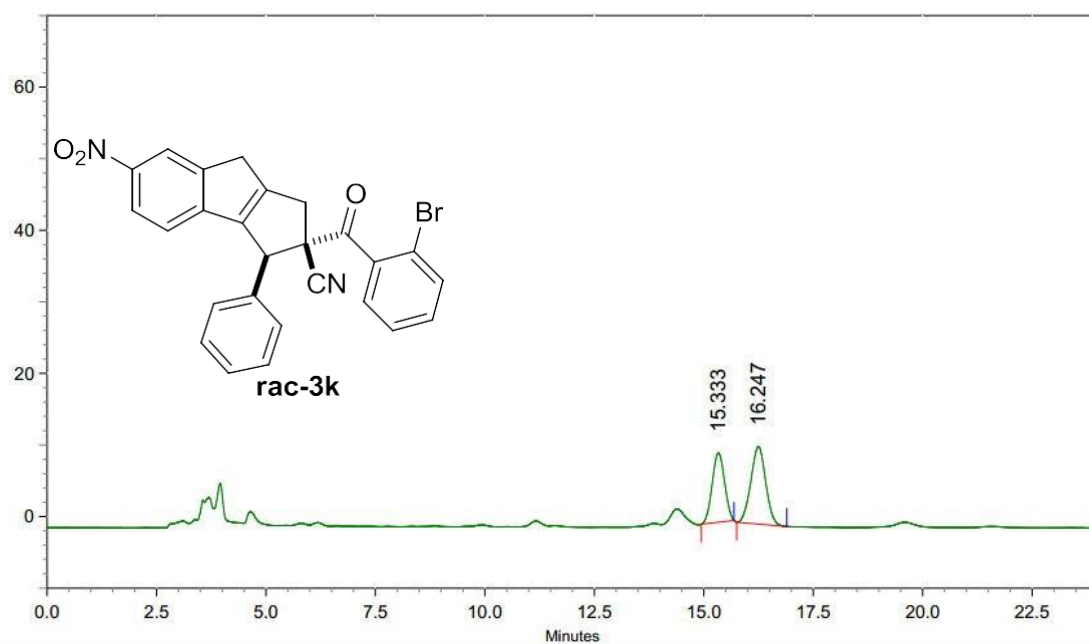

### AREA PERCENT REPORT

| Peak No. | Ret Time | Width | Height | Area    | Area [%] |
|----------|----------|-------|--------|---------|----------|
| 1        | 15.333   | 0.743 | 162762 | 3189159 | 42.6258  |
| 2        | 16.247   | 1.143 | 182088 | 4292591 | 57.3742  |

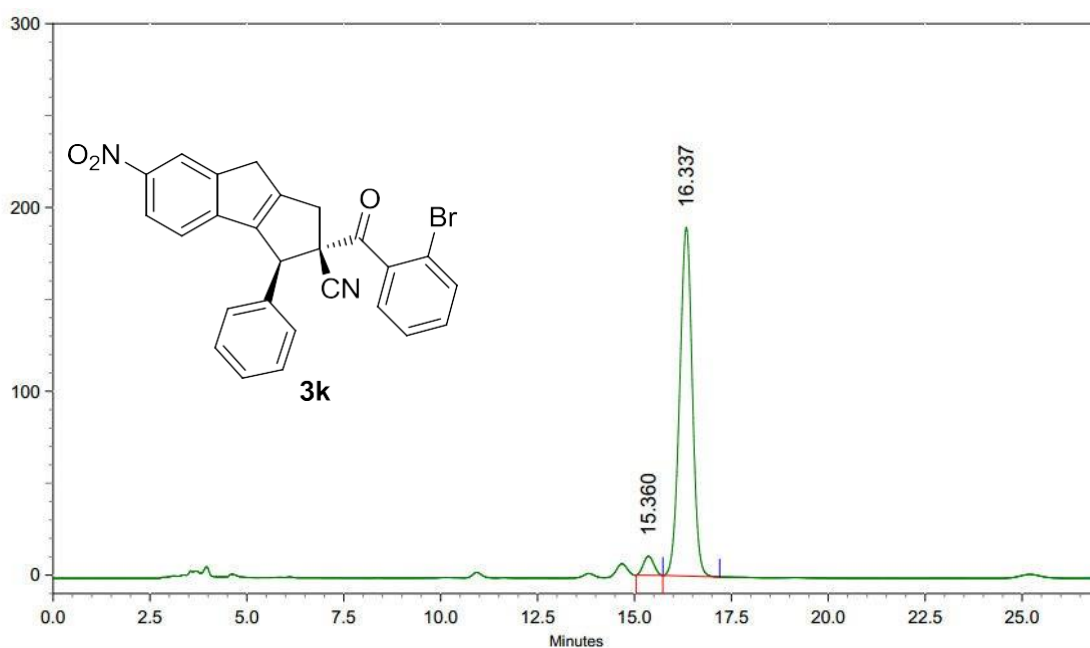

### AREA PERCENT REPORT

| Peak No. | Ret Time | Width | Height  | Area     | Area [%] |
|----------|----------|-------|---------|----------|----------|
| 1        | 15.360   | 0.693 | 173993  | 3270873  | 4.3318   |
| 2        | 16.337   | 1.470 | 3182051 | 72237483 | 95.6682  |

# Spectrum Plot Report

|                |                  |              |            |              |                                  |
|----------------|------------------|--------------|------------|--------------|----------------------------------|
| Name           | CYC-20191124-4   | Rack Pos.    | Instrument | Instrument 1 | Operator                         |
| Inj. Vol. (ul) | 10               | Plate Pos.   | IRM Status | Success      |                                  |
| Data File      | CYC-20191124-4.d | Method (Acq) | Comment    |              | Acq. Time (Local)                |
|                |                  |              |            |              | 12/5/2019 4:42:18 PM (UTC+08:00) |

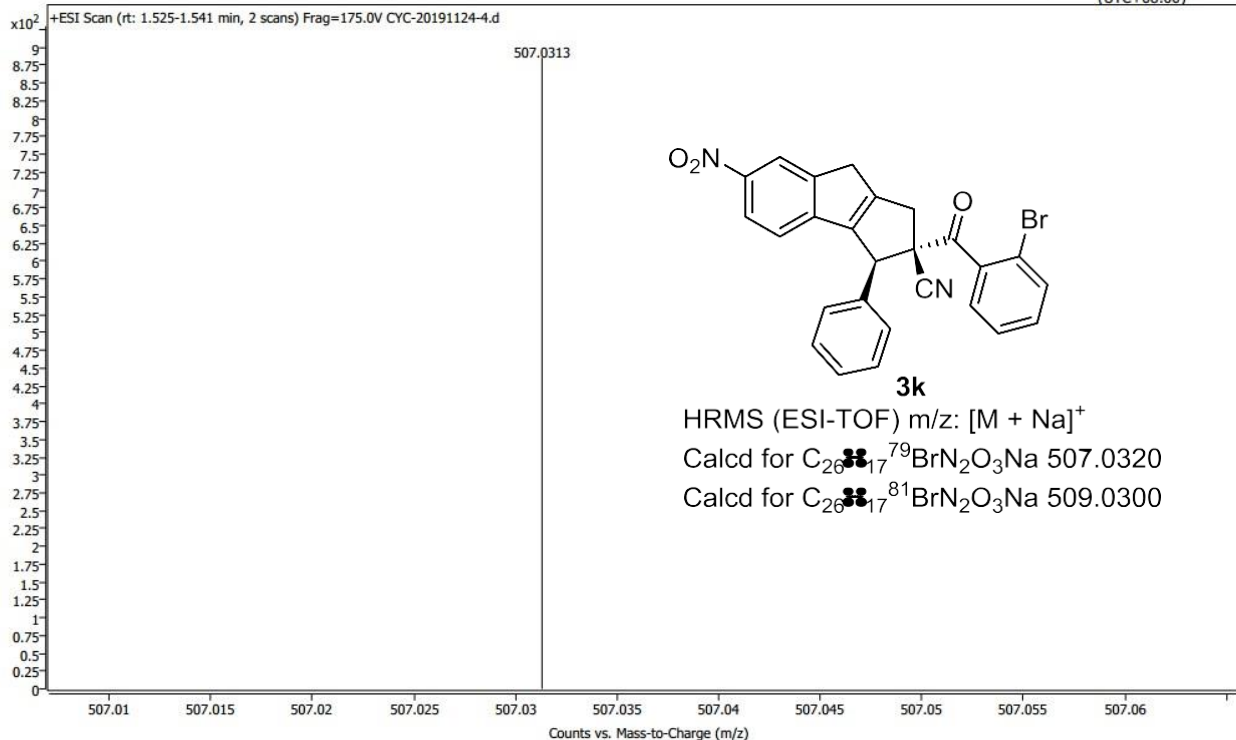

# Spectrum Plot Report

|                |                  |              |            |              |                                  |
|----------------|------------------|--------------|------------|--------------|----------------------------------|
| Name           | CYC-20191124-4   | Rack Pos.    | Instrument | Instrument 1 | Operator                         |
| Inj. Vol. (ul) | 10               | Plate Pos.   | IRM Status | Success      |                                  |
| Data File      | CYC-20191124-4.d | Method (Acq) | Comment    |              | Acq. Time (Local)                |
|                |                  |              |            |              | 12/5/2019 4:42:18 PM (UTC+08:00) |

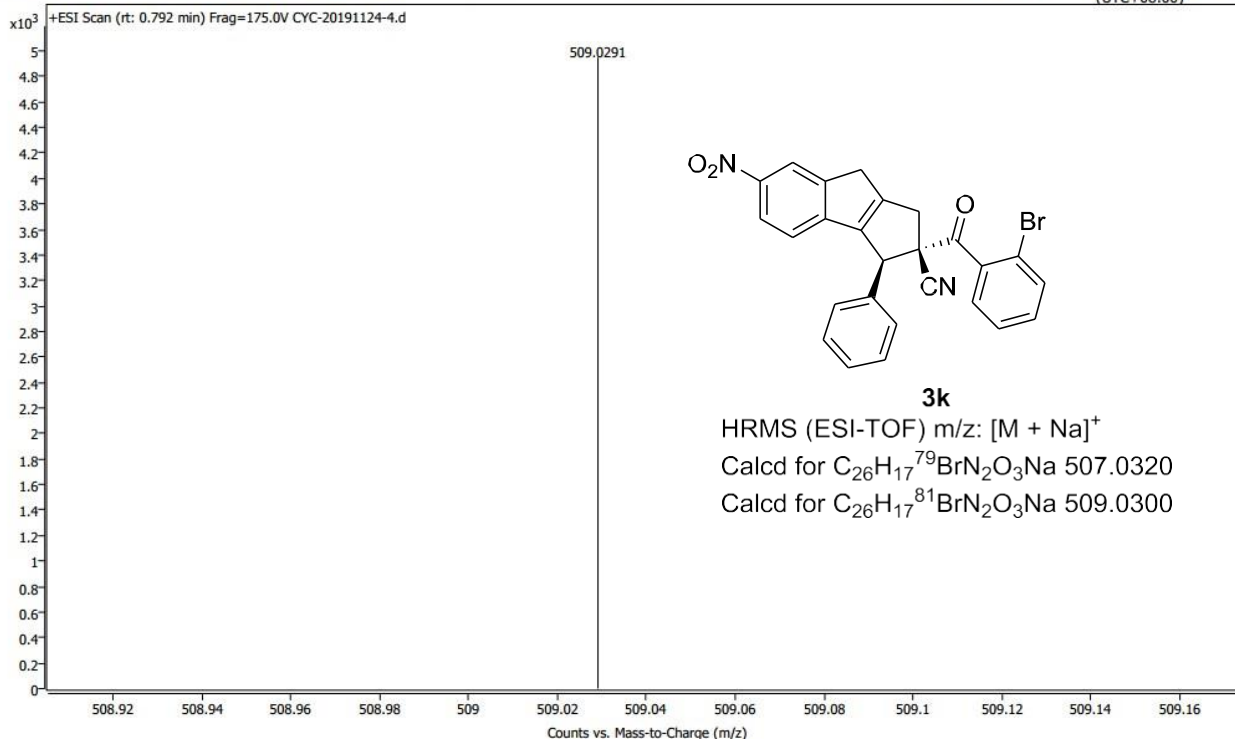

8.273, 8.255, 8.237, 8.232, 8.227, 8.081, 8.040, 8.035, 8.019, 7.795, 7.792, 7.788, 7.774, 7.757, 7.441, 7.437, 7.429, 7.422, 7.415, 7.412, 7.311, 7.302, 7.305, 7.298, 7.285, 7.281, 6.813, 6.792, -5.113, 3.888, 3.715, 3.699, 3.694, 3.682, 3.671, 3.653, 3.621, 3.602, 3.495, 3.486

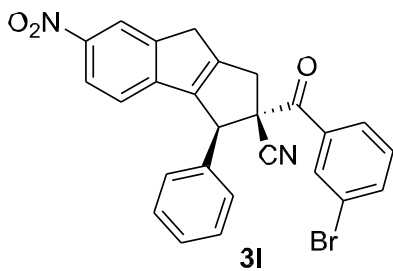

$^1\text{H}$  NMR (400 MHz,  $\text{CDCl}_3$ )

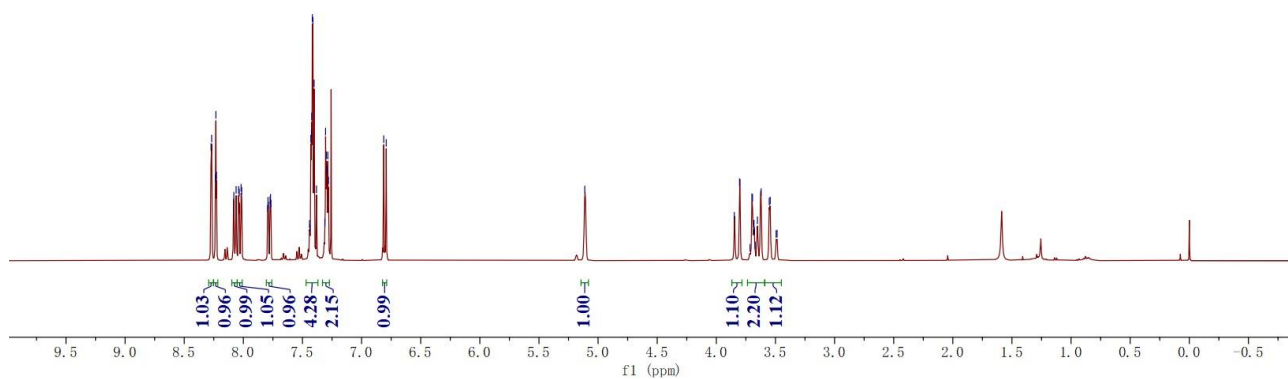

189.486, 153.207, 148.335, 146.054, 145.602, 145.576, 137.270, 135.619, 134.489, 133.020, 132.616, 129.216, 129.067, 128.351, 123.307, 119.506, 119.207, 62.517, 53.900, 41.622, 35.754

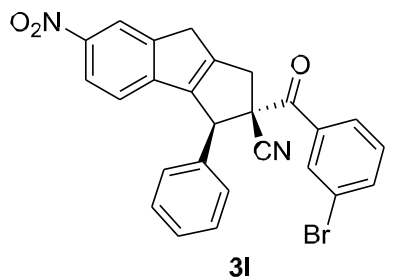

$^{13}\text{C}$  NMR (100 MHz,  $\text{CDCl}_3$ )

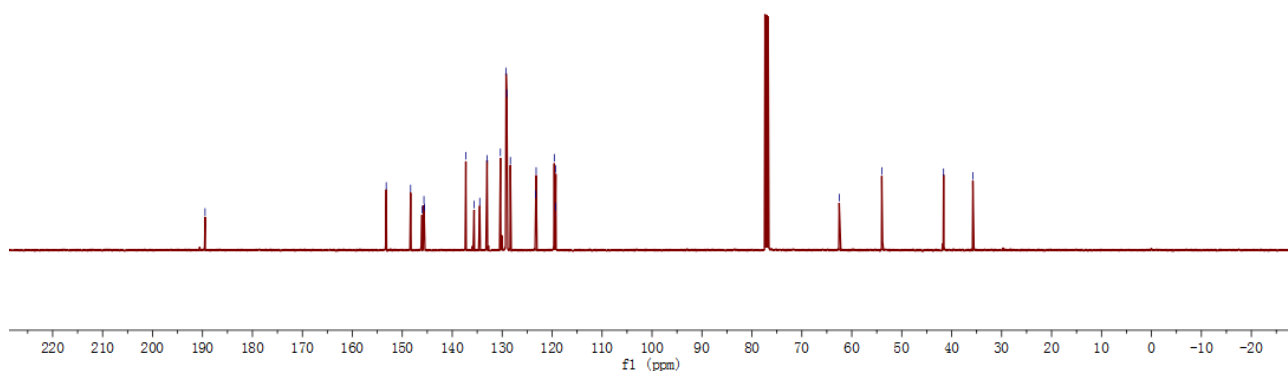

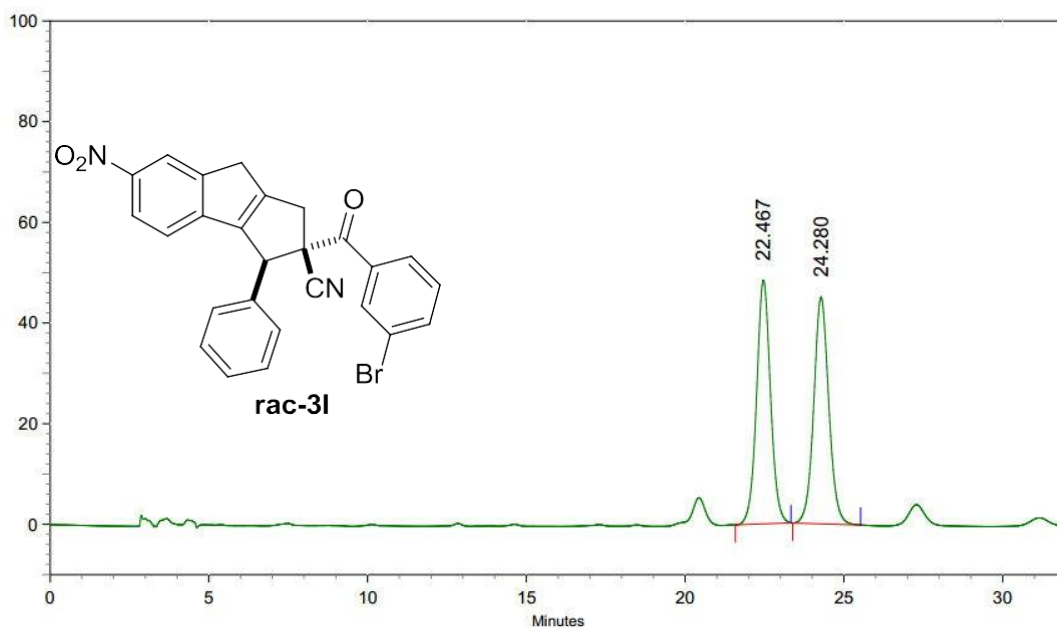

### AREA PERCENT REPORT

| Peak No. | Ret Time | Width | Height | Area     | Area [%] |
|----------|----------|-------|--------|----------|----------|
| 1        | 22.467   | 1.753 | 812614 | 24766805 | 49.8434  |
| 2        | 24.280   | 2.143 | 755892 | 24922454 | 50.1566  |

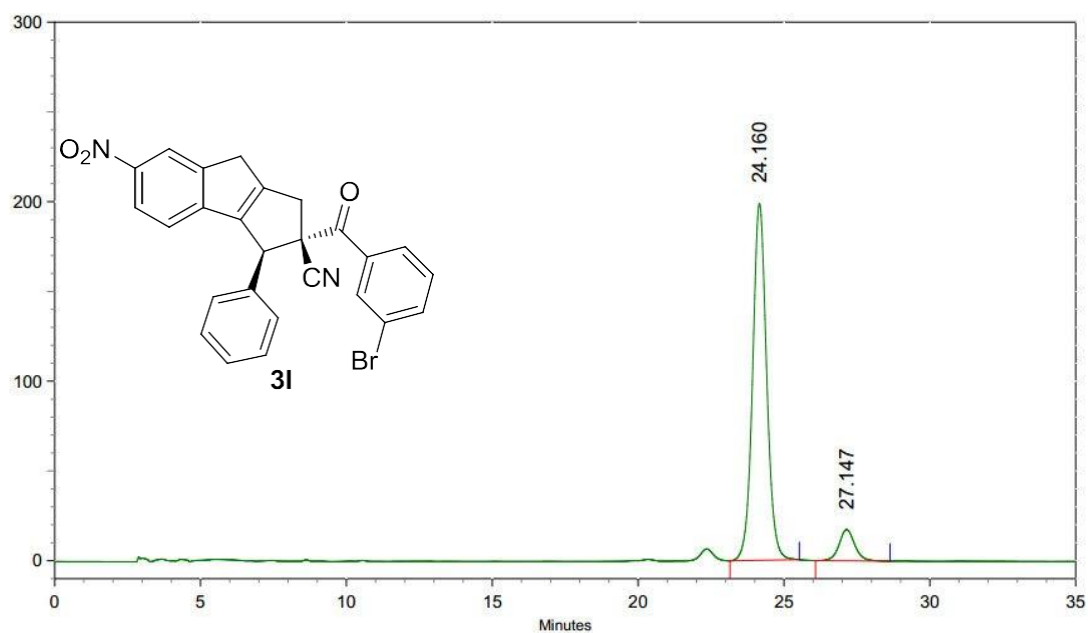

### AREA PERCENT REPORT

| Peak No. | Ret Time | Width | Height  | Area      | Area [%] |
|----------|----------|-------|---------|-----------|----------|
| 1        | 24.160   | 2.377 | 3335325 | 111500414 | 91.0943  |
| 2        | 27.147   | 2.557 | 292741  | 10900693  | 8.9057   |

# Spectrum Plot Report

|                |                   |              |            |              |                                   |
|----------------|-------------------|--------------|------------|--------------|-----------------------------------|
| Name           | CYC-20191103-11   | Rack Pos.    | Instrument | Instrument 1 | Operator                          |
| Inj. Vol. (ul) | 10                | Plate Pos.   | IRM Status | Success      |                                   |
| Data File      | CYC-20191103-11.d | Method (Acq) | TOF.m      |              | Acq. Time (Local)                 |
|                |                   |              |            |              | 11/8/2019 10:50:35 AM (UTC+08:00) |

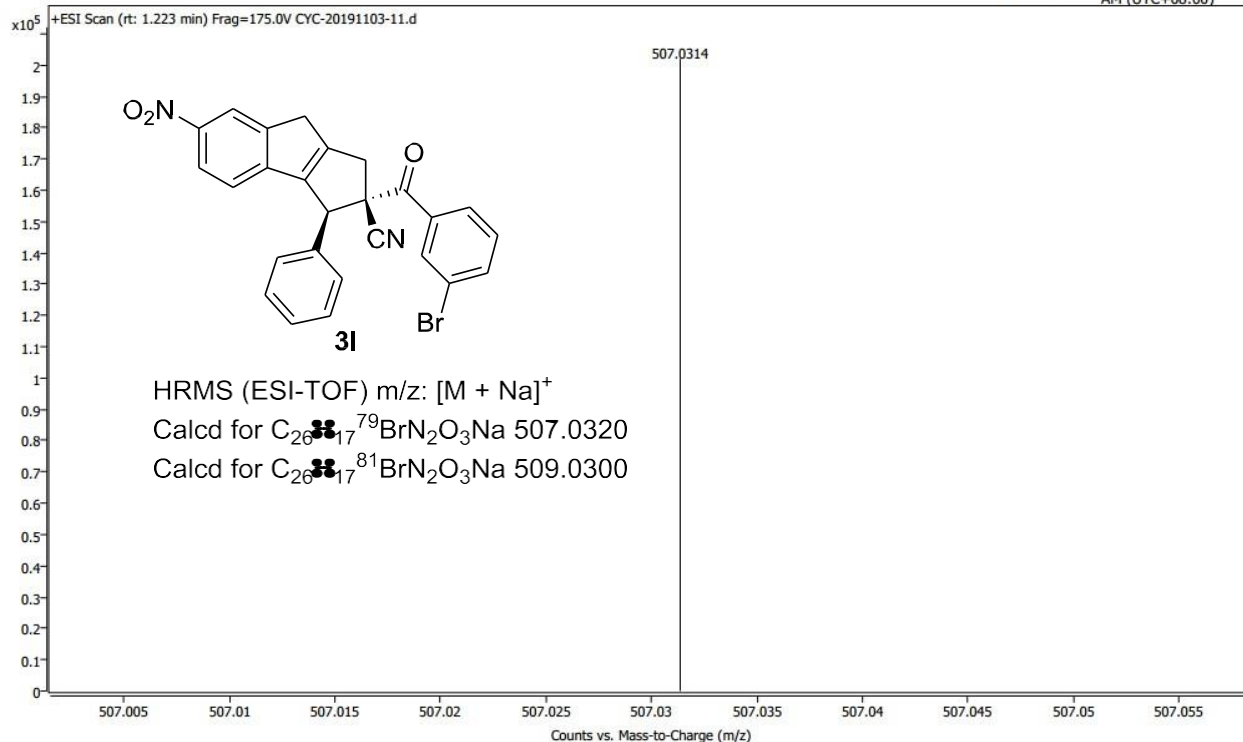

# Spectrum Plot Report

|                |                   |              |            |              |                                   |
|----------------|-------------------|--------------|------------|--------------|-----------------------------------|
| Name           | CYC-20191103-11   | Rack Pos.    | Instrument | Instrument 1 | Operator                          |
| Inj. Vol. (ul) | 10                | Plate Pos.   | IRM Status | Success      |                                   |
| Data File      | CYC-20191103-11.d | Method (Acq) | TOF.m      |              | Acq. Time (Local)                 |
|                |                   |              |            |              | 11/8/2019 10:50:35 AM (UTC+08:00) |

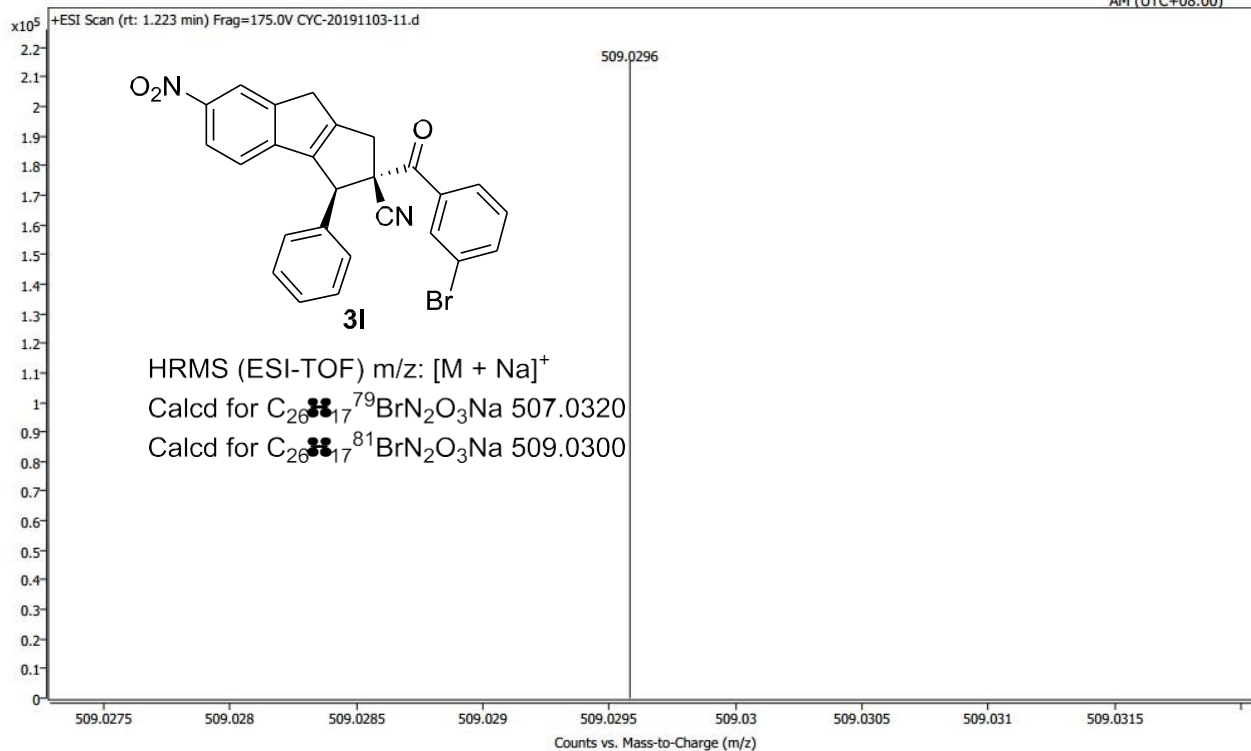

8.271  
8.265  
8.095  
8.090  
8.085  
8.073  
8.061  
8.039  
8.034  
8.019  
8.013  
7.916  
7.909  
7.904  
7.897  
7.881  
7.823  
7.818  
7.805  
7.799  
7.792  
7.784  
7.779  
6.812  
6.792

5.120

3.826  
3.822  
3.808  
3.805  
3.878  
3.851  
3.845  
3.839  
3.881

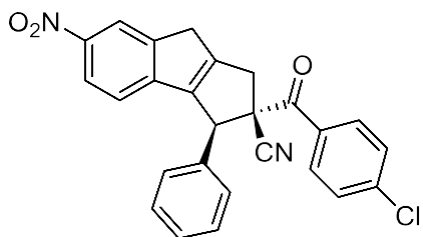

<sup>1</sup>H NMR (400 MHz, CDCl<sub>3</sub>)

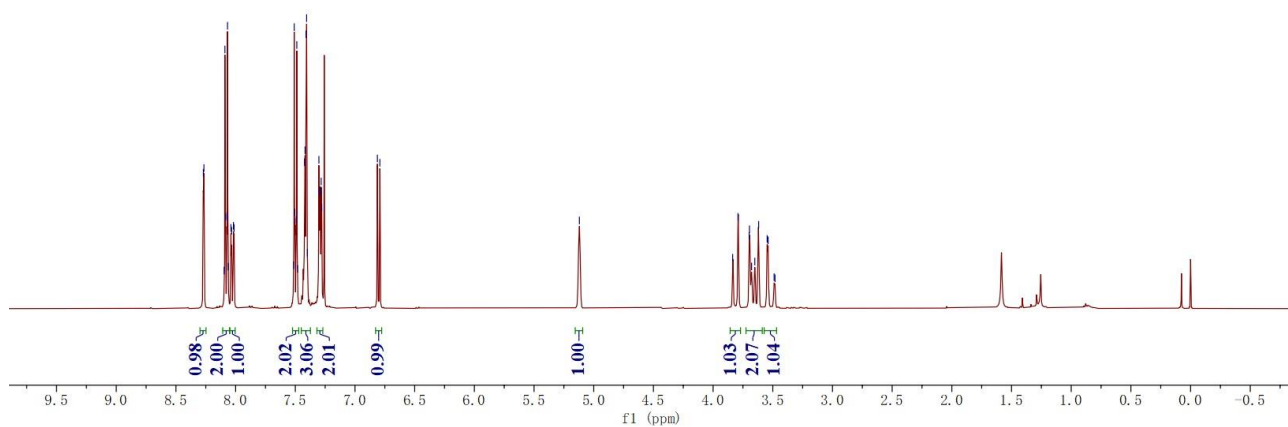

189.494

153.198  
148.335  
146.127  
146.094  
145.822  
141.883  
138.738  
131.482  
130.996  
129.296  
129.195  
128.059  
128.055  
127.852  
119.527  
119.253

62.368

53.951

41.725

35.746

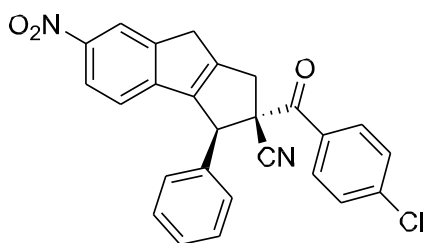

<sup>13</sup>C NMR (100 MHz, CDCl<sub>3</sub>)

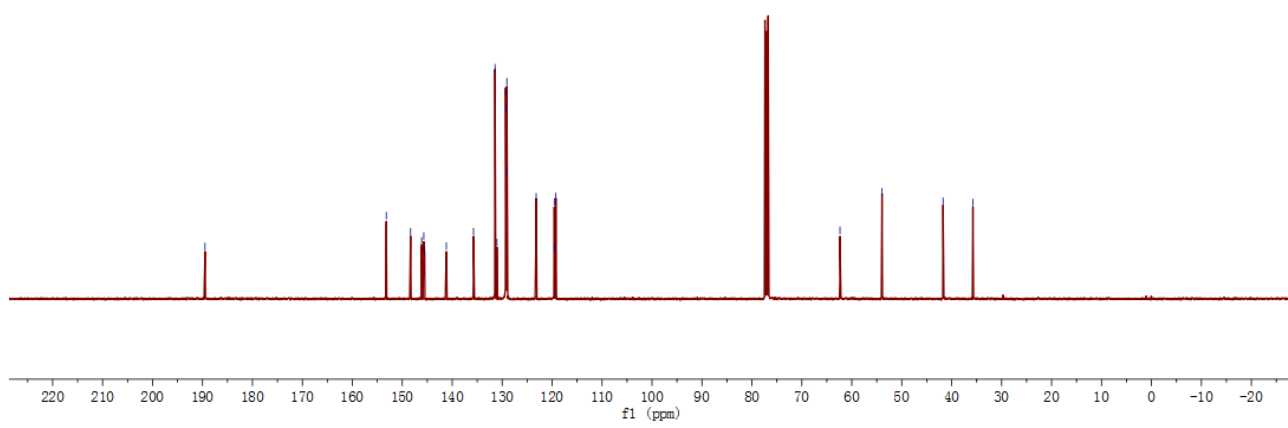



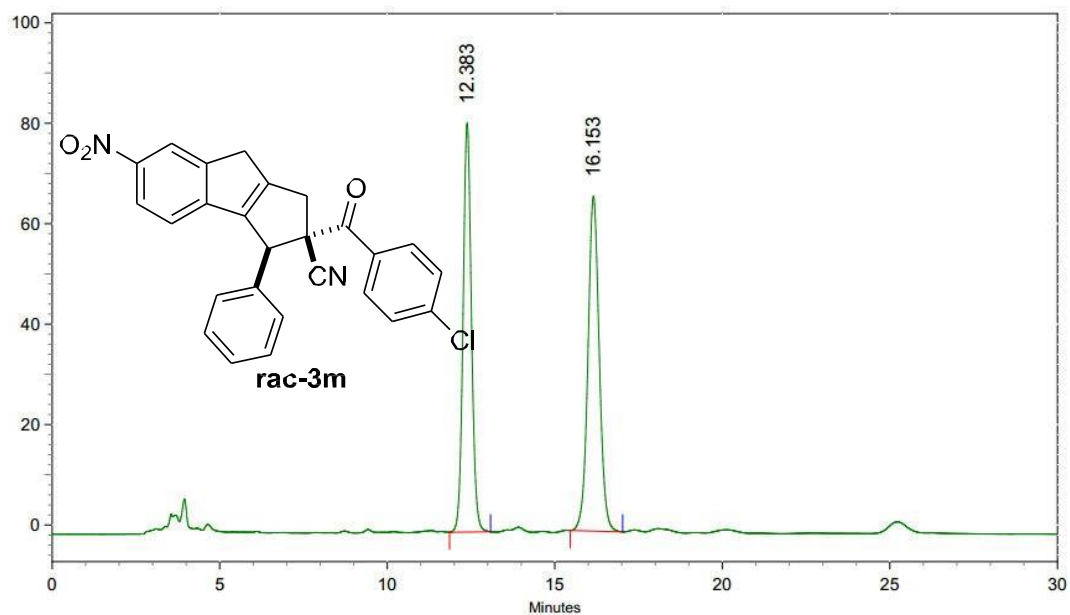

**AREA PERCENT REPORT**

| Peak No. | Ret Time | Width | Height  | Area     | Area [%] |
|----------|----------|-------|---------|----------|----------|
| 1        | 12.383   | 1.223 | 1366179 | 23725204 | 47.5559  |
| 2        | 16.153   | 1.567 | 1118453 | 26163836 | 52.4441  |

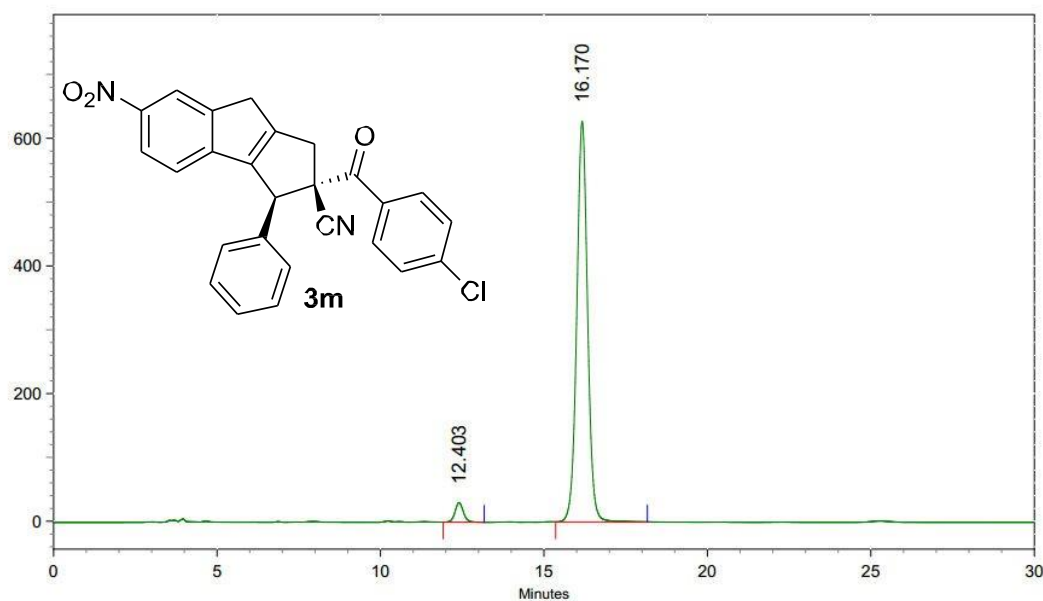

**AREA PERCENT REPORT**

| Peak No. | Ret Time | Width | Height   | Area      | Area [%] |
|----------|----------|-------|----------|-----------|----------|
| 1        | 12.403   | 1.257 | 514824   | 9090498   | 3.6274   |
| 2        | 16.170   | 2.803 | 10529019 | 241519212 | 96.3727  |

# Spectrum Plot Report

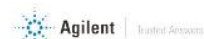

|                |                  |              |            |              |                                   |
|----------------|------------------|--------------|------------|--------------|-----------------------------------|
| Name           | CYC-20191103-6   | Rack Pos.    | Instrument | Instrument 1 | Operator                          |
| Inj. Vol. (ul) | 10               | Plate Pos.   | IRM Status | Success      |                                   |
| Data File      | CYC-20191103-6.d | Method (Acq) | TOF.m      | Comment      | Acq. Time (Local)                 |
|                |                  |              |            |              | 11/8/2019 10:35:35 AM (UTC+08:00) |

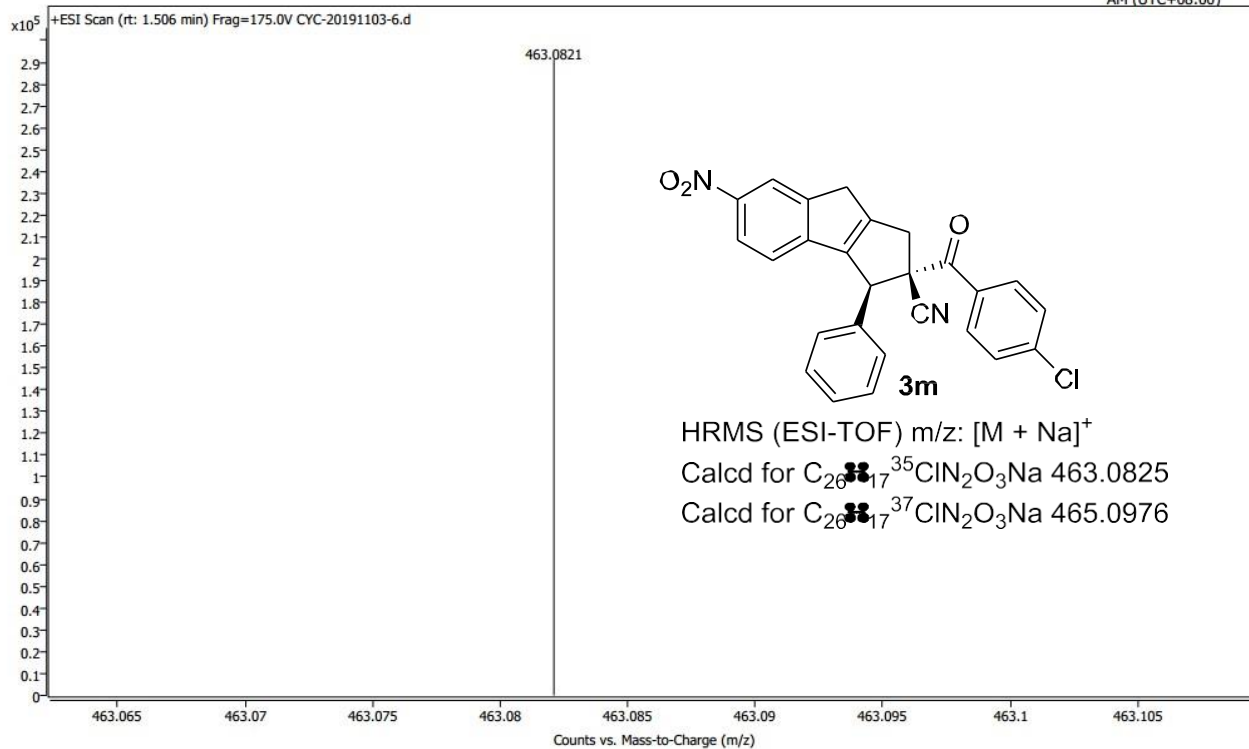

# Spectrum Plot Report

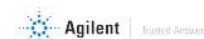

|                |                  |              |            |              |                                   |
|----------------|------------------|--------------|------------|--------------|-----------------------------------|
| Name           | CYC-20191103-6   | Rack Pos.    | Instrument | Instrument 1 | Operator                          |
| Inj. Vol. (ul) | 10               | Plate Pos.   | IRM Status | Success      |                                   |
| Data File      | CYC-20191103-6.d | Method (Acq) | TOF.m      | Comment      | Acq. Time (Local)                 |
|                |                  |              |            |              | 11/8/2019 10:35:35 AM (UTC+08:00) |

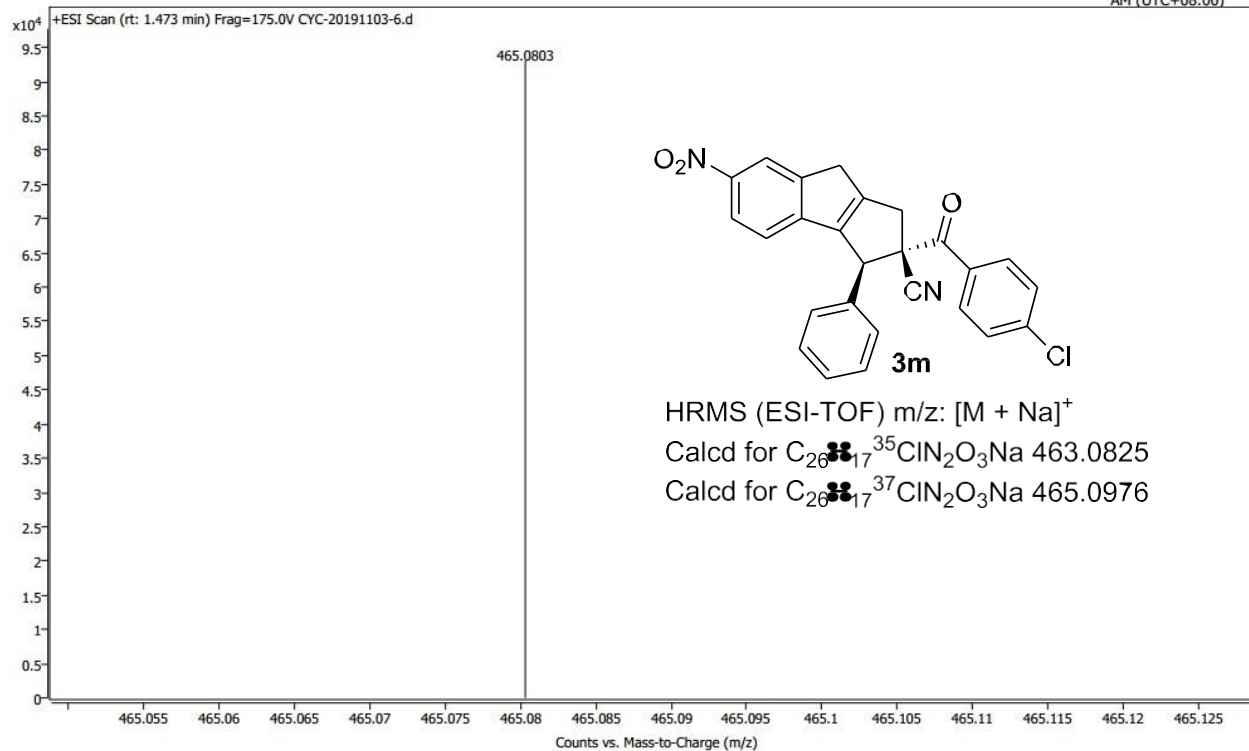

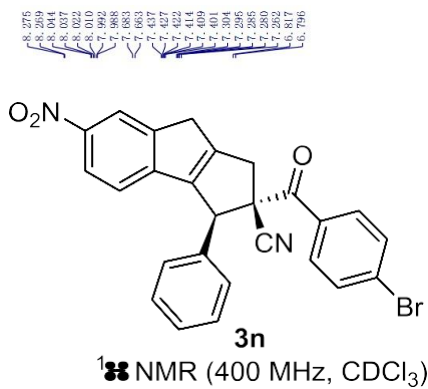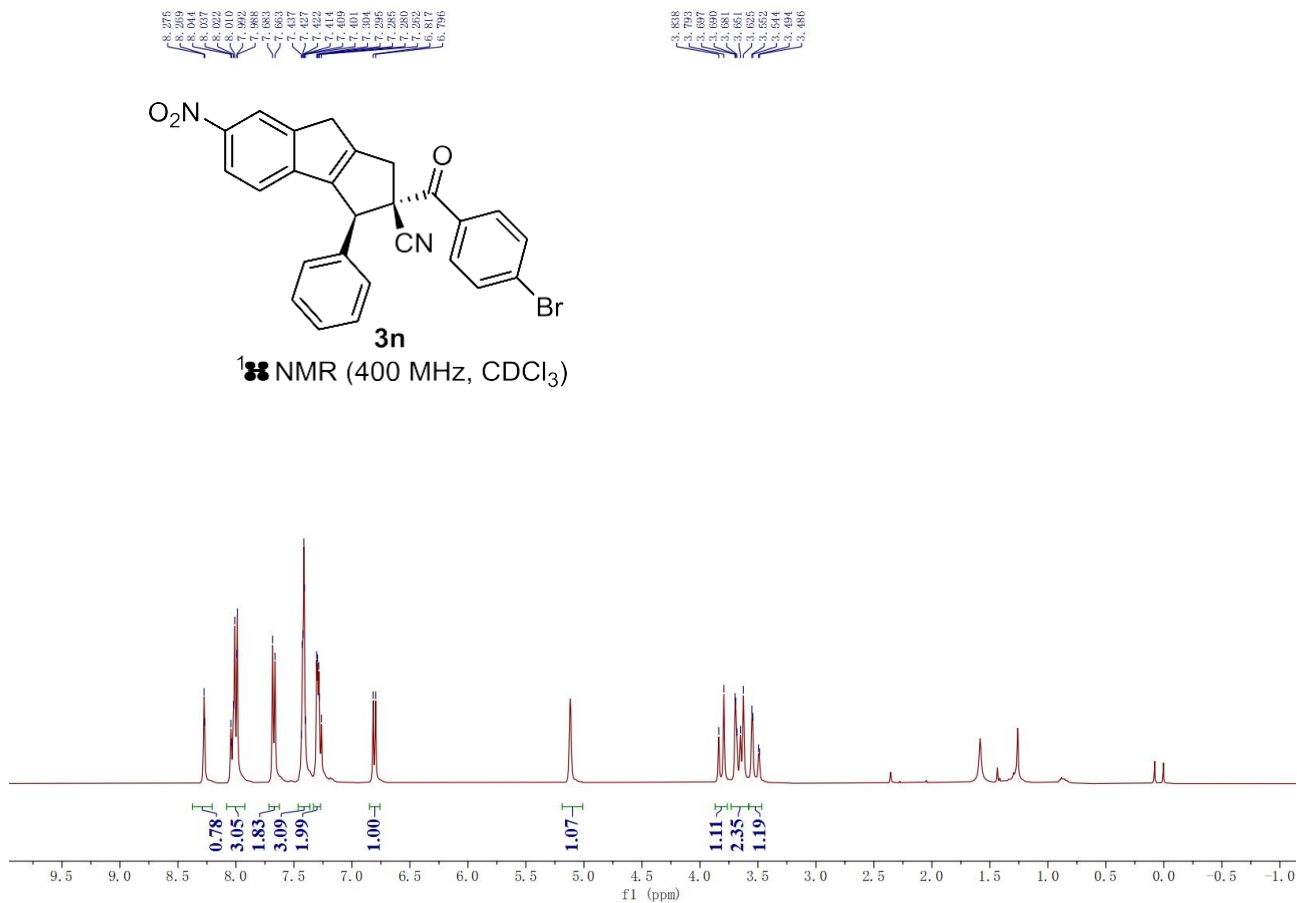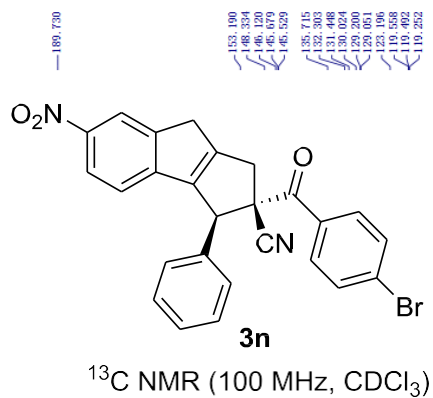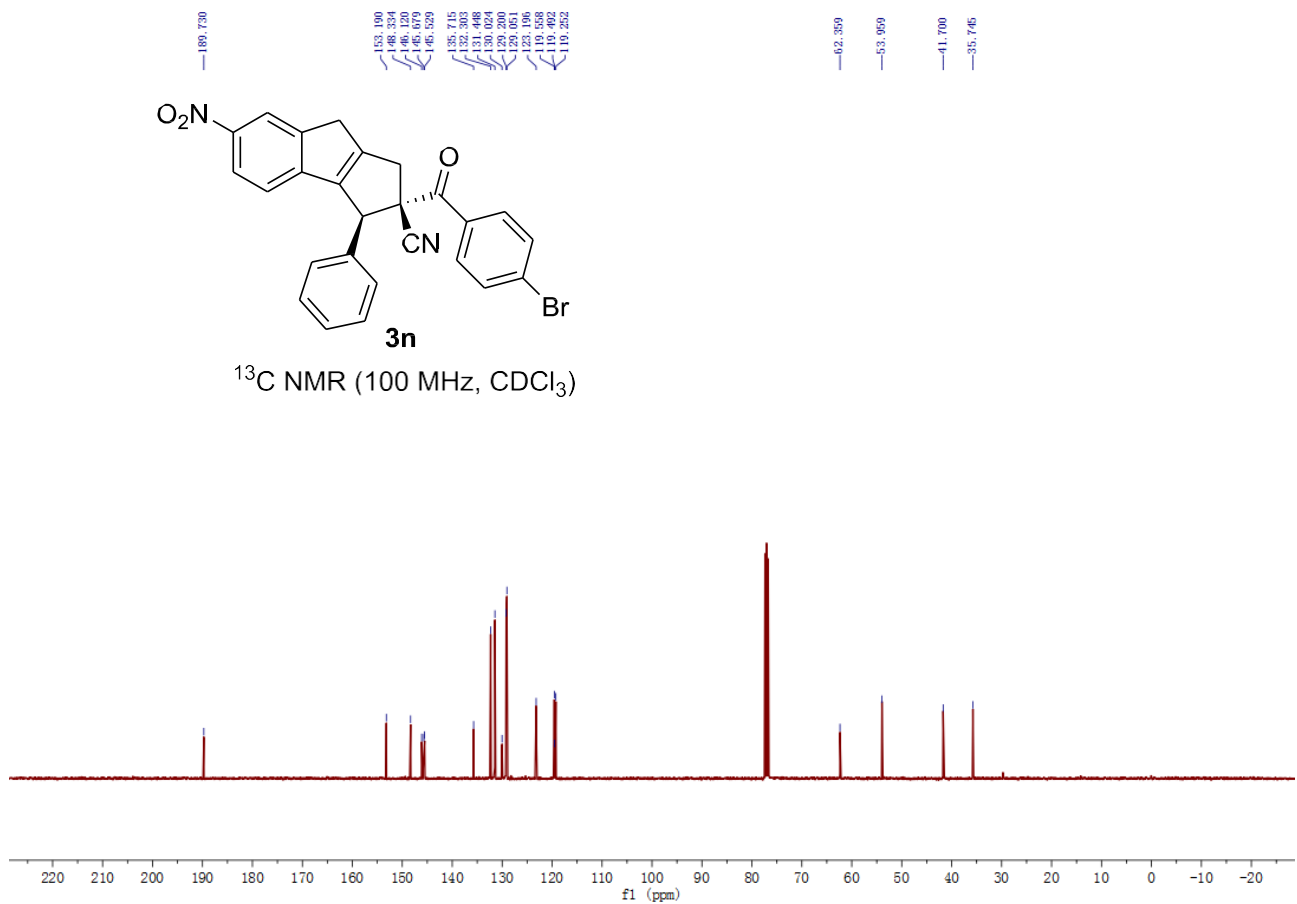

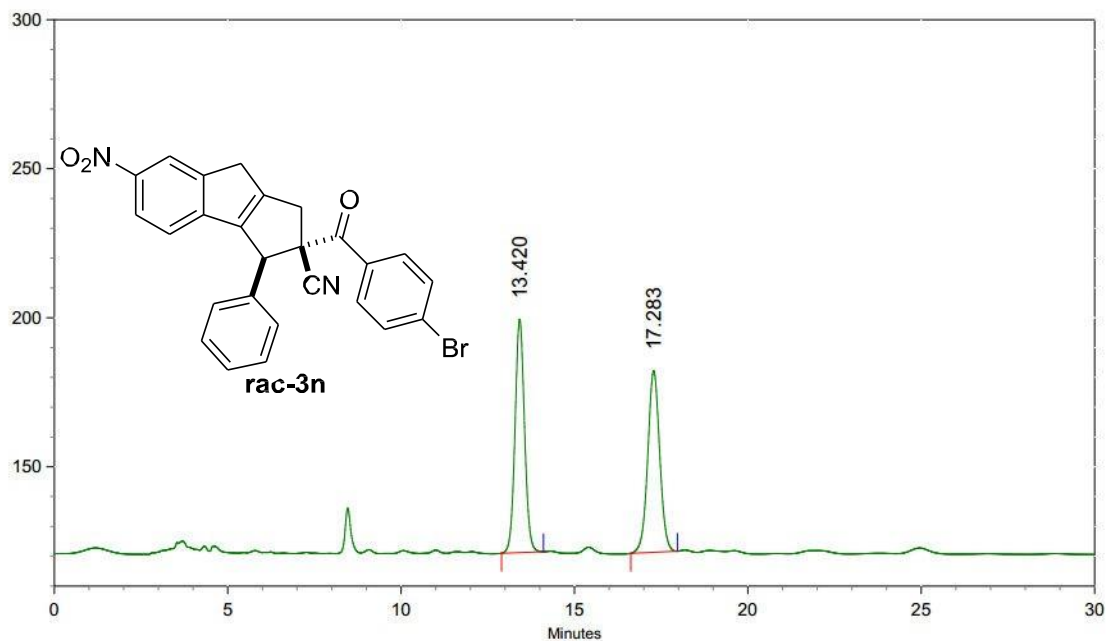

### AREA PERCENT REPORT

| Peak No. | Ret Time | Width | Height  | Area     | Area [%] |
|----------|----------|-------|---------|----------|----------|
| 1        | 13.420   | 1.210 | 1313502 | 25019512 | 50.4931  |
| 2        | 17.283   | 1.343 | 1022344 | 24530872 | 49.5069  |

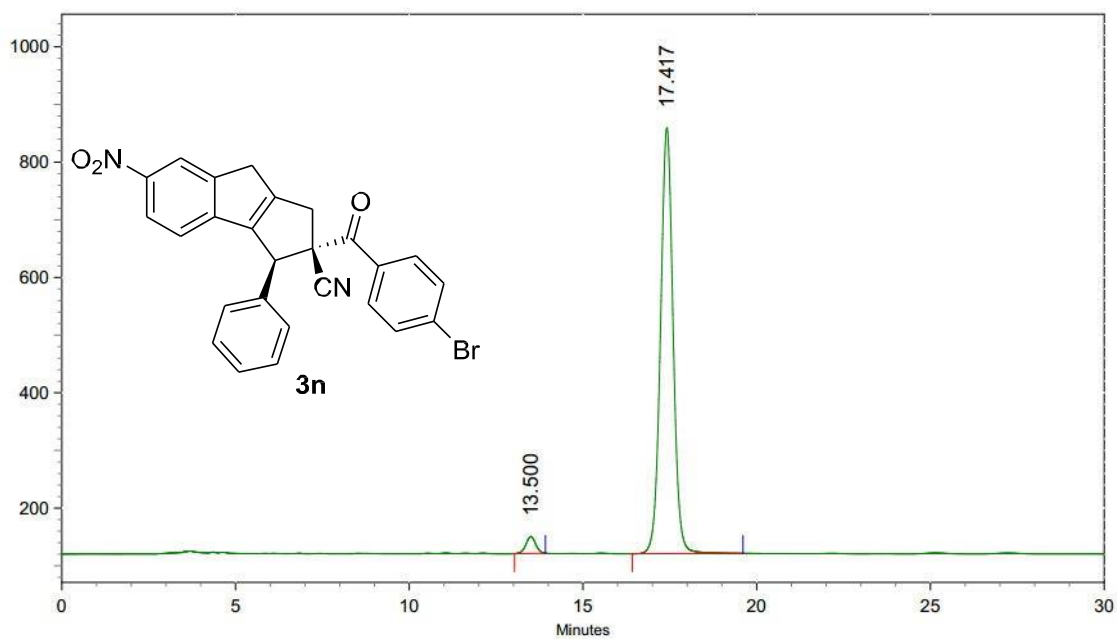

### AREA PERCENT REPORT

| Peak No. | Ret Time | Width | Height   | Area      | Area [%] |
|----------|----------|-------|----------|-----------|----------|
| 1        | 13.500   | 0.887 | 490356   | 9592131   | 2.9857   |
| 2        | 17.417   | 3.183 | 12390634 | 311678228 | 97.0143  |

# Spectrum Plot Report

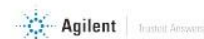

|                |                   |              |            |                   |                                   |
|----------------|-------------------|--------------|------------|-------------------|-----------------------------------|
| Name           | CYC-20191103-10   | Rack Pos.    | Instrument | Instrument 1      | Operator                          |
| Inj. Vol. (ul) | 10                | Plate Pos.   | IRM Status | Success           |                                   |
| Data File      | CYC-20191103-10.d | Method (Acq) | TOF.m      | Acq. Time (Local) | 11/8/2019 10:47:34 AM (UTC+08:00) |

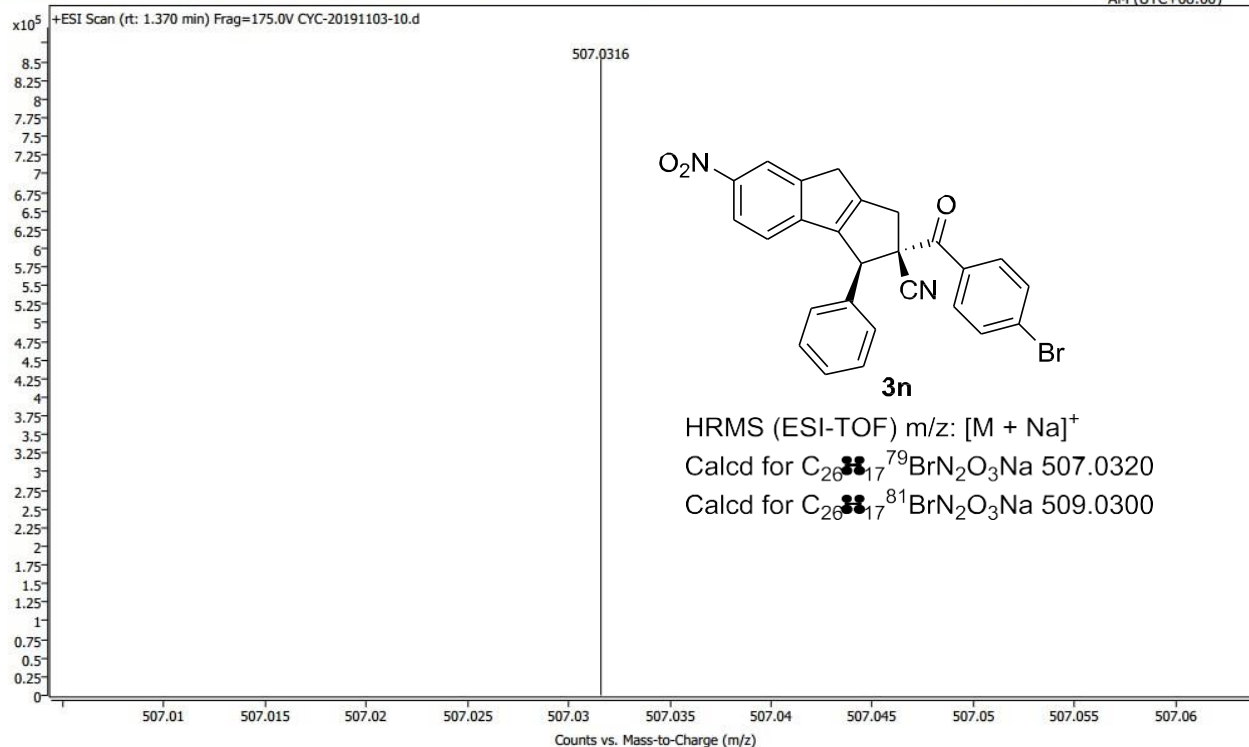

# Spectrum Plot Report

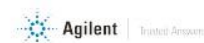

|                |                   |              |            |                   |                                   |
|----------------|-------------------|--------------|------------|-------------------|-----------------------------------|
| Name           | CYC-20191103-10   | Rack Pos.    | Instrument | Instrument 1      | Operator                          |
| Inj. Vol. (ul) | 10                | Plate Pos.   | IRM Status | Success           |                                   |
| Data File      | CYC-20191103-10.d | Method (Acq) | TOF.m      | Acq. Time (Local) | 11/8/2019 10:47:34 AM (UTC+08:00) |

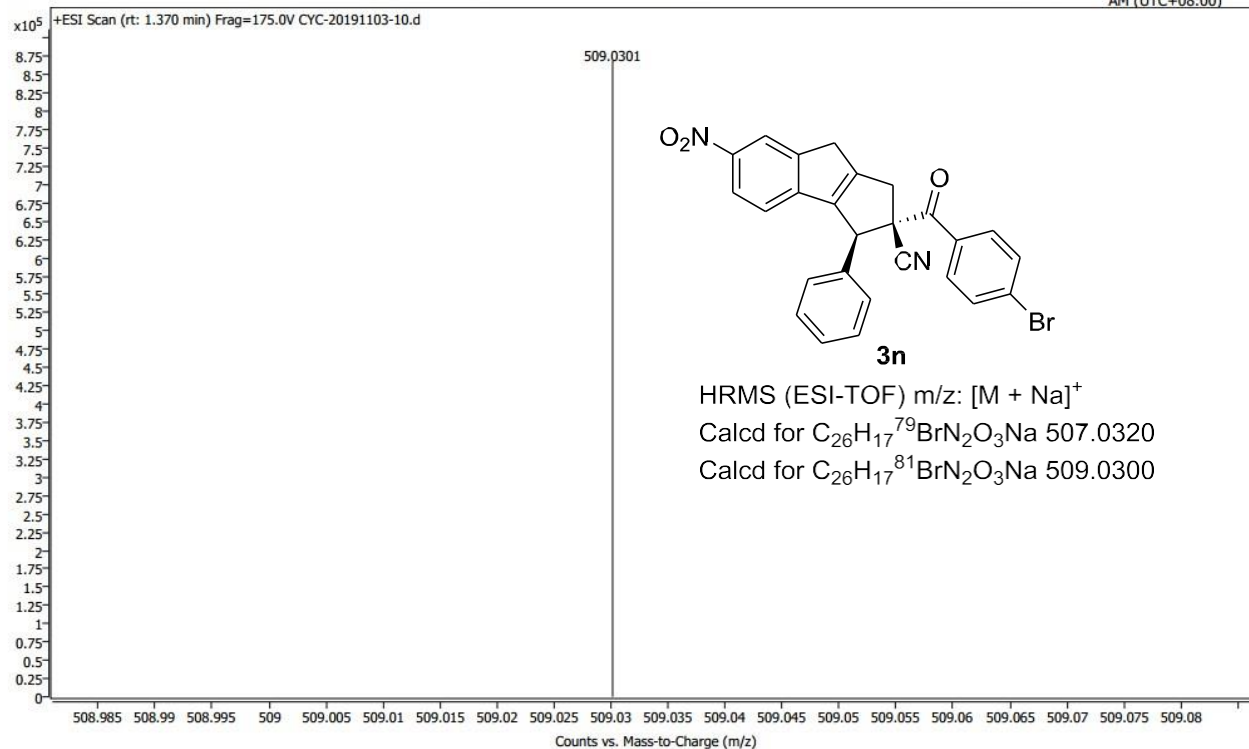

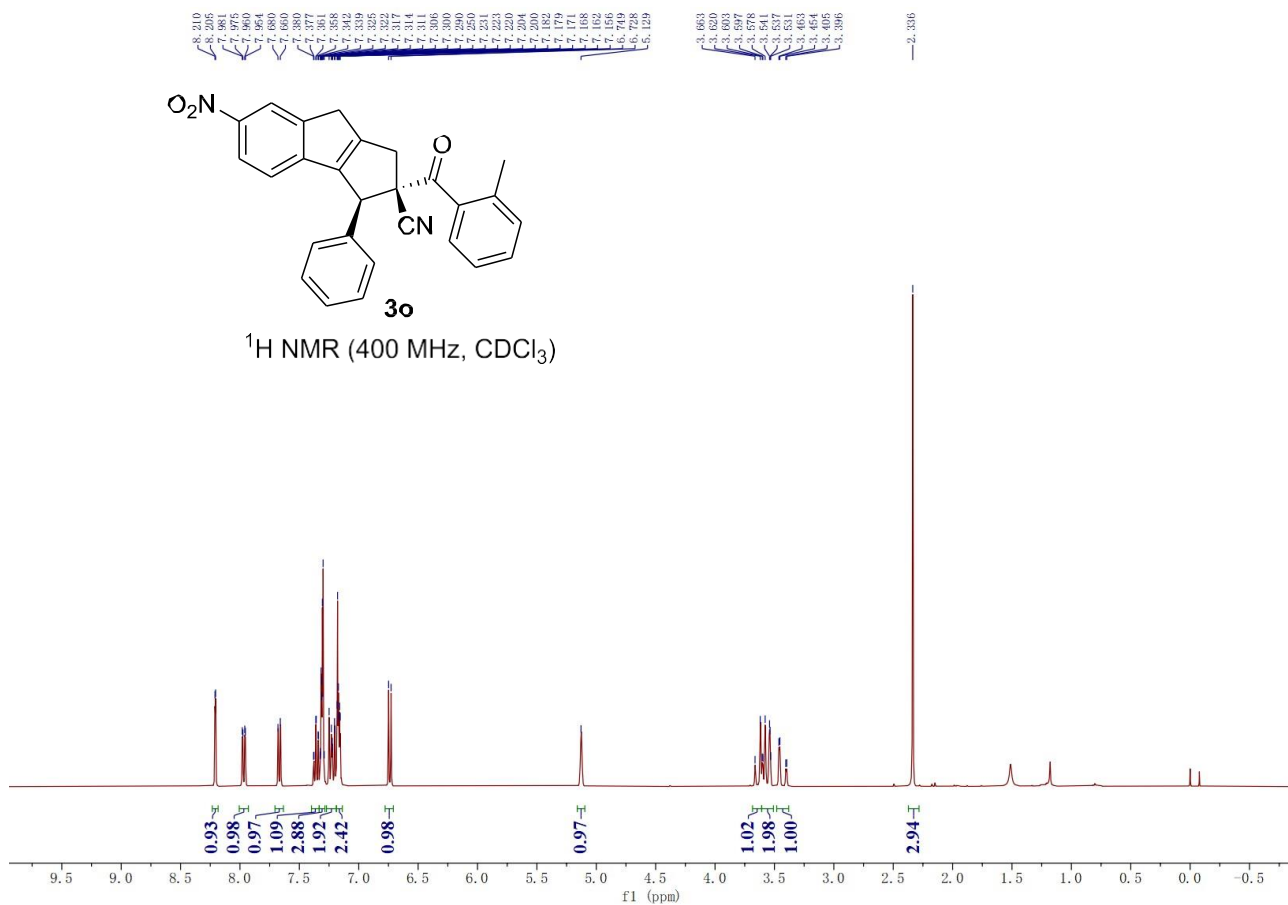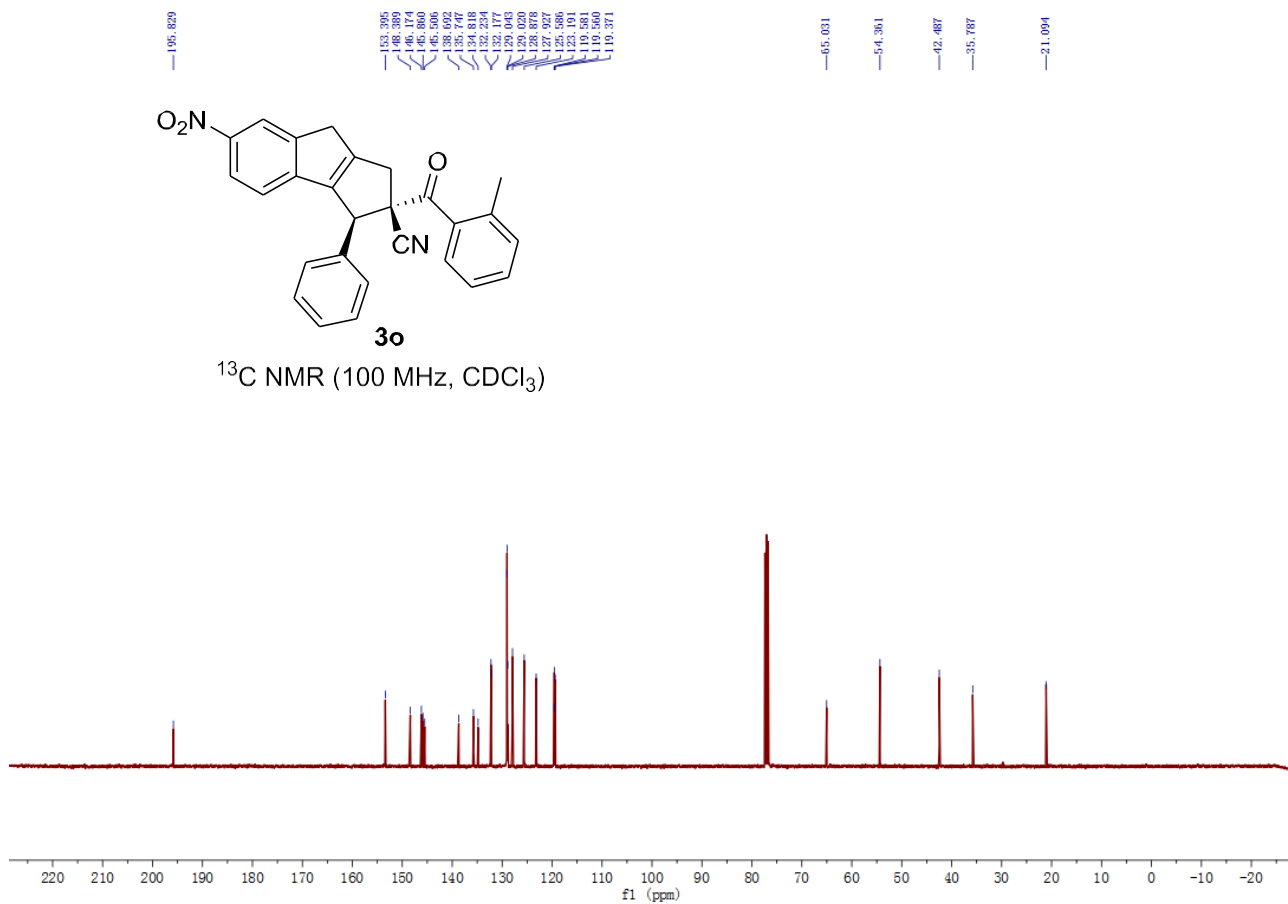

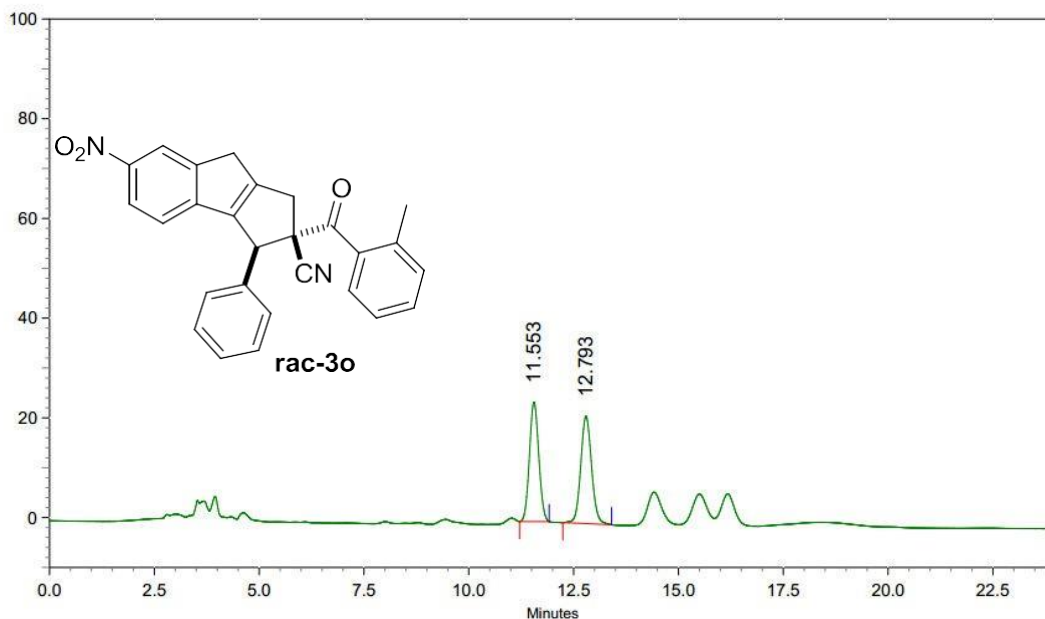

### AREA PERCENT REPORT

| Peak No. | Ret Time | Width | Height | Area    | Area [%] |
|----------|----------|-------|--------|---------|----------|
| 1        | 11.553   | 0.707 | 402004 | 6228146 | 48.9014  |
| 2        | 12.793   | 1.163 | 361638 | 6507974 | 51.0986  |

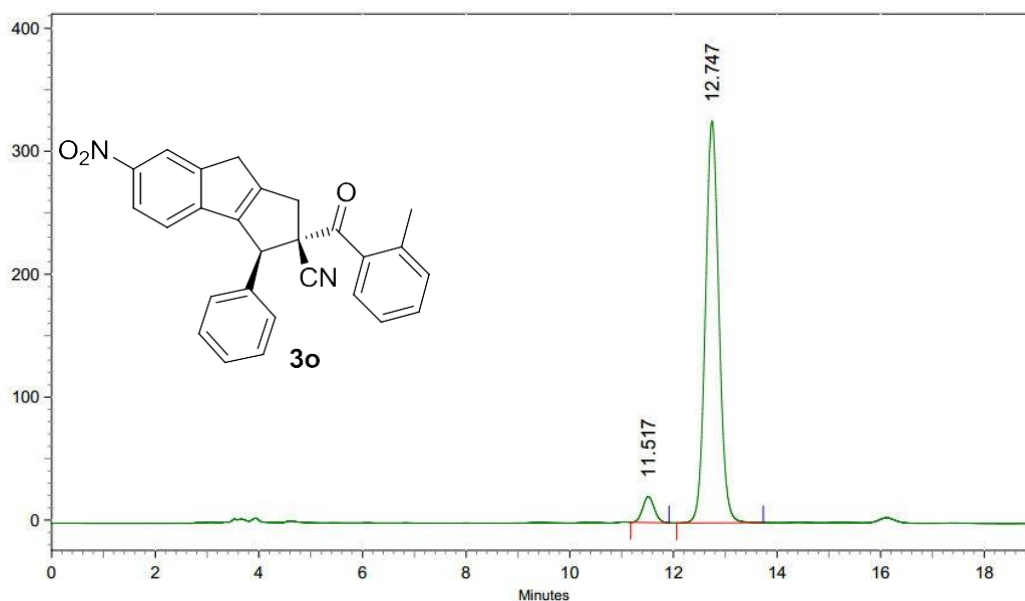

### AREA PERCENT REPORT

| Peak No. | Ret Time | Width | Height  | Area     | Area [%] |
|----------|----------|-------|---------|----------|----------|
| 1        | 11.517   | 0.740 | 354759  | 5524992  | 5.2765   |
| 2        | 12.747   | 1.670 | 5480554 | 99183875 | 94.7235  |

# Spectrum Plot Report

|                |                   |              |       |            |              |                   |                                   |
|----------------|-------------------|--------------|-------|------------|--------------|-------------------|-----------------------------------|
| Name           | CYC-20191018-63   | Rack Pos.    |       | Instrument | Instrument 1 | Operator          |                                   |
| Inj. Vol. (ul) | 10                | Plate Pos.   |       | IRM Status | Success      |                   |                                   |
| Data File      | CYC-20191018-63.d | Method (Acq) | TOF.m | Comment    |              | Acq. Time (Local) | 10/29/2019 4:04:25 PM (UTC+08:00) |

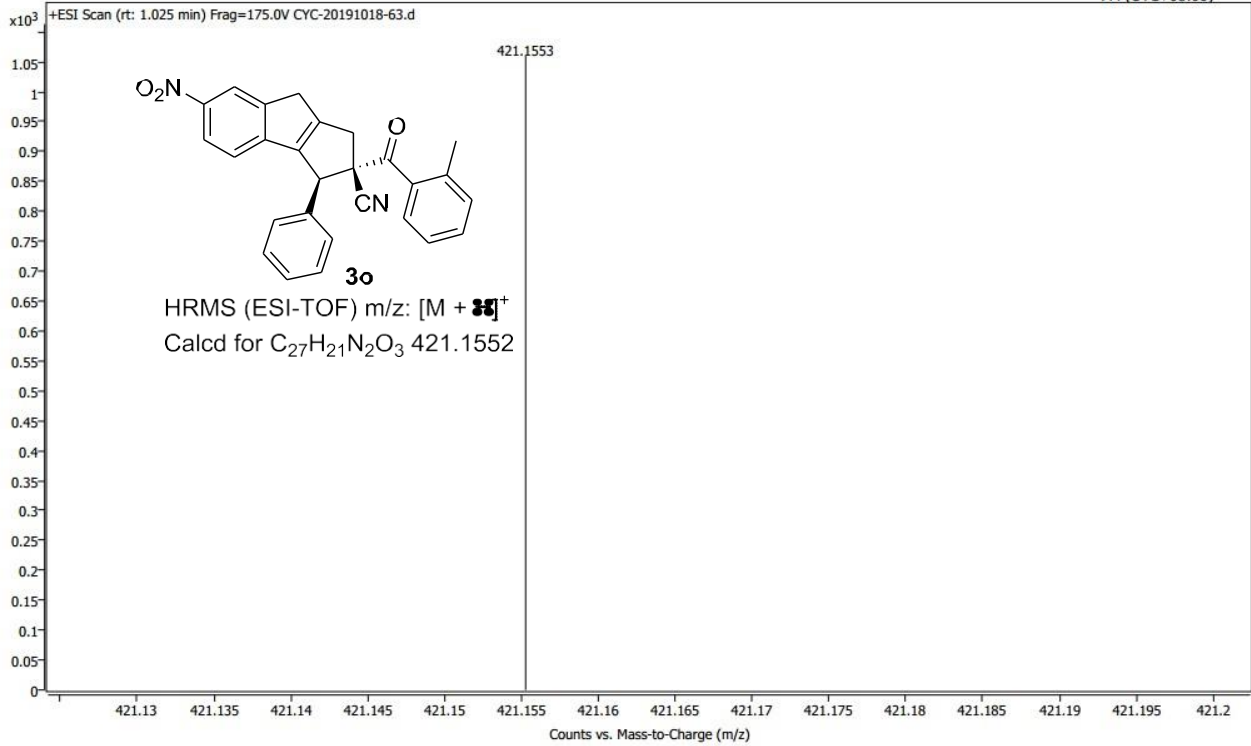



8.2282  
8.0365  
8.0304  
8.0299  
7.9887  
7.9411  
7.6755  
7.6709  
7.6331  
7.4233  
7.4199  
7.4155  
7.4141  
7.4094  
7.4009  
7.3933  
7.3885  
7.3882  
7.3165  
7.3165  
7.3088  
7.3088  
7.2995  
7.2991  
7.2911  
7.2911  
7.2877  
7.2877

— 5.142

3.8569  
3.8565  
3.844  
3.671  
3.669  
3.665  
3.543  
3.535  
3.485  
3.477

— 2.418

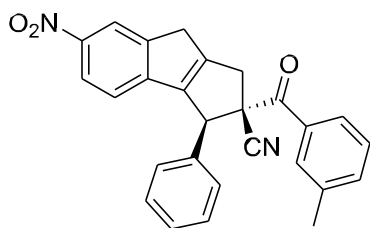

**3p**

<sup>1</sup>H NMR (400 MHz, CDCl<sub>3</sub>)

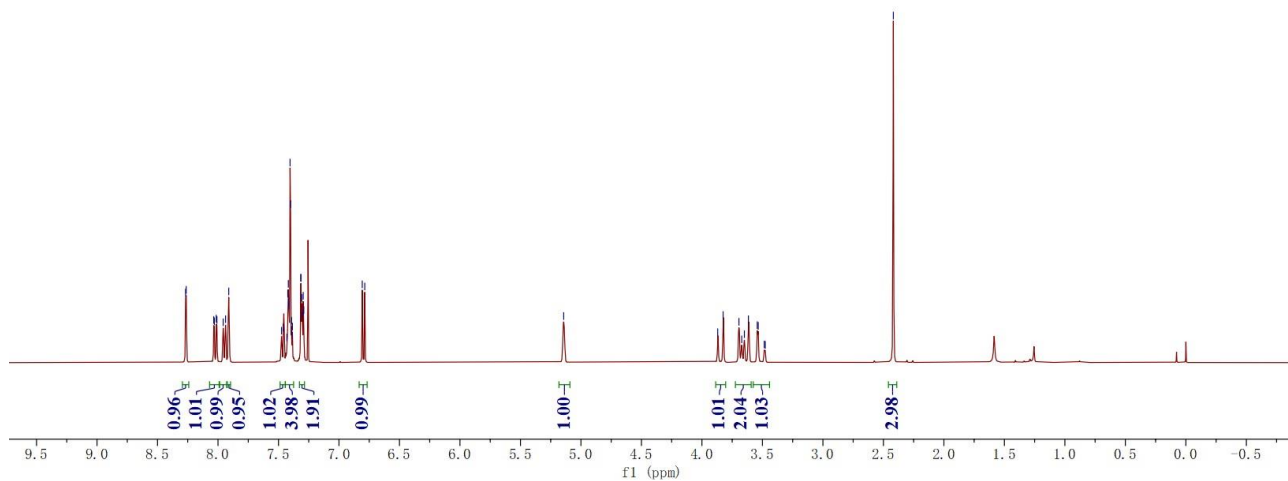

190.753

152.489  
148.350  
146.165  
146.887  
146.468  
146.862  
135.907  
135.211  
132.760  
130.674  
129.929  
129.090  
128.895  
128.728  
127.187  
123.627  
119.521  
119.204

62.468

53.990

41.759

35.751

21.428

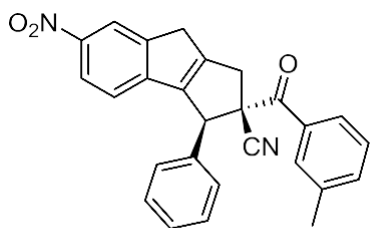

**3p**

<sup>13</sup>C NMR (100 MHz, CDCl<sub>3</sub>)

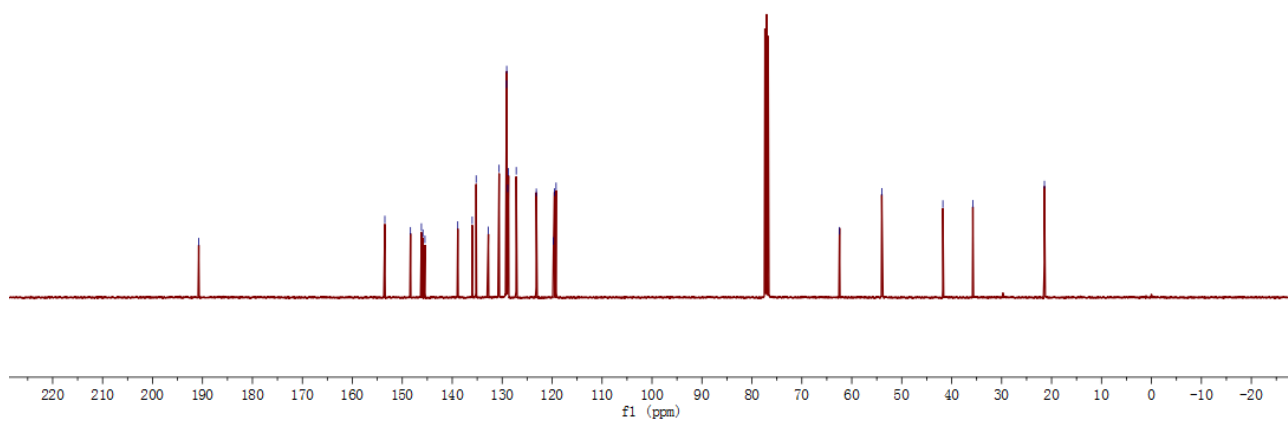

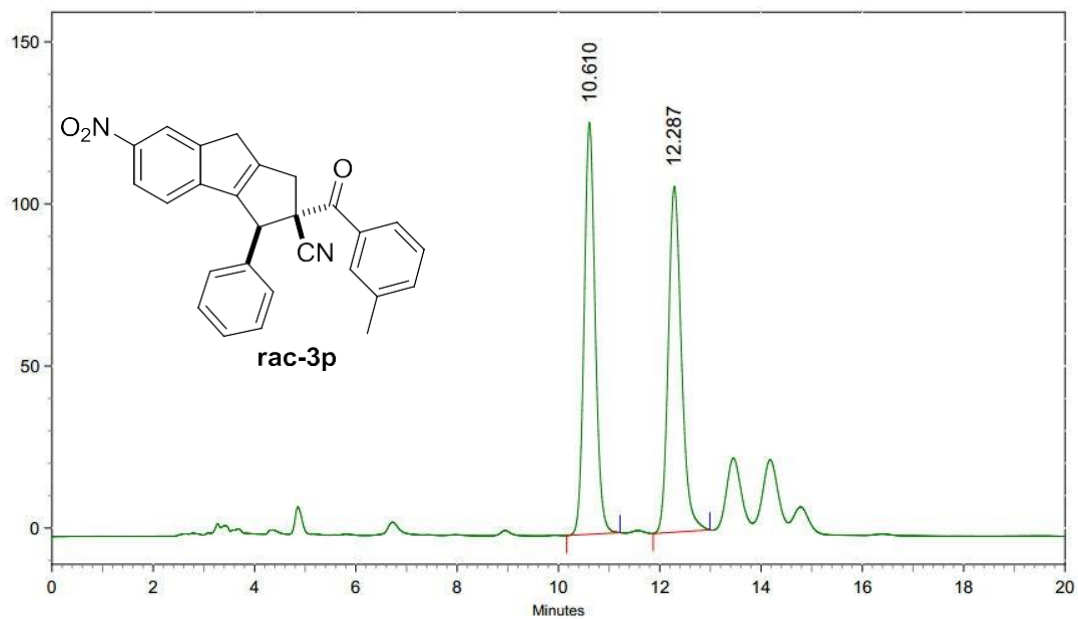

**AREA PERCENT REPORT**

| Peak No. | Ret Time | Width | Height  | Area     | Area [%] |
|----------|----------|-------|---------|----------|----------|
| 1        | 10.610   | 1.053 | 2131351 | 32150434 | 49.8933  |
| 2        | 12.287   | 1.120 | 1789656 | 32287971 | 50.1067  |

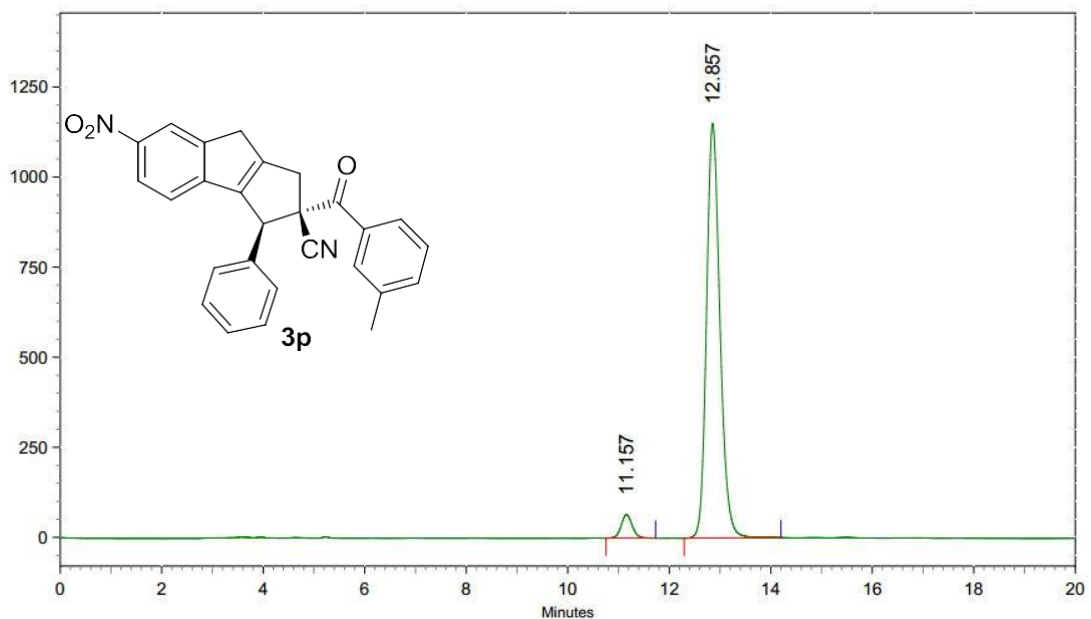

**AREA PERCENT REPORT**

| Peak No. | Ret Time | Width | Height   | Area      | Area [%] |
|----------|----------|-------|----------|-----------|----------|
| 1        | 11.157   | 0.977 | 1099093  | 16538190  | 4.4579   |
| 2        | 12.857   | 1.907 | 19301059 | 354450217 | 95.5421  |

# Spectrum Plot Report

|                |                   |              |            |              |                                   |
|----------------|-------------------|--------------|------------|--------------|-----------------------------------|
| Name           | CYC-20191018-59   | Rack Pos.    | Instrument | Instrument 1 | Operator                          |
| Inj. Vol. (ul) | 10                | Plate Pos.   | IRM Status | Success      |                                   |
| Data File      | CYC-20191018-59.d | Method (Acq) | TOF.m      | Comment      | Acq. Time (Local)                 |
|                |                   |              |            |              | 10/29/2019 3:52:21 PM (UTC+08:00) |

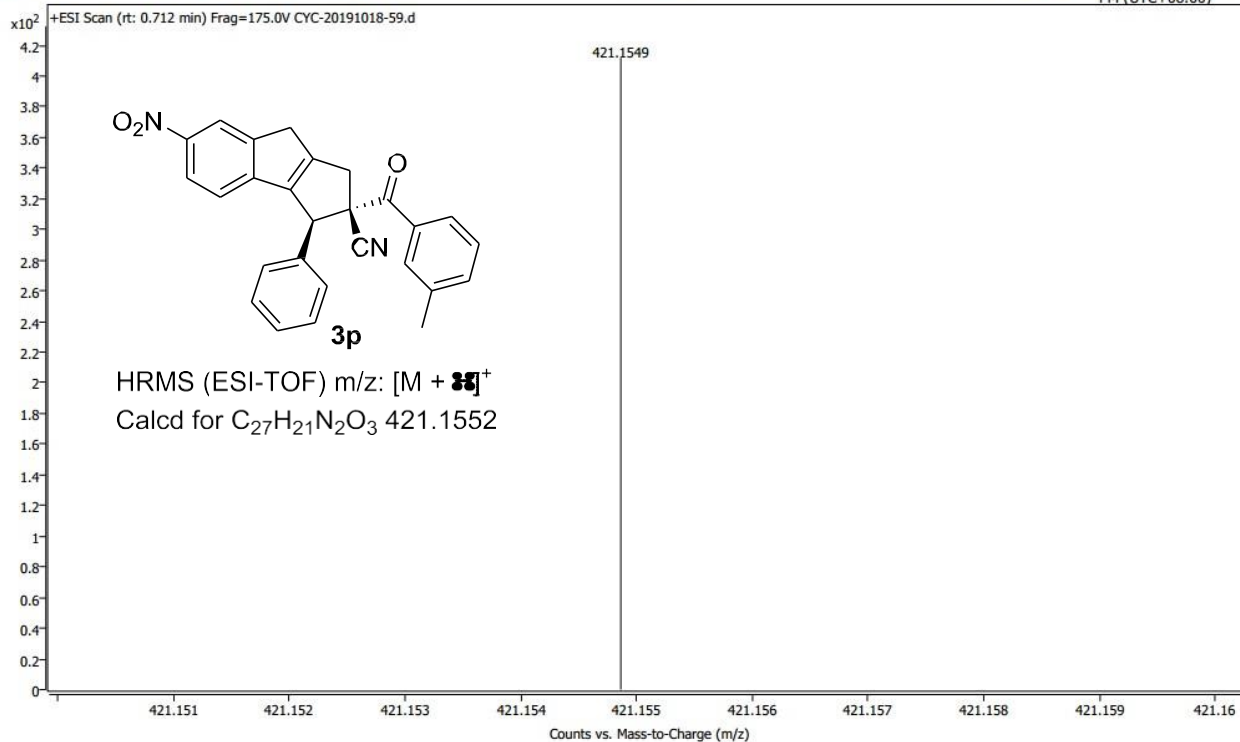

8.2937  
8.2522  
8.0685  
8.0472  
8.0411  
8.0377  
8.0322  
8.0107  
7.9122  
7.8114  
7.5109  
7.4905  
7.3929  
7.3887  
7.3331  
7.3295  
7.3103  
7.3104  
7.3041  
7.2929  
7.2892  
6.817  
6.796

5.170

3.8633  
3.8522  
3.6965  
3.6877  
3.6511  
3.6399  
3.5311  
3.4811  
3.473

2.417

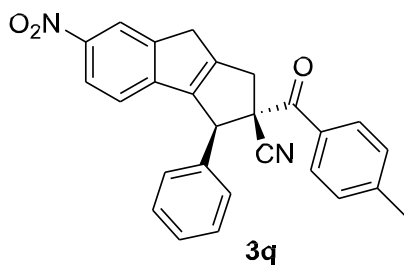

$^1\text{H}$  NMR (400 MHz,  $\text{CDCl}_3$ )

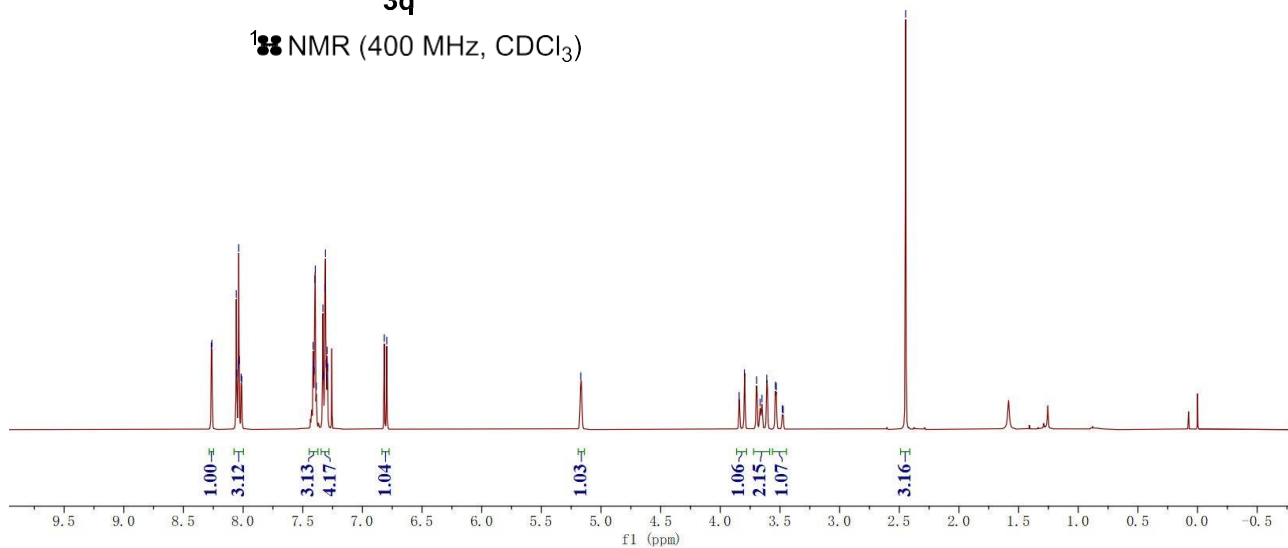

190.076  
152.443  
148.358  
146.261  
146.891  
146.987  
146.961  
136.060  
136.206  
136.184  
132.610  
129.096  
128.853  
123.107  
116.817  
119.512  
119.215

62.266

53.890

41.812

35.738

21.805

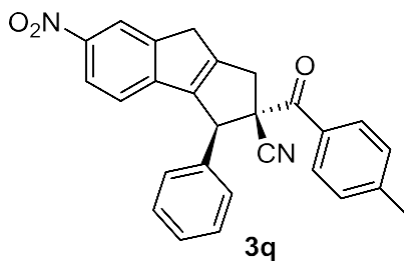

$^{13}\text{C}$  NMR (100 MHz,  $\text{CDCl}_3$ )

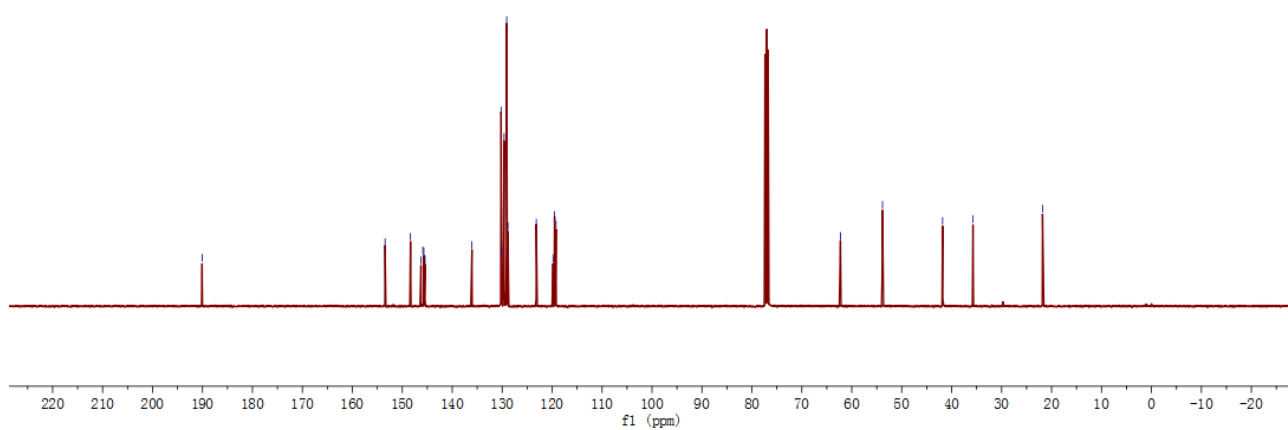

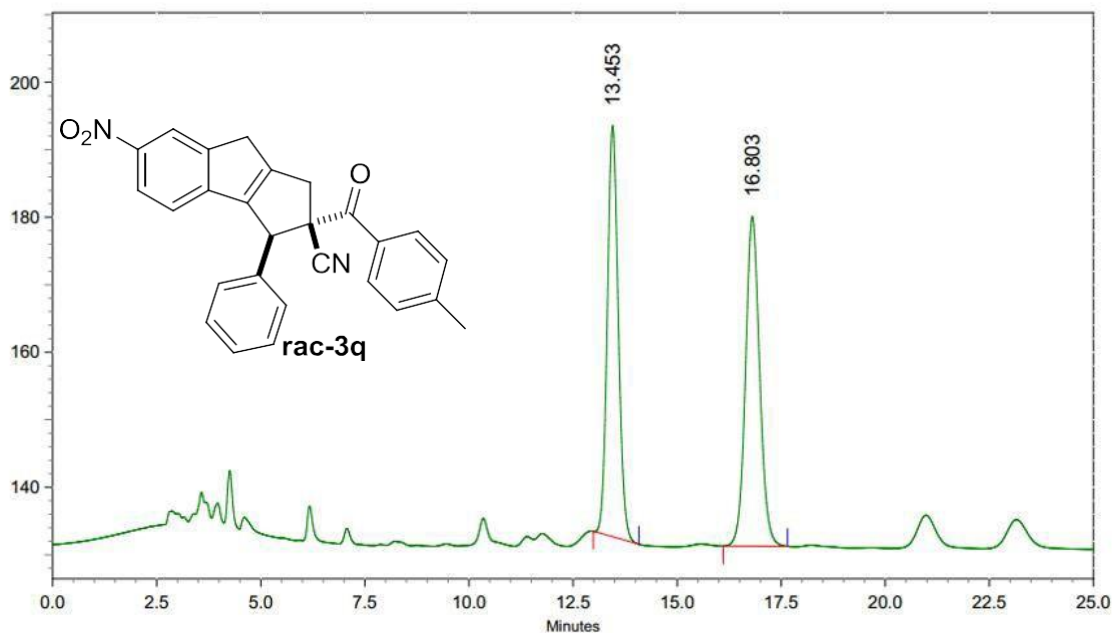

**AREA PERCENT REPORT**

| Peak No. | Ret Time | Width | Height  | Area     | Area [%] |
|----------|----------|-------|---------|----------|----------|
| 1        | 13.453   | 1.090 | 1021182 | 18628741 | 48.9803  |
| 2        | 16.803   | 1.540 | 819142  | 19404378 | 51.0197  |

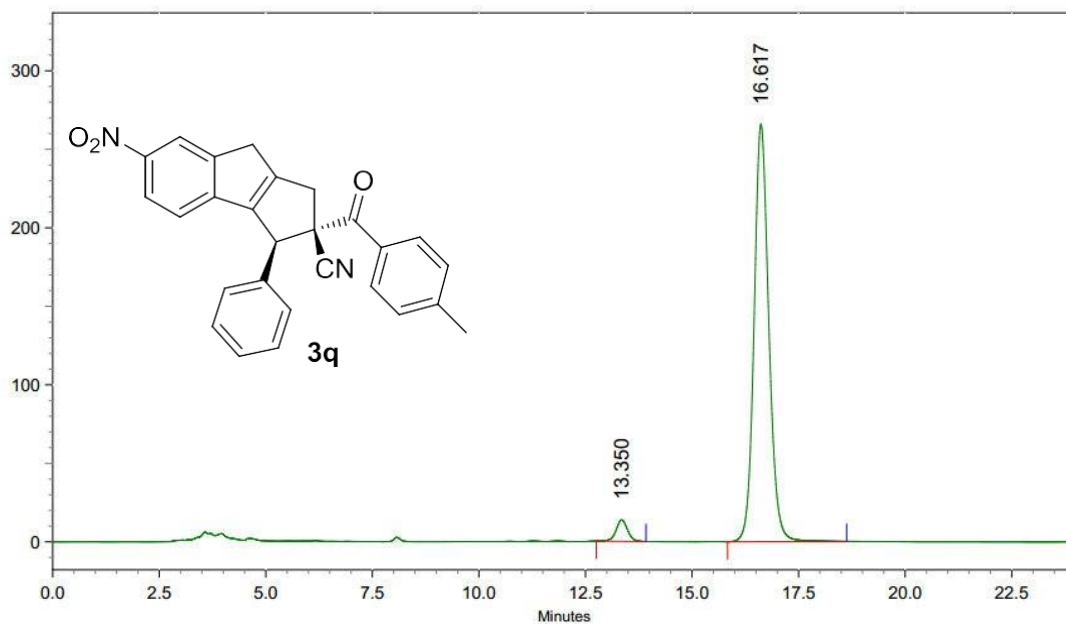

**AREA PERCENT REPORT**

| Peak No. | Ret Time | Width | Height  | Area      | Area [%] |
|----------|----------|-------|---------|-----------|----------|
| 1        | 13.350   | 1.167 | 229248  | 4293777   | 3.8584   |
| 2        | 16.617   | 2.793 | 4460575 | 106989874 | 96.1416  |

# Spectrum Plot Report

|                |                   |              |       |            |              |                   |                                   |
|----------------|-------------------|--------------|-------|------------|--------------|-------------------|-----------------------------------|
| Name           | CYC-20191103-12   | Rack Pos.    |       | Instrument | Instrument 1 | Operator          |                                   |
| Inj. Vol. (ul) | 10                | Plate Pos.   |       | IRM Status | Success      |                   |                                   |
| Data File      | CYC-20191103-12.d | Method (Acq) | TOF.m | Comment    |              | Acq. Time (Local) | 11/8/2019 10:53:36 AM (UTC+08:00) |

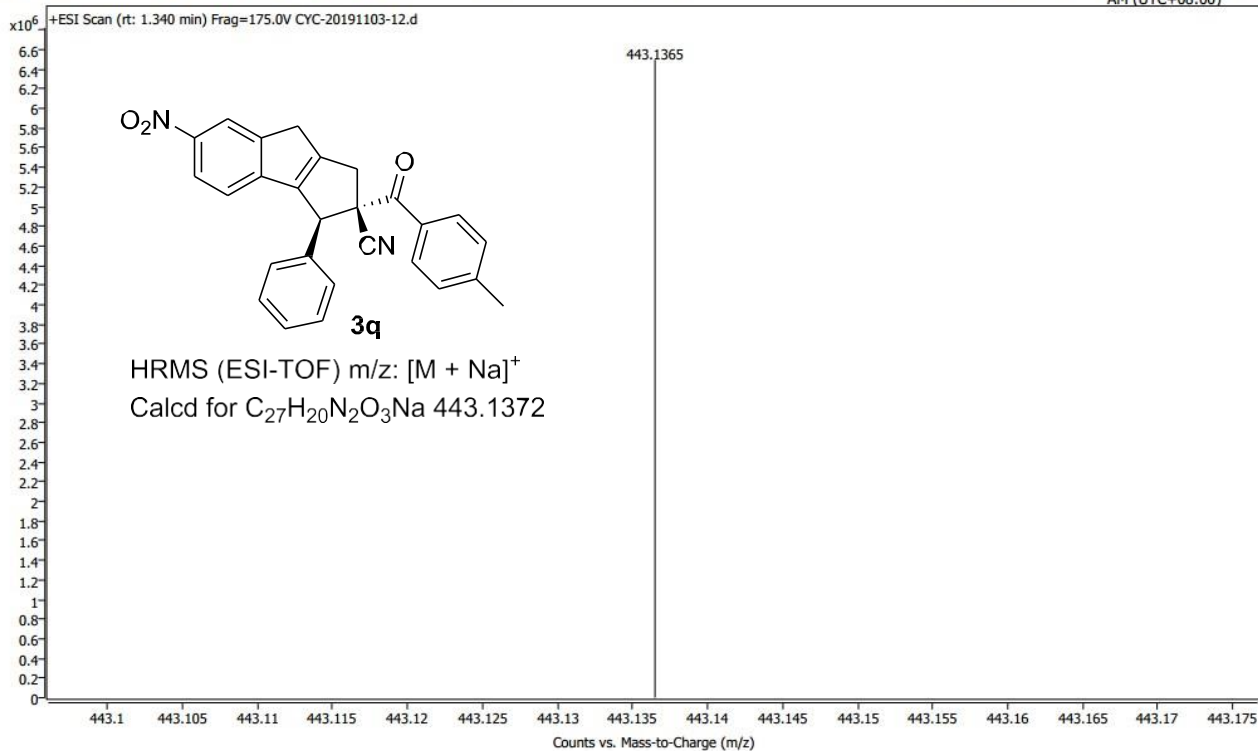

8.675  
8.671  
8.268  
8.263  
8.144  
8.142  
8.125  
8.120  
8.027  
8.022  
8.006  
8.001  
7.960  
7.958  
7.932  
7.910  
7.890  
7.887  
7.863  
7.858  
7.864  
7.857  
7.840  
7.807  
7.804  
7.599  
7.599  
7.583  
7.583  
7.566  
7.565  
7.562  
7.447  
7.443  
7.438  
7.420  
7.420  
7.358  
7.349  
7.339  
7.338  
7.292  
6.771  
6.178

3.986  
3.942  
3.754  
3.709  
3.695  
3.568  
3.549  
3.499  
3.481

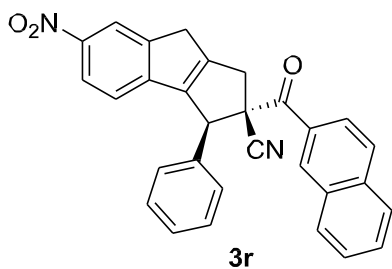

$^1\text{H NMR}$  (400 MHz,  $\text{CDCl}_3$ )

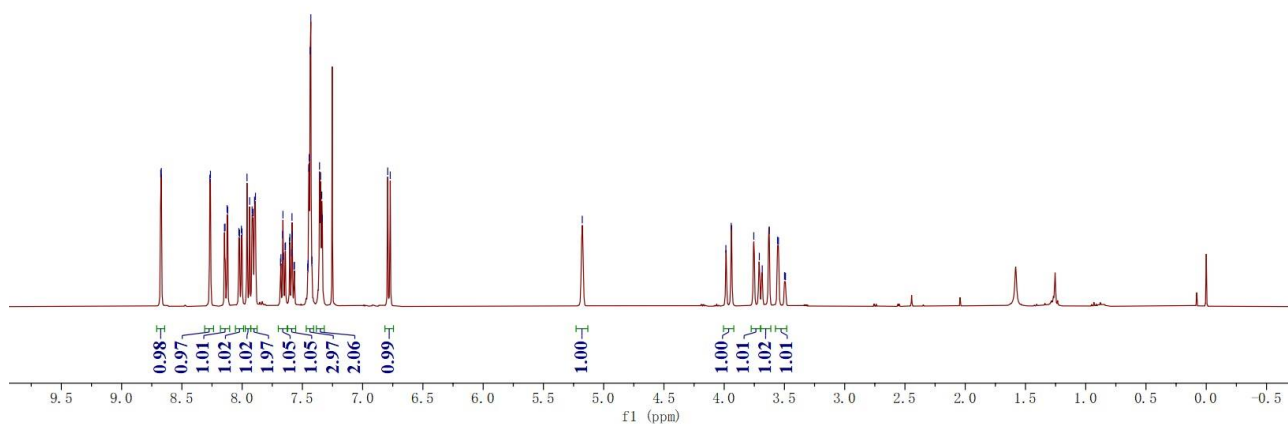

190.484

153.630  
148.325  
146.119  
146.843  
145.466  
138.992  
137.596  
137.596  
132.101  
132.101  
130.057  
128.879  
128.879  
129.247  
129.161  
129.003  
128.893  
128.893  
127.322  
127.322  
124.965  
123.181  
119.889  
119.889  
116.176

62.502

54.393

41.780

35.778

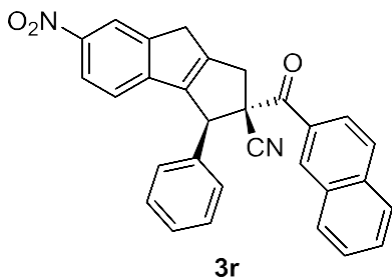

$^{13}\text{C NMR}$  (100 MHz,  $\text{CDCl}_3$ )

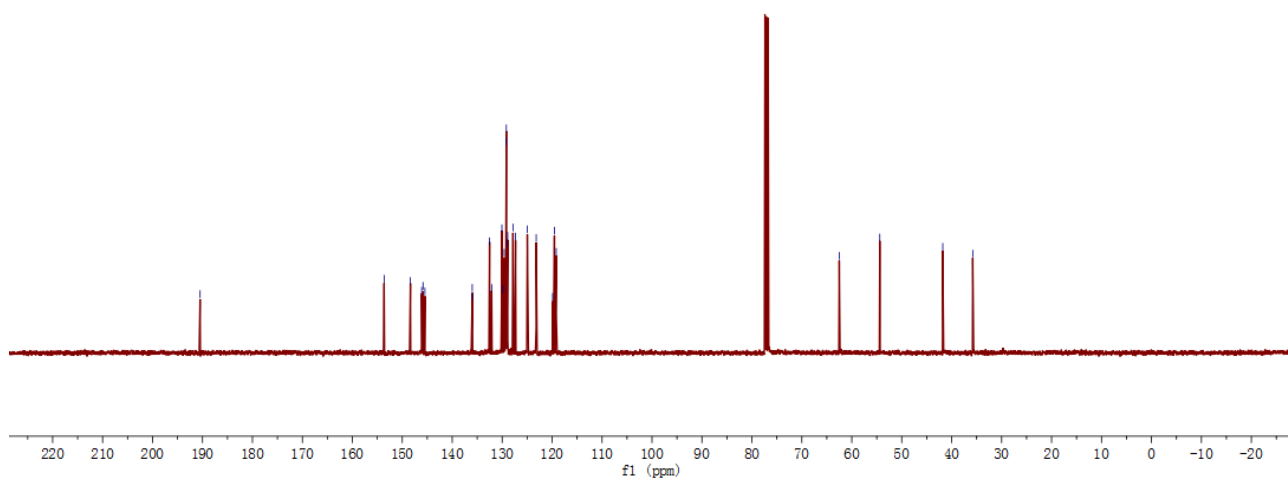

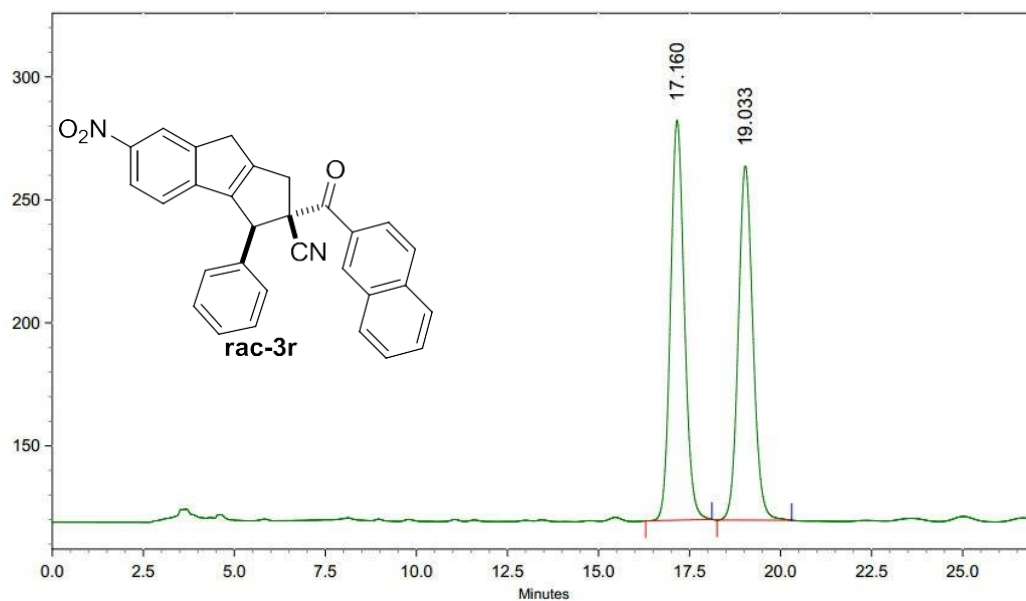

### AREA PERCENT REPORT

| Peak No. | Ret Time | Width | Height  | Area     | Area [%] |
|----------|----------|-------|---------|----------|----------|
| 1        | 17.160   | 1.820 | 2727111 | 72005261 | 51.5611  |
| 2        | 19.033   | 2.050 | 2415633 | 67645165 | 48.4389  |

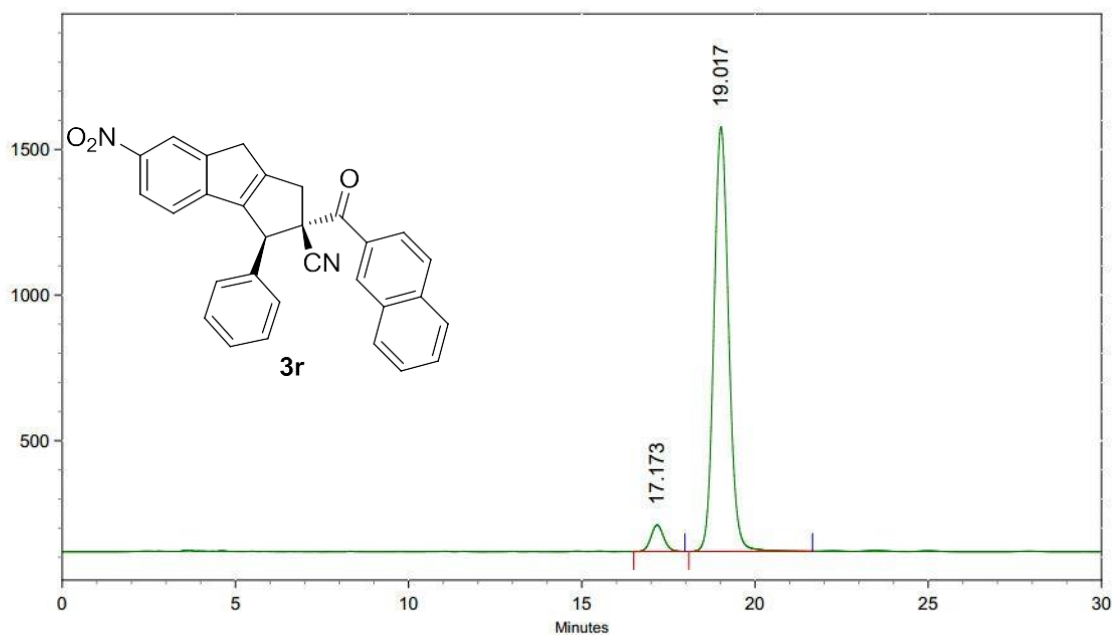

### AREA PERCENT REPORT

| Peak No. | Ret Time | Width | Height   | Area      | Area [%] |
|----------|----------|-------|----------|-----------|----------|
| 1        | 17.173   | 1.480 | 1527549  | 39200306  | 5.1541   |
| 2        | 19.017   | 3.563 | 24445602 | 721371191 | 94.8459  |



# Spectrum Plot Report

|                |                   |              |       |            |              |                   |                                   |
|----------------|-------------------|--------------|-------|------------|--------------|-------------------|-----------------------------------|
| Name           | CYC-20191018-58   | Rack Pos.    |       | Instrument | Instrument 1 | Operator          |                                   |
| Inj. Vol. (ul) | 10                | Plate Pos.   |       | IRM Status | Success      |                   |                                   |
| Data File      | CYC-20191018-58.d | Method (Acq) | TOF.m | Comment    |              | Acq. Time (Local) | 10/29/2019 3:49:20 PM (UTC+08:00) |

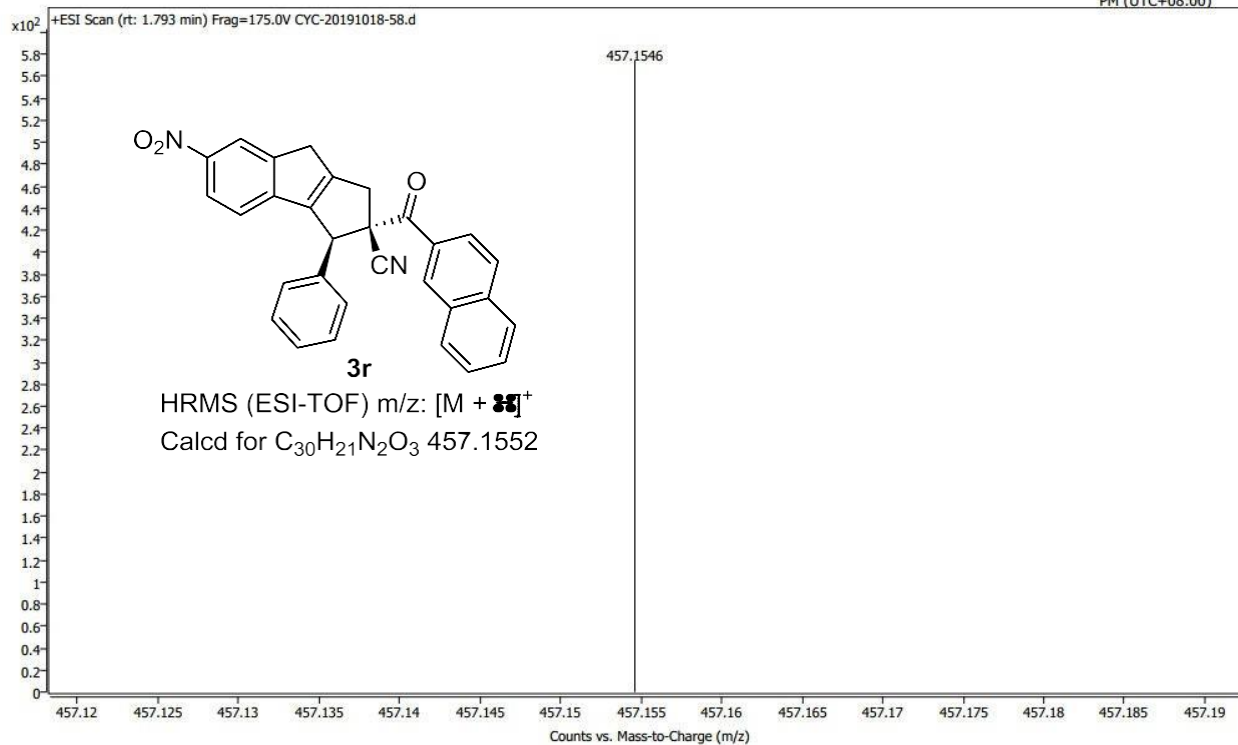

8.167  
8.164  
8.161  
8.143  
7.995  
7.974  
7.975  
7.967  
7.948  
7.944  
7.939  
7.933  
7.938  
7.911  
7.908  
7.882  
7.889  
7.884  
7.882  
7.822  
7.814  
7.814  
7.809  
7.808  
7.798  
7.779  
7.754  
7.698  
5.210

4.085  
3.938  
3.909  
3.899  
3.821  
3.777  
3.687

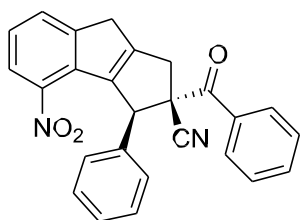

**3s**

$^1\text{H}$  NMR (400 MHz,  $\text{CDCl}_3$ )

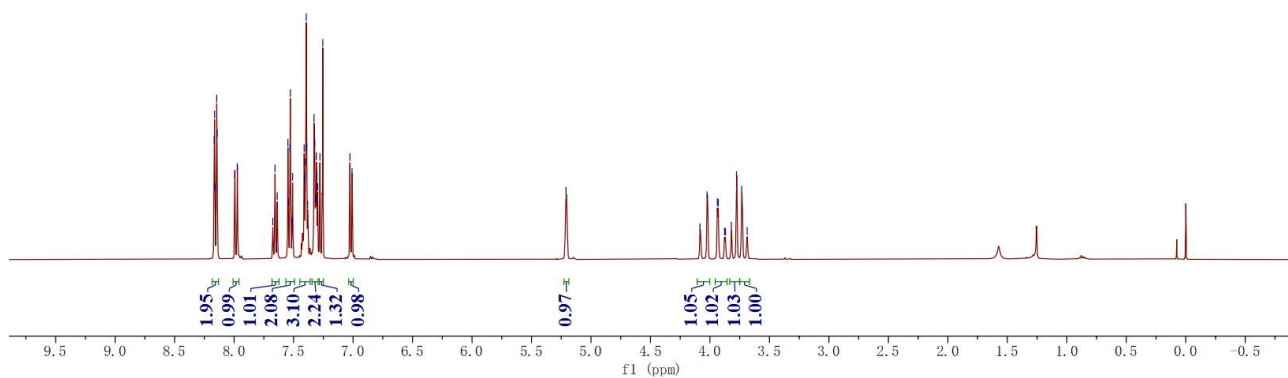

190.600

149.628  
145.435  
144.606  
143.100  
142.999  
138.154  
134.371  
132.815  
130.027  
129.074  
128.918  
128.806  
125.165  
120.201  
119.723

62.580  
53.802  
41.584  
37.199

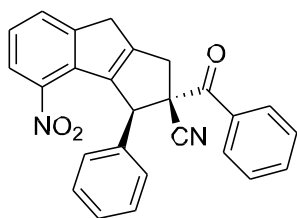

**3s**

$^{13}\text{C}$  NMR (100 MHz,  $\text{CDCl}_3$ )

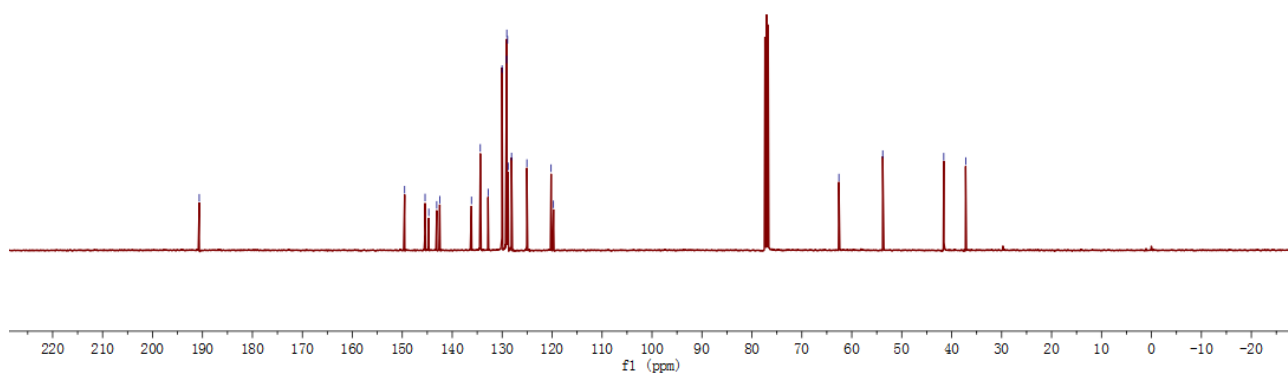

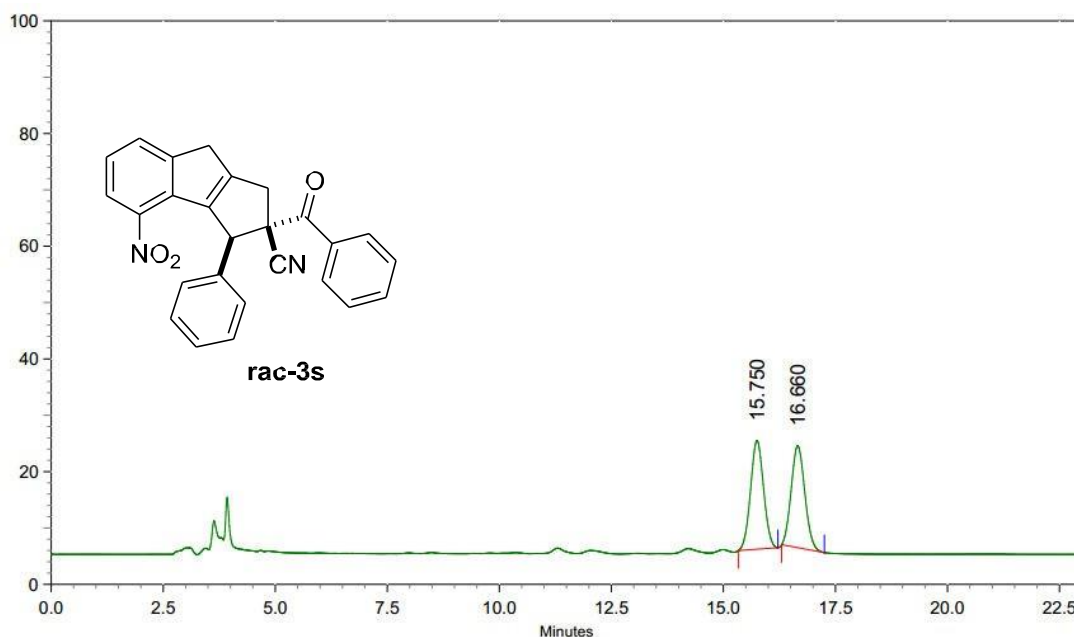

**AREA PERCENT REPORT**

| Peak No. | Ret Time | Width | Height | Area    | Area [%] |
|----------|----------|-------|--------|---------|----------|
| 1        | 15.750   | 0.877 | 323440 | 6548981 | 50.5386  |
| 2        | 16.660   | 0.953 | 303604 | 6409392 | 49.4614  |

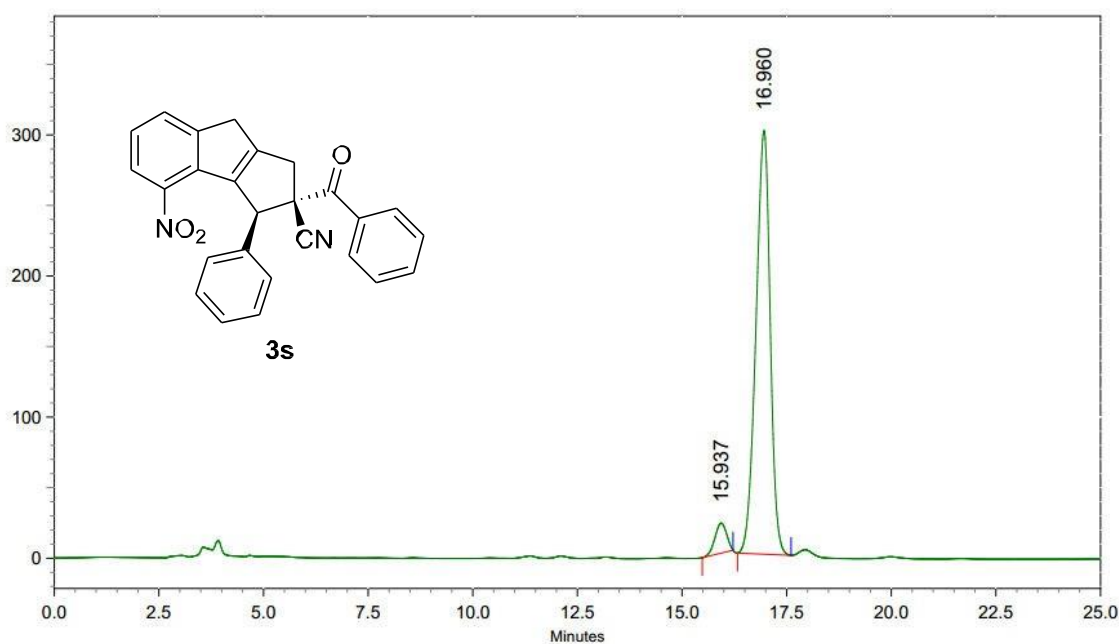

**AREA PERCENT REPORT**

| Peak No. | Ret Time | Width | Height  | Area      | Area [%] |
|----------|----------|-------|---------|-----------|----------|
| 1        | 15.937   | 0.737 | 357278  | 6930989   | 5.4934   |
| 2        | 16.960   | 1.280 | 5037079 | 119237371 | 94.5066  |

Spectrum from 20220219.wiff2 (sample 184) - 112-1, -TOF MS (200 - 600) from 0.058 to 0.088 min, sub...wiff2 (sample 184) - 112-1, -TOF MS (200 - 600) from 1.090 to 1.214 min], Recalibrated, centroidec

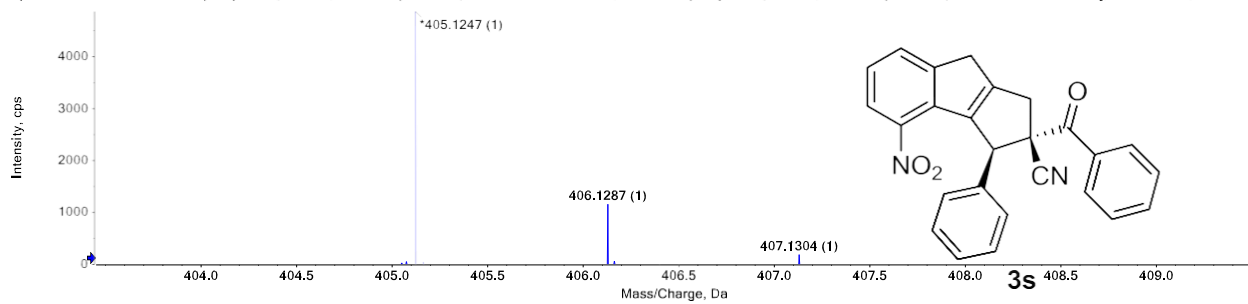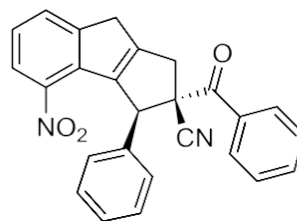

3s

HRMS (ESI-TOF) m/z: [M - 33]<sup>-</sup>  
Calcd for C<sub>26</sub>H<sub>17</sub>N<sub>2</sub>O<sub>3</sub> 405.1250

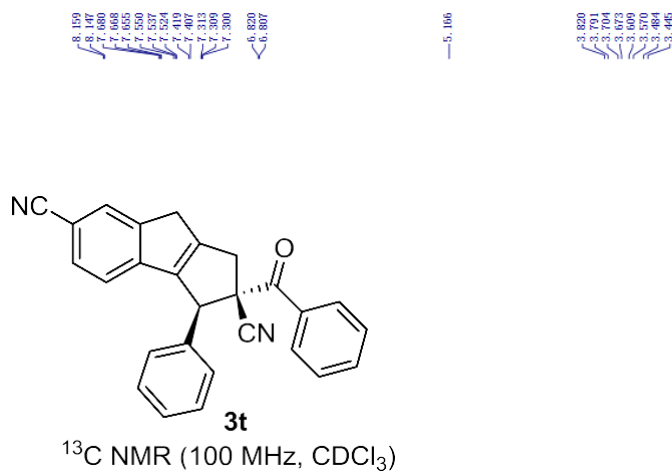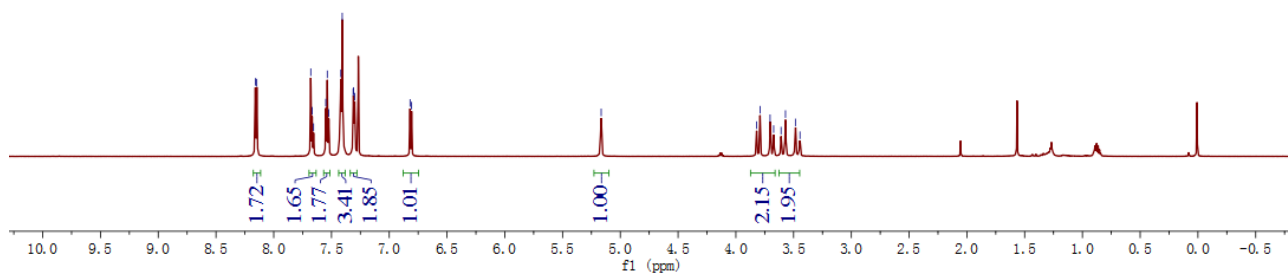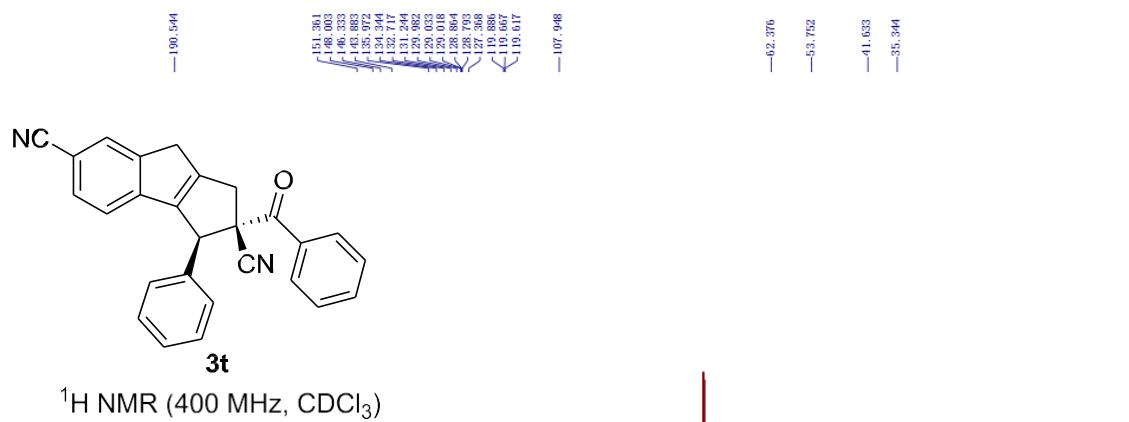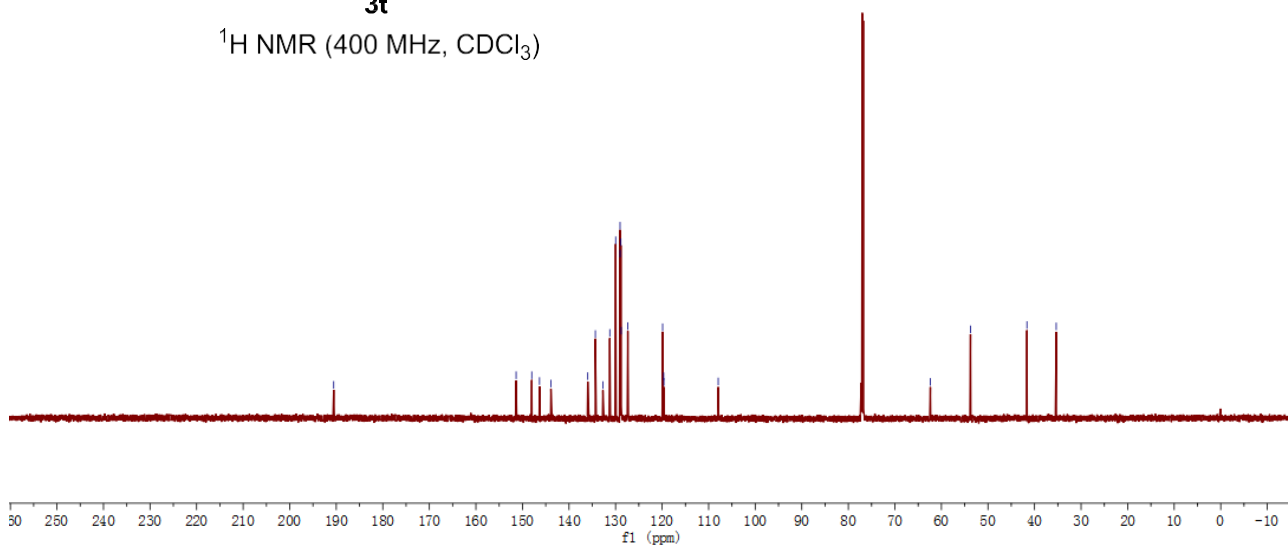

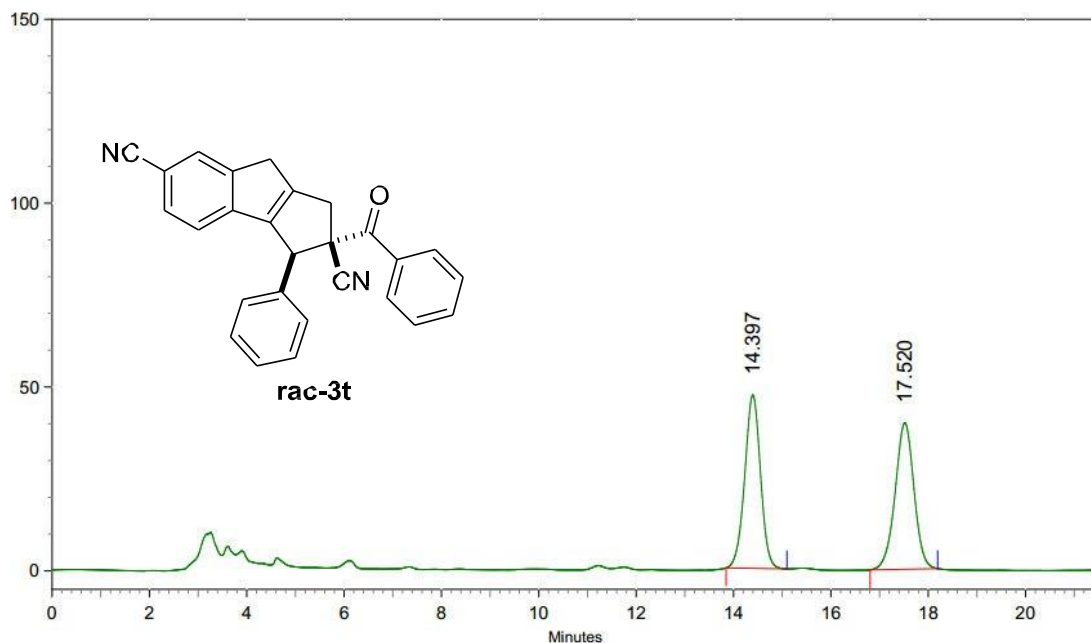

**AREA PERCENT REPORT**

| Peak No. | Ret Time | Width | Height | Area     | Area [%] |
|----------|----------|-------|--------|----------|----------|
| 1        | 14.397   | 1.250 | 790811 | 17832981 | 49.8193  |
| 2        | 17.520   | 1.387 | 668040 | 17962342 | 50.1807  |

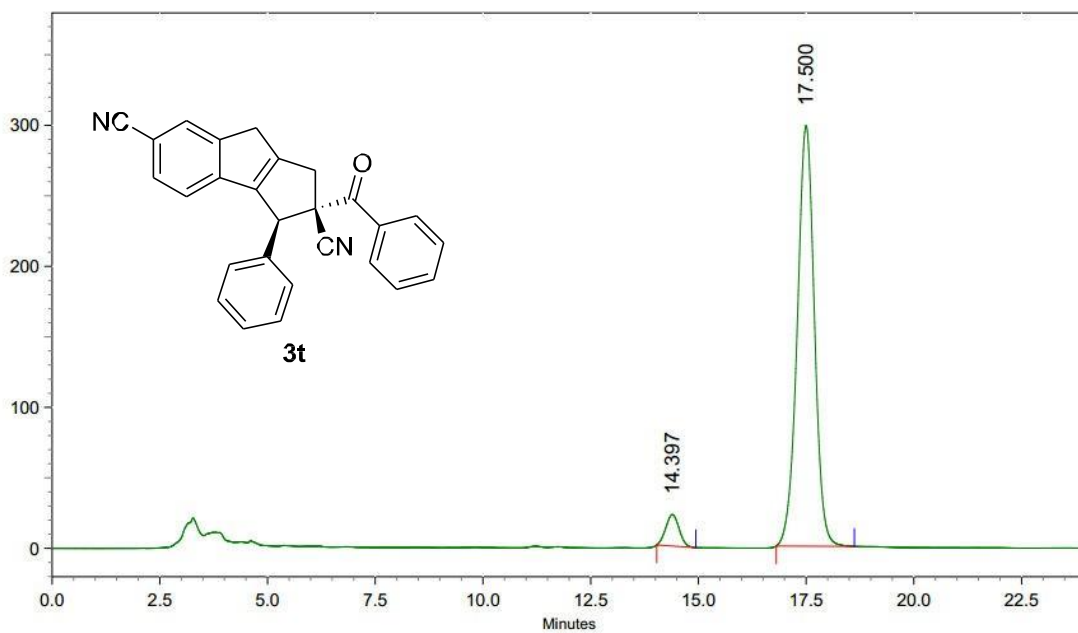

**AREA PERCENT REPORT**

| Peak No. | Ret Time | Width | Height  | Area      | Area [%] |
|----------|----------|-------|---------|-----------|----------|
| 1        | 14.397   | 0.907 | 374621  | 8037502   | 5.4937   |
| 2        | 17.500   | 1.813 | 5003610 | 138265756 | 94.5063  |

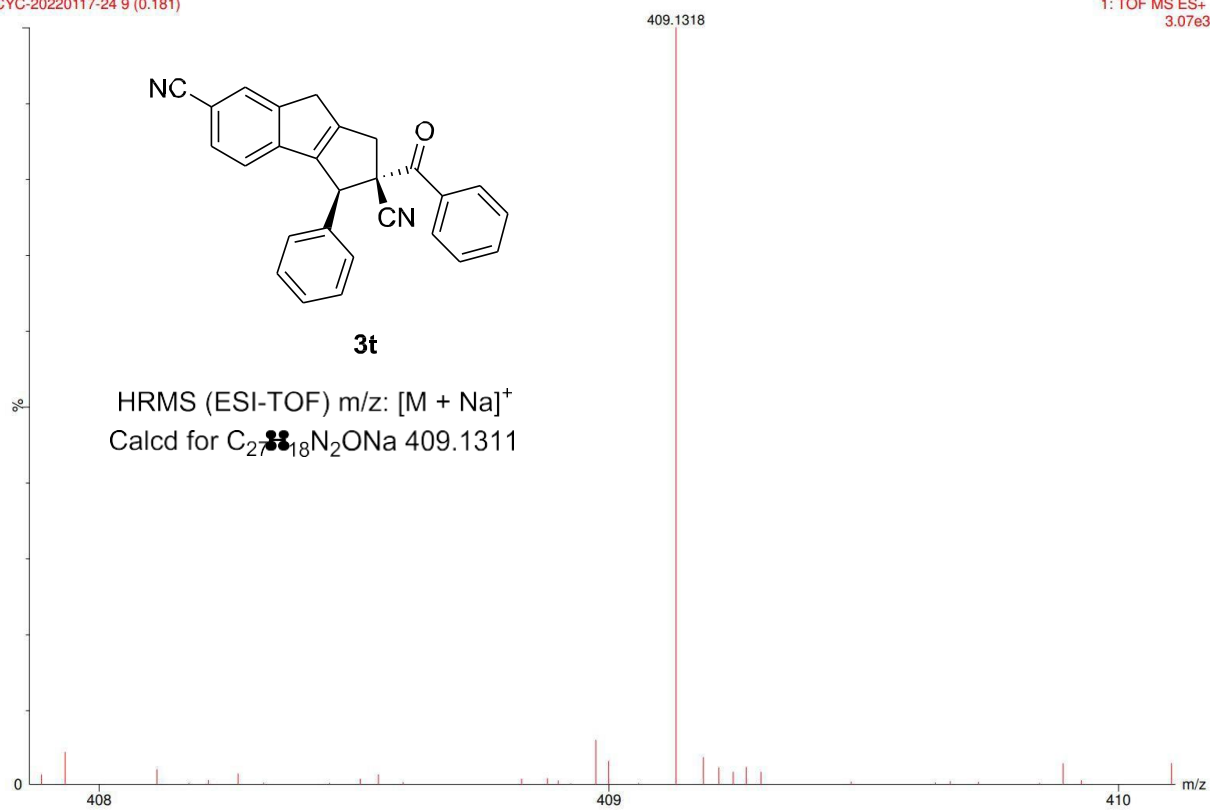

8.309  
8.215  
7.942  
7.937  
7.921  
7.919  
7.306  
7.298  
7.293  
7.271  
7.267  
7.262  
7.252  
7.242  
7.227  
7.222  
6.931  
6.928  
6.910  
6.529

4.045

3.676  
3.618  
3.583  
3.578  
3.501  
3.489  
3.483  
3.465  
3.439  
3.389

2.687

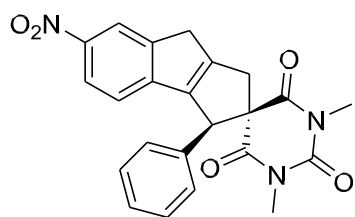

**5a**

<sup>1</sup>H NMR (400 MHz, CDCl<sub>3</sub>)

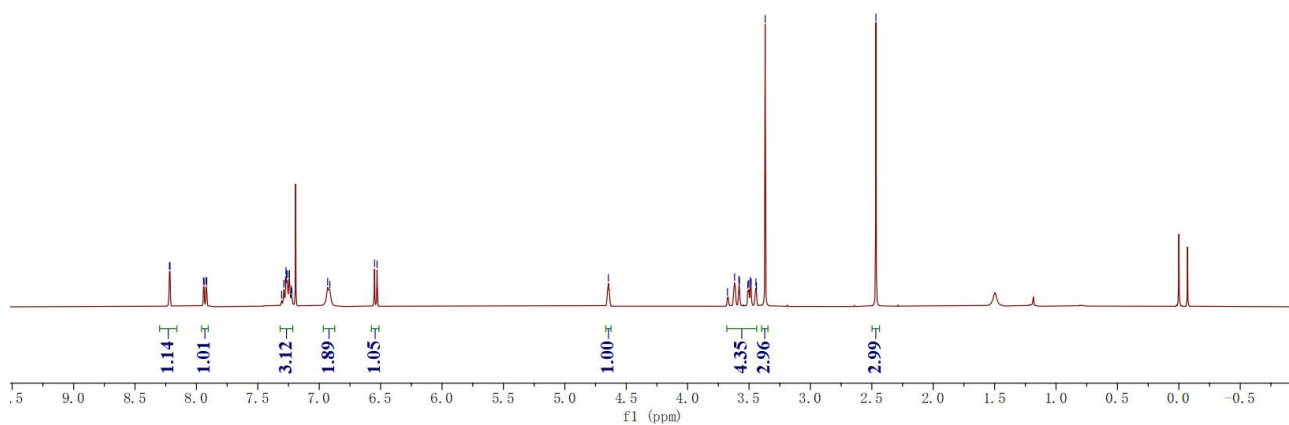

170.127  
167.555  
157.849  
149.807  
147.576  
145.182  
144.103  
140.976  
138.483  
136.076  
127.827  
127.583  
122.005  
118.452  
117.877

67.949  
60.801

35.321  
34.860  
28.222  
27.111

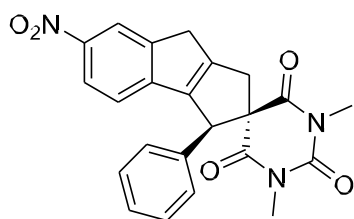

**5a**

<sup>13</sup>C NMR (100 MHz, CDCl<sub>3</sub>)

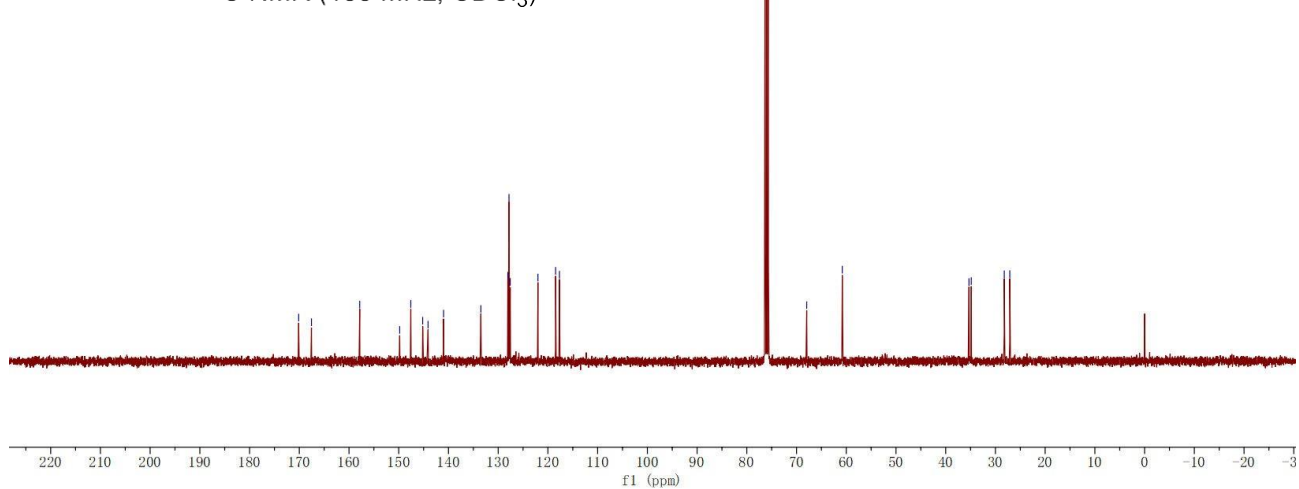



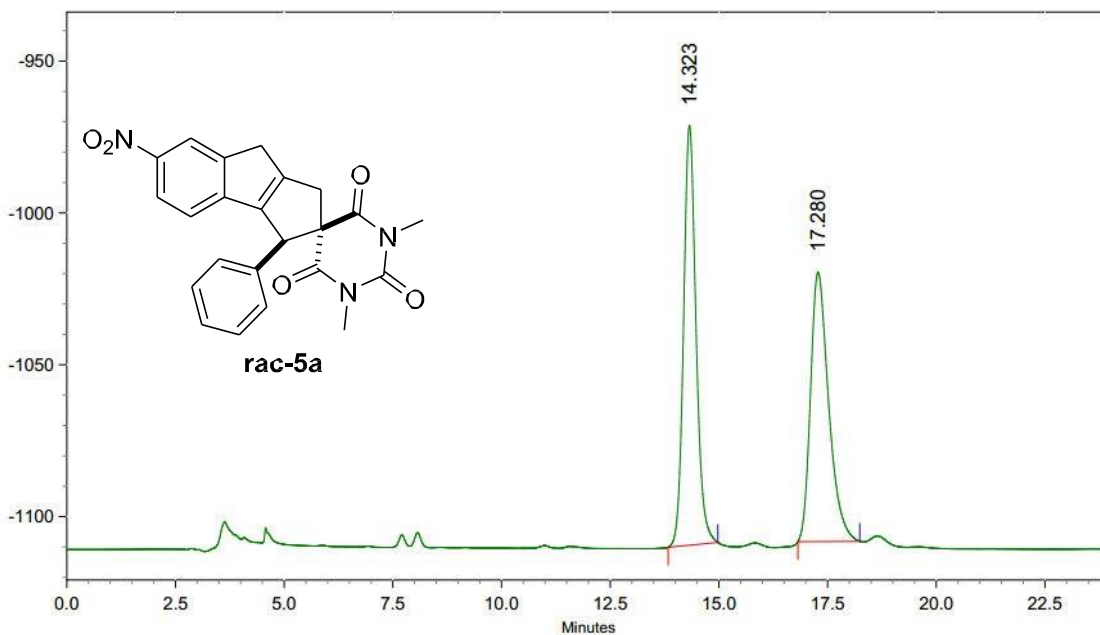

### AREA PERCENT REPORT

| Peak No. | Ret Time | Width | Height  | Area     | Area [%] |
|----------|----------|-------|---------|----------|----------|
| 1        | 14.323   | 1.143 | 2318072 | 45990372 | 51.6594  |
| 2        | 17.280   | 1.423 | 1487545 | 43035705 | 48.3406  |

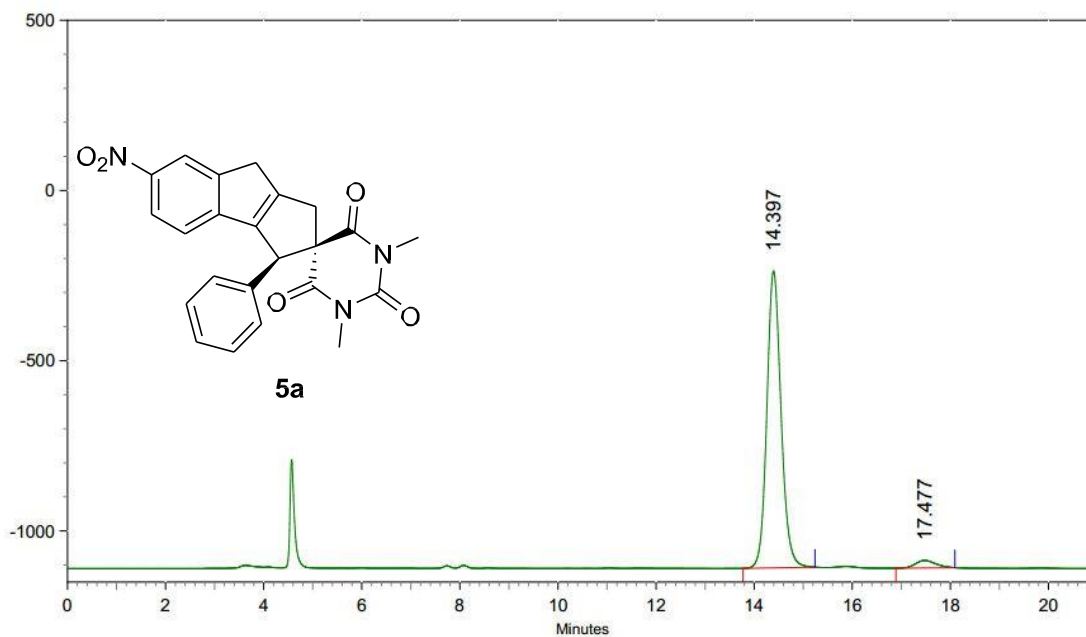

### AREA PERCENT REPORT

| Peak No. | Ret Time | Width | Height   | Area      | Area [%] |
|----------|----------|-------|----------|-----------|----------|
| 1        | 14.397   | 1.467 | 14625986 | 293562871 | 96.5107  |
| 2        | 17.477   | 1.203 | 369676   | 10613487  | 3.4893   |

# Spectrum Plot Report

|                |                   |              |       |            |              |                   |                      |
|----------------|-------------------|--------------|-------|------------|--------------|-------------------|----------------------|
| Name           | CYC-20200824-25   | Rack Pos.    |       | Instrument | Instrument 1 | Operator          |                      |
| Inj. Vol. (ul) | 10                | Plate Pos.   |       | IRM Status | Success      | Acq. Time (Local) | 8/27/2020 2:37:37 PM |
| Data File      | CYC-20200824-25.d | Method (Acq) | TOF.m | Comment    |              |                   | (UTC+08:00)          |

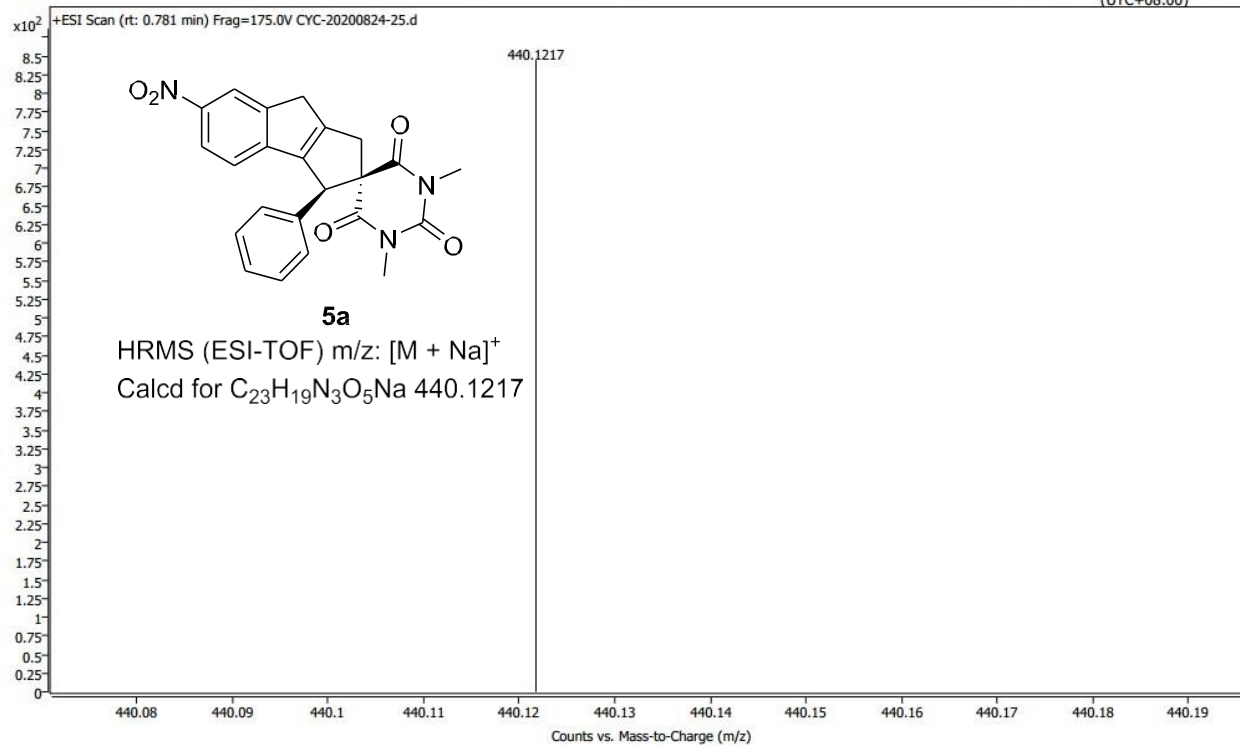

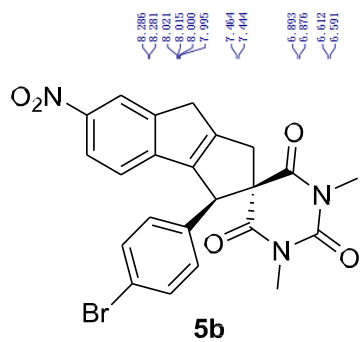

$^1\text{H}$  NMR (400 MHz,  $\text{CDCl}_3$ )

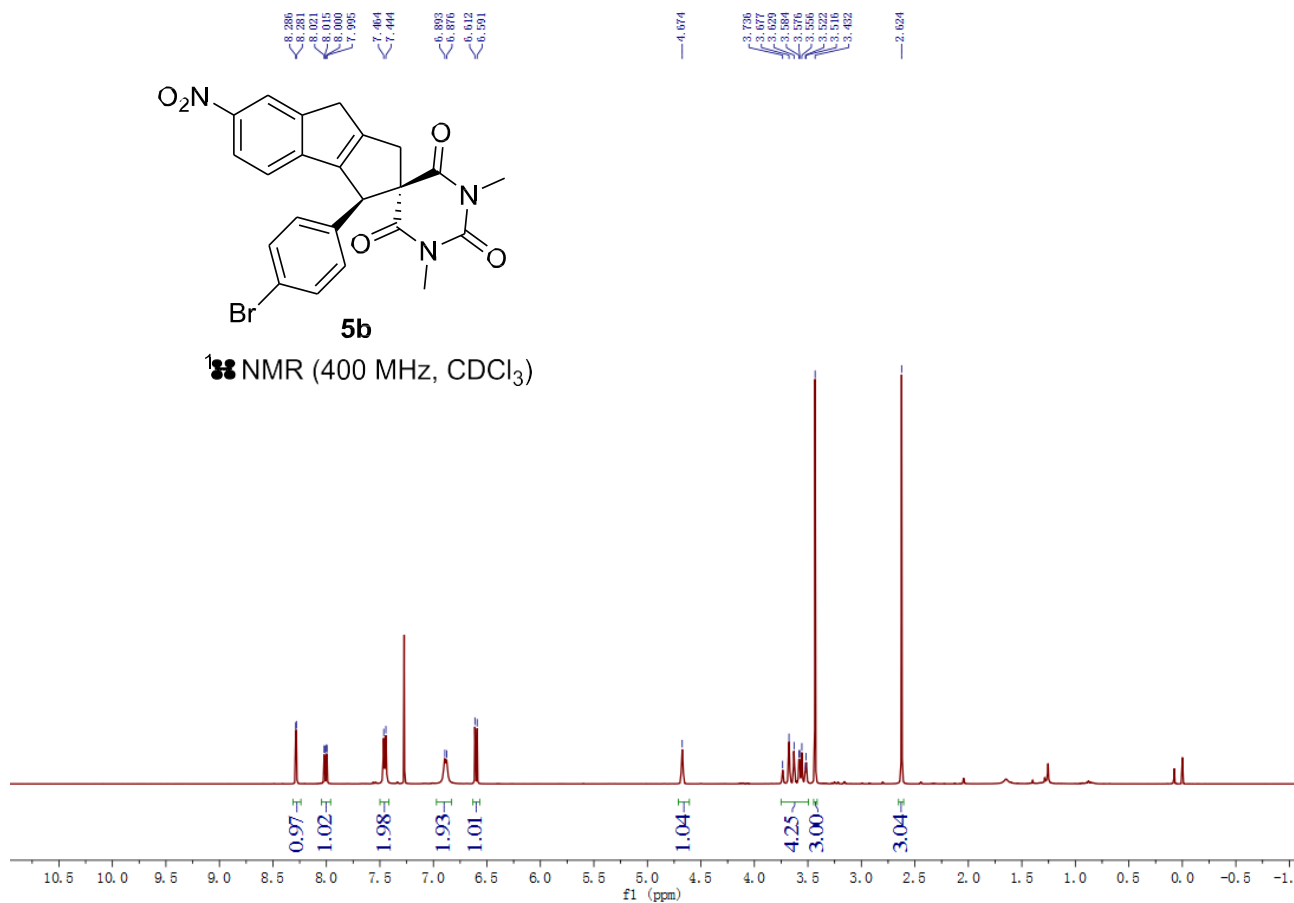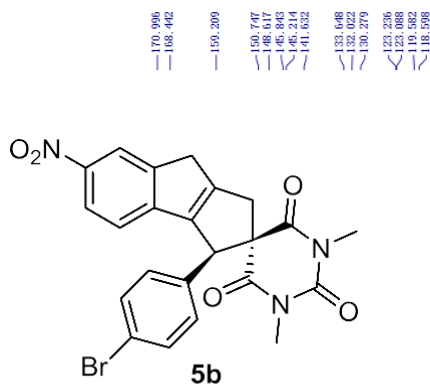

$^{13}\text{C}$  NMR (100 MHz,  $\text{CDCl}_3$ )

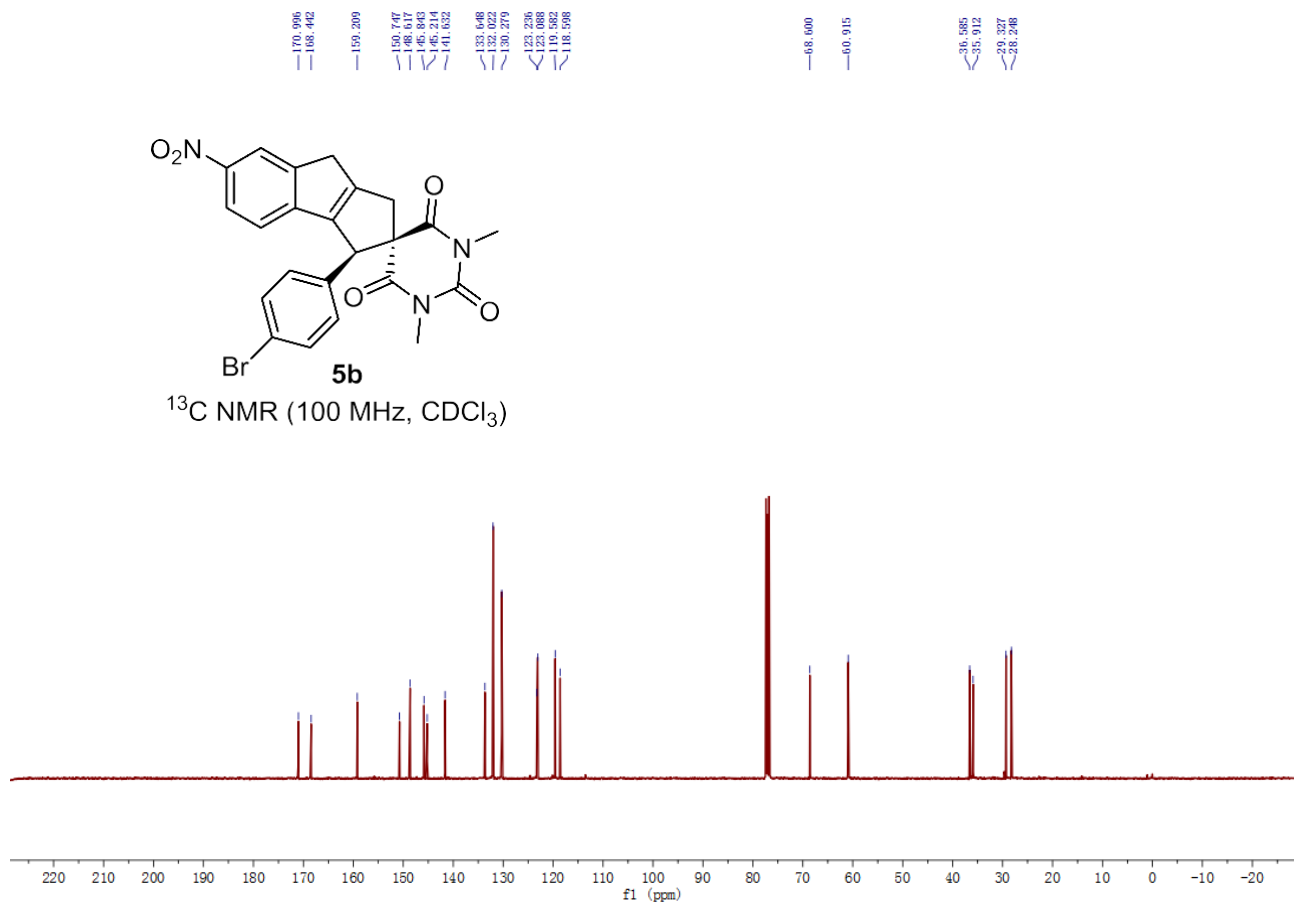

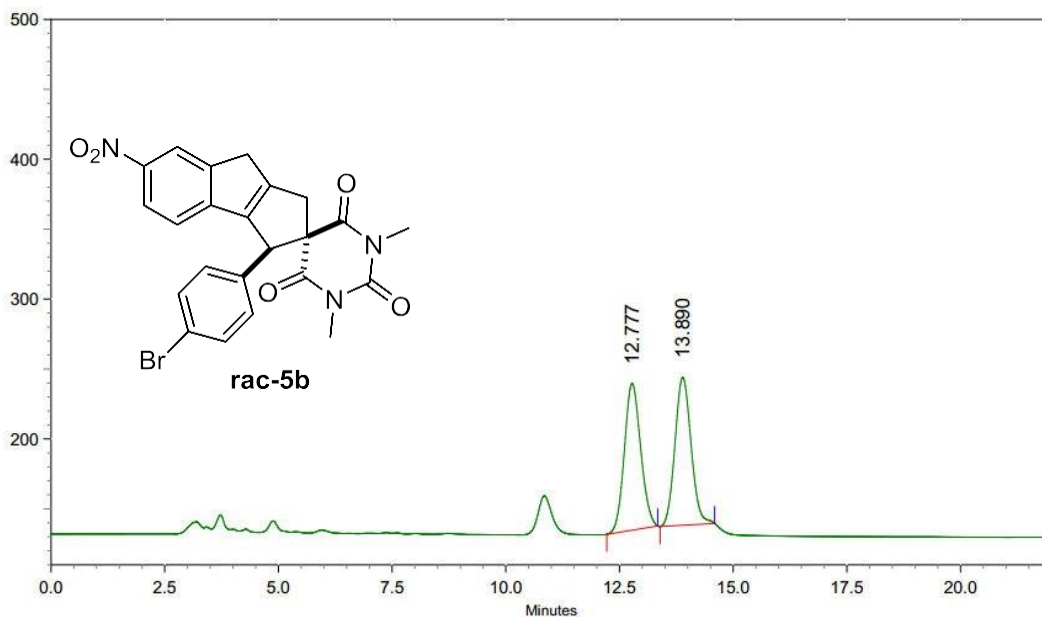

**AREA PERCENT REPORT**

| Peak No. | Ret Time | Width | Height  | Area     | Area [%] |
|----------|----------|-------|---------|----------|----------|
| 1        | 12.777   | 1.120 | 1762208 | 44032693 | 50.1633  |
| 2        | 13.890   | 1.200 | 1774725 | 43745957 | 49.8367  |

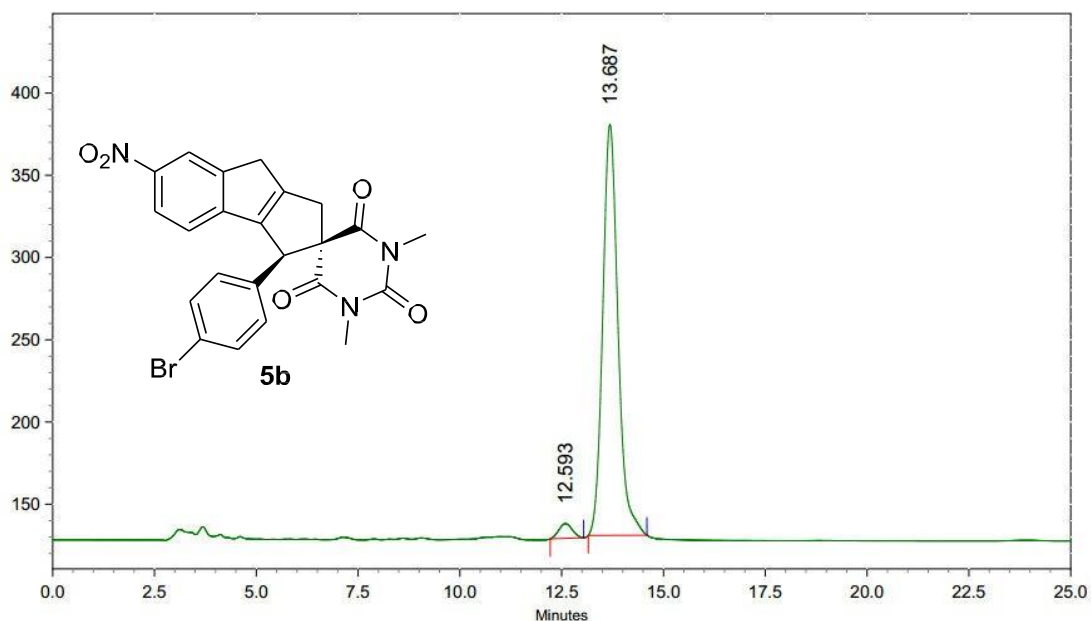

**AREA PERCENT REPORT**

| Peak No. | Ret Time | Width | Height  | Area      | Area [%] |
|----------|----------|-------|---------|-----------|----------|
| 1        | 12.593   | 0.820 | 149833  | 3452028   | 3.0683   |
| 2        | 13.687   | 1.440 | 4190582 | 109055039 | 96.9317  |

# Spectrum Plot Report

|                |                   |              |       |            |              |                   |                                     |
|----------------|-------------------|--------------|-------|------------|--------------|-------------------|-------------------------------------|
| Name           | CYC-20200824-26   | Rack Pos.    |       | Instrument | Instrument 1 | Operator          |                                     |
| Inj. Vol. (ul) | 10                | Plate Pos.   |       | IRM Status | Success      |                   |                                     |
| Data File      | CYC-20200824-26.d | Method (Acq) | TOF.m | Comment    |              | Acq. Time (Local) | 8/27/2020 2:40:36 PM<br>(UTC+08:00) |

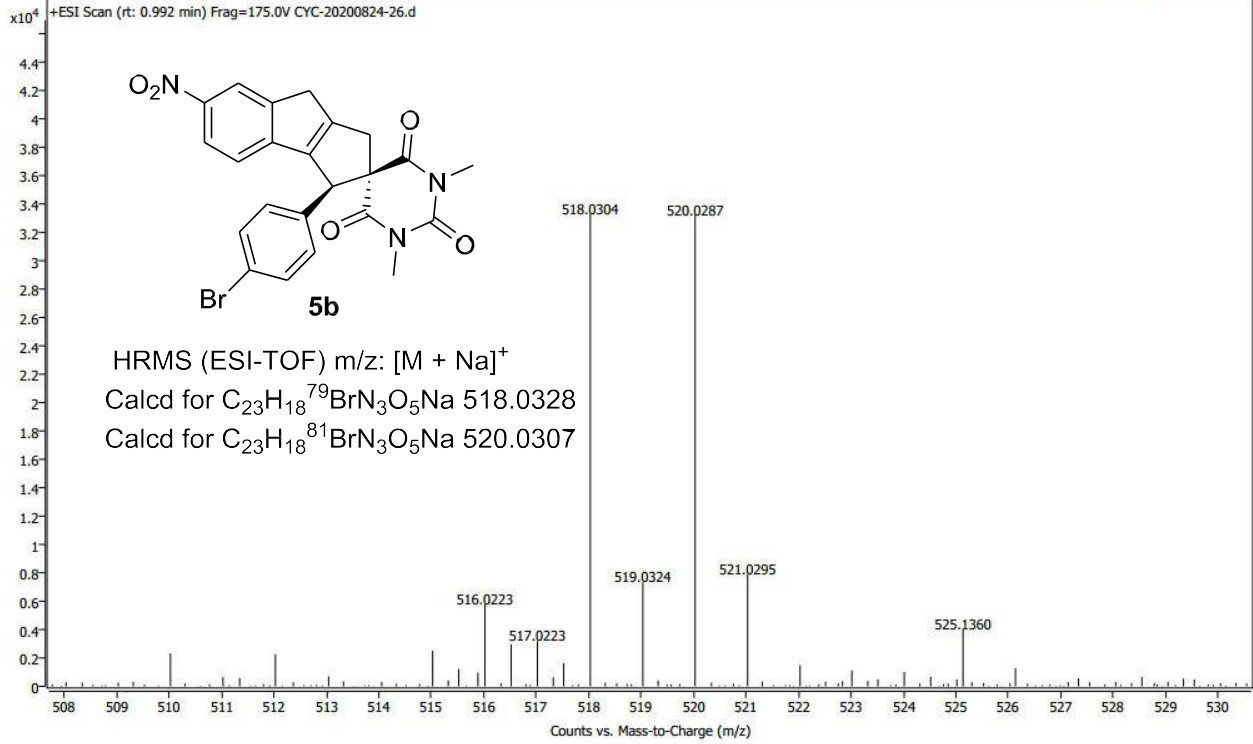

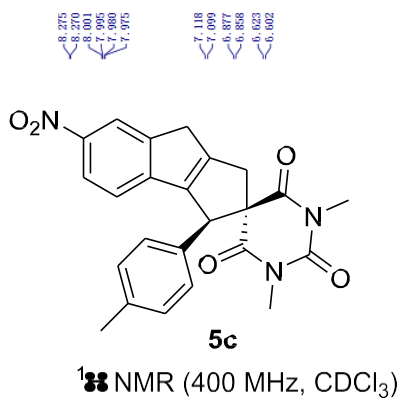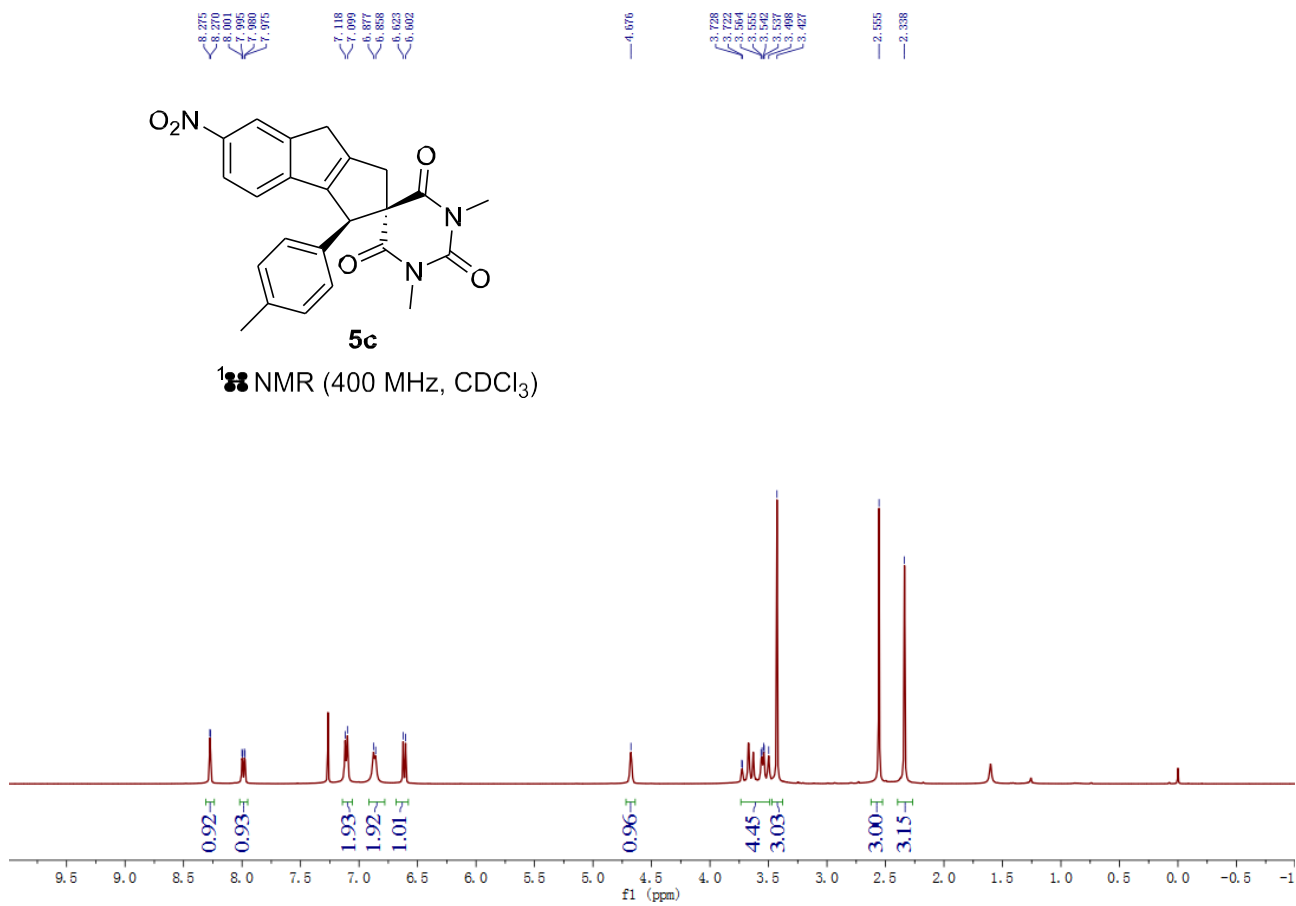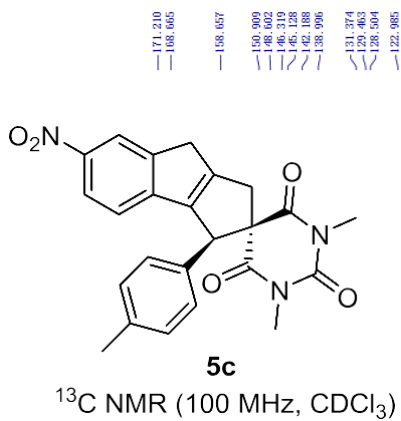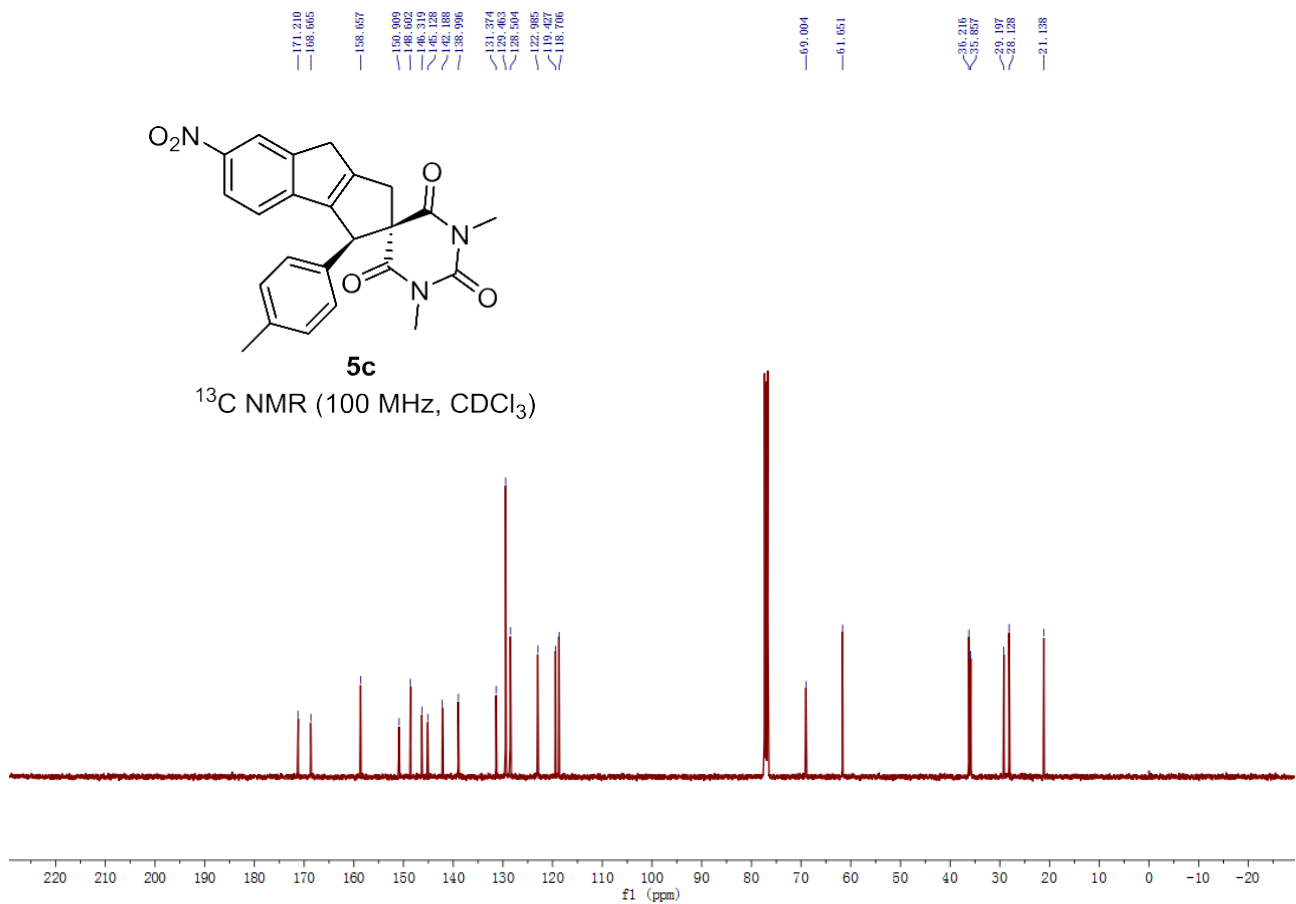

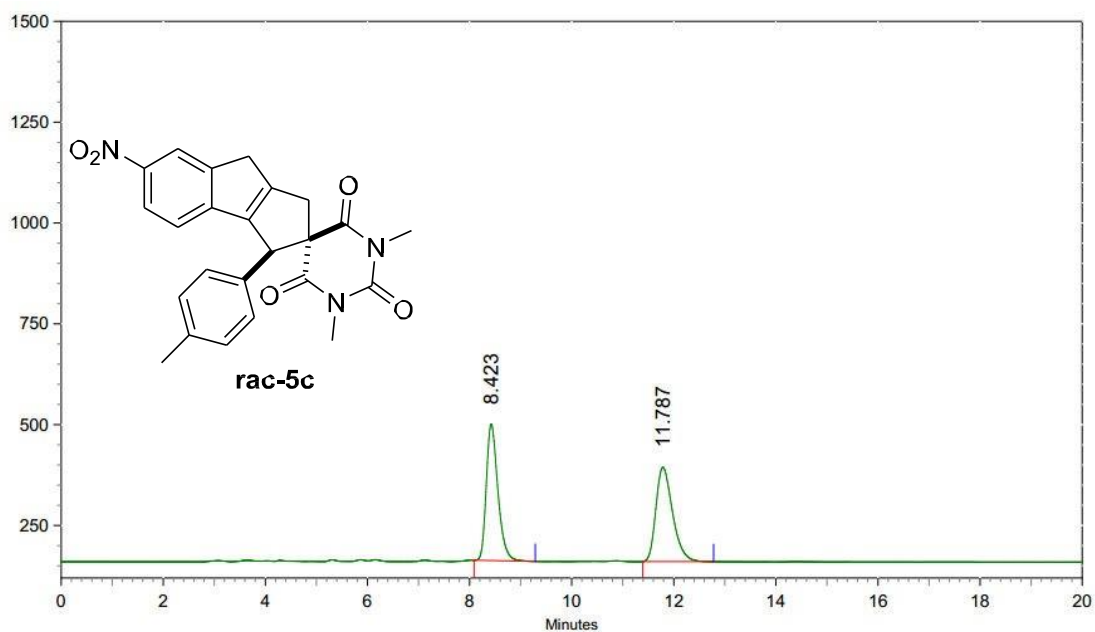

**AREA PERCENT REPORT**

| Peak No. | Ret Time | Width | Height  | Area     | Area [%] |
|----------|----------|-------|---------|----------|----------|
| 1        | 8.423    | 1.200 | 5678778 | 89672989 | 50.2062  |
| 2        | 11.787   | 1.387 | 3921789 | 88936385 | 49.7938  |

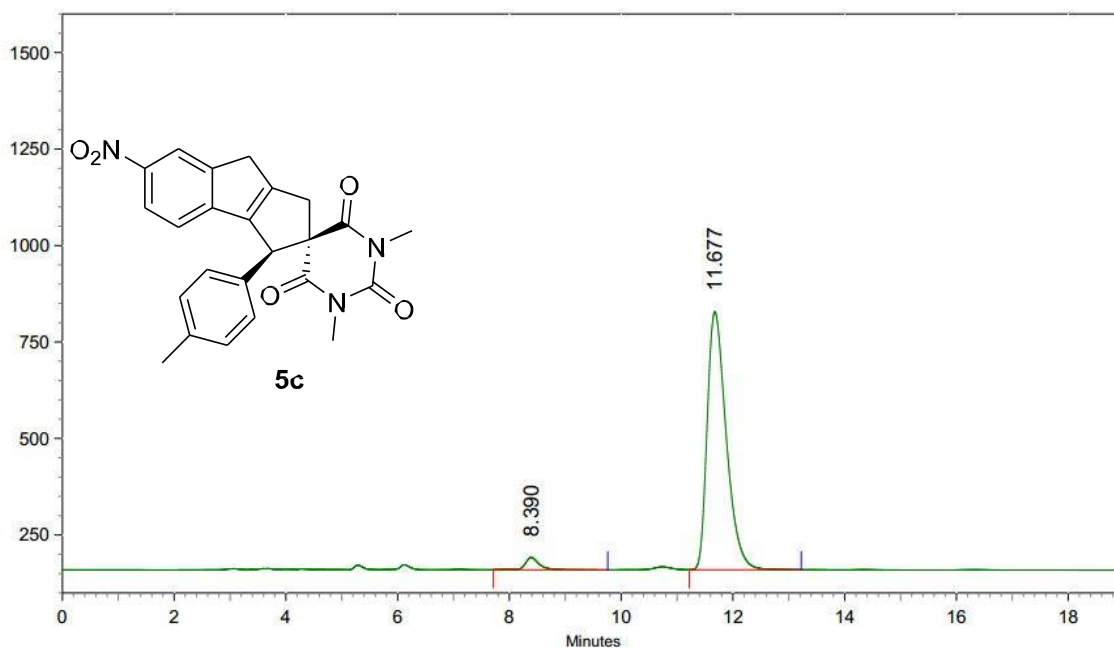

**AREA PERCENT REPORT**

| Peak No. | Ret Time | Width | Height   | Area      | Area [%] |
|----------|----------|-------|----------|-----------|----------|
| 1        | 8.390    | 2.047 | 540551   | 9743247   | 3.5409   |
| 2        | 11.677   | 2.003 | 11214717 | 265421495 | 96.4591  |

# Spectrum Plot Report

|                |                   |              |       |            |              |                   |                                  |
|----------------|-------------------|--------------|-------|------------|--------------|-------------------|----------------------------------|
| Name           | CYC-20200824-29   | Rack Pos.    |       | Instrument | Instrument 1 | Operator          |                                  |
| Inj. Vol. (ul) | 10                | Plate Pos.   |       | IRM Status | Success      |                   |                                  |
| Data File      | CYC-20200824-29.d | Method (Acq) | TOF.m | Comment    |              | Acq. Time (Local) | 8/27/2020 2:49:36 PM (UTC+08:00) |

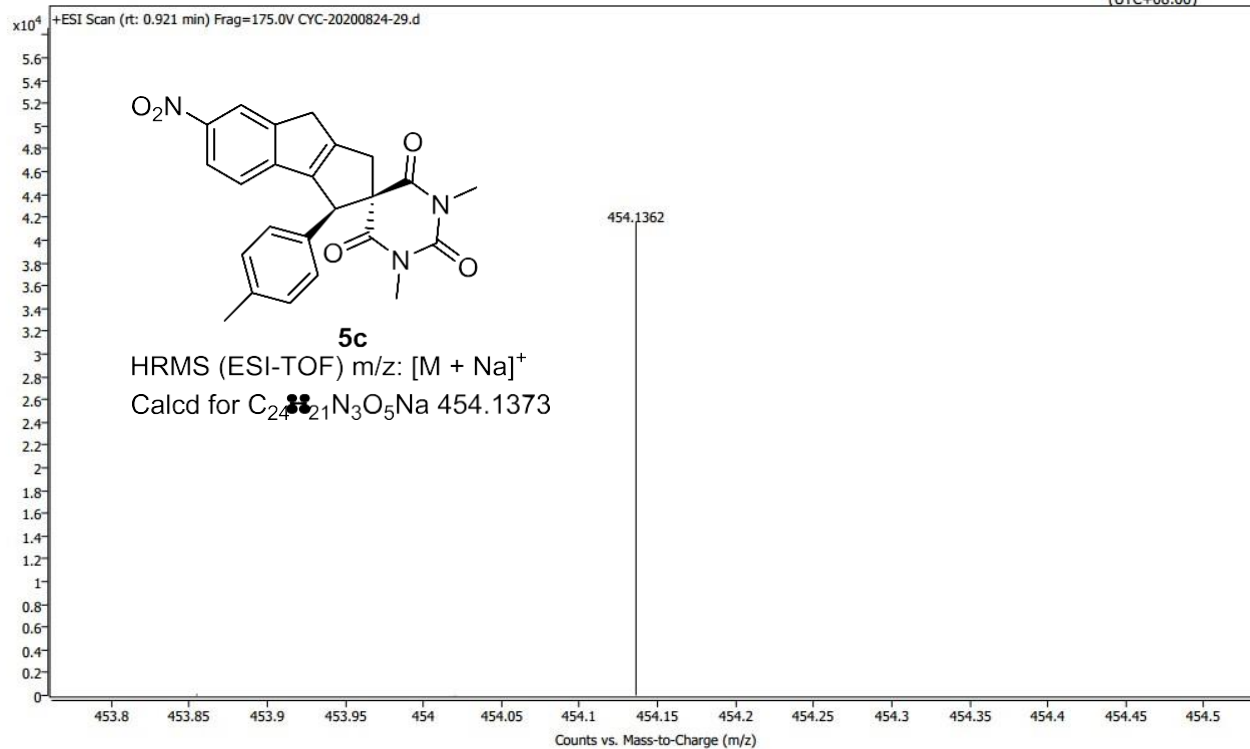



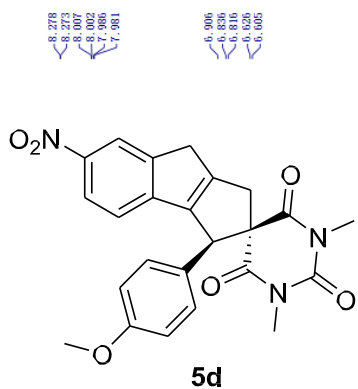

$^1\text{H}$  NMR (400 MHz,  $\text{CDCl}_3$ )

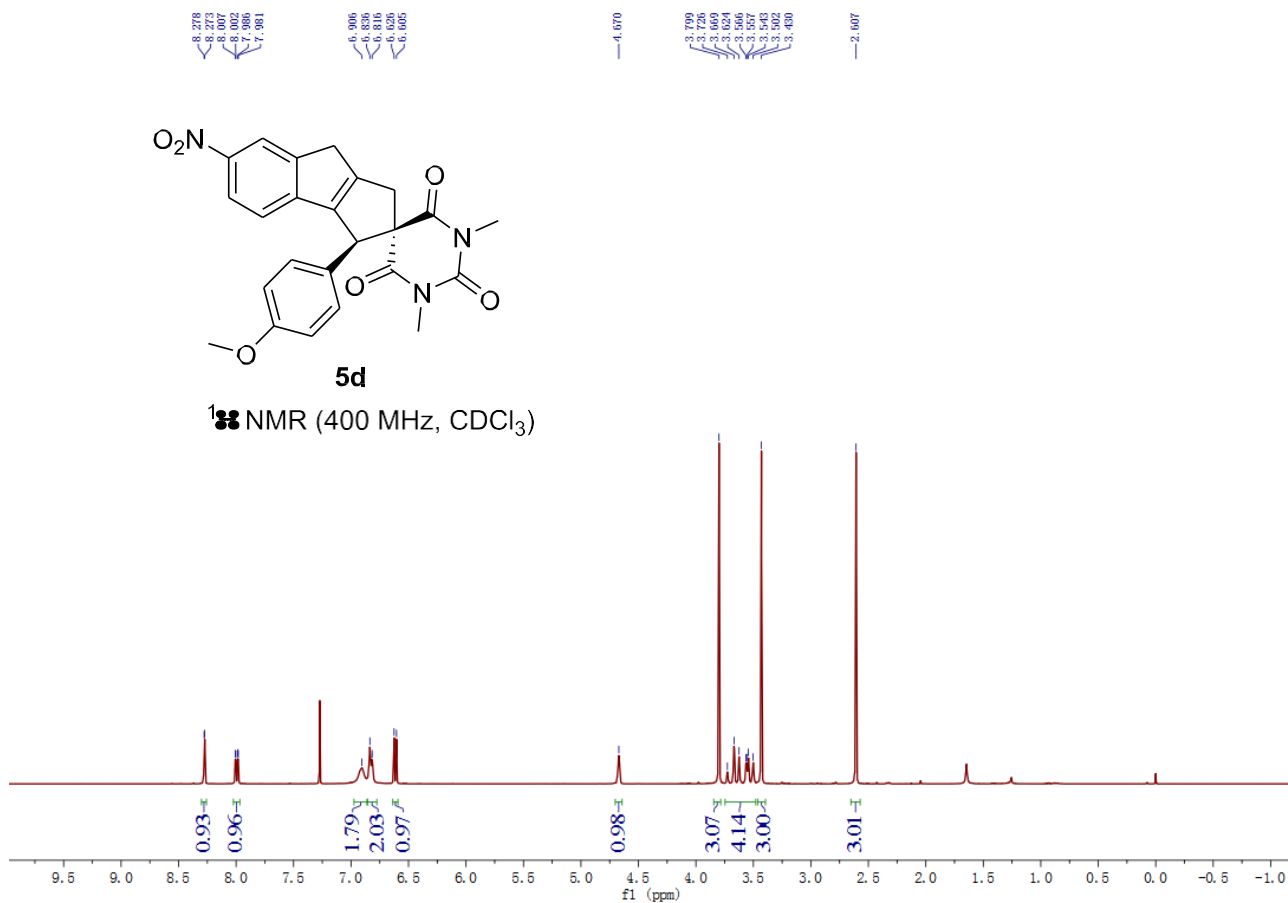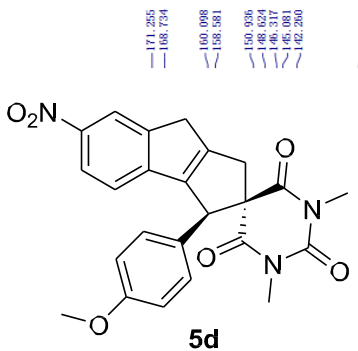

$^{13}\text{C}$  NMR (100 MHz,  $\text{CDCl}_3$ )

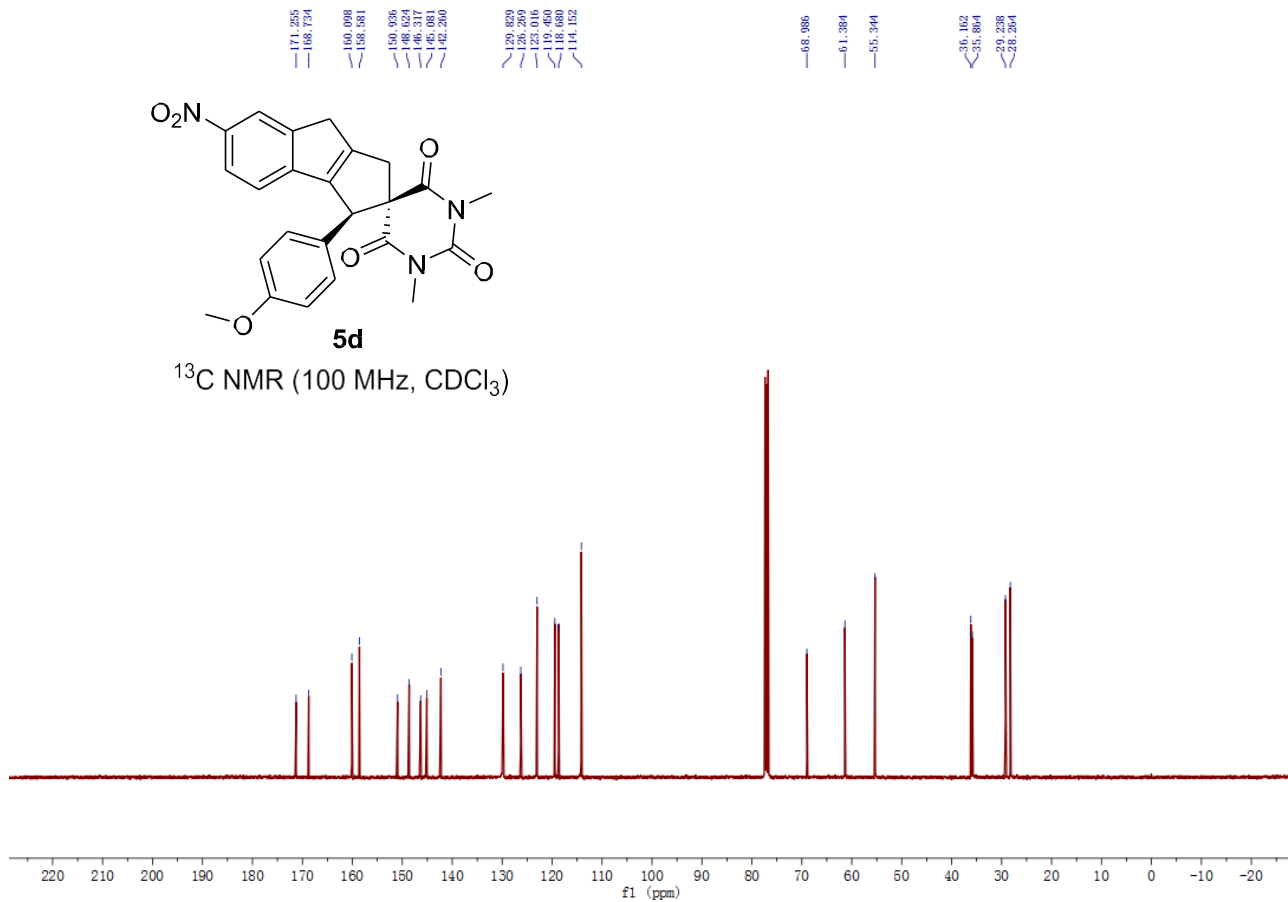

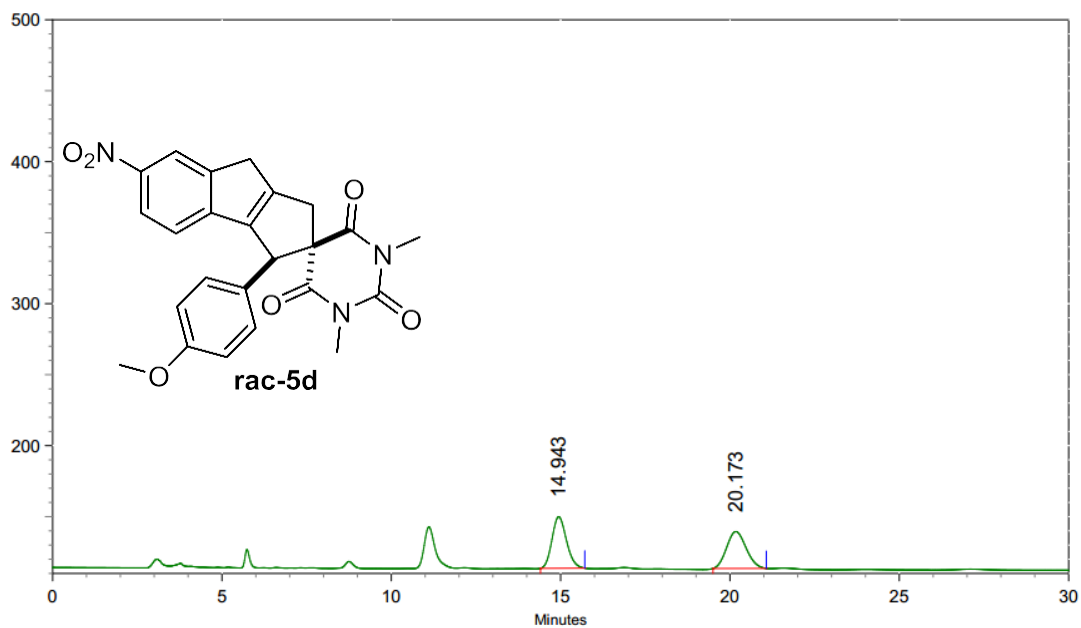

**AREA PERCENT REPORT**

| Peak No. | Ret Time | Width | Height | Area     | Area [%] |
|----------|----------|-------|--------|----------|----------|
| 1        | 14.943   | 1.307 | 608903 | 18110113 | 51.0009  |
| 2        | 20.173   | 1.573 | 435975 | 17399257 | 48.9991  |

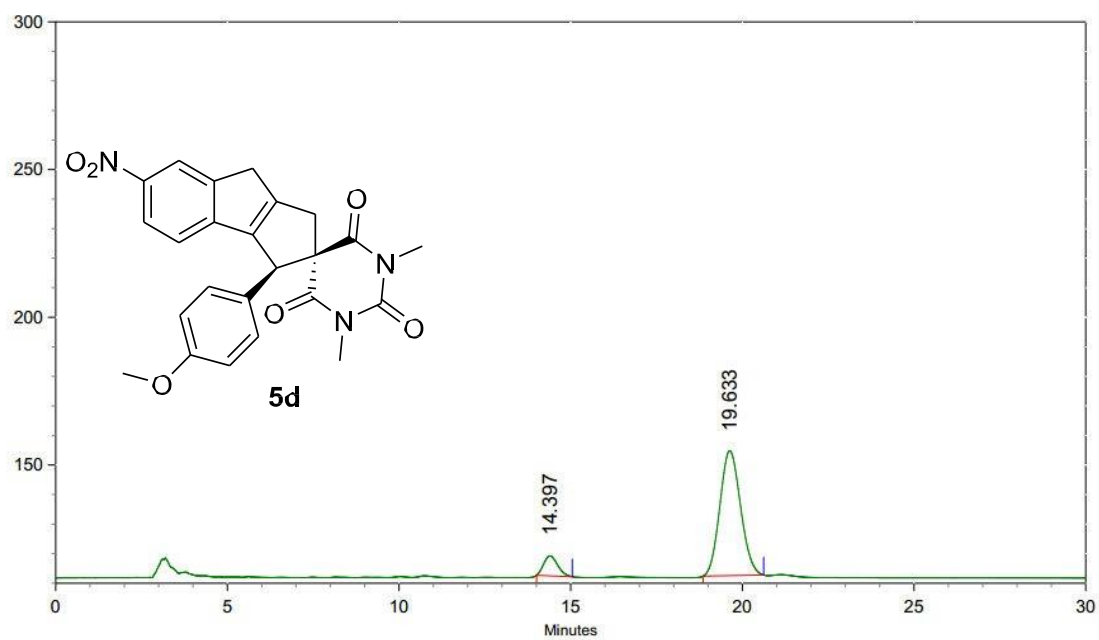

**AREA PERCENT REPORT**

| Peak No. | Ret Time | Width | Height | Area     | Area [%] |
|----------|----------|-------|--------|----------|----------|
| 1        | 14.397   | 1.040 | 113070 | 3190962  | 9.6905   |
| 2        | 19.633   | 1.760 | 709381 | 29737678 | 90.3095  |

# Spectrum Plot Report

|                |                   |              |       |            |              |                   |                      |
|----------------|-------------------|--------------|-------|------------|--------------|-------------------|----------------------|
| Name           | CYC-20200824-27   | Rack Pos.    |       | Instrument | Instrument 1 | Operator          |                      |
| Inj. Vol. (ul) | 10                | Plate Pos.   |       | IRM Status | Success      | Acq. Time (Local) | 8/27/2020 2:43:37 PM |
| Data File      | CYC-20200824-27.d | Method (Acq) | TOF.m | Comment    |              |                   | (UTC+08:00)          |

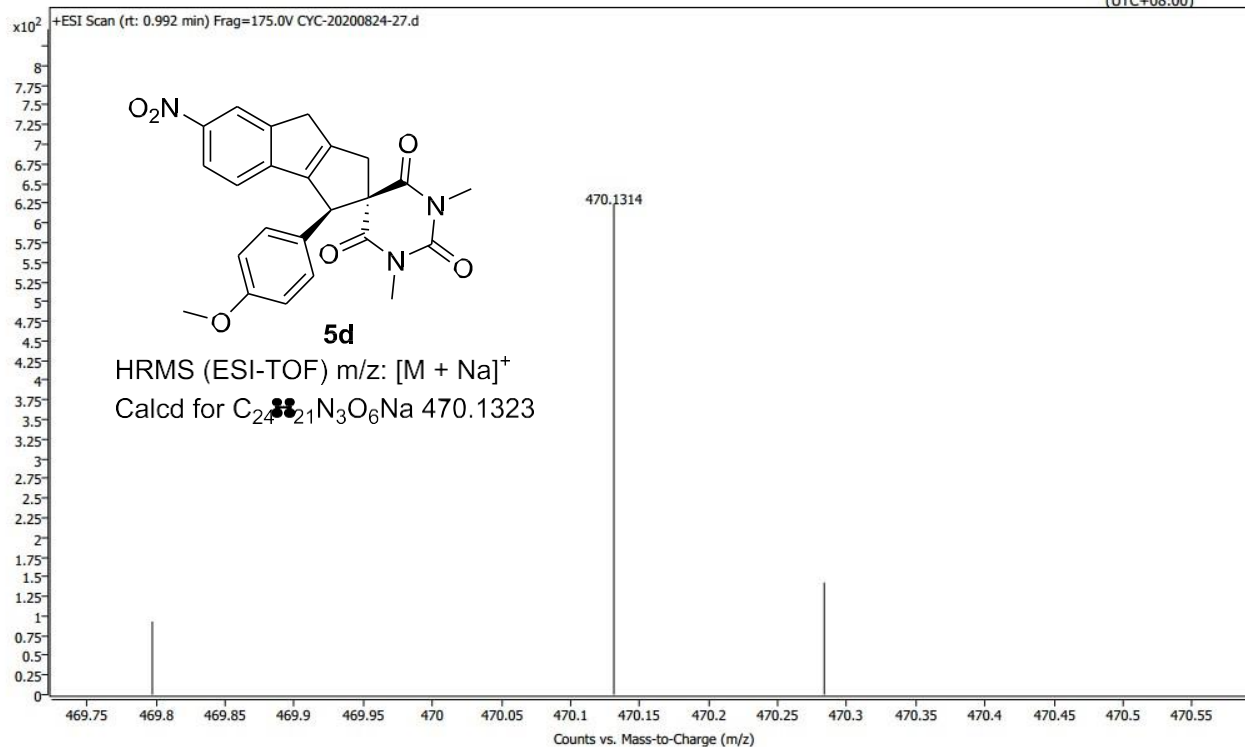

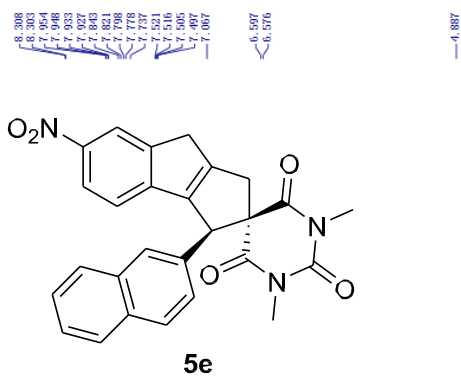

<sup>1</sup>H NMR (400 MHz, CDCl<sub>3</sub>)

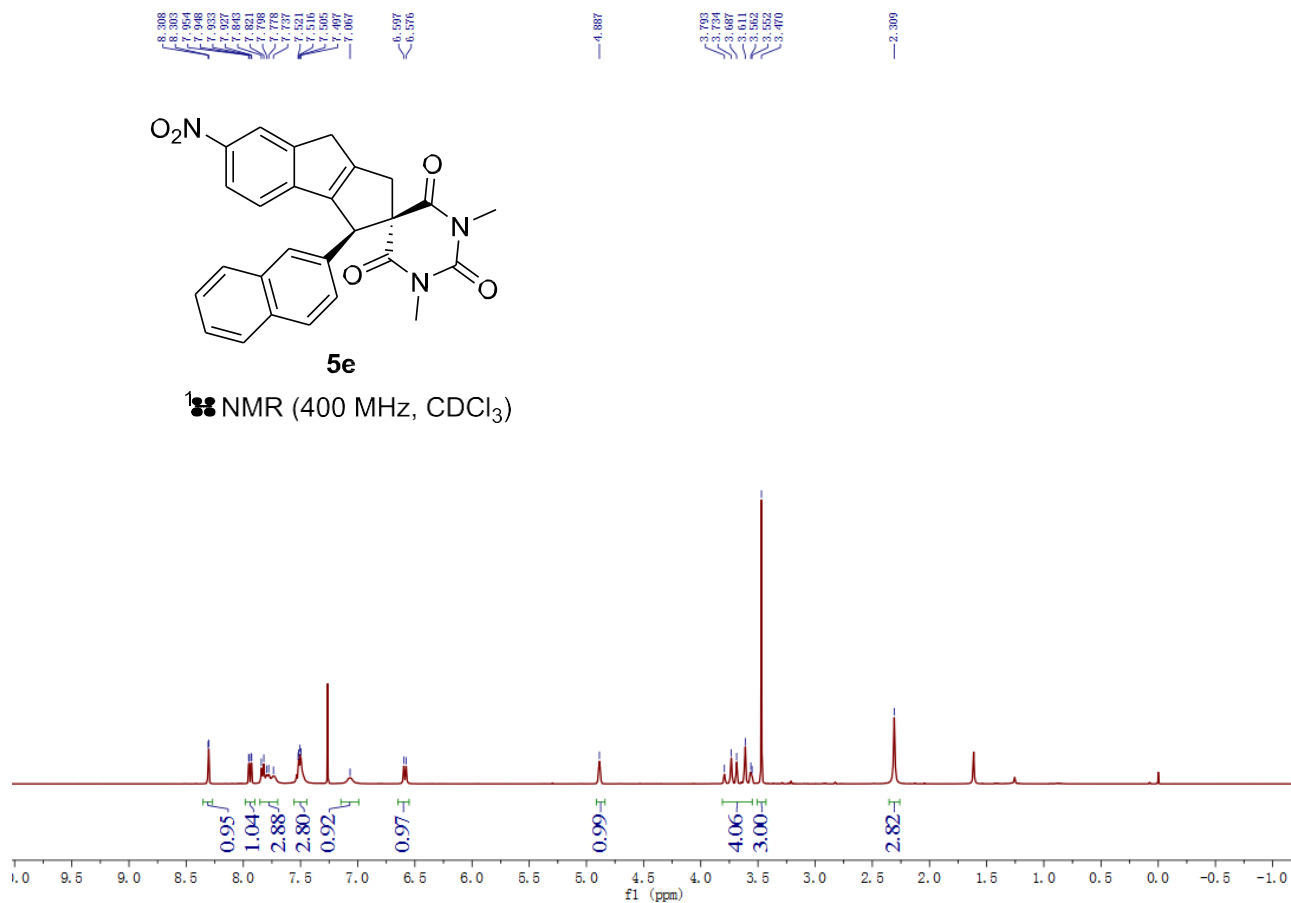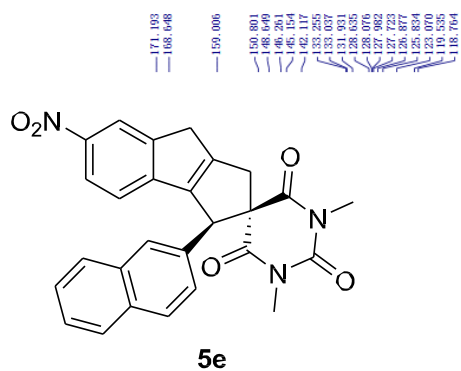

<sup>13</sup>C NMR (100 MHz, CDCl<sub>3</sub>)

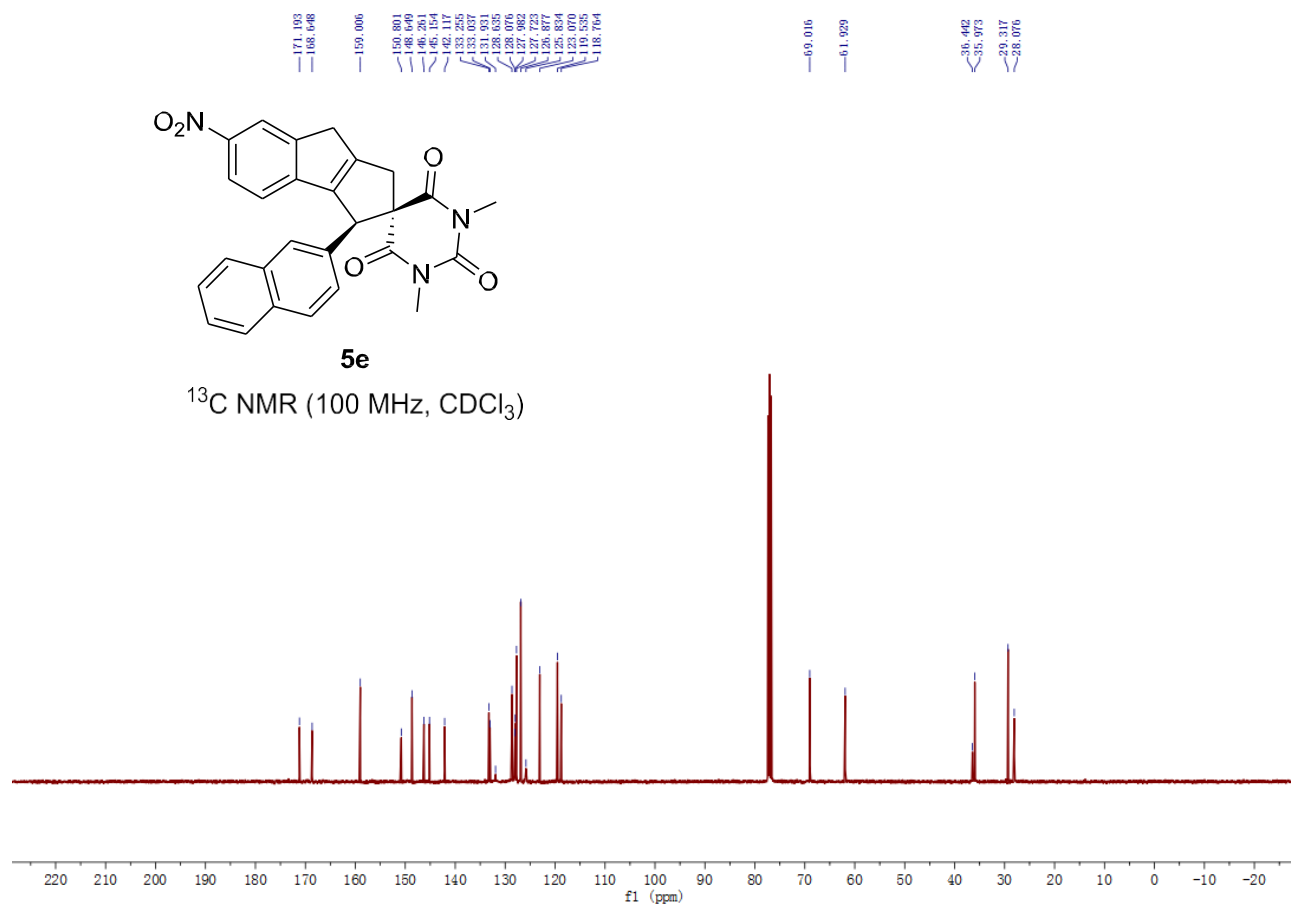

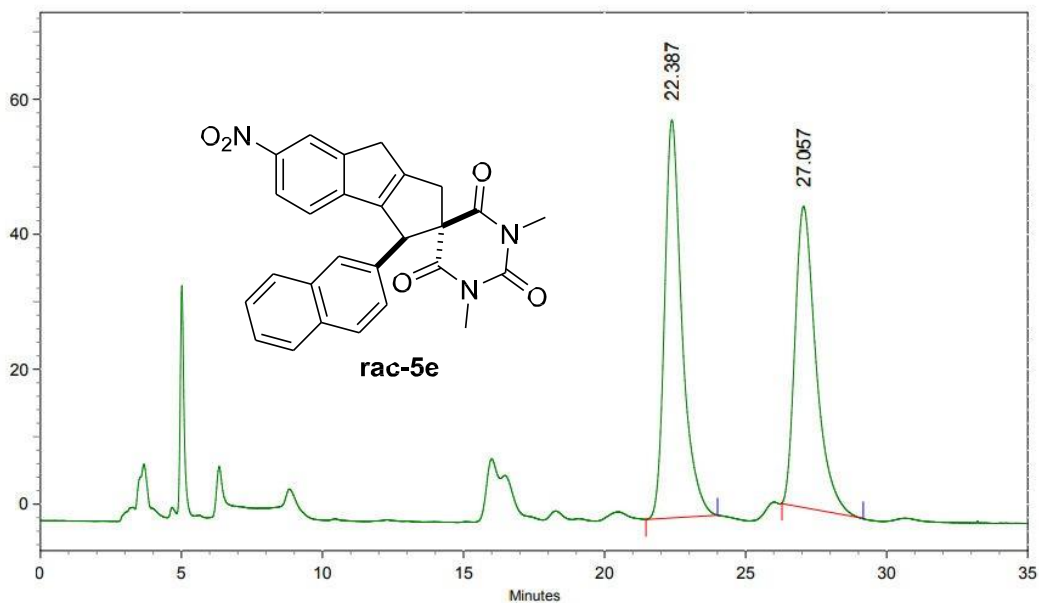

**AREA PERCENT REPORT**

| Peak No. | Ret Time | Width | Height | Area     | Area [%] |
|----------|----------|-------|--------|----------|----------|
| 1        | 22.387   | 2.540 | 989286 | 42525262 | 52.4179  |
| 2        | 27.057   | 2.880 | 748518 | 38602032 | 47.5821  |

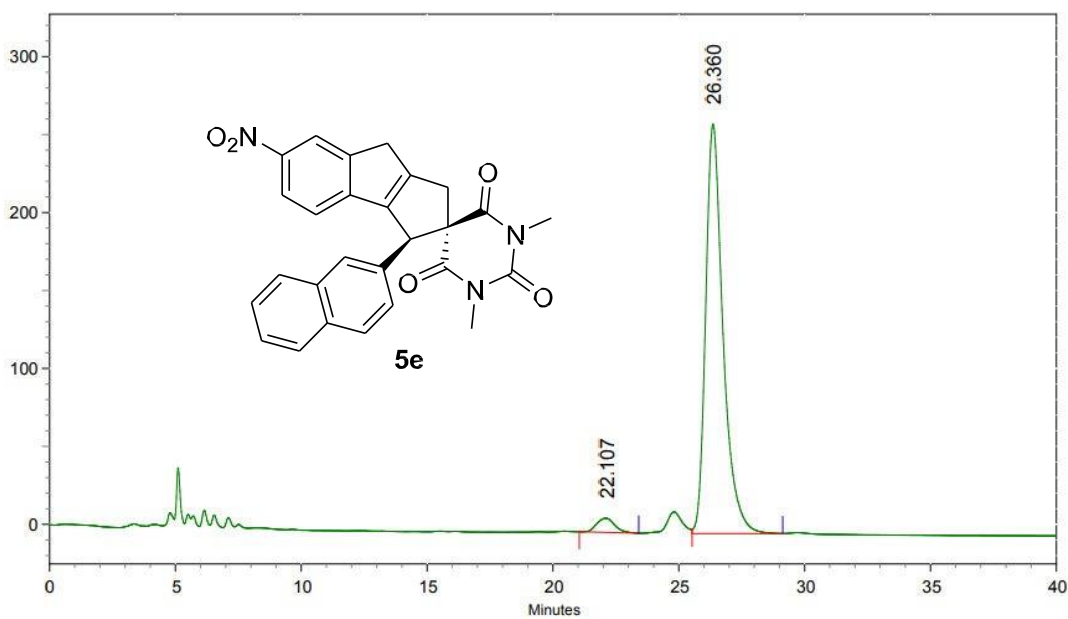

**AREA PERCENT REPORT**

| Peak No. | Ret Time | Width | Height  | Area      | Area [%] |
|----------|----------|-------|---------|-----------|----------|
| 1        | 22.107   | 2.363 | 152557  | 7509188   | 3.4318   |
| 2        | 26.360   | 3.603 | 4406361 | 211301278 | 96.5682  |

# Spectrum Plot Report

|                |                   |              |            |              |                                                    |
|----------------|-------------------|--------------|------------|--------------|----------------------------------------------------|
| Name           | CYC-20200824-30   | Rack Pos.    | Instrument | Instrument 1 | Operator                                           |
| Inj. Vol. (ul) | 10                | Plate Pos.   | IRM Status | Success      |                                                    |
| Data File      | CYC-20200824-30.d | Method (Acq) | TOF.m      | Comment      | Acq. Time (Local) 8/27/2020 2:52:37 PM (UTC+08:00) |

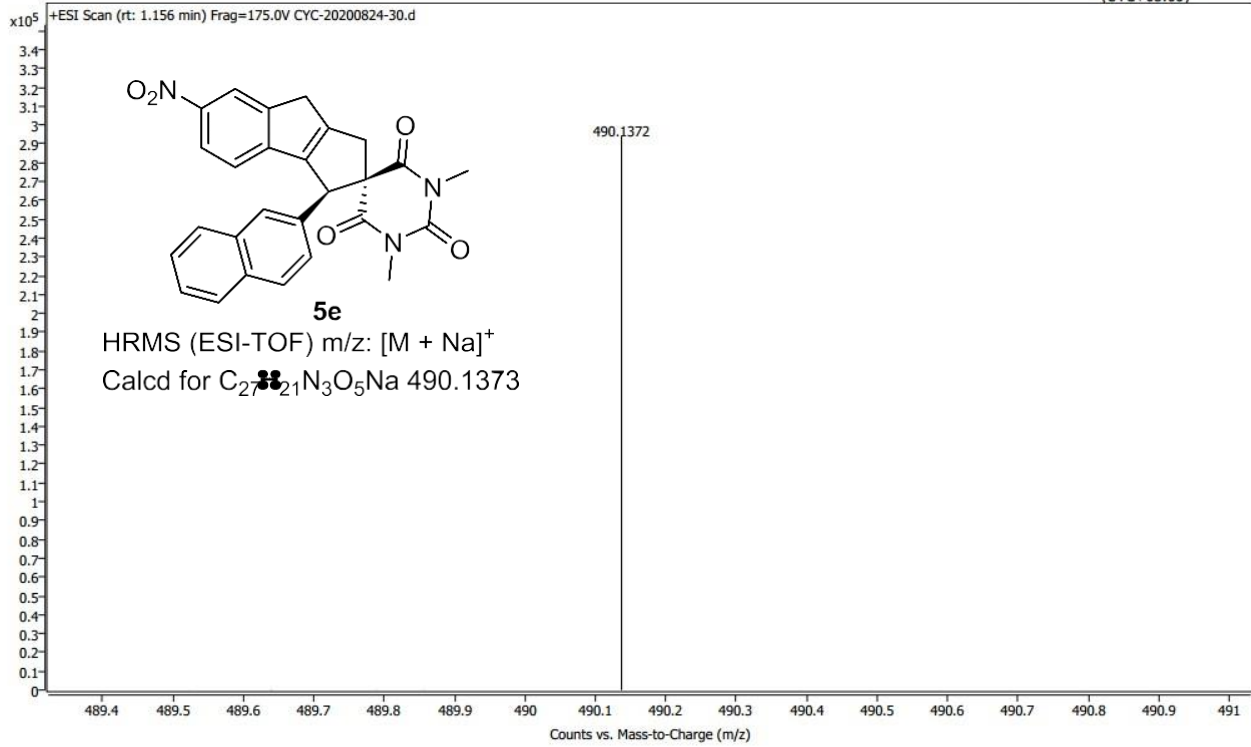

8.290  
8.284  
8.100  
8.085  
8.079  
7.401  
6.609  
6.589  
6.384  
6.359  
6.352  
6.083  
6.075  
4.846  
3.705  
3.681  
3.674  
3.637  
3.547  
3.538  
3.528  
3.509  
3.484  
3.478  
3.471

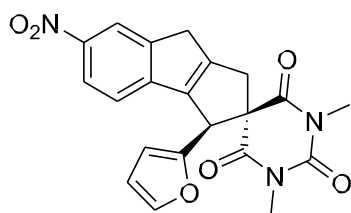

**5f**

<sup>1</sup>H NMR (400 MHz, CDCl<sub>3</sub>)

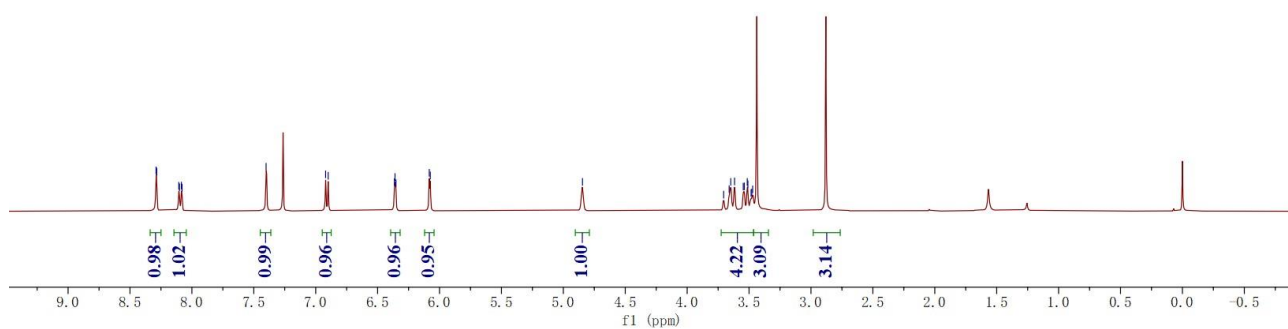

3

170.822  
168.469  
158.996  
151.041  
148.574  
148.544  
146.979  
146.255  
143.436  
139.653  
123.080  
119.526  
118.550  
11.905  
10.365  
-67.678  
-54.490  
-36.525  
-35.901  
-29.319  
-28.753

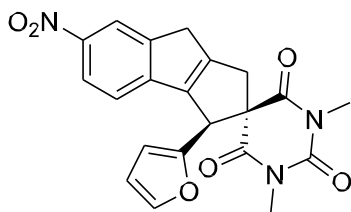

**5f**

<sup>13</sup>C NMR (100 MHz, CDCl<sub>3</sub>)

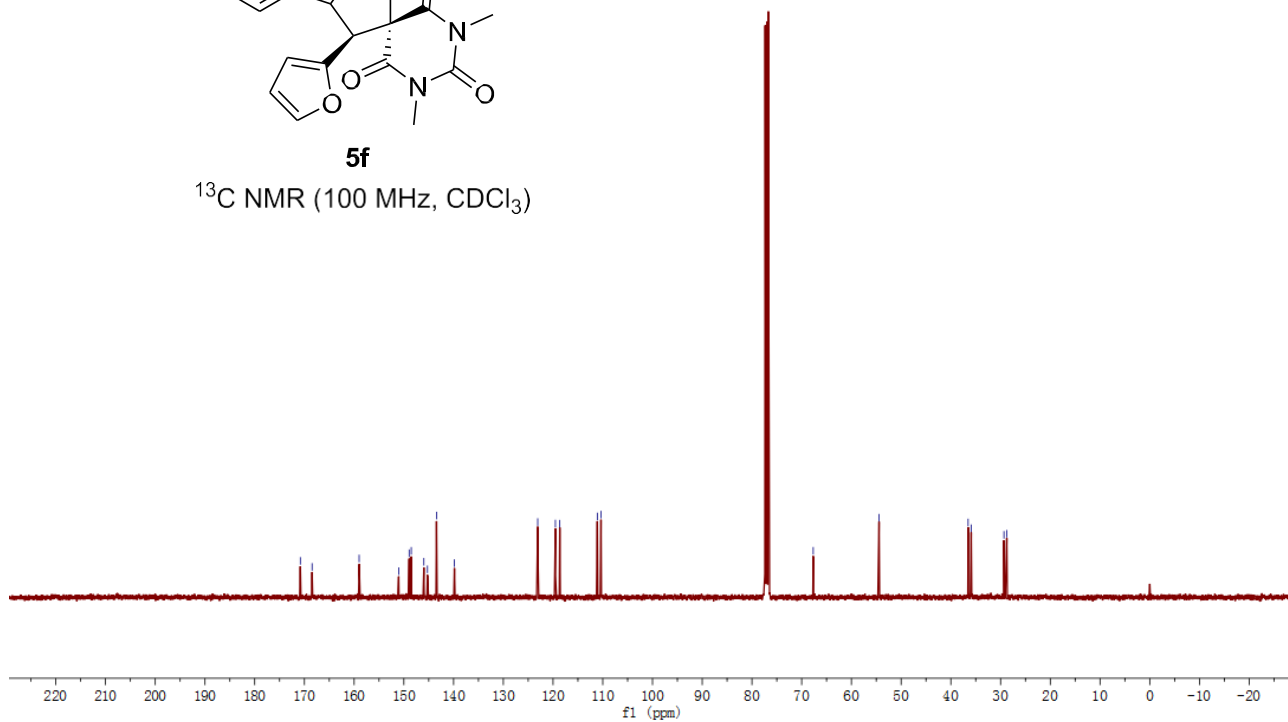

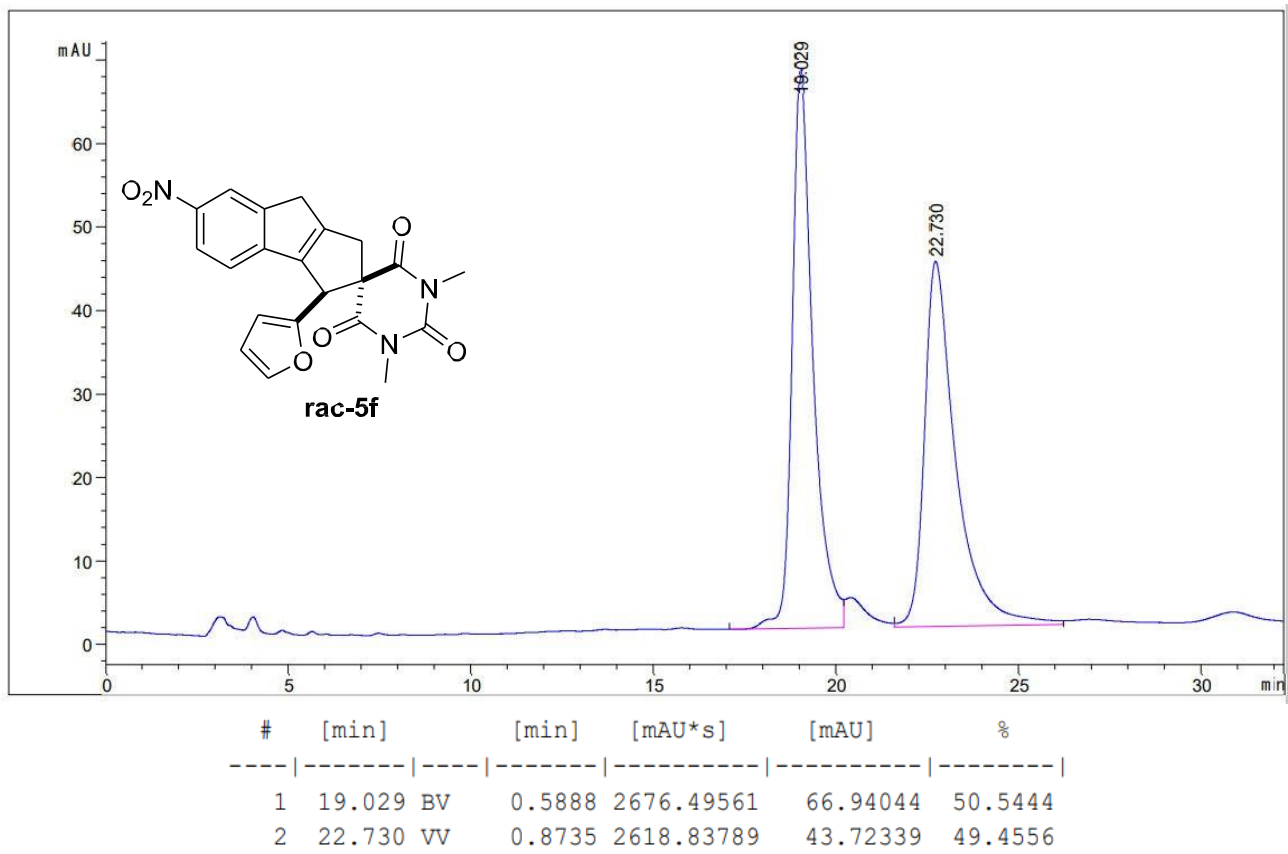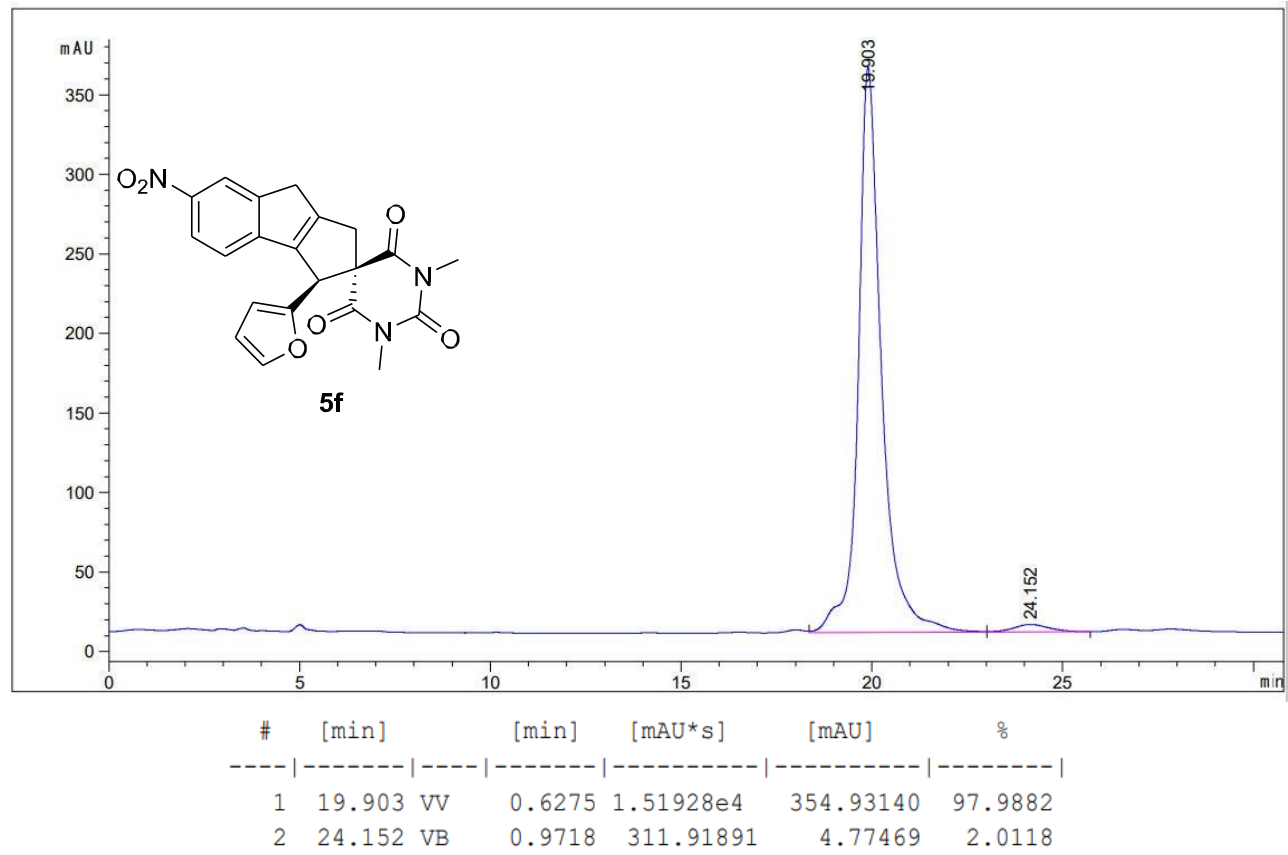



# Spectrum Plot Report

|                |                  |              |                |            |              |                   |                     |
|----------------|------------------|--------------|----------------|------------|--------------|-------------------|---------------------|
| Name           | CYC-20200104-4   | Rack Pos.    |                | Instrument | Instrument 1 | Operator          |                     |
| Inj. Vol. (ul) | 8                | Plate Pos.   |                | IRM Status | Success      | Acq. Time (Local) | 1/6/2021 7:27:32 PM |
| Data File      | CYC-20200104-4.d | Method (Acq) | ZYJ-20201106.m | Comment    |              | (UTC+08:00)       |                     |

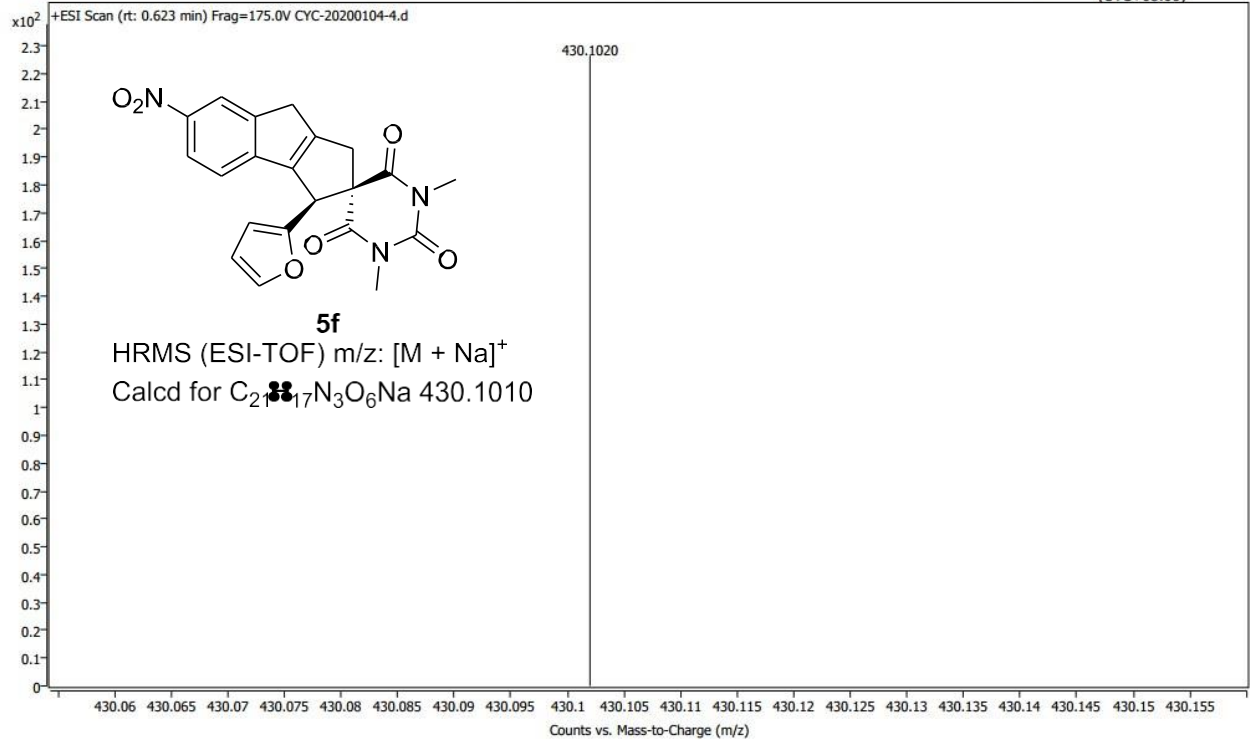

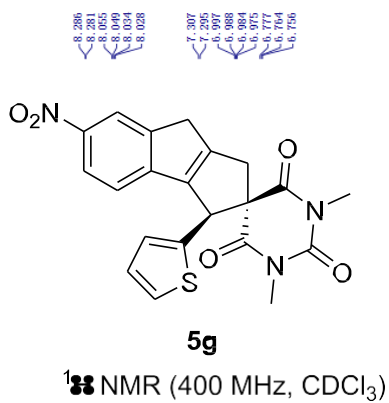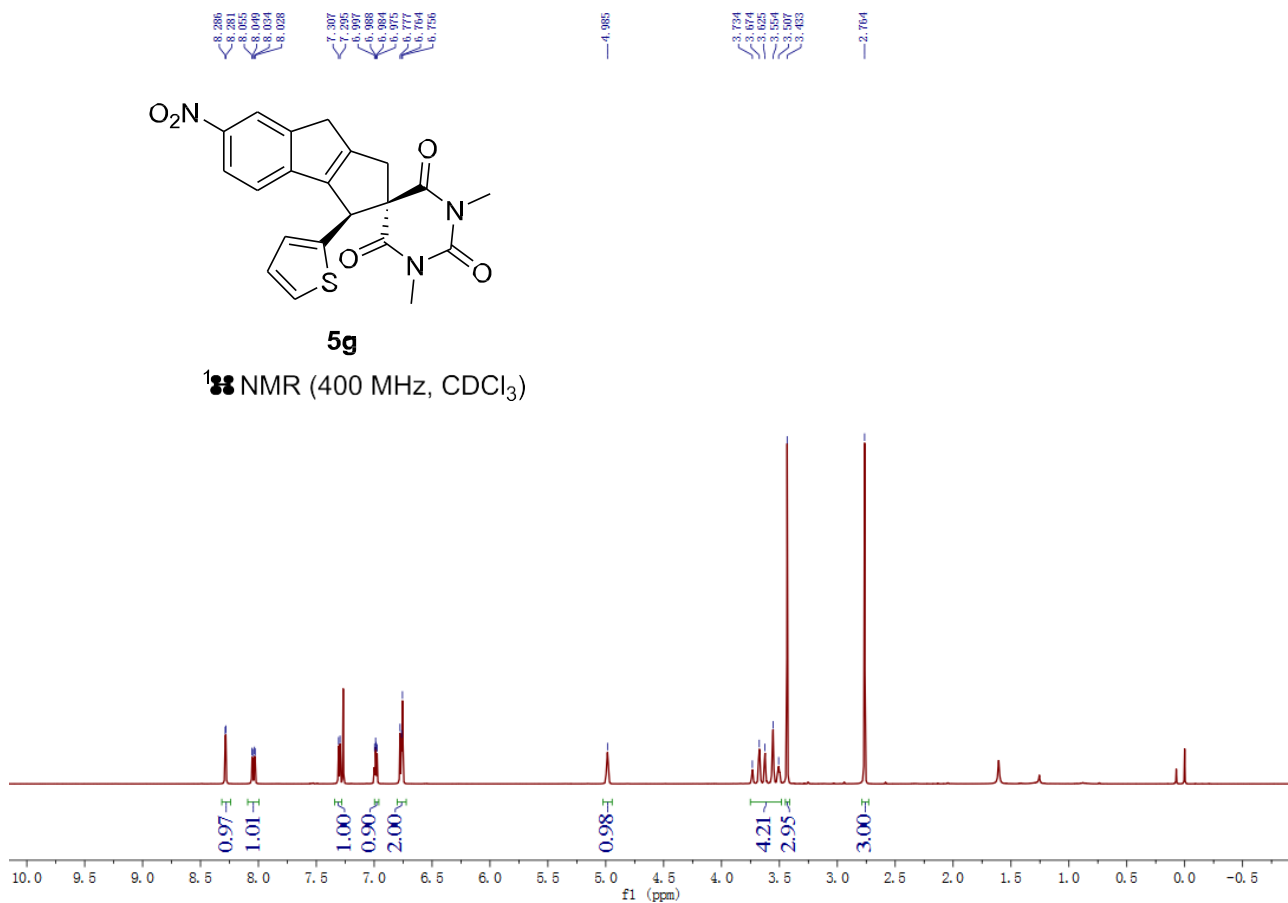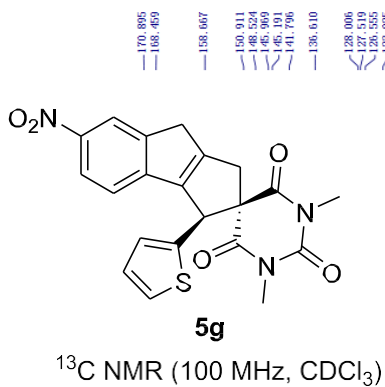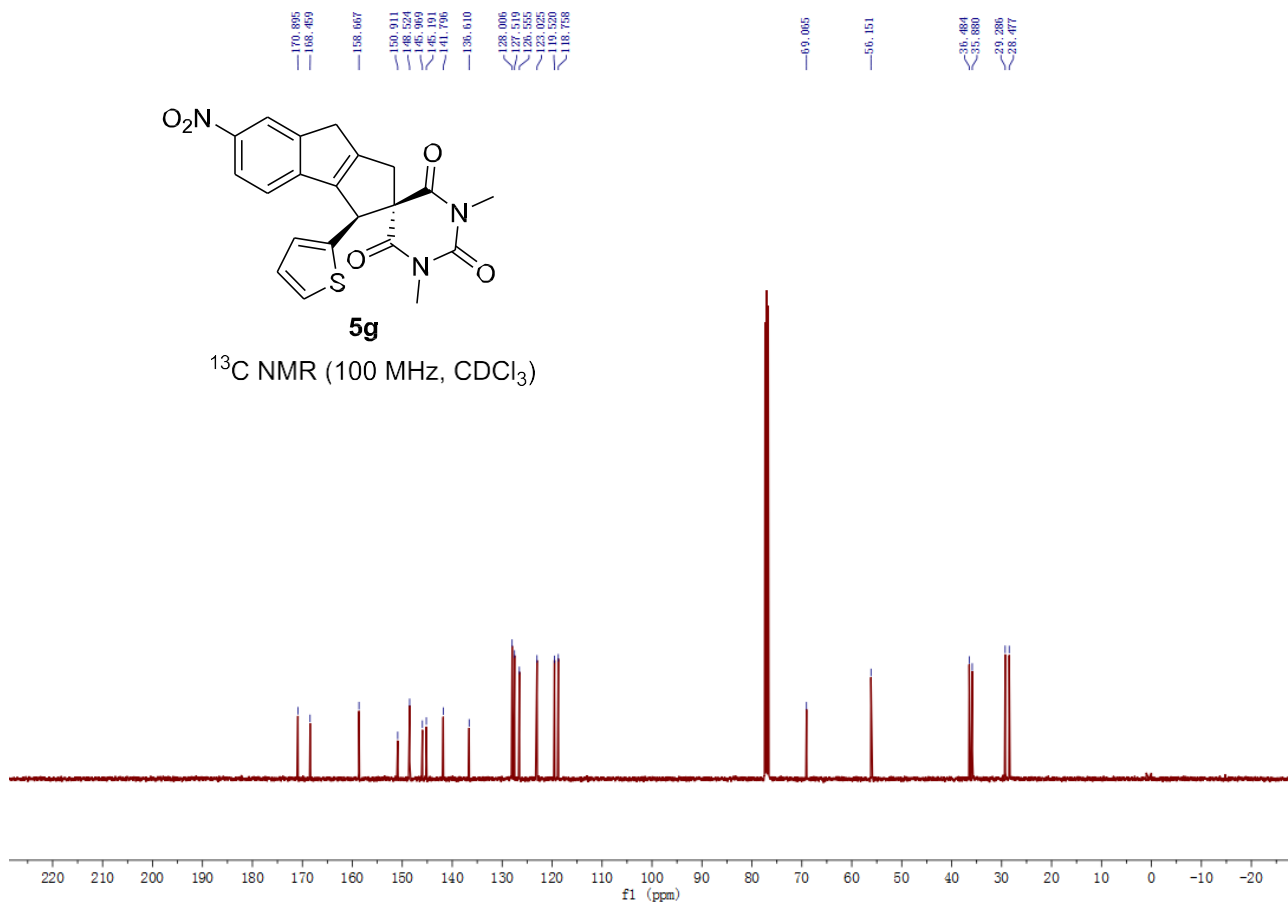

Supplement: d2sc02985e1.pdf [file d2sc02985e1.pdf]
